# Supplementary material for: The autophagy receptor NBR1 directs the clearance of photodamaged chloroplasts
Source: eLife. 2023 Apr 18;12:e86030. doi: 10.7554/eLife.86030 (PMC10156165; doi:10.7554/eLife.86030)
Supplement: Source data 1. [file elife-86030-data1.xlsx]

## Sheet: Fig 1B Chl assoc with NBR1
Figure 1B: Percentage chloroplasts associated with NBR1-GFP after 24 h HL exposure
LL	HL
0	0
0	0
0	0.558659
0	0
0	0
0	1.19048
0	0.990099
0	0.819672
0	1.6129
0	1.85185
0	0
0	0
0	0
0	0
0	0
0	0.862069
0	1.20482
0	0
0	0
0	0
0	0
0	0
0	4.62963
0	2.27273
0	0.775194
0	1.92308
0	2.77778
0	0
0	1.25
0	1.76991
0	1.5625
0	1.62602
0	0
0	0.840336
0	0.917431
0	2.17391
	1.3245
	1.63934
	0.70922
	1.65289
	3.2967
	0
	0
	0.980392
	3.22581
	3.07692
	1.94175
	3.92157
	1.28205
	0
	2.12766
	2.7027

## Sheet: Fig 1C Ch fl intensity
Figure 1C: Chlorophyll mean intensity
LL		12 hr Recover			24 hr Recover
Without NBR1		Chlp without NBR1	Chl with NBR1		Chl without NBR1	Chl with NBR1
73.82		91.255	43.724		81.329	44.573
97.848		82.429	53.584		63.739	31.019
102.081		96.011	57.102		100.563	50.684
104.702		79.177	57.887		108.867	66.73
101.186		102.971	91.976		99.973	42.985
107.682		79.718	42.916		91.16	58.463
94.667		100.49	52.681		68.927	28.938
112.115		96.257	65.588		107.769	79.956
101.768		49.749	45.019		98.271	51.401
		105.687	51.309		85.364	55.053
		98.325	34.687		76.635	2.467
		99.864	77.141		78.289	30.826
		103.186	58.242		84.562	59.32
		85.438	12.45
		84.519	55.063
		93.44	92.849
		75.985	54.591

## Sheet: Fig 1D Fl ratio
Figure 1D Fluorescence intensity ratio
Chlp without NBR1-GFP				Chlp with NBR1
Intensity at 517.4	Intensity at 683.4	Ratio 517.4/683.4		Intensity at 517.4	Intensity at 683.4	Ratio 517.4/683.4
49.5	3868	0.0127973		58.9	2853	0.0206449
23	2399.9	0.00958373		29.6	1745.7	0.0169559
25.7	2505.1	0.0102591		83.5	2532.2	0.0329753
28.8	2388.4	0.0120583		54	1704.2	0.0316864
46	3019.6	0.0152338		54.8	2330.8	0.0235112
34.6	2836.2	0.0121994		56.16	2233.18	0.025148

## Sheet: Fig 1 F Ch-NBR1 over time
Figure 1F Percentage of chloroplasts associated with mCherry-NBR1
nbr1 LL			atg7 LL			nbr1 6hr after HL			atg7 6hr after HL			nbr1 12hr after HL			atg7 12hr after HL			nbr1 24hr after HL			atg7 24hr after HL
%coat	%inside		%coat	%inside		%coat	%inside		%coat	%inside		%coat	%inside		%coat	%inside		%coat	%inside		%coat	%inside
0	0		0	0		0	0		0	0		1.41	0		0	0		0	0		1.87	3.12
0	0		0	0		0	0		0	0		0.43	0		1.25	0		0	0		0.38	1.16
0	0		0	0		0	0		0	0		0.82	0.82		0.7	0		0	0		0.91	1.82
0	0		0	0		0	0		0	0		0	0		0	0		0	0		0.74	1.11
			0	0					0	0		2.42	0		0	0		0.75	0.75		0.83	0.42
			0	0								3.12	0		0	0		0	0.39		0.42	0.42
												1.37	1.37		2.77	3.47		0.41	0		1.21	1.61
												1.05	0		1.13	2.82		0	0		0	0
															1.3	1.95		0.49	0.49		0	0
															3.37	0.56		0	0.87		0	1.02
															2.14	0		0	0		0.73	1.099
															2.31	0.58		0	0.44		0	1.21
															2.26	0.56		0	0		1.56	4.16
															0.82	0.82		0	0		2.81	0.7
															0.57	0		0	0		2.33	0.39

## Sheet: Fig 2D Chl types EM
Figure 2D: Percentage of chloroplasts/cell
atg7			nbr1			WT
Type1	Type 2	Type 3	Type1	Type 2	Type 3	Type1	Type 2	Type 3
6.6	46.6	46.6	25	75	0	100	0	0
0	100	0	100	0	0	66.6	33.3	0
44.4	38.9	16.6	100	0	0	75	25	0
28.5	35.7	35.7	100	0	0	66.6	33.3	16.6
47	29.4	23.5	100	0	0	50	50	0
40	46.6	13.3	80	0	0	80	20	0
60	40	0	66.6	33.3	0	66.6	16.6	0
			60	20	0	80	20	0
			80	20	20	60	20	20
			75	25	20

## Sheet: Fig 2F Gold labeling
Figure 2F: Gold particle density
Type 1 chloroplasts			Type 2 Chloroplasts			Type 3 Chloroplasts	Cytosol
WT	atg7	nbr1	WT	atg7	nbr1	atg7	WT	atg7	nbr1
0.0661376	3.37838	0	0.258065	1.38614	0.0710732	18.8	0.625	0.356013	0
0.11396	1.37931	0.165563	0.451128	1.21359	0	7.16667	0.147384	0.446872	0.240964
0.328639	1.19048	0	1.03448	1.38462	0	5	0.0866551	0.304348	0
0.150376	0.656934	0.232558	0.301334	1.27907	0	10.2158	0.11534	0.670732	0.232558
0.113636	0.666667	0	2.12389	0.909091	0	1.93906	0	0.239521	0.147059
0.203417		0.106383	0.588235	1.13402	0.322581	15.8333		0.2457	0.357143
		0		1.1	0			0.489297	0
		0		0.5				0.0961538	0
		0		0.820896				0.481481	0
								0.0512821	0
									0.361446

## Sheet: Fig 3B Chl with NBR1 or ATG8
Figure 3B: Chloroplasts associated with GFP-ATG8A and mCherry-NBR!
LL				6hr recover				12hr recover				24hr recover
% GFP-ATG8	% mCh-NBR1	% Both		% GFP-ATG8	% mCh-NBR1	% Both		% GFP-ATG8	% mCh-NBR1	% Both		% GFP-ATG8	% mCh-NBR1	% Both
0	0	0		4.58015	0	0		9.30233	6.39535	4.06977		3.57143	7.14286	1.42857
0	0	0		2.75862	0	0		6.60793	5.28634	0.881057		7.62712	9.32203	4.23729
0	0	0		0	0.546448	0		11.7647	5.88235	1.76471		1.5873	4.2328	1.0582
0	0	0		0.552486	0.552486	0		12.3377	9.74026	0		5.7377	4.91803	1.63934
0	0	0						6.97674	6.04651	1.39535		9.93789	4.96894	2.48447
								3.73832	2.80374	0.46729		7.6087	4.8913	1.63043
								3.28638	2.8169	0.469484		6.58436	3.7037	1.23457
								2.30263	2.96053	0.986842		5.05051	4.54545	1.0101
								3.46154	3.46154	0.384615		12.3656	9.67742	3.76344
								4.20561	3.27103	0.934579		9.71429	4.57143	2.28571
								1.9305	1.1583	0.3861		5.32787	3.68852	1.22951
								3.48259	4.47761	1.99005
								1.5873	2.1164	1.0582

## Sheet: Fig 3D Chl associated with GFP-
Figure 3D: Pecentage of chloroplasts associated with GFP-ATG8A
WT LL	atg7 LL	nbr1 LL		WT 6h	atg7 6h	nbr1 6h		WT 24h	atg7 24h	nbr1 24h
0	0	0		0	0	0.552486		1.19048	0	1.2605
0	0	0		0	0	0		3.21101	0	1.50754
0	0	0		1.75439	0	1.0101		0.537634	0	0.414938
0	0	0		1.53846	0	0		2.45902	0	5.82524
0	0	0		0.552486	0	0.680272		3.76344	0	4.06091
0	0	0		3.19635	0	0.677966		2.9703	0	6.47059
0	0	0		1.49254	0	0.452489		1.63934	0	1.3986
0	0	0		4.72103	0	0.510204		3.91304	0	2.77778
0	0	0		6.09756	0	1.40845		1.36986	0	3.1746
0	0	0		3.27273	0	0.442478		3.38164	0	6.31068
0	0	0		5.40541	0	0		2.85714	0	9.55056
0	0	0		8.65385	0.409836	0.238663		4.95495	0	9.20245
0	0			2.75862	0	0.869565		6.08696	0	6.45161
				0.502513	0	1.65975		4.36681	0	5.26316
				0.502513	0	1.49254		10.8434	0	5.625
				0.431034	0	2.27273
				0	0	0
				0.568182	0	0
				6.95187	0	0.588235
				4	0	1.64835
				0	0	2.04082
				0	0	1.21951
				0	0	0.44843
				0	0	0
				2.48756		0
						0.41841
						0.458716
						0.393701

## Sheet: Fig 4C Chl inside vacuoles
Figure 4C: Percentage of cells having UBQ-mCherry-NBR-decorated chloroplasts inside vacuoles
nbr1-2			atg7
LL	HL (12 hr, 24 hr Recovery)		LL	HL (12 hr, 24 hr Recovery)
0	0		0	33.3333
0	0		0	20
0	0		0	0
0	0		0	0
0	33.3333		0	33.3333
0	0		0	0
0	0		0	0
0	0		0	0
0	0		0	0
0	0		0	33.3333
0	16.6667		0	25
0	11.1111		0	33.3333
0	0		0	50
	0		0	0
	14.2857		0	0
	0			0
	0			0
	22.2222			0
	20			33.3333
	11.7647			33.3333
	0			0
				0
				0
				0
				25
				0
				0

## Sheet: Fig 5B Chl density
Figure 5B: Number of chloroplasts per 141.7x141.7 um2
WT		atg7		nbr1
NL	SL	NL	SL	NL	SL
218	217	310	235	287	183
254	188	264	211	232	157
222	226	250	226	304	233
242	166	299	229	282	237
219	217	230	211	203	224
219	234	306	245	228	211
204	170	194	280	278	219
277	217	424	246	247	248
226	225	383	200	263	173
250	229	309	285	303	185
230	193	387	237	203	192
229	265	335	248	237	217
218	254	373	235	248	233
186	198	352	265	209	184
240	95	310	236	288	236
258	116	302	232	278	211
311	121	293	297	262	160
298	107	322	253	291	263
313	183	312	303	216	224
266	187	307	250	257	303
227	167		269	250	230
270	211		258	245	173
257	237		292	235	123
239	271		309	259	191
280	153		358	305	182
255	180		287		178
289	201		302		241
269	227		294		222
292	192		334		263
274	166		273		262
293	50
283

[truncated: 8 more sheets: Fig 5C stroma area (RecA-GFP), Fig 5D Thylakoid area, Fig 5E Chl mean intensity, Fig 7C NBR1 mutated versions, Fig 8B NBR1 in toc132, Fig 8D NBR1 in tic40 protoplast, Suppl Fig S4 mNBR1 in atg7 , Suppl Fig S5 E3 ligases]
