# Supplementary material for: The autophagy receptor NBR1 directs the clearance of photodamaged chloroplasts
Source: eLife. 2023 Apr 18;12:e86030. doi: 10.7554/eLife.86030 (PMC10156165; doi:10.7554/eLife.86030)
Supplement: Supplementary file 1. — (a) Proteins identified by at least 2 peptide spectral matches.(b) Normalized protein abundances based on the average of two technical replicates or used directly if the proteins were only detected in one technical replicate.(c) Protein abundances expressed as Log2 values.(d) Relative changes of protein abundance between LL and HL conditions in WT plants. Analysis was performed using the Perseus platform 2.0.6.0 (Tyanova et al., 2016), intensity values from MS/MS were log2 imputed and missing values were replaced with random numbers from a Gaussian distribution with a width of 0.3 and a downshift of 1.8. Statistical significance was determined using t-tests. The protein localizations and functions were categorized based on the GO term listed below. GO:0006914 (Autophagy), GO:0000502 (Proteasome), GO:0009507 (Chloroplast), GO:0005739 (Mitochondria), GO:0005777 (Peroxisome), GO:0005840 (Ribosome), GO:0009941 (Chloroplast envelope), GO:0009570 (Chloroplast stroma) and GO:0009534 (Chloroplast thylakoid).(e) Relative changes of protein abundance between LL and HL conditions in the atg7 mutant. Analysis was performed using the Perseus platform 2.0.6.0 (Tyanova et al., 2016), intensity values from MS/MS were log2 imputed and missing values were replaced with random numbers from a Gaussian distribution with a width of 0.3 and a downshift of 1.8. Statistical significance was determined using t-tests. The protein localizations and functions were categorized based on the GO term listed below. GO:0006914 (Autophagy), GO:0000502 (Proteasome), GO:0009507 (Chloroplast), GO:0005739 (Mitochondria), GO:0005777 (Peroxisome), GO:0005840 (Ribosome), GO:0009941 (Chloroplast envelope), GO:0009570 (Chloroplast stroma) and GO:0009534 (Chloroplast thylakoid).(f) Relative changes of protein abundance between LL and HL conditions in the nbr1 mutant. Analysis was performed using the Perseus platform 2.0.6.0 (Tyanova et al., 2016), intensity values from MS/MS were log2 imputed and missing values [file elife-86030-supp1.xlsx]

## Sheet: Suppl. File 1a
Supplemental File1a. Proteins identified by at least 2 peptide spectral matches.
Accession	WT, LL,1-1	WT, LL,1-2	WT, LL,2-1	WT, LL,2-2	WT, LL,3-1	WT, LL,3-2	atg7-2, LL, 1-1	atg7-2, LL, 1-2	atg7-2, LL, 2-1	atg7-2, LL, 2-2	atg7-2, LL, 3-1	atg7-2, LL, 3-2	nbr1, LL, 1-1	nbr1, LL, 1-2	nbr1, LL, 2-1	nbr1, LL, 2-2	nbr1, LL, 3-1	nbr1, LL, 3-2	nbr1 atg7, LL, 1-1	nbr1 atg7, LL, 1-2	nbr1 atg7, LL, 2-1	nbr1 atg7, LL, 2-2	nbr1 atg7, LL, 3-1	nbr1 atg7, LL, 3-2	WT, HL, 1-1	WT, HL, 1-2	WT, HL, 2-1	WT, HL, 2-2	WT, HL, 3-1	WT, HL, 3-2	atg7-2, HL, 1-1	atg7-2, HL, 1-2	atg7-2, HL, 2-1	atg7-2, HL, 2-2	atg7-2, HL, 3-1	atg7-2, HL, 3-2	nbr1, HL, 1-1	nbr1, HL, 1-2	nbr1, HL, 2-1	nbr1, HL, 2-2	nbr1, HL, 3-1	nbr1, HL, 3-2	nbr1 atg7, HL, 1-1	nbr1 atg7, HL, 1-2	nbr1 atg7, HL, 2-1	nbr1 atg7, HL, 2-2	nbr1 atg7, HL, 3-1	nbr1 atg7, HL, 3-2
AT1G01080.2	5.22392e+08	2.12458e+08	1.74058e+08	7.91656e+07	1.7339e+08	1.65619e+08	1.96771e+08	1.78673e+08	1.76297e+08	1.68865e+08	2.04213e+08	2.04766e+08	1.9917e+08	1.85394e+08	1.48088e+08	1.26946e+08	2.31894e+08	2.12867e+08	2.15904e+08	1.70769e+08	2.06469e+08	2.17665e+08	1.88855e+08	1.70604e+08	1.56142e+08	1.38446e+08	1.6545e+08	1.73059e+08	1.79533e+08	1.50816e+08	1.85256e+08	1.56274e+08	210952836	1.83527e+08	1.30482e+08	1.10565e+08	1.58314e+08	174721428	1.26692e+08	1.35716e+08	1.60096e+08	1.32038e+08	2.09616e+08	1.69768e+08	1.54412e+08	1.28389e+08	2.31115e+08	1.60116e+08
AT1G01090.1	9.6791e+08	3.05553e+08	5.63055e+08	2.71518e+08	4.06816e+08	3.29109e+08	3.28366e+08	3.16158e+08	3.42475e+08	3.15132e+08	3.33222e+08	4.38174e+08	4.43964e+08	3.99496e+08	3.73919e+08	3.41793e+08	3.82182e+08	4.03064e+08	3.47739e+08	3.35914e+08	3.36825e+08	3.32729e+08	4.19569e+08	3.75796e+08	3.33294e+08	2.93471e+08	3.09028e+08	3.13053e+08	5.64406e+08	3.64709e+08	3.88945e+08	3.98519e+08	4.34319e+08	2.82605e+08	3.68962e+08	2.61493e+08	3.76442e+08	2.72268e+08	3.64209e+08	3.6818e+08	3.89921e+08	3.51929e+08	3.68584e+08	2.47767e+08	3.86592e+08	3.40874e+08	6.20796e+08	3.61865e+08
AT1G01100.2	5.82705e+06	5.48628e+06	4.1726e+06	3.78414e+06	1.05315e+07	1.12209e+07	5.78622e+06	5.65508e+06	4.9853e+06	5.45673e+06	6.4131e+06	6.4598e+06	9.95518e+06	9.34853e+06	6.03398e+06	5.55887e+06	5.58178e+06	5.7899e+06	6.08869e+06	6.20075e+06	8.71342e+06	9.43672e+06	6.16513e+06	6.41785e+06	7.79823e+06	7.39611e+06	8.97365e+06	8.62673e+06	6.80094e+06	6.57136e+06	9.78239e+06	9.7059e+06	1.26355e+07	1.09457e+07	8.45512e+06	9.40265e+06	1.52605e+07	1.3529e+07	1.08363e+07	9.94812e+06	8.83021e+06	7.02975e+06	1.32752e+07	1.0342e+07	9.20223e+06	7.10227e+06	8.9125e+06	8.3967e+06
AT1G01170.1	24211320	4431222	1.94027e+07	5358026	7.34356e+06	5.87429e+06	11947310	1.10671e+07	1.07449e+07	8.0275e+06	13263670	9940008	7.05255e+06	4725526	9.54363e+06	6.36419e+06	1.50414e+07	10295984	9.80915e+06	8207175	8720605	9150131	17430942	10996918	7.16418e+06	5.36445e+06	6.35378e+06	4.70243e+06	8926871	5.71433e+06	5.79443e+06	4.94249e+06	11197267	9016357	6.52943e+06	5549584	1.20797e+07	5.37474e+06	6.54934e+06	4286927	3.9677e+06	3.09716e+06	1.20114e+07	1.02357e+07	1.13292e+07	1.17943e+07	9514507	5.53339e+06
AT1G01300.1	1.38161e+07	9.68637e+06	6.27462e+06	5.57689e+06	2.26636e+07	22410605	1.1238e+07	1.23189e+07	11915661	1.2592e+07	12559036	14289668	17171784	16849208	13027303	1.05556e+07	10871879	10800096	1.36076e+07	12013447	2.25113e+07	2.21376e+07	13896515	1.22088e+07	6.33592e+06	5832261	11211223	9544777	11026663	10197319	9620217	8902345	14396176	14255667	1.32947e+07	12806650	41751552	14142621	9543483	9372578	7.93212e+06	5.49706e+06	15257090	1.21216e+07	1.33363e+07	11009308	1.76007e+07	6.85958e+06
AT1G01320.1	6.57514e+08	1.99877e+08	3.9802e+08	2.1116e+08	4.20755e+08	4.1333e+08	2.6087e+08	2.72171e+08	3.19644e+08	2.75721e+08	3.16566e+08	3.38042e+08	4.89417e+08	4.30982e+08	3.4162e+08	3.0838e+08	3.19996e+08	3.23813e+08	3.31422e+08	2.87989e+08	3.90135e+08	3.73596e+08	3.77345e+08	3.06114e+08	2.77157e+08	2.54979e+08	4.14997e+08	3.76351e+08	5.2831e+08	3.52641e+08	3.74611e+08	3.38266e+08	4.55294e+08	4.39821e+08	4.61262e+08	4.20578e+08	6.01751e+08	4.91362e+08	4.3223e+08	3.72809e+08	3.5693e+08	2.67656e+08	5.93675e+08	4.65151e+08	4.33309e+08	3.62492e+08	5.56858e+08	3.15572e+08
AT1G01510.1	8.94937e+06	1.02362e+06	1.38929e+06	785820	1.78826e+06	2.12392e+06	3.13606e+06	1.87057e+06	3.22528e+06	1.90159e+06	3.71519e+06	2.62558e+06	5.92762e+06	4.07687e+06	1.46466e+06	2.05292e+06	3.87752e+06	2.13213e+06	2.26717e+06	1.31593e+06	3.30254e+06	2.63641e+06	3.58131e+06	2.19783e+06	1.36087e+06	619921	1.64875e+06	2.30534e+06	9.85463e+06	4.9363e+06	2.41348e+06	3142811	1.73554e+06	3.46983e+06	1.92186e+06	2.20983e+06	3.65331e+06	1.79495e+06	1.83351e+06	888720	1.63001e+06	952837	1.89091e+06	1.94391e+06	1.40694e+06	1.17245e+06	2.55246e+06	1.31237e+06
AT1G01610.1	1.08015e+07	2.79118e+06	2.17633e+07	15537083	8.89035e+06	1.09489e+07	4.99499e+06	5.37948e+06	6.29025e+06	5.373e+06	4.87881e+06	4.95536e+06	8.06542e+06	8.51519e+06	4.10701e+06	3.01121e+06	4.27079e+06	4.16869e+06	6.6056e+06	7.21405e+06	2.12093e+07	8.06919e+06	6.61372e+06	5.99766e+06	3.26098e+06	3.95727e+06	7.10878e+06	6.3475e+06	7.34699e+06	1.96164e+07	8.40359e+06	6.10619e+06	1.87493e+07	1.92291e+07	2.13442e+07	2.34231e+07	1.24588e+07	1.03152e+07	6992158	5.74967e+06	4.47818e+06	2.86172e+06	2.2117e+07	1.60432e+07	1.50375e+07	4.9679e+06	7.7101e+06	4.78767e+06
AT1G01620.1	1.48891e+06	2152.55	11017190	481451	7081.09	4133.85								13806.1			381634	566587	6893.62				27504.9		475249		4338.92		2.04789e+06	579481		6260.57	384712		544415	1887.02					920212	650335	5024.14			406478
AT1G01630.1	21746700	9316265	12398743	12083381	1.21093e+07	1.52137e+07	1.61999e+07	1.36182e+07	16858858	14905080	13763236	13292719	2.06732e+07	19337968	2.11504e+07	13757185	13192759	12092943	16567200	13879044	1.18219e+07	1.42958e+07	1.45911e+07	11821836	11493466	8764206	1.30314e+07	1.25343e+07	1.41005e+07	8423081	1.34053e+07	1.27885e+07	1.4657e+07	1.63685e+07	1.80823e+07	1.57566e+07	1.0166e+07	1.46982e+07	1.61162e+07	1.293e+07	1.57861e+07	1.40793e+07	1.93369e+07	1.69464e+07	1.41558e+07	10341805	1.53639e+07	1.07631e+07
AT1G01710.1	564122	1.65495e+06	878964	953810	3.16912e+06	3.4801e+06	1.98059e+06	2.07085e+06	2.07903e+06	2.17844e+06	2.39755e+06	2.63237e+06	1.27856e+06	2.33286e+06	1.37196e+06	1.18016e+06	1.79911e+06	2.08257e+06	2.87789e+06	2.90603e+06	4.27062e+06	4.56718e+06	2.81577e+06	2.54781e+06	1.95972e+06	2.03603e+06	2.09111e+06	2.08257e+06	841699	839618	4.58091e+06	4.34789e+06	6.54937e+06	5.58032e+06	4.67681e+06	4.0607e+06	3.59147e+06	3.64564e+06	2.17901e+06	2.14068e+06	776372	1.16612e+06	6.17897e+06	3.9574e+06	3.97395e+06	2.80787e+06	4.38463e+06	3.20604e+06
AT1G01750.1	961877	1.23397e+06	410092	500699	3.0404e+06	2930885	1222296	1.42012e+06	1.14041e+06	1.06847e+06	1.58051e+06	1.75822e+06	2963013	2.82212e+06	1.33341e+06	1057553	1.99316e+06	1.70852e+06	1.58972e+06	1.61862e+06	3.25929e+06	3523493	1791654	1.69931e+06	1.05707e+06	1.0403e+06	2.17038e+06	1.9846e+06	2.23201e+06	1.95218e+06	1.61488e+06	1.53157e+06	2.59572e+06	2.08785e+06	1.60765e+06	1.81158e+06	5.21463e+06	3.61828e+06	2.53534e+06	1.71239e+06	1.61492e+06	976107	3286272	2.2039e+06	1533307	1.0194e+06	1.56832e+06	1.50312e+06
AT1G01790.2	7.76148e+07	2.69224e+07	5.00814e+07	2.08699e+07	3.50431e+07	3.09735e+07	1.8248e+07	1.54102e+07	1.01579e+07	1.71914e+07	7.54557e+06	2.86249e+07	2.41801e+07	1.72056e+07	1.88007e+07	1.96136e+07	1.40061e+07	1.41278e+07	2.00268e+07	1.14559e+07	7.60557e+06	2.72455e+07	2.15756e+07	1.51243e+07	5.0024e+07	3.21473e+07	1.11853e+07	2.99911e+07	6.72545e+07	4.11998e+07	1.92532e+07	3.25255e+07	1.62147e+07	4.1715e+07	5.26271e+07	4.23409e+07	9.92902e+06	8.02337e+06	1.22159e+07	2.86463e+07	1.09281e+07	8.37173e+06	1.35811e+07	1.09082e+07	1.06915e+07	3.33346e+07	1.41675e+07	1.79027e+07
AT1G01800.1	1.38306e+08	8.13963e+07	1.10943e+08	6.70323e+07	7.19756e+07	5.923e+07	8.76329e+07	8.29331e+07	9.54004e+07	7.64322e+07	7.48288e+07	8.34854e+07	9.21692e+07	7.59985e+07	6.41215e+07	6.88518e+07	6.85681e+07	6.65762e+07	9.93484e+07	8.47603e+07	8.62479e+07	8.80182e+07	1.00547e+08	7.43936e+07	1.27863e+08	1.1964e+08	6.39559e+07	1.2263e+08	1.54753e+08	1.25289e+08	6.40273e+07	6.04842e+07	78286803	7.06977e+07	5.83215e+07	5.35244e+07	8.75702e+07	6.7817e+07	5.1392e+07	5.34106e+07	4.7793e+07	3.95855e+07	78824514	6.48244e+07	7.86215e+07	59788936	1.40898e+08	9.48683e+07
AT1G01910.4	1.02835e+08	3.52817e+07	4.93872e+07	3.15604e+07	8.28169e+07	8.53879e+07	57036382	5.94553e+07	6.26619e+07	6.15175e+07	7.11742e+07	8.35652e+07	77137043	7.01565e+07	6.88985e+07	5.65212e+07	5.54272e+07	5.26929e+07	7.15601e+07	6.2319e+07	9.21039e+07	84756581	8.30459e+07	6.79294e+07	5.11217e+07	47318404	81393469	6.22915e+07	7.89149e+07	6.70709e+07	90074684	8.91496e+07	119092889	120988280	9.70868e+07	9.0049e+07	125722556	1.11562e+08	8.59438e+07	7.30197e+07	8.66285e+07	5.63332e+07	143093676	1.19668e+08	99477526	8.41651e+07	112296835	70611788
AT1G01960.1	9.16755e+07	3.93817e+07	5.04196e+07	3.64583e+07	8.44589e+07	7.61891e+07	5.64537e+07	6.41008e+07	6.39551e+07	5.76415e+07	6.82462e+07	7.26484e+07	5.42585e+07	7.73755e+07	6.53429e+07	6.60415e+07	6.47936e+07	6.54323e+07	6.74123e+07	5.91153e+07	6.83885e+07	6.26965e+07	5.57371e+07	4.89151e+07	7.03997e+07	6.34991e+07	7.27366e+07	6.93617e+07	7.8431e+07	7.13418e+07	7.53223e+07	7.75781e+07	9.08853e+07	9.39782e+07	1.01114e+08	9.70907e+07	1.30118e+08	1.03342e+08	8.93472e+07	7.84415e+07	7.00224e+07	5.18169e+07	1.37091e+08	1.03273e+08	1.00851e+08	7.38743e+07	9.79763e+07	69936020
AT1G02080.1	2.20867e+07	8.10319e+06	1.749e+07	1.30513e+07	3.0526e+07	3.11625e+07	1.94975e+07	1.9193e+07	2.10919e+07	1.76977e+07	2.34654e+07	2.71084e+07	3.38423e+07	3.30148e+07	2.38983e+07	1.90471e+07	1.37539e+07	1.32852e+07	1.71809e+07	1.25684e+07	2.40963e+07	2.45923e+07	2.43112e+07	1.41731e+07	2.21199e+07	1.69329e+07	3.49847e+07	2.81689e+07	2.83269e+07	2.57532e+07	2.95837e+07	1.98186e+07	3.56539e+07	3.408e+07	2.43264e+07	2.52812e+07	4.36992e+07	4.58345e+07	2.87165e+07	3.01021e+07	2.16705e+07	1.23718e+07	4.72115e+07	3.7048e+07	2.96882e+07	2.78937e+07	3.96362e+07	2.07715e+07
AT1G02090.1	14225807	1.01748e+07	1.60033e+07	1.28424e+07	39158609	3.99931e+07	18272662	2.02005e+07	2.15088e+07	22138978	1.88122e+07	2.72484e+07	3.47144e+07	35658218	2.61675e+07	2.09583e+07	2.07257e+07	1.34682e+07	2.14126e+07	2.08636e+07	3.18688e+07	3.2353e+07	2.42377e+07	1.53525e+07	1.83512e+07	1.75099e+07	2.62762e+07	2.763e+07	26721732	26275117	3.60811e+07	2.42378e+07	3.03463e+07	3.52748e+07	2.74625e+07	2.77104e+07	3.9955e+07	3.85194e+07	2.56647e+07	2.88244e+07	2.28858e+07	1.54835e+07	3.87367e+07	3.44034e+07	25519773	2.53122e+07	4.40774e+07	2.68938e+07
AT1G02100.3	4.60976e+06	4546908	5.05578e+06	5.46935e+06	14843991	15520424	8038341	9180370	9538882	9.62658e+06	10582405	1.36025e+07	15498830	1.39695e+07	9.78018e+06	7.97033e+06	6.28517e+06	6.2396e+06	1.16561e+07	1.03874e+07	1.64219e+07	16774226	1.15796e+07	6.64974e+06	1.01259e+07	9.39568e+06	18322322	16213796	1.30883e+07	14582671	15759959	1.21787e+07	2.47477e+07	25195736	1.00807e+07	1.25188e+07	18907320	2.00478e+07	12942343	13492232	9398376	6.96513e+06	2.38992e+07	1.87787e+07	16232535	14966961	1.66286e+07	1.01536e+07
AT1G02130.1	3.52288e+07	4.10279e+06	1.53788e+07	3.43606e+06	1.46324e+07	1.37861e+07	9.97645e+06	8.03116e+06	1.2578e+07	8.15507e+06	1.67165e+07	1.2976e+07	8.32578e+06	5.11253e+06	9.77199e+06	4.42524e+06	1.07972e+07	6.25192e+06	1.52226e+07	6.91661e+06	1.81848e+07	1.47056e+07	2.07001e+07	1.47365e+07	3.35221e+06	172209	7.93429e+06	3.4828e+06	6.77615e+06	295718	1.31537e+07	1.10038e+07	1.64414e+07	1.50777e+07	1.83873e+07	1.4438e+07	2.8281e+07	9.60594e+06	7.16242e+06	5.8511e+06	1.44351e+07	7.53565e+06	1.8601e+07	1.51276e+07	1.47282e+07	10884359	2.4204e+07	6.82843e+06
AT1G02140.1	5.86122e+07	1.65649e+07	2.97254e+07	1.22539e+07	3.68922e+07	3.70124e+07	1.37025e+07	2.27888e+07	1.94406e+07	2.20151e+07	1.98881e+07	2.6942e+07	3.53455e+07	3.27701e+07	2.48261e+07	2.79512e+07	18817701	2.34438e+07	3.14007e+07	2.19966e+07	2.82137e+07	2.42702e+07	2.88836e+07	2.72799e+07	2.59142e+07	1.67359e+07	2.74657e+07	2.44392e+07	3.44474e+07	2.68746e+07	3.75763e+07	3.38578e+07	4.52419e+07	3.1826e+07	49254985	3.40651e+07	4.33332e+07	3.17486e+07	3.79236e+07	3.26445e+07	3.98421e+07	3.00745e+07	4.58757e+07	3.1324e+07	2.66109e+07	1.84065e+07	4.96953e+07	2.96073e+07
AT1G02150.1	1.84453e+08	6.02982e+07	8.84309e+07	3.73878e+07	1.63871e+08	1.48078e+08	7.1758e+07	6.84036e+07	8.19478e+07	6.82143e+07	8.11182e+07	1.14648e+08	1.47709e+08	1.90363e+08	9.47284e+07	1.40707e+08	1.03857e+08	7.96068e+07	8.73257e+07	7.76478e+07	1.25762e+08	1.10683e+08	9.04674e+07	1.17553e+08	6.04333e+07	5.70979e+07	1.3096e+08	9.18237e+07	8.59323e+07	8.06741e+07	1.63641e+08	1.41401e+08	1.93667e+08	1.46734e+08	1.49505e+08	1.23558e+08	1.89304e+08	1.52296e+08	1.25484e+08	1.31201e+08	1.32164e+08	1.0199e+08	2.03364e+08	1.2076e+08	1.26589e+08	1.05915e+08	1.59132e+08	8.24139e+07
AT1G02280.2	6.4847e+07	3.21116e+07	1.05521e+07	1.62501e+07	7.23352e+07	7.18433e+07	31686294	4.47842e+07	4.15954e+07	3.97895e+07	3.34346e+07	3.09396e+07	9.53889e+07	8.44698e+07	3.60505e+07	3.5549e+07	3.45134e+07	5.73354e+07	4.35289e+07	4.24979e+07	5.34899e+07	5.27944e+07	3.77134e+07	5.04988e+07	3.97526e+07	3.5487e+07	5.44266e+07	5.56328e+07	8.17724e+07	8.0111e+07	4.82976e+07	4.42466e+07	7.82442e+07	6.76168e+07	6.25894e+07	5.74358e+07	8.79107e+07	8.08753e+07	5.47751e+07	52655088	4.92865e+07	2.85616e+07	1.03559e+08	7.72652e+07	5.26238e+07	4.11033e+07	5.93328e+07	4.40692e+07
AT1G02305.1	2.11395e+06	1.31214e+06	3.91445e+06			2546.77	1398661			10463.9	4746.77					9466.88				9724.32	69497.8	8213.98					3215.73	20114			13973.4			2597.66				6992.01	6741.45				41819.5		8319.51
AT1G02500.1	5.20405e+09	2.32164e+09	3.911e+09	2.32733e+09	3.98235e+09	3.85017e+09	3.13235e+09	3.0508e+09	3.37439e+09	3.05719e+09	3.78294e+09	3.94932e+09	3.80552e+09	3.57089e+09	3.41762e+09	2.98209e+09	2.96467e+09	2.65679e+09	3.77929e+09	3.31983e+09	3.96388e+09	3.77857e+09	4.28673e+09	3.22564e+09	2.6802e+09	2.5757e+09	3.04851e+09	2.83824e+09	3.88483e+09	3.09529e+09	3.17573e+09	3.11221e+09	3.49354e+09	3.68969e+09	3.55429e+09	3.36138e+09	2.32265e+09	2.2555e+09	3.3194e+09	3.13473e+09	3.3693e+09	2.53303e+09	4.31597e+09	4.06753e+09	3.81449e+09	3.39355e+09	5.3612e+09	3.42579e+09
AT1G02560.1	1.09846e+08	5.38335e+07	9.16352e+07	5.43617e+07	8.33734e+07	8.63461e+07	5.13966e+07	4.93531e+07	5.31552e+07	4.86352e+07	5.14108e+07	5.66223e+07	8.49344e+07	7.2133e+07	6.27818e+07	5.24874e+07	5.45291e+07	4.60087e+07	5.44006e+07	5.2077e+07	6.42144e+07	6.26714e+07	5.89153e+07	4.98297e+07	6.68544e+07	5.91e+07	6.97288e+07	6.0436e+07	1.05034e+08	6.86244e+07	6.72001e+07	6.33833e+07	7.68788e+07	6.90277e+07	6.49815e+07	6.31772e+07	1.1541e+08	8.26644e+07	7.42034e+07	6.44827e+07	7.31716e+07	5.69481e+07	8.01259e+07	5.72972e+07	6.49921e+07	4.67871e+07	1.09897e+08	6.55023e+07
AT1G02690.2	1.37065e+06	565285	489911	311421	3.44856e+06	3.18904e+06	606976	813749	820911	709612	1.17247e+06	1.25013e+06	3.02691e+06	2.73908e+06	1.07024e+06	977176	1.08782e+06	1.2863e+06	987691	1.19054e+06	1.61307e+06	1.89896e+06	1.05665e+06	745629	1.27524e+06	1.07003e+06	2.84862e+06	1.93989e+06	1.4796e+06	1.40847e+06	2.55503e+06	2.06618e+06	3.45327e+06	2.65433e+06	3.05359e+06	2.01919e+06	4.58402e+06	4.78077e+06	3.1121e+06	2.46452e+06	1.75964e+06	826942	4.37434e+06	2.57165e+06	2.00177e+06	1.12191e+06	1.78246e+06	1.45949e+06
AT1G02780.1	8.42038e+08	2.99132e+08	7.85068e+08	4.4295e+08	4.76898e+07	4.42637e+07	2.07989e+08	1.58832e+08	1.65615e+08	1.09533e+08	9.71149e+07	7.35914e+07	1.56508e+08	8.0761e+07	1.19393e+08	1.29568e+08	5.71644e+07	1.28136e+08	1.70567e+08	1.23772e+08	5.06939e+07	5.73623e+07	1.80913e+08	8.78074e+07	3.86141e+08	3.58085e+08	5.97718e+07	2.02979e+08	2.98288e+08	3.08645e+08	6.71415e+07	5.69076e+07	7.68689e+07	5.18348e+07	6.88865e+07	3.48397e+07	3.12081e+07	3.28712e+07	6.05177e+07	5.7679e+07	5.54636e+07	3.17724e+07	5.89243e+07	5.36235e+07	6.824e+07	5.09462e+07	2.65982e+08	1.79749e+08
AT1G02840.1	33657861	2.21851e+07	1.2453e+07	1.32691e+07	2.99403e+07	3.72961e+07	16953100	2.21123e+07	2.41825e+07	1.74791e+07	2.12845e+07	2.32847e+07	30766967	2.79668e+07	2.18369e+07	2.25555e+07	20094459	2.21986e+07	2.50637e+07	21630915	27138164	2.41675e+07	2.39058e+07	2.14551e+07	15932828	1.23603e+07	1.83396e+07	1.75558e+07	2.36366e+07	1.91936e+07	1.95143e+07	1.91736e+07	2.14836e+07	2.35711e+07	1.65853e+07	1.51087e+07	2.48937e+07	28221526	16685981	1.69534e+07	1.69607e+07	9.00562e+06	2.49458e+07	1.93545e+07	2.29969e+07	1.91835e+07	2.80269e+07	1.33219e+07
AT1G02880.6	1.58964e+07	8.86391e+06	1.12565e+07	6.4897e+06	2.07708e+07	2.4675e+07	9.98946e+06	1.55498e+07	17638873	1.58595e+07	1.69538e+07	1.77543e+07	2.35594e+07	2.65804e+07	1.79815e+07	1.50995e+07	1.25071e+07	1.14819e+07	2.36309e+07	1.91867e+07	2.95037e+07	2.8971e+07	2.19832e+07	1.56346e+07	1.44072e+07	7.89587e+06	1.39876e+07	1.77227e+07	2.87813e+07	21523686	26621114	2.14956e+07	3.11481e+07	2.78875e+07	1.09804e+07	22310207	1.72971e+07	3.14733e+07	1.0872e+07	18364331	9.93302e+06	1.44086e+07	3.1644e+07	20841439	2.2011e+07	1.65249e+07	3.71298e+07	16509618
AT1G02930.1	1.35263e+08	5.70769e+07	7.01965e+07	5.64061e+07	1.46504e+08	1.46361e+08	1.66095e+08	1.88513e+08	1.48025e+08	1.39131e+08	2.11614e+08	2.66554e+08	1.46776e+08	1.2645e+08	9.74997e+07	1.01219e+08	7.25598e+07	7.78295e+07	2.38366e+08	2.18522e+08	3.05379e+08	307738199	3.01925e+08	2.13975e+08	1.21994e+08	9.92254e+07	1.17946e+08	1.06451e+08	1.66924e+08	1.35595e+08	2.15296e+08	1.93203e+08	3.05132e+08	2.58338e+08	2.52444e+08	2.37803e+08	2.37659e+08	2.04157e+08	1.87247e+08	1.77133e+08	1.15813e+08	7.12731e+07	4.03809e+08	2.93736e+08	2.81763e+08	2.41897e+08	4.89653e+08	2.95208e+08
AT1G03030.1	1.46323e+07	8.21828e+06	8.1144e+06	6.85937e+06	1.21539e+07	6.41767e+06	8.01242e+06	7.74476e+06	1.11696e+07	1.06977e+07	9.84524e+06	1.23168e+07	1.53138e+07	1.88711e+07	8.87455e+06	1.19386e+07	9.78393e+06	7.24811e+06	1.29659e+07	12730594	1.15356e+07	9.91334e+06	1.28617e+07	1.08326e+07	1.28773e+07	1.13094e+07	7.81641e+06	1.24084e+07	1.1812e+07	1.07678e+07	1.59359e+07	1.30063e+07	1.3446e+07	7855120	8.71831e+06	5.98257e+06	1.05343e+07	8.47723e+06	8.73829e+06	1.17856e+07	11042054	1.12447e+07	8.03921e+06	7.49589e+06	10490814	1.09044e+07	1.0648e+07	9.38507e+06
AT1G03160.1	1.3102e+06	766860	347170	862871	3030431	3.5216e+06	1.04422e+06	1.37466e+06	1.90712e+06	1.13609e+06	1.33629e+06	1.58055e+06	4.54072e+06	3.42966e+06	1.09076e+06	2.00735e+06	1058641	1.25676e+06	1.75081e+06	1.86203e+06	2344648	2.67689e+06	1.40134e+06	1.41594e+06	1.8132e+06	903835	1.84698e+06	1.65417e+06	2.95731e+06	3.5096e+06	2.78258e+06	1900140	3.47226e+06	4.49702e+06	2.80227e+06	2.01241e+06	7581388	4.58508e+06	1.99697e+06	2956106	1.86393e+06	1.02e+06	5060329	3.19492e+06	1890724	1.11149e+06	2.3597e+06	1.18708e+06
AT1G03220.1	3.74254e+08	1.99127e+08	2.11217e+08	1.67372e+08	4.63293e+08	4.66017e+08	390316846	4.49775e+08	4.75069e+08	4.54359e+08	3.58586e+08	5.32404e+08	516611000	4.6057e+08	3.06957e+08	2.93176e+08	3.01895e+08	3.2432e+08	5.16744e+08	5.1981e+08	6.33211e+08	6.3486e+08	5.33949e+08	3.85723e+08	3.05256e+08	2.86793e+08	5.25045e+08	4.40503e+08	5.51414e+08	4.51478e+08	5.62687e+08	4.48003e+08	7.73938e+08	7.32176e+08	5.62573e+08	541452823	6.09255e+08	5.40849e+08	4.03137e+08	3.72994e+08	3.08002e+08	2.03411e+08	7.32535e+08	5.29435e+08	6.01724e+08	4.97675e+08	6.30638e+08	3.93582e+08
AT1G03230.1	8.01034e+07	5.3715e+07	6.23536e+07	5.26638e+07	1.64824e+08	165966604	8.92411e+07	9.64554e+07	1.02874e+08	9.34632e+07	9.92786e+07	1.19915e+08	1.68708e+08	1.4761e+08	1.02663e+08	9.84653e+07	8.40654e+07	8.56956e+07	1.30926e+08	1.25349e+08	1.85743e+08	1.86233e+08	1.24942e+08	8.91497e+07	9.3755e+07	8.88159e+07	1.46396e+08	132314177	1.4748e+08	1.35098e+08	1.32383e+08	1.11257e+08	1.73898e+08	1.63849e+08	141690029	1.27895e+08	1.95644e+08	1.64449e+08	1.28901e+08	1.29387e+08	1.08392e+08	7.28462e+07	1.94559e+08	1.40966e+08	1.51561e+08	1.2611e+08	1.79456e+08	1.161e+08
AT1G03330.1	3.20058e+07	2.08504e+07	35546654	2.63139e+07	7.09208e+07	7.44823e+07	3.2343e+07	3.21023e+07	3.96762e+07	3.76831e+07	4.29191e+07	4.7668e+07	6.65819e+07	6.60047e+07	4.59668e+07	3.87565e+07	3.83092e+07	3.91246e+07	4.71626e+07	4.12667e+07	6.78063e+07	6.49787e+07	4.46074e+07	3.6641e+07	3.15171e+07	3.11844e+07	4.58805e+07	4.21337e+07	4.94859e+07	4.61106e+07	5.02666e+07	4.53867e+07	6.14746e+07	5.5405e+07	5.60163e+07	5.51747e+07	8.07423e+07	6.80235e+07	4.73549e+07	4.37149e+07	4.2858e+07	2.52417e+07	6.92567e+07	5.09448e+07	4.66195e+07	3.66171e+07	7.40653e+07	4.57706e+07
AT1G03475.1	921843406	4.38635e+08	6.1628e+08	4.33179e+08	8.80063e+08	8.65756e+08	4.46016e+08	4.35726e+08	5.23921e+08	4.06675e+08	4.8599e+08	5.08959e+08	8.16117e+08	7.30837e+08	5.65472e+08	5.07171e+08	5.02434e+08	4.83744e+08	5.41801e+08	4.73714e+08	6.99013e+08	6.7195e+08	5.29199e+08	4.42076e+08	5.61216e+08	5.25206e+08	6.13284e+08	5.43976e+08	7.62315e+08	6.11037e+08	6.09169e+08	5.60066e+08	7.00451e+08	6.51453e+08	6.37905e+08	5.76334e+08	9.90115e+08	8.31021e+08	5.99075e+08	5.26313e+08	6.49811e+08	4.23115e+08	6.74389e+08	4.86955e+08	5.16793e+08	4.40263e+08	9.1304e+08	5.18466e+08
AT1G03600.1	1.37346e+08	5.35382e+07	7.51651e+07	4.23237e+07	103583263	3.76203e+07	6.06063e+07	5.82636e+07	7.32106e+07	5.26271e+07	6.11972e+07	5.23613e+07	1.03368e+08	8.90819e+07	5.81361e+07	5.10633e+07	6.49008e+07	5.72008e+07	7.63988e+07	5.99648e+07	9.1038e+07	9.21421e+07	8.35996e+07	7.21376e+07	6.97294e+07	5.96654e+07	6.6713e+07	5.97097e+07	1.05613e+08	7.34675e+07	7.40308e+07	6.94188e+07	9.42187e+07	8.57353e+07	7.29128e+07	6.46882e+07	1.0031e+08	7.41809e+07	6.06709e+07	5.41595e+07	8.35654e+07	5.93135e+07	9.19248e+07	6.74186e+07	6.89332e+07	5.32687e+07	1.032e+08	4.91994e+07
AT1G03630.1	2.49543e+08	1.26663e+08	1.42071e+08	8.95842e+07	2.37474e+08	2.53353e+08	1.53042e+08	1.56756e+08	1.52948e+08	1.42177e+08	1.31736e+08	1.60022e+08	2.92583e+08	2.57356e+08	1.55535e+08	1.54663e+08	1.38724e+08	1.39233e+08	1.71713e+08	1.27672e+08	1.89231e+08	1.92256e+08	1.76781e+08	1.41733e+08	1.30506e+08	1.30416e+08	1.56718e+08	1.54006e+08	1.61664e+08	1.56654e+08	1.53189e+08	1.32531e+08	1.90128e+08	1.57951e+08	1.24036e+08	1.04309e+08	2.49022e+08	1.95453e+08	1.524e+08	1.38455e+08	1.83614e+08	1.3526e+08	203574855	1.78455e+08	1.34204e+08	1.07378e+08	1.29655e+08	1.12537e+08
AT1G03680.1	6.794e+08	3.09687e+08	4.93727e+08	3.10867e+08	4.93798e+08	4.70084e+08	3.59219e+08	3.82429e+08	3.68954e+08	3.13663e+08	3.06567e+08	3.7541e+08	6.7426e+08	5.89943e+08	3.80427e+08	3.68801e+08	3.65518e+08	3.88913e+08	4.27666e+08	3.96403e+08	4.35e+08	4.90082e+08	3.99815e+08	3.46857e+08	3.95735e+08	3.58099e+08	4.91568e+08	4.69293e+08	5.97674e+08	5.00213e+08	4.48998e+08	4.11796e+08	4.97286e+08	4.78598e+08	3.81704e+08	3.62834e+08	6.38018e+08	6.09257e+08	4.51283e+08	4.30237e+08	3.39993e+08	2.82488e+08	5.04428e+08	4.28809e+08	4.55763e+08	4.00611e+08	5.3059e+08	3.29516e+08
AT1G03860.1	1.79678e+08	5.24024e+07	1.1463e+08	6.21102e+07	9.764e+07	9.76868e+07	7.55556e+07	7.46083e+07	8.00792e+07	7.0705e+07	9.21301e+07	9.24712e+07	8.12955e+07	6.85177e+07	7.68729e+07	6.23251e+07	8.27715e+07	6.68009e+07	8.65181e+07	7.91059e+07	1.00075e+08	9.75564e+07	9.7556e+07	7.50872e+07	9.68265e+07	8.25254e+07	1.11695e+08	8.33525e+07	1.26503e+08	8.6365e+07	1.12592e+08	9.82656e+07	1.3942e+08	1.29016e+08	1.28378e+08	1.27029e+08	1.75245e+08	1.13592e+08	1.12109e+08	1.00391e+08	1.10571e+08	8.31688e+07	1.78471e+08	1.57714e+08	1.27508e+08	1.1155e+08	1.69143e+08	9.95566e+07
AT1G03870.1	832102	883866	598711	555364	2.88329e+06	3.18689e+06	636547	823901	662159	273159	727485	873352	1.85577e+06	1.78306e+06	1.38855e+06	1.05748e+06	831858	957782	1.00033e+06	1.04194e+06	1.55651e+06	1.79398e+06	1.12408e+06	977330	1.52559e+06	1.48395e+06	1.97831e+06	1.76824e+06	1.38441e+06	1.09541e+06	1586815	1.64444e+06	2.35996e+06	1.9052e+06	1.40566e+06	1559774	2.72234e+06	2557901	2.46659e+06	1.96974e+06	1.39692e+06	927606	2.4075e+06	1.45103e+06	1.76862e+06	1.4464e+06	1.60649e+06	1.33484e+06
AT1G04080.3	7.30217e+07	2.88342e+07	4.21056e+07	2.84098e+07	5.45383e+07	5.14821e+07	4.57644e+07	3.11759e+07	4.69032e+07	3.80179e+07	3.27805e+07	6.5252e+07	7.33238e+07	6.36957e+07	6.08711e+07	4.03945e+07	4.01173e+07	2.93725e+07	3.94438e+07	2.95389e+07	3.76613e+07	46622592	3.60723e+07	3.39446e+07	5.58018e+07	4.48376e+07	5.71121e+07	5.53271e+07	107043565	6.46384e+07	4.49366e+07	4.68389e+07	5.31345e+07	6.54013e+07	6.22437e+07	5.74103e+07	2.35658e+07	2.53004e+07	6.57027e+07	5.76453e+07	5.45046e+07	4.21979e+07	7.55376e+07	6.08283e+07	5.13503e+07	4.16449e+07	7.34944e+07	5.74032e+07
AT1G04170.2	1.49046e+08	6.57414e+07	8.70318e+07	7.42368e+07	1.84161e+08	1.7495e+08	9.25677e+07	9.86898e+07	1.05225e+08	9.33197e+07	1.2711e+08	1.17381e+08	1.45063e+08	1.35643e+08	1.21098e+08	8.38611e+07	7.92054e+07	7.03889e+07	1.12885e+08	1.01566e+08	1.61208e+08	1.31397e+08	1.14408e+08	8.55832e+07	8.66795e+07	7.2347e+07	1.6003e+08	1.04588e+08	1.46219e+08	1.22492e+08	1.40083e+08	1.14789e+08	1.46243e+08	1.7369e+08	1.57713e+08	1.46026e+08	1.97402e+08	1.54848e+08	1.30487e+08	1.40613e+08	1.39815e+08	88640478	1.58721e+08	1.39765e+08	1.407e+08	1.15435e+08	2.20617e+08	1.28572e+08
AT1G04190.1	7722123	1663930	4.28071e+06	2.02974e+06	786154		5.38526e+06	4.68227e+06	5.48909e+06	3.99289e+06	6.81111e+06	6.11912e+06	5359588	3389676	5118803	4.42216e+06	4.22919e+06	3.91174e+06	4.61886e+06	3.07024e+06	2.8793e+06	5.14773e+06	5.60864e+06	4.6676e+06	2.67752e+06	3.46788e+06	3553115	2.9409e+06	5.16951e+06	3.91291e+06	3.36884e+06	2719961	4.26517e+06	3.84219e+06	4.99403e+06	3.19329e+06			3559933	3.51694e+06	4.03698e+06	2.68153e+06	4.61431e+06	5.13823e+06	4505334	5.45744e+06	8548994	4270105
AT1G04270.1	5.54242e+07	3.47833e+07	2.05906e+07	2.17576e+07	7.07095e+07	7.48192e+07	4.00734e+07	4.49774e+07	4.78819e+07	3.68129e+07	5.18056e+07	5.60515e+07	7.83974e+07	7.12054e+07	4.69744e+07	4.61393e+07	4.91815e+07	4.84088e+07	5.97469e+07	5.5885e+07	6.53471e+07	6.10028e+07	5.71399e+07	4.92078e+07	5.03869e+07	4.0874e+07	7.24657e+07	6.20122e+07	6.81578e+07	6.68609e+07	6.91854e+07	63441115	8.30149e+07	7.33914e+07	7.18122e+07	6.76937e+07	1.0784e+08	9.51565e+07	7.28908e+07	6.46695e+07	4.85933e+07	3.25558e+07	9.0623e+07	6.98807e+07	6.98611e+07	5.37133e+07	83295321	5.47961e+07
AT1G04350.1	656359		1.23344e+06	769429	1430212	680619	1514518	1.02022e+06	679970		1.75785e+06	461646	1.75147e+06		1.35714e+06	545707	1.37721e+06	598293	647177	359991	650016		1.312e+06	589165	246176		388501	285099			186630										587397	282532	206395		221257	200014
AT1G04410.1	4.79706e+09	1.98168e+09	3.41176e+09	1.9092e+09	3.4722e+09	2.99845e+09	3.212e+09	2.98808e+09	2.98378e+09	2.77183e+09	6.80897e+09	3.52909e+09	3.49819e+09	3.09168e+09	2.73864e+09	2.31414e+09	7.75113e+09	2.34501e+09	3.69502e+09	6.8335e+09	4.20876e+09	4.19192e+09	3.66542e+09	3.13056e+09	2.51161e+09	2.44212e+09	6.53152e+09	2.6412e+09	4.23126e+09	6.27963e+09	5.6648e+09	2.88797e+09	6.33019e+09	4.00396e+09	3.63771e+09	3.34292e+09	7.82469e+09	6.8098e+09	5.53182e+09	4.95198e+09	5.3808e+09	4.28158e+09	4.76178e+09	3.99287e+09	4.10586e+09	3.6296e+09	5.32036e+09	3.45695e+09
AT1G04420.1	1.41114e+08	6.35424e+07	8.1963e+07	5.82137e+07	1.57801e+08	1.49352e+08	7.58602e+07	7.20191e+07	8.63244e+07	6.91213e+07	8.48102e+07	9.18383e+07	1.42158e+08	1.27305e+08	1.05684e+08	9.73384e+07	9.90671e+07	9.44194e+07	9.28762e+07	9.18756e+07	1.33709e+08	1.15663e+08	9.4886e+07	7.88262e+07	7.81332e+07	7.20689e+07	1.16856e+08	1.02112e+08	1.32881e+08	1.04649e+08	9.71312e+07	1.05793e+08	1.26919e+08	1.15932e+08	1.22066e+08	1.08174e+08	2.13892e+08	1.64519e+08	1.40001e+08	1.05336e+08	1.2638e+08	8.80868e+07	1.37281e+08	1.01125e+08	1.07158e+08	7.97913e+07	1.43335e+08	8.15188e+07
AT1G04430.1	1.25881e+08	7.68825e+07	8.11918e+07	6.2802e+07	210005679	2.05342e+08	1.15013e+08	1.19855e+08	1.39657e+08	1.17915e+08	125681224	1.39125e+08	2.03562e+08	1.79941e+08	1.26988e+08	1.06145e+08	1.00285e+08	1.07824e+08	1.50276e+08	1.31093e+08	2.00681e+08	2.01315e+08	1.70915e+08	129699252	1.09831e+08	1.00631e+08	1.38848e+08	1.23287e+08	1.68131e+08	144276194	1.59536e+08	1.41238e+08	2.16943e+08	2.09102e+08	1.72773e+08	1.65743e+08	2.1983e+08	1.93699e+08	1.3931e+08	129895900	1.37953e+08	91104716	2.62039e+08	1.91644e+08	1.67572e+08	1.31208e+08	2.136e+08	1.34027e+08
AT1G04510.1	7.41842e+07	2.80661e+07	5.13141e+07	2.642e+07	4.24101e+07	4.95199e+07	26127418	2.54678e+07	33248548	3.51196e+07	3.34823e+07	3.92068e+07	61033068	6.05014e+07	42357301	3.85278e+07	3.61287e+07	34087448	3.39604e+07	34010738	3.38427e+07	3.36187e+07	41436618	3.02337e+07	3.95601e+07	31143463	38557292	4.27541e+07	70364010	4.67062e+07	54506294	4.88712e+07	45506036	4.27225e+07	4.24215e+07	3.47688e+07	1.0428e+07	49416571	4.93555e+07	4.96644e+07	5.25035e+07	42838361	4.69617e+07	4.61995e+07	4.25183e+07	34915784	4.77674e+07	33800150
AT1G04530.1	4.47816e+07	8.09666e+06	1.9182e+07	7.05265e+06	1.16325e+07	1.71852e+07	1.18399e+07	1.41127e+07	1.71267e+07	1.76112e+07	1.39941e+07	19632537	2.24356e+07	1.9594e+07	2.05241e+07	1.32823e+07	16552628	1.92268e+07	1.62813e+07	14823296	1.3992e+07	2.02714e+07	2.23702e+07	1.68939e+07	8.40366e+06	8.14897e+06	1.29678e+07	1.09158e+07	2.37514e+07	1.18993e+07	1.58909e+07	1.41409e+07	1.68272e+07	1.95988e+07	20085691	1.99963e+07	1.07029e+07	2.14319e+07	1.48188e+07	1.17781e+07	1.50038e+07	13651154	2.31295e+07	1.57164e+07	1.89788e+07	1.43797e+07	25308502	1.42859e+07
AT1G04630.1	4.72993e+06	3.06362e+06	4.38348e+06	2.09721e+06	8045771	7.5885e+06	3.53582e+06	3.54212e+06	4.68884e+06	4.20107e+06	4.73762e+06	4.56603e+06	7.50423e+06	7765760	3.71235e+06	3089104	4.22157e+06	4058229	5.22425e+06	5.80388e+06	7.66118e+06	8.09112e+06	5.16174e+06	4.76011e+06	4.63814e+06	3.83766e+06	6.45126e+06	4.91798e+06	10278906	5.88817e+06	6.09448e+06	5.12091e+06	1.06178e+07	9667220	6.71261e+06	6.46052e+06	1.10087e+07	8.85768e+06	6400323	5.42932e+06	4.37065e+06	2.73084e+06	10390768	7.10576e+06	7.93311e+06	5.18263e+06	7.18032e+06	4.15024e+06
AT1G04640.2	76617150	2.50301e+07	5.70625e+07	4.46867e+07	3.02962e+06		3.11729e+07	1.38225e+07	4.02667e+07	4.65845e+06	2856914	3.83157e+06	8090057	3247925	6.30817e+06	3.03349e+07	2.64824e+06	932481	1.15614e+07	3.58643e+06	1.88585e+07	3.40581e+06	4.75679e+06	1.94189e+06	6.72556e+07	73983894		4630885	5.9406e+07	5.84169e+07	2819690	2.84881e+06	1.76365e+06	1.34098e+06	770518	631122	2.23754e+06		1.04363e+06	2264458	16071572	1.67121e+07	1.29754e+06	2.99135e+06	2.44772e+06	2.12433e+06	45998910	1.65901e+07
AT1G04690.1	1.22373e+08	8.7057e+07	6.65946e+07	7.79604e+07	1.69676e+08	1.4947e+08	1.25436e+08	1.15876e+08	1.23482e+08	1.07324e+08	1.12767e+08	1.24107e+08	1.73371e+08	1.4297e+08	1.21409e+08	1.07139e+08	1.02751e+08	9.66374e+07	1.53053e+08	1.0626e+08	1.9074e+08	1.88048e+08	1.63736e+08	1.15296e+08	1.37576e+08	1.23261e+08	1.29488e+08	1.34747e+08	155203776	1.48769e+08	1.36255e+08	1.27482e+08	1.70617e+08	1.7661e+08	1.46493e+08	1.39797e+08	1.74139e+08	1.75505e+08	1.19137e+08	1.15201e+08	1.21814e+08	8.31178e+07	1.90354e+08	1.5613e+08	1.60245e+08	1.36004e+08	2.09301e+08	1.41108e+08
AT1G04710.1	7.1123e+06	2.98175e+06		2.34081e+06	1.95714e+06	657685	978488	867875							2.25859e+06						749085		146936	1.292e+06	4.30277e+06	3501600	1.41854e+06		2824839	5.01514e+06	2.49342e+06	3.43944e+06	2.92887e+06	1.98321e+06	982333	2.85566e+06	1457443		2.48569e+06	998267	3.40114e+06	1.16313e+06	2.05626e+06	2772911			2.11271e+06	2.19799e+06
AT1G04750.1	48725550	28652327	13723574	20990971	84827144	8.37747e+07	37254556	40486146	48547730	32981592	30662864	37241082	82391054	64576204	32422233	43956744	32346610	35119328	49091228	46879492	59035183	56070310	43606440	33588168	2.67251e+07	22334229	37095585	31911486	30637246	28966096	3.93346e+07	3.55339e+07	5.95629e+07	5.13671e+07	48879164	47890380	66464380	57341532	40332365	3.26071e+07	3.34876e+07	1.81436e+07	6.78311e+07	4.76125e+07	3.45565e+07	1.25654e+07	48140884	15442477
AT1G04810.1	1.21865e+07	6.70901e+06	5.59898e+06	6.66445e+06	2.27826e+07	2.25019e+07	1.40459e+07	1.48496e+07	1.68194e+07	1.32229e+07	1.57131e+07	1.87048e+07	2.675e+07	2.1764e+07	1.37697e+07	1.39825e+07	1.24226e+07	1.31708e+07	2.02747e+07	1.99756e+07	2.76666e+07	26108708	2.01106e+07	1.68502e+07	1.66202e+07	1.46181e+07	2.02553e+07	1.78685e+07	2.13548e+07	2.16591e+07	23618740	2.18151e+07	3.23193e+07	2.91969e+07	3.06827e+07	2.76469e+07	3.64672e+07	3.2029e+07	2.2188e+07	1.91498e+07	1.59028e+07	8.53806e+06	4.22993e+07	3.02921e+07	2.57473e+07	2.09229e+07	3.38091e+07	1.91163e+07
AT1G04820.1	2.72516e+09	1.45168e+09	1.86245e+09	1.21808e+09	2.53016e+09	2.50842e+09	1.69456e+09	1.81349e+09	1.90146e+09	1.78564e+09	1.73253e+09	2.07396e+09	3.04831e+09	2.82948e+09	1.85362e+09	1.81635e+09	1.66434e+09	1.78131e+09	2.02576e+09	1.95433e+09	2.29122e+09	2.24772e+09	2.18663e+09	1.67161e+09	1.66916e+09	1.54949e+09	2.22511e+09	2.11089e+09	2.8741e+09	2.52245e+09	2.06508e+09	1.80719e+09	2.72676e+09	2.59116e+09	1.97225e+09	1.9249e+09	2.60713e+09	2.67253e+09	1.99932e+09	1.97714e+09	1.72995e+09	1.43391e+09	2.83441e+09	2.14426e+09	2.24404e+09	1.77878e+09	2.76785e+09	1.87554e+09
AT1G04850.1	331896	267534	2.98253e+06	174435	888099	1.09902e+06	267583	261666	264933	274924	385819	434028	1027616	701155	275870	210886	349256	335024	400029	390603	825947	705394	418125	328578	449616	313725	1.04261e+06	594256	561399	472612	643905	566266	1.02644e+06	744388	848488	750184	1.54556e+06	1429410	801469	705527	415665	200365	1.71554e+06	802995	814878	415310	621270	589604
AT1G04870.2	3.79062e+07	1.45344e+07	2.64225e+07	1.44032e+07	3.42406e+07	3.50024e+07	1.7443e+07	16635981	2.19104e+07	1.69137e+07	2.42188e+07	2.83422e+07	2.99006e+07	2.82397e+07	2.55894e+07	1.98648e+07	2.35557e+07	2.23755e+07	2.66167e+07	2.21833e+07	3.77327e+07	3.69206e+07	3.09973e+07	2.16751e+07	1.56083e+07	1.5436e+07	1.96398e+07	17586823	2.31508e+07	1.80437e+07	22469199	2.13423e+07	23147099	2.73325e+07	2.84312e+07	24996283	35081062	2.69179e+07	2.53582e+07	1.91819e+07	2.47629e+07	1.47248e+07	32858256	2.5687e+07	24996911	1.89934e+07	4.28201e+07	2.63825e+07
AT1G04980.1	2.57928e+07	9.0945e+06	1.05319e+07	1.04025e+07	2.31089e+07	2.46026e+07	1.24039e+07	1.17832e+07	1.86988e+07	1.02827e+07	1.69679e+07	1.83779e+07	3.26893e+07	3.50506e+07	6.19268e+06	1.6333e+07	2.19363e+07	2.32212e+07	3.01727e+07	1.60202e+07	3.48994e+07	3.46166e+07	3.22581e+07	6.41718e+06	2.53042e+07	2.17763e+07	2.21385e+07	2.13721e+07	6.4214e+07	56372514	2.01093e+07	1.91055e+07	3.00099e+07	25795460	1.65155e+07	1.36427e+07	3.35561e+07	2.97561e+07	1.02289e+06	1.59484e+07	1.69371e+07	9.23634e+06	3.66004e+07	2.63261e+07	2.19298e+07	1.57874e+07	3.24964e+07	7.91173e+06
AT1G05010.1	2.29934e+07	1.42043e+07	7.13316e+06	1.11479e+07	4.91474e+07	4.83771e+07	2.78289e+07	3.37922e+07	4.0168e+07	2.76606e+07	3.54511e+07	3.87117e+07	5.8488e+07	4.53316e+07	2.60581e+07	3.12346e+07	2.56879e+07	2.69604e+07	4.07396e+07	3.87725e+07	5.89183e+07	5.76242e+07	4.14755e+07	3.4444e+07	1.91576e+07	1.79157e+07	3.34535e+07	3.10972e+07	2.82561e+07	2.95232e+07	4.1929e+07	3.89676e+07	5.86483e+07	5.46298e+07	7.10105e+07	6.33175e+07	6.24487e+07	5.3849e+07	4.08715e+07	3.32281e+07	3.55893e+07	1.92222e+07	8.44016e+07	5.76142e+07	5.60352e+07	4.16362e+07	6.44132e+07	4.14422e+07
AT1G05150.1	4335514	728122	1.0568e+06						641675	1.33026e+06	623975		810368	622999		1.85877e+06	948321			915451										2.85315e+06				614738	368639	1.42896e+06				366070	1.54993e+06	1.18342e+06		583026			2.15952e+06
AT1G05180.1	2.71179e+07	4.40433e+06	1.28124e+07	20959.1	320604	351371	3201262	2.51299e+06	789437	677274	3.28788e+06		8.53014e+06	1.59219e+06	1.22284e+06	675181		318653	4.47149e+06	383001	7.52665e+06	2.76339e+06	658530	6.64851e+06	100001	1.61232e+06		1.33818e+06	18660742	11822913	3.2069e+06	4.16544e+06	528779		5.20431e+06		469059	403123	649096	3.08031e+06	2.57201e+06	2.28113e+06	389550	179221	435922	2.89143e+06		2.12322e+06
AT1G05190.1	3.58433e+08	2.42319e+08	3.70332e+08	3.28142e+08	5.07708e+08	5.0538e+08	2.05816e+08	2.18254e+08	3.64002e+08	2.9619e+08	2.87706e+08	3.71706e+08	5.67765e+08	4.94815e+08	2.93982e+08	2.70029e+08	3.06696e+08	2.94058e+08	3.91175e+08	3.30973e+08	3.84494e+08	3.78306e+08	3.35887e+08	2.45169e+08	3.71465e+08	3.38864e+08	6.3798e+08	5.75566e+08	5.36502e+08	4.85043e+08	5.41433e+08	4.73287e+08	6.01119e+08	5.77029e+08	4.65896e+08	4.43403e+08	8.28643e+08	7.5805e+08	5.44376e+08	5.01014e+08	4.73386e+08	3.43635e+08	7.32732e+08	5.44235e+08	5.47279e+08	4.58946e+08	6.81554e+08	3.90036e+08
AT1G05240.1	1.59096e+07	1.06092e+07	1.13335e+07	7.58921e+06	1.99887e+07	1.86425e+07	1.43253e+07	1.36397e+07	1.57602e+07	1.31095e+07	1.31366e+07	1.51974e+07	2.35927e+07	2.00214e+07	1.27293e+07	1.05926e+07	1.75304e+07	2866247	2.50424e+06	1.59425e+07	5.06889e+06	4.79645e+06	1.95635e+06	1.65775e+06	1.08701e+07	1.1622e+07	1.71377e+07	1.63454e+07	1.67662e+07	1.34209e+07	1.39811e+07	1.11988e+07	1.63238e+07	6.11093e+06	1.56251e+07	1.47735e+07	2.2649e+07	1.75158e+07	1.3087e+07	1.42039e+07	1.25927e+07	9.48953e+06	1.91754e+07	1.41419e+07	1.62064e+07	1.02266e+07	1.88681e+07	1.21161e+07
AT1G05270.1	7.71813e+06	5.261e+06	8152429	3.29559e+06	6.82527e+06	6.7614e+06	5.70317e+06	4539930	4721976	5.15881e+06	7.09077e+06	6.86361e+06	4591219	5402027		2.15187e+06	7.5154e+06	4.58467e+06	8.93754e+06	6.10001e+06	9302237	6.70046e+06	9101829	8.68333e+06	6.43919e+06	4.25067e+06	7.59896e+06	4.95355e+06	6394111		6.63608e+06	1.38865e+07	9970537	1.19221e+07	1.20021e+07	10724222	11632328	8782321	9173449	6583910	5.37715e+06	3.37268e+06	1.62741e+07	1.37137e+07	10440210	8637290	9207732	8.61246e+06
AT1G05320.8			2.21418e+06				647082		2.04506e+06	1.74086e+06	1.75849e+06	1.61467e+06		1.20469e+06				1.03513e+06	1.78531e+06	1.81232e+06	1.4642e+06	1.27711e+06	4326188	4.97113e+06									1.33284e+06	1.2745e+06	1.09015e+06			874603					2242787	1.64876e+06	1.89094e+06	2.69683e+06
AT1G05350.1	9.8073e+07	1.92495e+07	5.37051e+07	1.6363e+07	5.48822e+07	4.65878e+07	3.36895e+07	3.0224e+07	3.38485e+07	2.70135e+07	5.44501e+07	4.60431e+07	35134857	3.07932e+07	3.72746e+07	2.63153e+07	3.84445e+07	3.01081e+07	3.61301e+07	3.05629e+07	5.79316e+07	4.84217e+07	60012552	4.11069e+07	2.36782e+07	15596885	3.65725e+07	2.27609e+07	4.0577e+07	2.14995e+07	3.46215e+07	2.9339e+07	3.48673e+07	4.50925e+07	4.58993e+07	4.2623e+07	56698623	4.43253e+07	3.46853e+07	2.78668e+07	4.98166e+07	3.35646e+07	47461660	4.34262e+07	4.8991e+07	3.32871e+07	6.99533e+07	2.30601e+07
AT1G05500.1	2.0851e+06	7230.98	625611	804492	37577.5	4.15194e+06	12524.5		2.92069e+06	10011.7	1.76284e+06	33283.5	41854.1	35943.3	1.14259e+06	15106.6	2.47508e+06	2.42133e+06	9366.13	1.463e+06	59501.3	59455.4	2.33204e+06	1.62927e+06	60858.7	1.47392e+06	48148.1	40952.6	17396.8	30714.9	2.90145e+06	2.80161e+06	7.49387e+06	5.46765e+06	4.58485e+06	3.0661e+06	3.42416e+06	3.48267e+06	2.75233e+06	71273.8	8250.81		5.30791e+06	3.32188e+06	2.06938e+06	1.63982e+06	3015123	1.95949e+06
AT1G05510.1	1.81428e+08	5.56454e+07	1.20501e+08	5.13907e+07	8.8067e+07	6.37967e+07	1.74993e+08	2.1955e+08	2.49301e+08	2.54639e+08	1.59431e+08	1.71272e+08	1.0237e+08	9.29821e+07	7.59204e+07	8.76279e+07	6.1413e+07	6.71309e+07	2.57316e+08	2.7181e+08	2.51458e+08	2.1459e+08	3.5471e+08	3.14774e+08	7.97296e+07	6.78366e+07	6.43737e+07	8.52297e+07	8.8436e+07	6.04286e+07	3.79583e+08	3.16188e+08	2.53403e+08	1.62933e+08	2.30863e+08	1.55984e+08	9.66255e+07	6.58365e+07	8.40432e+07	8.32422e+07	86948229	8.22431e+07	1.88273e+08	1.50664e+08	3.34092e+08	3.30022e+08	3.33015e+08	2.7234e+08
AT1G05520.1	9.81158e+08	5.80871e+08	7.27348e+08	5.02497e+08	2.46581e+07	2.06517e+07	3.12587e+08	3.26349e+08	4.05114e+08	3.80736e+08	1.93075e+08	1.86848e+08	5.105e+08	3.6523e+08	3.24777e+08	5.1266e+08	1.80952e+08	2.91054e+08	3.14875e+08	3.4243e+08	2.94122e+07	3.13631e+07	3.64473e+08	3.07057e+08	6.84305e+08	6.25469e+08	2.48497e+07	7.92261e+08	8.20898e+08	6.44639e+08	1.47453e+08	3.19584e+07	2.99606e+07	2.57001e+07	3.70849e+07	3.42162e+07	2.05271e+07	27328757	2.89162e+07	2.68109e+07	1.75755e+07	1.50398e+07	3.73829e+07	3.14789e+07	3.7545e+07	2.58652e+07	4.57194e+08	7.64519e+08
AT1G05560.1	2.68584e+07	1.47432e+07	1.11018e+07	8.63317e+06	3.44147e+07	3.51201e+07	2.23607e+07	2.57117e+07	2.86902e+07	1.79105e+07	2.23174e+07	2.2451e+07	36532641	2.86872e+07	1.88916e+07	2.27716e+07	1.47152e+07	1.44163e+07	3.34489e+07	2.88009e+07	3.70286e+07	3.85224e+07	2.74852e+07	2.01879e+07	2.57806e+07	2.62223e+07	3.80208e+07	2.17701e+07	4.11982e+07	3.6504e+07	3.67697e+07	3.28944e+07	5.60261e+07	4.47369e+07	6.00472e+07	5.30158e+07	5.10559e+07	4.33692e+07	4.29362e+07	3.10058e+07	2.1242e+07	1.06237e+07	7.45759e+07	5.2797e+07	4.31194e+07	3.28121e+07	7.55231e+07	3.87416e+07
AT1G05570.3				995686					2246397	1.79788e+06	1.71872e+06			1.75698e+06	1754429	1.57515e+06		2.75785e+06		1.55845e+06			1.67651e+06	1.23727e+06			744863	14888764	3.04393e+06	1.77218e+06		917802		550016		249978							1113027		836594	398782
AT1G05620.1	8.04317e+06	6.56257e+07	31625062	4.22951e+06	1.30079e+07	1.18829e+07	6.17047e+06	5967281	5.89045e+06	2.00004e+07	5.09087e+06	6.43559e+06	5.31192e+06	169606686	5.45666e+07	5.0296e+06	3.23528e+07	2.89402e+06	6.39112e+06	6.81989e+06	1.02498e+07	6258120	7.6148e+06	9.7903e+06	5.87265e+06	3.54861e+06	1.47902e+08	3.24068e+06	6.38782e+06	4.51314e+06	1.72904e+08	9.28615e+06	1.56421e+07	7308226	1.80212e+08	155760426	378467157	3.20908e+08	2615705	8.04421e+06	8.96333e+06	4.97777e+06	2.71283e+08	1.46999e+08	1.10167e+07	4.52156e+06	2.09585e+07	9.23386e+06
AT1G05680.1	493884	2.09256e+06	3.61418e+07	557733	1.18416e+06		6.66971e+06	2.68665e+06	2.811e+06	5014673	6.50303e+06	5.99117e+06				2.30186e+06	955131	1.11697e+06	5174240	4580984	5.73225e+06	5171608	1.77958e+07	1.97994e+07	7.67404e+06	3829580		1.77523e+06	9833210	3.48595e+06	1.23638e+07	1.04659e+07	1.94155e+07	5.4482e+06	16179978	1.00542e+07			3.46446e+06	5.43965e+06	1.82641e+06	3191390	24591830	1.10866e+07	17397514	1.95308e+07	3.4906e+07	1.95962e+07
AT1G05720.1	8.89901e+06	4.04008e+06	8.41254e+06	6.59962e+06	12527181	9615834	8.12445e+06	7.09361e+06	9.26837e+06	8.68919e+06	7227534	9.99301e+06	9.69096e+06	8.44249e+06	7921903	6.03444e+06	4.37855e+06	5.08548e+06	9.9995e+06	9.03427e+06	1.10296e+07	11175769	1.12424e+07	9.23971e+06	7.78471e+06	7.7544e+06	5.94722e+06	5.16799e+06	3.65096e+06	5361277	11087195	1.03141e+07	1.04216e+07	11327595	11867896	11246834	4693260	6.76721e+06	4.33396e+06	8.08181e+06	9.78494e+06	7.45123e+06	1.3429e+07	4750413	9.56098e+06	8.46595e+06	19401629	1.10642e+07
AT1G06000.1	2.94962e+08	1.50737e+08	2.46688e+08	1.54835e+08	3.5006e+08	3.3727e+08	2.22747e+08	2.17038e+08	2.45986e+08	2.24795e+08	2.17929e+08	2.63084e+08	3.41963e+08	3.11893e+08	2.50283e+08	2.26709e+08	2.08347e+08	1.99853e+08	2.87158e+08	2.67335e+08	3.65887e+08	4.07965e+08	3.14555e+08	2.54184e+08	3.18194e+08	2.75486e+08	3.09474e+08	2.6853e+08	3.1333e+08	2.93335e+08	3.86225e+08	3.4006e+08	4.09119e+08	3.82734e+08	3.76371e+08	3.37677e+08	4.75446e+08	4.22615e+08	3.10227e+08	2.91023e+08	3.29206e+08	2.62595e+08	4.69327e+08	3.3704e+08	3.08492e+08	2.6341e+08	4.94463e+08	2.67014e+08
AT1G06190.5	2.43737e+07	1.85329e+07	3.39469e+07	1.53387e+07	1.6835e+07	1.39742e+07	1.8003e+07	1.88928e+07	2.37264e+07	20762507	1.96313e+07	2.46545e+07	2.87148e+07	3.88477e+07	28664021	2.88451e+07	2.26183e+07	2.05779e+07	24954494	2.52017e+07	2.27414e+07	1.49789e+07	28260920	2.92581e+07	2.66639e+07	2.13999e+07	17058800	21520490	9.91624e+07	3.30172e+07	3.43281e+07	2.42055e+07	29496889	2.1973e+07	2.77874e+07	2.24055e+07	3.45961e+07	2.77974e+07	1.67358e+07	3.13742e+07	1.86079e+07	2.43147e+07	3.21522e+07	1.8453e+07	2.66857e+07	2.29535e+07	66251393	3.36486e+07
AT1G06220.3	2.19528e+07	2.62599e+07	3.50979e+07	2.75293e+07	4.95566e+07	4.25391e+07	3.61865e+07	3.71586e+07	3.63711e+07	3.76125e+07	3.20289e+07	3.74577e+07	5.41702e+07	5.03623e+07	3.99176e+07	4.28402e+07	3.50288e+07	4.06991e+07	3.30071e+07	4.19395e+07	4.56897e+07	4.70329e+07	3.81795e+07	3.11125e+07	3.45697e+07	3.24536e+07	4.04119e+07	4.21622e+07	2.70331e+07	2.47971e+07	3.77456e+07	3.34652e+07	4.82243e+07	4.60423e+07	3.97602e+07	3.81383e+07	4.21132e+07	4.82875e+07	43718599	3.91475e+07	4.32417e+07	2.76181e+07	5.87221e+07	3.86545e+07	42534478	1.76437e+07	5.14096e+07	3.66896e+07
AT1G06290.1	1.8028e+08	1.14318e+08	1.32431e+08	7.96845e+07	2.50735e+08	2.19198e+08	2.85282e+08	2.88286e+08	3.31926e+08	2.64556e+08	2.42373e+08	3.26843e+08	3.37949e+08	2.7366e+08	1.6007e+08	1.75618e+08	1.60387e+08	1.65392e+08	3.83239e+08	3.51312e+08	4.18323e+08	4.50107e+08	3.97318e+08	3.23613e+08	1.57797e+08	1.20519e+08	1.9201e+08	1.94831e+08	3.72115e+08	2.85279e+08	2.34884e+08	2.51005e+08	3.28777e+08	3.10042e+08	2.89192e+08	2.66489e+08	2.7055e+08	2.20189e+08	1.66093e+08	1.72294e+08	1.87731e+08	1.13929e+08	3.73922e+08	2.91987e+08	3.34965e+08	3.03405e+08	4.3632e+08	2.93998e+08
AT1G06400.1	53696512	2.91072e+07	43365356	13983492	58812484	54586776		235797	17897768	3.26711e+07		19847260	64168080	2.98383e+07	23012094	20412100	35451524	33824572	16934368	16507819	48948352	30218082	25674826	322284	38510720	2.20862e+07	46715960	3.90785e+07	58362692	43568009	4.29214e+07	2.75609e+07	45461177	45923524	3.81461e+07	3.35682e+07	64215964	5.55598e+07	4.27071e+07	44510216	47323944	33233668	5.53625e+07	44670536	4.84464e+07	2.60246e+07	4.07693e+07	3.82081e+07
AT1G06410.2	7.12719e+07	2.95652e+07	6.44483e+07	4.13188e+07	65569234	6.24615e+07	4.39672e+07	5.20645e+07	7.40506e+07	5.35139e+07	4.69765e+07	7.47731e+07	7.43983e+07	6.5169e+07	5.33326e+07	5.23312e+07	3.90409e+07	3.39968e+07	6.17626e+07	5.25391e+07	5.07865e+07	6.28347e+07	5.75622e+07	4.92607e+07	5.66364e+07	5.30013e+07	5.93804e+07	6.91919e+07	7.00211e+07	6.7922e+07	9.84966e+07	9.15171e+07	1.02194e+08	6.24153e+07	9.24113e+07	6.11055e+07	5.43633e+07	6.01198e+07	7.88579e+07	8.44235e+07	6.47327e+07	5.45186e+07	8.18394e+07	6.49954e+07	9.55523e+07	8.02859e+07	1.23739e+08	7.37372e+07
AT1G06430.2	4110808	8.57436e+06	3.44366e+06	9.97605e+06	20003254	21116918	8541503	9793551	14397993	12948701	1.5867e+07	11709081	18035844	16571671	16044800	1.26759e+07	7.29077e+06	1.05182e+07	16797647	12334227	16250033	14822138	2.354e+07	15989574	17626104	19463724	17106026	14911764	41133326	16963482	18581110	14341050	21743724	20546586	14235875	12788010	23356370	20409410	15235680	16055446	1.89764e+07	14346661	49346792	21326838	14439416	14275392	2.05214e+07	1.06286e+07
AT1G06460.1	12688279	3.94363e+06	4.17364e+06	2.61337e+06	7.72974e+06	7.40849e+06	8.5834e+06	9.66645e+06	9308238	8.74457e+06	9.07898e+06	8.25065e+06	9.37945e+06	7.30568e+06	3069068	3.66255e+06	3.6495e+06	1.41816e+06	9.12487e+06	5.84556e+06	10324884	1.26659e+07	8.70191e+06	7.1953e+06	5.96856e+06	3.20526e+06	4.59588e+06	2.86429e+06	5.03068e+06	6.33226e+06	1.12151e+07	1.09435e+07	1.43599e+07	1.26811e+07	1.17354e+07	1.06579e+07	9.28387e+06	5106320	5447811	2765085	3.04181e+06	1.77532e+06	18491123	1.12892e+07	1.302e+07	7.32633e+06	13699461	9.61617e+06
AT1G06530.1	2.7076e+08	6.56595e+07	6.09916e+07	3.38581e+07	7.22404e+07	7.84542e+07	5.96897e+07	5.55555e+07	6.89885e+07	4.66087e+07	4.28653e+07	41392411	7.67483e+07	4.77683e+07	5.75182e+07	4.03102e+07	4.93196e+07	3.88871e+07	8.16177e+07	5.74683e+07	6.67842e+07	6.05148e+07	7.1951e+07	4.43788e+07	8.23041e+07	5.2809e+07	59104425	54011710	1.45024e+08	9.55682e+07	9.69659e+07	6.63143e+07	6.17116e+07	7.02925e+07	7.36444e+07	7.60441e+07	1.18515e+08	8.12587e+07	6.15544e+07	4.91821e+07	8.66971e+07	6.16644e+07	9.0914e+07	8.03103e+07	6.52948e+07	4.62417e+07	1.20049e+08	6.57657e+07
AT1G06550.1	9.51953e+07	6.3714e+07	5.82412e+07	6.97867e+07	1.17069e+08	1.06248e+08	7.72922e+07	8.80806e+07	9.34832e+07	7.71825e+07	6.91067e+07	8.13924e+07	1.25297e+08	1.14183e+08	5.71567e+07	7.25946e+07	6.10294e+07	7.29677e+07	1.10671e+08	1.15255e+08	1.48558e+08	1.37688e+08	1.05295e+08	8.50044e+07	1.0257e+08	9.41014e+07	1.12029e+08	1.09743e+08	1.85314e+08	1.8363e+08	1.65684e+08	1.42443e+08	1.67486e+08	1.52113e+08	1.43032e+08	1.36419e+08	1.67655e+08	1.52459e+08	1.1428e+08	1.25284e+08	9.07721e+07	7.16156e+07	1.94316e+08	1.45158e+08	1.34351e+08	1.23954e+08	2.10023e+08	1.16515e+08
AT1G06570.1	2.69521e+07	1.62866e+07	3.08122e+07	2.08155e+07	42257997	4.30093e+07	2.82402e+07	3.12954e+07	3.28096e+07	3.7791e+07	2.89617e+07	4.47544e+07	4.72682e+07	3.72516e+07	3.7954e+07	3.29987e+07	3.08344e+07	2.82921e+07	4.19533e+07	3.81557e+07	6.03659e+07	6.50002e+07	4.15697e+07	3.23362e+07	4.70708e+07	3.47227e+07	4.52101e+07	4.7769e+07	5.80594e+07	5.1535e+07	5.55753e+07	4.4439e+07	6.82852e+07	6.92604e+07	5.06291e+07	5.25036e+07	8.00264e+07	6.80807e+07	4.49765e+07	5.13728e+07	4.16572e+07	3.08458e+07	8.16065e+07	6.09274e+07	5.70426e+07	5.13806e+07	7.62993e+07	4.9577e+07
AT1G06650.2	7.14486e+07	2.5293e+07	4.79402e+07	2.28567e+07	4.3216e+07	4.07711e+07	4.07916e+07	33445831	37575089	2.74686e+07	2.82191e+07	2.87662e+07	19622028	38012701	3.26824e+07	2.17904e+07	2.80034e+07	2.25899e+07	3.43102e+07	27553989	3.46927e+07	3.57277e+07	3.50784e+07	2.45525e+07	47439848	4.09753e+07	36190547	3.09252e+07	44932131	4.51281e+07	4.56602e+07	36964715	3.93507e+07	36448169	4.32358e+07	4.19324e+07	5.40857e+07	37037676	3.5344e+07	3.14486e+07	5.2679e+07	3.46103e+07	4.29719e+07	3.43568e+07	3.90436e+07	3.04148e+07	77662918	39693566
AT1G06670.1	3.93346e+06	3.06214e+06	5.67956e+06	4.04864e+06	5.27001e+06	5.04606e+06	5.77164e+06	5.2745e+06	6.61062e+06	6.15487e+06	111837	6.99902e+06	211472	4.66556e+06	5.40076e+06	6.40245e+06	75523.7	248555	5.15152e+06	6.37158e+06	6.50075e+06	5.56269e+06	6.99794e+06	119530	4.90076e+06	463884	252407	5.28435e+06	3.68018e+06	3.13532e+06	5.38032e+06	5.95414e+06	5.86759e+06	5.85084e+06	5.3469e+06	5.0667e+06	6.01355e+06	4.6245e+06	3.86574e+06	5.11174e+06	4.5128e+06	4.22022e+06	6.62909e+06	504527	6.00273e+06	7.09537e+06	7.39671e+06	5.57388e+06
AT1G06680.1	5.92757e+09	1.88535e+09	4.99745e+09	2.32341e+09	3.71251e+09	4.57607e+09	1.75293e+09	2.11123e+09	2.8915e+09	2.48757e+09	1.95665e+09	2.73926e+09	4.79978e+09	4.19037e+09	2.8587e+09	2.59695e+09	2.25336e+09	2.48967e+09	2.49463e+09	2.12618e+09	2.47974e+09	2.72635e+09	2.73337e+09	2.13626e+09	2.56339e+09	2.00841e+09	3.71731e+09	2.99722e+09	5.15895e+09	2.89674e+09	3.7217e+09	3.1588e+09	3.68498e+09	3.21989e+09	3.05377e+09	2.66573e+09	4.09328e+09	5.10285e+09	4.15837e+09	3.154e+09	3.63558e+09	2.61531e+09	2.75533e+09	2.00485e+09	2.55582e+09	1.90377e+09	3.60309e+09	1.71042e+09
AT1G06690.1	122078075	4.7723e+07	7.07834e+07	3.81853e+07	37556424	3.81421e+07	3.72081e+07	3.36382e+07	4.49489e+07	44203765	2.61146e+07	3.08108e+07	6.76322e+07	5.84806e+07	4.5814e+07	5.22112e+07	3.82523e+07	5.58566e+07	4.17121e+07	4.82768e+07	3.57602e+07	3.28381e+07	6.08098e+07	5.26996e+07	7.27877e+07	5.52742e+07	5.13438e+07	6.00236e+07	1.02916e+08	7.22522e+07	4.68574e+07	4.6645e+07	5.6539e+07	5.81336e+07	5.03394e+07	5.40437e+07	3.02781e+07	4.8484e+07	4.52871e+07	43804456	4.67385e+07	4.46769e+07	8.4561e+07	6.50264e+07	5.34894e+07	4.80254e+07	6.85107e+07	4.74035e+07
AT1G06700.1	14153643	4.08594e+06	5.97097e+06	5.28524e+06	8.96248e+06	13388615	7.92645e+06	7.27766e+06	8498040	7655576	7216035	11308569	1.17003e+07	12451402	10430170	7012655	10247782	10966586	9953832	10544894	9.52063e+06	1.46444e+07	1.19315e+07	10158227	4.3192e+06	5.57948e+06	1.27421e+07	7.69826e+06	6.90012e+06	5.83058e+06	9150987	10727432	12977738	14907446	11033583	1.20886e+07		1.4425e+07	10615025	9293517	1.2018e+07	9846901	18306052	14451297	12429738	1.28947e+07	1.55686e+07	6.51132e+06
AT1G06760.1	11954793	7.30204e+06	3.58823e+06	7011587	23928808	26144334	11680102	12812742	15740091	9816651	10567417	13308732	37085156	26587592	9464617	12770499	12015157	12853690	18623112	15596151	21086494	22170648	11559915	8815987	11337511	10322631	23018700	19936972	23895840	29868754	16598380	13816086	28458300	27073058	21593238	18300052	37232952	34312324	19842330	18576736	10579770	5.64407e+06	30176210	21936050	1.56358e+07	12268602	16411908	8744010
AT1G06900.1	2.8736e+07	1.65057e+07	2.89849e+07	1.73967e+07	2.89474e+07	2.47368e+07	2.01431e+07	2.07752e+07	2.50251e+07	2.10305e+07	2.08254e+07	1.90347e+07	3.86865e+07	2.55926e+07	2.12551e+07	2.19912e+07	15319696	1.22522e+07	2.64286e+07	1.96735e+07	2.84665e+07	2.34559e+07	2.73435e+07	1.83426e+07	2.72061e+07	2.17846e+07	1.66626e+07	2.08526e+07	46495503	3.24505e+07	1.93171e+07	1.71117e+07	2.66246e+07	2.19244e+07	2.11152e+07	1.80243e+07	3.10478e+07	2.07626e+07	1.96102e+07	1.63438e+07	2.03026e+07	1.09668e+07	2.76336e+07	1.77832e+07	1.99538e+07	1.5419e+07	3.78386e+07	2.5043e+07
AT1G06950.1	1.02457e+09	3.82952e+08	6.25245e+08	3.35628e+08	5.33804e+08	5.31186e+08	3.78761e+08	3.69019e+08	3.97215e+08	3.51832e+08	3.38098e+08	4.40146e+08	6.24311e+08	4.94279e+08	4.71245e+08	3.64866e+08	4.15281e+08	4.0416e+08	4.31237e+08	3.64681e+08	3.88858e+08	3.85814e+08	4.78997e+08	3.56577e+08	5.29241e+08	4.52116e+08	5.10675e+08	4.02122e+08	7.31759e+08	4.87606e+08	4.28035e+08	3.89756e+08	5.73445e+08	5.45173e+08	5.6441e+08	4.97294e+08	5.16146e+08	4.89124e+08	5.29057e+08	5.14058e+08	4.65879e+08	3.66946e+08	7.11678e+08	5.83543e+08	4.65056e+08	3.84792e+08	6.27432e+08	4.01622e+08
AT1G07040.1	7.12503e+06	7.28844e+06	7.98017e+06	7.63537e+06	1.95593e+07	1.70474e+07	9.96825e+06	1.13004e+07	1.23172e+07	1.12753e+07	1.22928e+07	14773632	18076501	1.7069e+07	1.11646e+07	1.04372e+07	9.93555e+06	1.01115e+07	1.43202e+07	1.31092e+07	1.80993e+07	1.94922e+07	1.35445e+07	9.49645e+06	1.1298e+07	1.09819e+07	18900547	1.79561e+07	1.40443e+07	14528819	17220541	1.45223e+07	26529290	24294227	18016708	1.71259e+07	27847598	27427962	15275305	15177956	1.24065e+07	9161865	30910007	2.25192e+07	2.21681e+07	18543864	1.99658e+07	15094410
AT1G07080.1	1.25101e+07	6.35946e+06	4.03617e+06	5.64936e+06	1.8335e+07	1.71632e+07	8.21967e+06	9008735	1.12758e+07	6.94213e+06	8.12897e+06	9.75537e+06	1.88955e+07	1.48868e+07	9.36872e+06	1.08685e+07	7.83193e+06	8.90903e+06	1.1492e+07	1.18559e+07	1.6037e+07	1.62985e+07	1.18379e+07	9.21352e+06	8.37783e+06	6.79933e+06	1.15439e+07	1.10059e+07	1.83237e+07	1.65533e+07	1.27304e+07	1.08261e+07	1.52905e+07	1.48398e+07	1.7755e+07	1.55647e+07	1.84747e+07	1.62655e+07	1.26211e+07	1.11847e+07	1.0422e+07	5.78883e+06	1.63183e+07	1.09747e+07	1.14931e+07	9.20986e+06	1.91994e+07	1.26226e+07
AT1G07110.1	1.39858e+08	4.42538e+07	6.08385e+07	3.16204e+07	4.46385e+07	5.53976e+07	4.91201e+07	5.54918e+07	5.79215e+07	4.2509e+07	4.62376e+07	5.93039e+07	8.2171e+07	59699544	4.77688e+07	3.80991e+07	3.91324e+07	3.78893e+07	7.08592e+07	5.69527e+07	6.95601e+07	4.80065e+07	5.80634e+07	4.76538e+07	8.97294e+07	6.74458e+07	6.22407e+07	6.53348e+07	7.75971e+07	8.25136e+07	7.4013e+07	5.64466e+07	7.41862e+07	5.77034e+07	68722409	5.73304e+07	62002915	5.46894e+07	4.94035e+07	4.36888e+07	43968244	3.09606e+07	6.1956e+07	6.0664e+07	6.01948e+07	5.50871e+07	1.33624e+08	5.27168e+07
AT1G07140.1	5.69687e+06	4.02766e+06	7.03433e+06	1.96998e+06	1.81225e+07	1.71979e+07	2.95571e+06	3.69433e+06	3.87548e+06	6.67641e+06	6.01761e+06	7.93261e+06	1.43177e+07	1.26193e+07	4.97128e+06	3.93331e+06	5.32544e+06	6.07311e+06	8.51038e+06	8.1212e+06	1.60036e+07	1.57453e+07	8.52667e+06	6.60688e+06	4.19495e+06	7.93513e+06	9.12682e+06	8.82436e+06	1.85107e+07	7328387	1.10053e+07	1.16267e+07	17366084	1.69145e+07	1.54686e+07	1.39587e+07	2.45841e+07	1.97292e+07	1.13124e+07	1.15172e+07	7.1611e+06	3.79894e+06	1.98346e+07	1.08688e+07	1.21162e+07	6.49468e+06	13779209	1.24663e+07
AT1G07250.1	4.13136e+07	1.87945e+07	1.64785e+07	1.54107e+07	6.17718e+07	5.85241e+07	3.95764e+07	4.85541e+07	57622615	3.80868e+07	3.49613e+07	4.36181e+07	8.42628e+07	6.35375e+07	3.00917e+07	3.83349e+07	3.90002e+07	3.9274e+07	6.05537e+07	5.70472e+07	7.25146e+07	7.3748e+07	4.67479e+07	3.58043e+07	3.73665e+07	3.61379e+07	5.32084e+07	5.31281e+07	6.14486e+07	6.71103e+07	6.3178e+07	5.77861e+07	8.24863e+07	74475441	8.69053e+07	7.15405e+07	9.28418e+07	8.70864e+07	5.11712e+07	5.25665e+07	43246837	2.60946e+07	1.03336e+08	7.35366e+07	6.65062e+07	5.49869e+07	8.51056e+07	5.5949e+07
AT1G07260.1		44649.1		36854.6			12891.1	12841	13702.4						5856.21	6427.68			5233.48		9301.84					209866		4012.38	721260	257338	5266.38	2532.51					4017.26	53248	2765.9	1902.2			11784.8	3298.14			108179	83346.4
AT1G07320.1	1.37398e+09	5.01195e+08	8.30866e+08	5.3838e+08	1.08777e+09	1.0628e+09	5.22218e+08	5.30894e+08	6.52628e+08	6.2697e+08	6.78237e+08	7.09687e+08	1.03995e+09	9.67777e+08	8.74699e+08	7.43424e+08	6.93523e+08	6.43291e+08	7.40798e+08	6.32049e+08	8.39192e+08	7.96704e+08	6.94489e+08	6.0178e+08	7.5142e+08	6.95076e+08	1.01372e+09	8.3241e+08	9.20176e+08	7.103e+08	9.23711e+08	8.79493e+08	1.00311e+09	9.56874e+08	8.78217e+08	8.15994e+08	1.52679e+09	1.19661e+09	1.08093e+09	9.0954e+08	1.10711e+09	8.00272e+08	1.09596e+09	9.04758e+08	9.10241e+08	7.21281e+08	1.10029e+09	7.48402e+08
AT1G07400.1									570228	616140									339383				646273		5.13572e+07	4.96348e+07	8.81164e+06	7.67383e+06	1.83478e+07	1.57197e+07	2.23263e+07	1.84499e+07	2.99833e+06	4.25664e+06	1.18435e+07	1.18483e+07	5.68929e+07	4.71701e+07	1.9267e+07	1.86644e+07	1.08745e+07	6.49588e+06	3.62671e+07	2.6258e+07	8.37537e+06	4.18605e+06	4.23042e+07	2.2512e+07
AT1G07440.1	4.34755e+06	2.1413e+06	1.5256e+06	857568	6.39038e+06	6.57984e+06	2.51902e+06	2733137	2.85769e+06	2796172	3.32682e+06	4.03626e+06	6.00072e+06	5079514	2.72058e+06	2.18972e+06	3.00913e+06	3.32246e+06	3.72291e+06	4521730	6.54431e+06	6458984	4.53153e+06	4048667	3.67602e+06	3.20486e+06	5.48223e+06	4547497	6500122	4.74241e+06	5.739e+06	5.21107e+06	8.16048e+06	7.29449e+06	6.70624e+06	5.46183e+06	1.07055e+07	9.20734e+06	5.34735e+06	4.37112e+06	4.35074e+06	2.00884e+06	9537384	5.92488e+06	5.36176e+06	3.87106e+06	6.29109e+06	4.04806e+06
AT1G07645.1	3.50546e+07	1.85832e+07	8.92688e+06	1.13159e+07	4.272e+07	3.38934e+07	5.46898e+07	5.40285e+07	5.65185e+07	4.54139e+07	56451124	6.58376e+07	4.67647e+07	3.70329e+07	2.87139e+07	1.70134e+07	8.0208e+06	1.12605e+07	6.90599e+07	6.56387e+07	1.07777e+08	1.06051e+08	7.92628e+07	6.08704e+07	1.91837e+07	1.83294e+07	3.45096e+07	2.91452e+07	3.21397e+07	2.45171e+07	70731934	5.90291e+07	7.76568e+07	7.3141e+07	5.90471e+07	5.22938e+07	3.02974e+07	36828694	2.40916e+07	1.93085e+07	2.56328e+07	1.6204e+07	7.49272e+07	4.66339e+07	7.18825e+07	6.18762e+07	9.18007e+07	45616455
AT1G07670.2	33365848	7275315	12038405	3026466	9998028	12140971	10468888	8921135	11626540	10359883	11102715	11298521	14628046	9127165	10306684	7286515	13473571	11442742	12885987	10050041	11067259	14736832	18253350	13116352	7107606	5.11087e+06	11658219	5.49604e+06	16968240	7.33354e+06	8847093	9459188	15379792	14577003	14747174	14137150	13073036	14580420	12759463	9032389	8558004	6.65787e+06	21175692	16807724	16140911	11135000	16689629	6.86599e+06
AT1G07750.1	4.23342e+07	2.96099e+07	5.23441e+07	3.08943e+07	66755414	5.79492e+07	5.42154e+07	5.84269e+07	6.32285e+07	52187665	6.43312e+07	6.84444e+07	6.69404e+07	6.06522e+07	4.74881e+07	4.03121e+07	4.41924e+07	4.80366e+07	72632442	1.05291e+08	9.1035e+07	8.44788e+07	8.41404e+07	7.09704e+07	4.50117e+07	3.49753e+07	3.96588e+07	4.36275e+07	61291553	4.75123e+07	5.03965e+07	4.44286e+07	6.27263e+07	5.95782e+07	5.24298e+07	5.24008e+07	5.50153e+07	5.17604e+07	3.58688e+07	3.41631e+07	3.00197e+07	2.09171e+07	6.82932e+07	5.03806e+07	5.5975e+07	5.36762e+07	7.78073e+07	4.67803e+07
AT1G07770.3	1.57969e+09	1.19147e+09	1.69673e+09	1.17698e+09	1.83068e+09	1.70094e+09	1.46674e+09	1.5488e+09	1.714e+09	1.60129e+09	1.33794e+09	1.95644e+09	2.4333e+09	2.28881e+09	1.52634e+09	1.56675e+09	1.08574e+09	1.25334e+09	1.65499e+09	1697051412	1.84669e+09	1768721254	1.89799e+09	1.38389e+09	1.88576e+09	1.64978e+09	1.6903e+09	2.37035e+09	2.6539e+09	2.3544e+09	2.12112e+09	1.40352e+09	2.09826e+09	1.86467e+09	1.42093e+09	1.33626e+09	2.00411e+09	2.02962e+09	1.45001e+09	1.88974e+09	1.21204e+09	1.15925e+09	2.40398e+09	1.89692e+09	2149067531	2.19973e+09	2.80325e+09	1.98621e+09
AT1G07780.10	3.06166e+06	1.11347e+06	3.69041e+06	2.33475e+06	2.85108e+06	2.77142e+06	3.28691e+06	1.18272e+06	2.18087e+06	1.48216e+06	2.85884e+06	1.71335e+06	410336	3.61641e+06	2.90781e+06	1.73878e+06	2.82895e+06	2.05423e+06	1.61068e+06	1720306	3.41542e+06	2.44187e+06	2.16404e+06	3.19158e+06	675298	565320	3.69883e+06	5.6367e+06	20382242	20680222	368853	2.26433e+06	4.61131e+06	3.75049e+06	4523214	3.28548e+06	5.67908e+06	2.03138e+06	4.67602e+06	1.62702e+06	2.91572e+06	2.15325e+06	2.50334e+06	2.07869e+06	3.32241e+06	1.86807e+06	5703521	1.70627e+06
AT1G07810.1	4.46445e+07	1.26386e+07	1.93923e+07	9.76693e+06	30623387	2.98876e+07	2.38008e+07	2.7221e+07	3.42622e+07	2.90833e+07	2.9292e+07	3.7414e+07	3.4445e+07	2.81119e+07	1.84085e+07	1.8373e+07	3.26298e+07	2.81985e+07	3.53213e+07	3.59205e+07	3.25664e+07	3.32293e+07	4.74393e+07	3.61363e+07	1.99879e+07	1.35697e+07	1.87909e+07	2.18308e+07	4.71308e+07	2.43759e+07	4.71452e+07	3.15269e+07	5.34174e+07	4.91533e+07	4.40829e+07	3.34918e+07	5.44802e+07	34054085	2.99254e+07	30398505	2.71642e+07	1.99979e+07	5.40115e+07	4.7762e+07	3.60662e+07	4.43114e+07	6.764e+07	2.35426e+07
AT1G07890.1	4.67985e+09	1892003884	3.97726e+09	2.49906e+09	2.17226e+09	1.95682e+09	2.18017e+09	1.57488e+09	1.93536e+09	1.28042e+09	1.39139e+09	1.58908e+09	2.07591e+09	1.70402e+09	1.36111e+09	1.33608e+09	1.07743e+09	1.03565e+09	1.95442e+09	1.57157e+09	2.05824e+09	2.02757e+09	1.54762e+09	1.22574e+09	3.47573e+09	3.31436e+09	1.64582e+09	1.56058e+09	3.71257e+09	3.17759e+09	1.99132e+09	1.70119e+09	2.25087e+09	2.28607e+09	2.55732e+09	2.30919e+09	2.57392e+09	2.17987e+09	1.85568e+09	1.63282e+09	1.50083e+09	9.71969e+08	2.45057e+09	1.79309e+09	1.85181e+09	1.44625e+09	3.92651e+09	2.46442e+09
AT1G07940.4	2.27139e+10	1.13416e+10	1.66408e+10	1.09632e+10	1.22501e+10	1.13615e+10	1.34261e+10	1.30976e+10	1.40787e+10	1.26028e+10	1.2439e+10	1.39243e+10	1.61115e+10	1.3863e+10	1.19746e+10	1.2351e+10	1.07883e+10	1.08235e+10	1.45759e+10	1.35194e+10	1.39687e+10	1.34252e+10	1.56349e+10	1.29627e+10	1.4023e+10	1.26698e+10	1.03797e+10	1.46347e+10	1.83509e+10	1.36735e+10	1.1773e+10	8.98726e+09	1.2749e+10	1.21217e+10	1.17682e+10	1.07841e+10	1.45189e+10	1.14578e+10	1.0165e+10	9.28251e+09	9.1385e+09	6.89847e+09	1.53999e+10	1.23494e+10	1.30972e+10	1.12202e+10	2.06822e+10	1.53062e+10
AT1G07960.4	3.00882e+07	1.60623e+07	9.59858e+06	9.50388e+06	3.18631e+07	2.9134e+07	2.28777e+07	2.40902e+07	3.00893e+07	2.78815e+07	2.61139e+07	3.00393e+07	3.2897e+07	3.06605e+07	2.15327e+07	1.76313e+07	2.54386e+07	3.05579e+07	3.01763e+07	2.77361e+07	3.61717e+07	3.3864e+07	2.88025e+07	2.44445e+07	1.44303e+07	1.20355e+07	2.20729e+07	1.94976e+07	1.78504e+07	1.34771e+07	1.74342e+07	1.51688e+07	1.98964e+07	1.92429e+07	1.87578e+07	1.74068e+07	7.40081e+06	1.97999e+07	1.55193e+07	1.47439e+07	1.92597e+07	1.15727e+07	2.40982e+07	1.77488e+07	1.5927e+07	1.44554e+07	2.32147e+07	1.23809e+07
AT1G07990.1	74732417	20741081	24759292	7.72907e+06	2.961e+07	2.93654e+07	26631442	28678222	39335640	4.12868e+07	3.64793e+07	3.49356e+07	38800428	34440982	2.69436e+07	2.2703e+07	38494487	3.58008e+07	4.12994e+07	35936677	37483375	37500864	46609588	3.84909e+07	1.58502e+07	11090454	27059794	2.00841e+07	44284621	22610122	34542122	32529188	2.72373e+07	20859704	3.4666e+07	27000188	4.22561e+07	35655314	17302676	2.17199e+07	4.65195e+07	3.92462e+07	22248704	17867342	2.92263e+07	24510703	51601815	2.8359e+07
AT1G08110.4	96675892	7.38327e+07	5.27731e+07	5.25962e+07	111040120	110060892	8.44996e+07	7.82974e+07	8.05677e+07	6.37026e+07	64397074	72817794	1.12155e+08	102796512	6.60334e+07	7.15327e+07	66377244	68257421	83739436	7.45696e+07	101518142	99143270	7.82568e+07	59690524	5.60304e+07	3.97193e+07	6.39454e+07	4.90517e+07	89116085	6.15743e+07	6.16404e+07	5.83278e+07	6.69984e+07	4.71913e+07	66713833	61620418	8.65825e+07	7.83233e+07	5.28586e+07	5.23495e+07	58930691	4.06602e+07	7.46699e+07	5.92387e+07	6.60438e+07	5.41085e+07	85618362	4.91262e+07
AT1G08130.1	9.84603e+06	2.42017e+06	6.44335e+06	3.11152e+06		737990	1559446	601452	1.63724e+06						675154				534567		217191				9.60988e+06	6308678	461403	323326	7.06889e+06	9.66075e+06	515352	365206	831861	486199	773342	640652	793836	799033	579834	314688	667750	516073	751848	505733	670978		3.32996e+06	1.44908e+06
AT1G08200.1	4.83395e+08	3.04575e+08	4.54031e+08	3.47088e+08	7.50501e+08	7.46146e+08	5.2072e+08	5.34684e+08	5.93655e+08	5.63524e+08	5.5233e+08	6.74651e+08	7.61696e+08	7.02103e+08	5.56814e+08	4.93844e+08	4.80725e+08	4.66602e+08	7.0429e+08	6.39085e+08	8.81937e+08	8.55743e+08	7.081e+08	5.06578e+08	3.85203e+08	3.71905e+08	5.32582e+08	4.90819e+08	6.39623e+08	5.132e+08	5.65507e+08	4.7703e+08	6.98486e+08	6.78005e+08	4.74509e+08	4.7657e+08	7.9827e+08	7.07677e+08	5.07393e+08	4.92825e+08	4.1529e+08	3.21466e+08	7.47503e+08	6.13634e+08	5.88533e+08	5.51234e+08	7.20711e+08	4.18396e+08
AT1G08360.1	8.5487e+08	3.56337e+08	8.10694e+08	4.52549e+08	5.10038e+08	4.37016e+08	3.97746e+08	4.01591e+08	4.2097e+08	4.14034e+08	3.69376e+08	4.41613e+08	5.34077e+08	5.06152e+08	3.07553e+08	3.93703e+08	2.08793e+08	3.26205e+08	4.34141e+08	4.3193e+08	481791681	4.2869e+08	5.7213e+08	4.28127e+08	4.79273e+08	4.74023e+08	3.29678e+08	4.96304e+08	4.67373e+08	3.92594e+08	6.6573e+08	5.47705e+08	5.32566e+08	3.95133e+08	4.11135e+08	2.7819e+08	4.23623e+08	4.13704e+08	4.34542e+08	4.57517e+08	3.4413e+08	4.84115e+08	3.94773e+08	3.37301e+08	5.61878e+08	5.19958e+08	9.67676e+08	6.43738e+08
AT1G08370.1	1.85948e+07	6.74423e+06	8.52243e+06	7.2552e+06	1.84392e+07	2.01455e+07	1.75075e+07	2.06501e+07	2.45726e+07	1.28264e+07	1.92816e+07	1.99867e+07	3.17875e+07	2.04856e+07	1.07892e+07	1.35236e+07	1.14292e+07	12849408	2.03669e+07	1.69041e+07	2.21919e+07	2.16079e+07	1.93507e+07	1.50429e+07	1.25391e+07	10477476	1.56933e+07	15501726	1.91327e+07	1.93224e+07	2.54967e+07	2.22408e+07	2.91241e+07	2.40041e+07	2.90714e+07	2.80485e+07	3.2761e+07	2.59656e+07	2.12852e+07	21444945	1.4303e+07	9.81429e+06	4.18074e+07	2.74358e+07	23018419	2.20593e+07	3.5661e+07	18397696
AT1G08380.1	999272	1.15799e+06	1.12232e+06	1.28227e+06	2.69016e+06	3.06002e+06	1.23844e+06	1.47793e+06	792943	1.03245e+06	1.18818e+06	1.18593e+06	1.7035e+06	1.8154e+06	1.5311e+06	1.44092e+06	833760	759026	1.32812e+06	1.35919e+06	1.67581e+06	1.68273e+06	1.58527e+06	1.62054e+06	2.20395e+06	2.64179e+06	2.25712e+06	2.10546e+06	1.80185e+06	2.09174e+06	3.48162e+06	3.27936e+06	3.35323e+06	3.29346e+06	1.46808e+06	1.52797e+06	3.58239e+06	3508320	2.94621e+06	2.97913e+06	2.19273e+06	1.85213e+06	3.38987e+06	2.68589e+06	2.30126e+06	2.11335e+06	1.3971e+06	1.40046e+06
AT1G08420.1	6.27261e+07	4.0421e+07	7.7431e+07	4.06477e+07	20387885	2.66333e+07	3.60554e+07	2.43508e+07	3.92089e+07	3.07585e+07	1.20881e+07	16421520	3.63398e+07	2.54778e+07	29220553	2.80503e+07	1.40906e+07	10895459	2.06898e+07	2.20841e+07	2.82368e+07	2.26284e+07	22983552	12404744	8.15205e+07	6.16832e+07	1.28229e+07	2.03277e+07	66826520	5.49384e+07	2.54469e+07	17525922	27488197	2.2579e+07	18514616	27925252	26538558	1.90064e+07	1.58947e+07	1.56976e+07	22927830	14304737	2.16686e+07	2.3159e+07	17338440	2.52577e+07	6.58914e+07	4.24762e+07
AT1G08480.1	29831802	1.76306e+07	6.75607e+06	1.03464e+07	62084998	6.04775e+07	28761137	32547479	33621526	25384414	27166953	32375834	70001640	54217508	22685462	26024034	27583998	2.91129e+07	4.72067e+07	41116328	64018554	61945506	36858987	29815389	29042235	24600165	39109415	32710716	50944058	4.98676e+07	46062678	42752736	70650888	65658486	74623340	64762824	80737832	69425680	42867622	37469750	3.89789e+07	18884984	91799492	59438294	47978478	32024972	65033156	43441684
AT1G08490.1	244946206	1.20566e+08	1.61724e+08	1.11754e+08	142403623	154904811	1.469e+08	1.35433e+08	1.54329e+08	127976116	1.40349e+08	140276035	180420441	168292550	1.27472e+08	117826177	1.55719e+08	148985649	1.52207e+08	1.40171e+08	1.7239e+08	1.73742e+08	1.62971e+08	1.40159e+08	143533257	1.38816e+08	1.3012e+08	1.28083e+08	189455817	1.66964e+08	1.15826e+08	93313066	1.19862e+08	117529391	105509800	101398512	1.44101e+08	1.37722e+08	1.19059e+08	1.00688e+08	116828775	79104018	147081062	129325240	135414904	117248332	1.69336e+08	1.29474e+08
AT1G08520.1	6.76907e+08	2.98602e+08	4.00481e+08	2.47362e+08	6.92965e+08	6.47752e+08	3.44035e+08	3.44914e+08	4.18435e+08	3.54785e+08	4.16983e+08	4.7131e+08	7.09266e+08	6.41063e+08	4.67713e+08	3.58827e+08	4.99256e+08	4.49685e+08	4.40056e+08	3.55421e+08	5.34646e+08	5.49114e+08	4.28075e+08	3.18418e+08	4.07203e+08	3.66944e+08	5.94385e+08	6.46689e+08	5.84263e+08	4.61365e+08	4.40581e+08	3.45828e+08	5.61679e+08	5.51294e+08	4.84973e+08	4.37491e+08	7.47364e+08	6.83492e+08	5.00734e+08	4.73021e+08	4.40188e+08	2.90869e+08	6.59713e+08	4.91261e+08	5.08579e+08	4.60382e+08	5.82151e+08	3.4464e+08
AT1G08550.3	2.98665e+07	1.06848e+07	1.45065e+07	1.08696e+07	3.61638e+07	31044970	1.70753e+07	1.72366e+07	2.10578e+07	1.99853e+07	1.89281e+07	2.12792e+07	3.45601e+07	3.48301e+07	2.38062e+07	1.90289e+07	2.23148e+07	1.74291e+07	1.58219e+07	1.82761e+07	3.08448e+07	2.82333e+07	2.06236e+07	1.20496e+07	1.50697e+07	1.13307e+07	2.47396e+07	2.17608e+07	2.56025e+07	2.35784e+07	2.01345e+07	1.79526e+07	2.03123e+07	2.12158e+07	1.17281e+07	1.74926e+07	3.5408e+07	3.19579e+07	2.09382e+07	1.90512e+07	1.78566e+07	1.137e+07	2.17414e+07	1.62452e+07	1.87474e+07	1.50871e+07	2.32598e+07	1.3636e+07
AT1G08640.1	7.60882e+06	4.8789e+06	6.94352e+06	5.24968e+06	1.72629e+07	1.63883e+07	7.3026e+06	5.78447e+06	8.33962e+06	9.26544e+06	5.65837e+06	9.68871e+06	1.68526e+07	1.66525e+07	1.05664e+07	9.05502e+06	9.51092e+06	8.1225e+06	9.47083e+06	9.00756e+06	1.42999e+07	1.52541e+07	1.31447e+07	8.97774e+06	1.32341e+07	1.36926e+07	16008242	13731544	1.94275e+07	17139538	1.4214e+07	1.26193e+07	1.69927e+07	2.27968e+07	1.20854e+07	1.14251e+07	798830	2.08294e+07	1.49789e+07	1.51687e+07	1.44142e+07	1.04901e+07	27171132	22878362	1.4828e+07	1.41244e+07	1.88727e+07	1.03587e+07
AT1G08830.2	11770066	4.91186e+06	8.32793e+06	6.01168e+06		134278	6.21275e+06			503222	1.47117e+06				3.82929e+06	2351042		1.39185e+06							7.51831e+06	11575107			6.13406e+06									112333						336540	144064	148653
AT1G08880.1	1.40073e+06	1.70616e+06	1.96124e+06	1.6915e+06	2.64565e+06	2.29215e+06	3.27877e+06	3.2552e+06	2.84471e+06	1.83219e+06	1651344	1.46591e+06	3.99918e+06	2.62888e+06	2.27925e+06	1.77059e+06	3.69097e+06	2.30106e+06	2.62043e+06	2.24213e+06	3.54461e+06	2.13176e+06	1.82848e+06	2.50382e+06	1.41172e+06	986152	1.47985e+06	1.02355e+06	633500	532158	1.4028e+06	1.32603e+06	1.36313e+06	1.18921e+06	1.03802e+06		1.50254e+06	1.13129e+06	1502349	1.33947e+06	2.08501e+06	1587679	1.25178e+06	1.38609e+06	1.34019e+06	1.38129e+06	463832	104167
AT1G08970.4	8.19e+06	5.85658e+06	4.06464e+06	3.97571e+06	1.30454e+07	9.71703e+06	6.12804e+06	6.22784e+06	7.29505e+06	6.75903e+06	7.83736e+06	7.01203e+06	1.13473e+07	1.0577e+07	5.494e+06	5.40112e+06	6.28144e+06	6.07155e+06	6.28307e+06	4.49879e+06	9.31063e+06	1.02339e+07	7.49972e+06	5.13011e+06	7.89827e+06	7.42813e+06	1.09816e+07	8.36391e+06	7.51639e+06	6.88302e+06	9.87623e+06	9.58698e+06	1.13002e+07	1.11291e+07	8.48457e+06	6.96666e+06	1.58137e+07	1.43375e+07	1.13936e+07	9.8724e+06	9.27787e+06	5.14223e+06	1.53508e+07	1.14028e+07	1.21754e+07	7.54591e+06	1.14602e+07	8.38821e+06
AT1G08980.1	2.56577e+07	7.27995e+06	1.92472e+07	7.99817e+06	1.05913e+07	8.59998e+06	8.20507e+06	1.03246e+07	1.26254e+07	16844749	9.49825e+06	13179898	2.63813e+07	2.01168e+07	9.14986e+06	1.47128e+07	1.20917e+07	1.69455e+07	1.13336e+07	1.5536e+07	1.17399e+07	9.00459e+06	20005943	1.72627e+07	2.77457e+06	7.36535e+06	1.97147e+07	1.19149e+07	3.61296e+07	1.3061e+07	1.96066e+07	1.46966e+07	2.66234e+07	1.69837e+07	2.09148e+07	1.4247e+07	3.48397e+06	5.20838e+06	1.84817e+07	14872086	7.76556e+06	1.00567e+07	2.09749e+07	11972064	2.20328e+07	1.54612e+07	1.30014e+07	7.91366e+06
AT1G09010.1	1.7645e+07	5.32264e+06	7.62612e+06	3.432e+06	2.11949e+07	2.44967e+07	6.76596e+06	7.93361e+06	1.16118e+07	8.03473e+06	1.14403e+07	1.21843e+07	19540433	1.85985e+07	7446366	1.05206e+07	1.08929e+07	1.31173e+07	8.81701e+06	9.35195e+06	1.52287e+07	1.84245e+07	1.19087e+07	9.11834e+06	9.09191e+06	6.96427e+06	2.18169e+07	1.42928e+07	2.33831e+07	16007085	1.43862e+07	1.36166e+07	2.2345e+07	2.04849e+07	2.67327e+07	1.85334e+07	2.07203e+07	2.86504e+07	2.0207e+07	1.6731e+07	1.80632e+07	8.61577e+06	22259956	2.40068e+07	2.16329e+07	1.44803e+07	2.18222e+07	1.19744e+07
AT1G09020.1	4.09587e+07	1.17202e+07	2.51833e+07	1.98982e+07	2.70076e+07	2.69318e+07	2.50352e+07	2.40962e+07	2.68549e+07	2.17109e+07	1.99017e+07	2.557e+07	31967494	2.67966e+07	2.12851e+07	1.94266e+07	1.74401e+07	1.56971e+07	2.54493e+07	2.36913e+07	29088753	3.21522e+07	2.95183e+07	1.82801e+07	1.82474e+07	2.03778e+07	2.30254e+07	2.0232e+07	2.5071e+07	2.05112e+07	2.54708e+07	1.30417e+07	2.3402e+07	2.84999e+07	2.42355e+07	2.13128e+07	28406455	29835782	1.65441e+07	1.97507e+07	1.46123e+07	9.08995e+06	3.69101e+07	2.67315e+07	2.2499e+07	2.09292e+07	3.652e+07	1.53001e+07
AT1G09040.1	6.94737e+06	5.03758e+06	4.20555e+06	5202444	10605085	10371606	7.12495e+06	7439725	7.95101e+06	4.6628e+06	6.4879e+06	6.78219e+06	12033639	11397826	8805326	10417597		5173456	6705420			7.65457e+06		4168874	4.01014e+06	2.88495e+06		4.96776e+06			5663847	4.83981e+06		4328782	9689551	7.00452e+06	9307465	8892890		5388493	4722483	3.17043e+06			4.39577e+06	3309403	6.93682e+06	4752814
AT1G09130.3	2.54373e+08	7.94663e+07	2.24278e+08	1.10805e+08	1.36548e+08	1.27886e+08	9.29709e+07	8.3249e+07	9.69756e+07	8.52216e+07	9.74399e+07	1.05105e+08	1.18438e+08	1.07973e+08	9.8351e+07	8.21286e+07	1.20286e+08	9.18015e+07	1.09772e+08	9.10619e+07	1.4425e+08	1.3642e+08	1.26872e+08	93064710	8.21763e+07	6.56839e+07	1.02727e+08	6.62592e+07	1.31968e+08	9.09656e+07	7.724e+07	7.22385e+07	9.01024e+07	8.6624e+07	9.0771e+07	7.45763e+07	1.11956e+08	7.72726e+07	8.287e+07	7.35383e+07	8.91021e+07	6.5024e+07	8.85859e+07	8.10285e+07	1.02697e+08	6.40452e+07	1.39361e+08	7.11094e+07
AT1G09150.1	2.18247e+07	1.11194e+07	16957333	1.20922e+07	2.27835e+07	17681833	1.72434e+07	1.61744e+07	14282344	1.44271e+07	1.71779e+07	1.52082e+07	2.28033e+07	1.91473e+07	1.64013e+07	1.45478e+07	1.76638e+07	1.26545e+07	1.92994e+07	1.44112e+07	1.98745e+07	2.01199e+07	1.64649e+07	1.48785e+07	10273147	1.20799e+07	1.36559e+07	1.46645e+07	1.4905e+07	11014410	1.5684e+07	1.36411e+07	1.83658e+07	1.89109e+07	1.56705e+07	1.23617e+07	2.4888e+07	1.64932e+07	15401283	1.36743e+07	1.49808e+07	1.67005e+06	1.93326e+07	17206754	1.74549e+07	1.2275e+07	2.24915e+07	1.59085e+07
AT1G09210.1	3.64778e+08	1.42101e+08	1.8201e+08	1.25817e+08	3.95622e+08	3.80588e+08	2.47153e+08	2.67942e+08	2.49937e+08	2.42502e+08	2.93933e+08	2.91734e+08	3.97409e+08	3.20614e+08	2.1148e+08	2.08722e+08	2.62729e+08	2.43069e+08	3.93418e+08	3.52081e+08	4.74424e+08	4.69444e+08	3.35984e+08	2.95432e+08	1.82261e+08	1.68987e+08	2.94141e+08	2.36936e+08	2.6752e+08	2.38105e+08	3.2374e+08	2.96976e+08	4.73227e+08	4.29265e+08	4.23002e+08	3.743e+08	5.10379e+08	3.66165e+08	2.97627e+08	2.63579e+08	2.43103e+08	1.34544e+08	4.98323e+08	3.63222e+08	3.72105e+08	2.53496e+08	4.16775e+08	2.56486e+08
AT1G09270.2	1.05047e+08	4.16019e+07	7.26194e+07	3.95242e+07	1.40312e+07	5.30765e+06	4.24756e+07	3.35264e+07	4.3589e+07	2.34919e+07	2.0301e+07	2.15098e+07	3.87702e+07	3.72683e+07	1.94659e+07	2.25097e+07	1.88506e+07	2.27954e+07	3.26983e+07	2.38458e+07	1.90301e+07	1.02311e+07	2.96279e+07	2.56836e+07	7.46241e+07	5.2847e+07	3.73675e+06	3.717e+07	7.64827e+07	5.54066e+07	3.94424e+07	2.38411e+07	2.98502e+07	4.39176e+06	1.18382e+07	4.4438e+06	5.31625e+06	4.64631e+06	1.3825e+07	1.82261e+07	1.31656e+07	1.28176e+07	1.65124e+07	4.23495e+06	2.43327e+07	2.37954e+07	5.5011e+07	4.78251e+07
AT1G09290.1	1216064	768279	1.28842e+06	1.21879e+06	392171		1.15276e+06	774463		348942	151277	248058	434431			86217.9		176106	415019	450893	1.27734e+06	679367	200219		2.84157e+06	4.08214e+06		118081			147437	345787	662753	264506									280811	183384		122102
AT1G09310.1	1.596e+09	6.60021e+08	1.34844e+09	8.96111e+08	5.23564e+08	4.96799e+08	7.43143e+08	5.29073e+08	6.46453e+08	5.45076e+08	6.3305e+08	6.90145e+08	5.99766e+08	5.37445e+08	4.87237e+08	4.57595e+08	5.17241e+08	4.55483e+08	5.90762e+08	5.47853e+08	6.19464e+08	5.85087e+08	7.68971e+08	6.25747e+08	8.61384e+08	9.37213e+08	4.58712e+08	4.07393e+08	6.40781e+08	4.53134e+08	6.19123e+08	5.84509e+08	5.49846e+08	5.214e+08	5.635e+08	5.07293e+08	4.87803e+08	4.69757e+08	4.75843e+08	4.38126e+08	4.9693e+08	4.12618e+08	6.44747e+08	5.21741e+08	5.72863e+08	5.29726e+08	8.45665e+08	4.5027e+08
AT1G09330.1			2.68318e+06		4929450		1370652	1.34677e+06	1.19055e+06	397194	2.71966e+06		594407					1.42698e+06	1.93209e+06		2.04833e+06	5.31368e+06		2.55139e+06	697058	1.3182e+06	7.35355e+06	823460	4.11298e+06	4.02776e+06	1.83345e+06	1.14828e+06	3.33283e+06	1.98597e+06	4.16971e+06	3.01785e+06	3355811	7.02888e+06	1.59932e+06		4.24112e+06		3.28293e+06	1.80518e+06	3.93695e+06	1.21471e+06	2.12726e+06	2.15838e+06
AT1G09340.2	5.45568e+09	2.65307e+09	4.05693e+09	2.67963e+09	4.45829e+09	4.0524e+09	2.78495e+09	2.80612e+09	3.23462e+09	3.01226e+09	2.53545e+09	3.05636e+09	5.18439e+09	4.6445e+09	3.72227e+09	3.55037e+09	3.25398e+09	3.11779e+09	3.52657e+09	3.33924e+09	3.57398e+09	3.72888e+09	3.30725e+09	2.66455e+09	3.93929e+09	3.70702e+09	4.49775e+09	4.9355e+09	5.43784e+09	4.24563e+09	4.12754e+09	3.71566e+09	4.26675e+09	3.7437e+09	3.45599e+09	3.17169e+09	4.44639e+09	3.97122e+09	4.07812e+09	3.6537e+09	3.89732e+09	2.94863e+09	4.18153e+09	3.14967e+09	3.71533e+09	2.97701e+09	5.07058e+09	3.64718e+09
AT1G09430.1	9.13e+07	4.55215e+07	5.764e+07	4.93182e+07	9.2314e+07	84153520	8.3655e+07	8.10303e+07	9.06797e+07	6.27371e+07	8.18613e+07	8.66984e+07	8.23972e+07	7.73372e+07	5.79438e+07	5.06027e+07	5.50701e+07	4.37625e+07	8.62012e+07	7.3182e+07	1.11299e+08	1.06604e+08	8.97735e+07	7.62974e+07	6.76158e+07	6.20303e+07	6.48892e+07	56142850	8.40788e+07	7.34019e+07	8.25279e+07	7.06969e+07	1.01083e+08	96752658	8.12835e+07	7.49305e+07	108006667	8.3544e+07	5.98323e+07	5.55369e+07	5.67411e+07	4.27577e+07	1.18745e+08	8.94366e+07	8.9703e+07	78448124	1.3288e+08	66623776
AT1G09490.1	1.15009e+07	4.47993e+06	1.57137e+07	1.65311e+07	7.05714e+06	9.7249e+06	5.45754e+06	4.25985e+06	4.93684e+06	4.28419e+06	6.04896e+06	5676882	7.40403e+06	7.19446e+06	4.14048e+06	4161349	2.66861e+06	4.42012e+06	6234032	4.65358e+06	4.37581e+06	6537907	5.73377e+06	4.58273e+06	8.11534e+06	6.82991e+06	6.95311e+06	6.08369e+06	5.84012e+06	5.97087e+06	5.54532e+06	4.74481e+06	6.97278e+06	6.14677e+06	5.4649e+06	4.85035e+06	1.04825e+07	8.39334e+06	9.73246e+06	3.18422e+06	6231365	4243565	5.09446e+06	3.36422e+06	3.97492e+06	4.63328e+06	7.9982e+06	2453153
AT1G09620.1	2.12215e+08	1.02121e+08	1.48644e+08	1.14026e+08	3.21822e+08	3.12531e+08	1.80715e+08	1.88328e+08	2.15247e+08	1.97443e+08	2.13478e+08	2.6412e+08	2.90135e+08	2.84887e+08	2.20478e+08	1.91031e+08	1.88003e+08	1.81265e+08	2.206e+08	2.12418e+08	3.23761e+08	3.08771e+08	2.47255e+08	1.9528e+08	1.76006e+08	1.5873e+08	2.42117e+08	2.39832e+08	3.02167e+08	2.47915e+08	2.80678e+08	2.38975e+08	3.46528e+08	3.15459e+08	2.95875e+08	2.7392e+08	4.14324e+08	3.50777e+08	2.64927e+08	2.55658e+08	2.38457e+08	1.62534e+08	4.01188e+08	2.97113e+08	3.1405e+08	2.52354e+08	4.20872e+08	2.44541e+08
AT1G09630.1	1.83316e+07	4.49273e+06	5.59091e+06	4994484	2.40623e+06	568895	5.013e+06	1974853	4.97888e+06	2.22777e+06	399696	7.09859e+06	1.40601e+07	945673	3.00027e+06	1.5485e+06	5.42115e+06	1.93341e+06	4.20134e+06	2.72109e+06		667891	1.31301e+06		1.3126e+07	7968202	1.58152e+06	4.39852e+06	3.66706e+07	14430472	3229227	2.7482e+06	1.42792e+06	1.31775e+06	2.98868e+06	1.48825e+06	2.00147e+06	1.06315e+06	1.40337e+06		5663946	3.69363e+06	1.69594e+06	4600546	4.39725e+06	3448909	1.95898e+07	2.95973e+06
AT1G09640.1	1.18107e+09	5.34151e+08	7.47444e+08	4.80228e+08	1.07231e+09	1.05251e+09	7.8676e+08	7.80596e+08	8.73528e+08	8.16299e+08	8.87861e+08	9.73526e+08	1.04965e+09	9.35186e+08	8.12432e+08	6.94116e+08	7.06499e+08	6.93208e+08	9.48383e+08	8.73173e+08	1.18894e+09	1.13117e+09	1.01038e+09	7.36371e+08	7.51169e+08	6.62158e+08	9.10592e+08	8.89075e+08	1.07897e+09	8.24443e+08	9.5507e+08	8.61072e+08	1148572716	1.09853e+09	9.90036e+08	9.63621e+08	9.81707e+08	9.86205e+08	9.32056e+08	7.90906e+08	9.01588e+08	6.28028e+08	1.32505e+09	1.03002e+09	1.04503e+09	8.58306e+08	1.45712e+09	8.93653e+08
AT1G09690.1	1.15997e+09	5.44127e+08	7.62524e+08	5.55467e+08	7.83074e+08	7.77547e+08	6.08699e+08	3.89273e+08	5.12252e+08	3.7351e+08	4.21095e+08	5.36108e+08	7.65268e+08	6.96866e+08	4.91939e+08	4.42558e+08	3.48929e+08	3.44072e+08	5.02619e+08	5.15929e+08	6.78652e+08	6.91758e+08	5.48788e+08	3.71065e+08	7.84756e+08	8.06658e+08	6.06781e+08	5.5473e+08	7.5076e+08	6.21808e+08	5.85394e+08	4.6937e+08	7.90669e+08	7.23482e+08	6.18305e+08	5.89568e+08	8.82742e+08	8.34551e+08	5.68513e+08	5.77353e+08	5.15786e+08	3.27421e+08	9.37114e+08	6.65881e+08	5.47713e+08	4.49234e+08	1.12269e+09	6.53767e+08
AT1G09740.1	2.26425e+06	1.20091e+06	1.87778e+06	1.46685e+06	3.17947e+06	3.4185e+06	2.08883e+06	1.97994e+06	2.63227e+06	1.76839e+06	3.18978e+06	2.41435e+06	3.26413e+06	2.46894e+06	1.46217e+06	973255	1.2139e+06	1.28401e+06	2.27833e+06	1.99289e+06	2.95499e+06	3.17068e+06	2.89525e+06	1.16925e+06	1.35352e+06	1.0028e+06	2.11442e+06	1.63001e+06	3.03058e+06	1.5504e+06	2.47923e+06	1.60358e+06	2710706	2.58621e+06	2.35303e+06	2.72699e+06	1.96451e+06	2.36105e+06	739249	1.85065e+06	1.48078e+06	24205.9	2.86291e+06	1.95348e+06	2.05238e+06	1.72732e+06	3.3014e+06	2.28652e+06
AT1G09750.1	4.45594e+08	2.9618e+08	3.74498e+08	3.01421e+08	7.56566e+08	6.87477e+08	4.50945e+08	4.72264e+08	5.14125e+08	4.68403e+08	4.33426e+08	5.24384e+08	884568031	8.50837e+08	5.71596e+08	5.04539e+08	5.4091e+08	4.60444e+08	5.05502e+08	4.65371e+08	5.76092e+08	5.88992e+08	4.28682e+08	3.40889e+08	4.11427e+08	3.87548e+08	5.8705e+08	6.07853e+08	6.23229e+08	5.76971e+08	4.37216e+08	3.98247e+08	5.43313e+08	5.30578e+08	4.47578e+08	4.34665e+08	4.74976e+08	5.67953e+08	5.46456e+08	536454461	4.45489e+08	3.26269e+08	5.24007e+08	4.18249e+08	4.49761e+08	4.17722e+08	5.10417e+08	3.46649e+08
AT1G09760.1	7.50755e+07	4.15436e+07	9.86333e+07	4.9124e+07	4.09335e+07	4.98762e+07	2.22617e+07	2.73156e+07	3.37482e+07	3.45673e+07	2.76821e+07	3.37998e+07	5.01792e+07	5.06427e+07	3.35342e+07	2.90149e+07	2.93993e+07	2.86402e+07	3.64101e+07	3.79355e+07	4.12509e+07	40663266	3.13736e+07	2.44699e+07	5.85588e+07	5.30561e+07	3.89114e+07	4.16367e+07	5.34543e+07	4.67585e+07	3.49981e+07	2.76351e+07	3.42026e+07	3.11271e+07	3.1617e+07	2.95277e+07	5.18026e+07	5.29733e+07	3.83615e+07	3.30854e+07	3.37495e+07	2.18482e+07	4.09275e+07	3.02215e+07	3.17584e+07	3.46452e+07	4.42571e+07	5.03162e+07
AT1G09770.1	258505711	7.24729e+07	1.50638e+08	6.07562e+07	113662528	9.87464e+07	91269262	7.84437e+07	8.46439e+07	68526680	1.02322e+08	85087208	112028080	9.49581e+07	1.12648e+08	8.35096e+07	1.20439e+08	9.47461e+07	1.01876e+08	80163016	1.12173e+08	1.01232e+08	1.05561e+08	9.52375e+07	1.00925e+08	91210744	109555352	9.83006e+07	1.67509e+08	9.43345e+07	98394256	85549000	9.95535e+07	92691360	1.03357e+08	76910808	160757024	110010448	108975952	104278088	120329960	92092520	122528528	103683792	117760904	112286016	194595362	9.39368e+07
AT1G09780.1	1.31441e+09	7.7902e+08	9.48018e+08	7.09312e+08	1.58899e+09	1.47263e+09	1.23173e+09	1.22208e+09	1.27863e+09	1.1101e+09	1.22785e+09	1.35423e+09	1.70141e+09	1.4809e+09	1.16196e+09	1.09754e+09	1.10423e+09	1.08855e+09	1.59285e+09	1.40671e+09	1.94806e+09	1.88707e+09	1.51481e+09	1.24605e+09	9.77932e+08	8.77763e+08	1.01194e+09	1.04595e+09	1.50198e+09	1.26817e+09	1.25157e+09	1.13742e+09	1.53125e+09	1.47352e+09	1.4597e+09	1.39057e+09	1.47812e+09	1.37958e+09	1.09041e+09	1.06524e+09	1.09831e+09	7.87898e+08	1.8142e+09	1.39508e+09	1.47263e+09	1.20064e+09	2.18874e+09	1.33908e+09
AT1G09795.1	1.40189e+08	5.34879e+07	9.3322e+07	6.06113e+07	1.44931e+08	1.30755e+08	9.24335e+07	9.33917e+07	8.77361e+07	7.10117e+07	7.89428e+07	9.06416e+07	1.48779e+08	1.03382e+08	1.04165e+08	8.64343e+07	8.94439e+07	8.09631e+07	9.11697e+07	8.2832e+07	1.18617e+08	1.27472e+08	1.0468e+08	8.05969e+07	8.9063e+07	7.95067e+07	1.02475e+08	7.47471e+07	1.10171e+08	8.79807e+07	1.01825e+08	7.52441e+07	1.37593e+08	1.10935e+08	9.53937e+07	8.99026e+07	1.51539e+08	1.27768e+08	9.78946e+07	7.63565e+07	1.07588e+08	74549759	1.45086e+08	1.08914e+08	9.83224e+07	8.20702e+07	1.26896e+08	6.82438e+07
AT1G09830.1	3.40041e+07	2.68519e+07	4.13537e+07	3.78999e+07	7.38143e+07	7.06092e+07	4.04892e+07	4.34432e+07	4.88975e+07	4.64746e+07	4.83959e+07	5.51225e+07	7.40665e+07	7.1357e+07	5.30028e+07	4.85588e+07	3.74986e+07	3.85995e+07	5.69907e+07	4.99905e+07	7.46781e+07	7.34655e+07	56893318	3.80353e+07	4.84944e+07	4.51151e+07	6.49207e+07	6.45678e+07	5.71667e+07	5.22694e+07	6.43836e+07	4.73168e+07	75149089	7.23144e+07	4.38278e+07	4.12233e+07	8.02368e+07	8.48995e+07	5.87198e+07	6.19274e+07	4.15546e+07	3.54631e+07	8.52031e+07	7.22057e+07	6.33553e+07	6.18526e+07	65541649	4.6828e+07
AT1G09850.1	3.24732e+06	2.08381e+06	5546181	3.32396e+06	2.1421e+06		1.05622e+06	679290	2.36429e+06	2.54487e+06	855019	1.97834e+06	5992265	6379327	2.23338e+06	3.18108e+06	1.96056e+06	1.32608e+06	1.26092e+06	1.63746e+06	1.28569e+06	104412	2.45435e+06	3257795	5616465	6613758		5.93843e+06	1.50225e+07	6.91896e+06	10321916	5.75863e+06	2.46343e+06		477714				300895	2.80145e+06	2.64156e+06	4.09728e+06	149891	182596	928958	3.25373e+06	3.75256e+06	3485348
AT1G09870.1	2.42309e+06	3.19659e+06	688810	2.57461e+06	6.76338e+06	7616724	6.36422e+06	4.92019e+06	4.94926e+06	4.61388e+06	6.08149e+06	6.03119e+06	1.62169e+06	6.34035e+06	7.52377e+06	4.92501e+06	6.71819e+06	1.21867e+06	7.43304e+06	6.45221e+06	7.27882e+06	8.20731e+06	7.54753e+06	5.41517e+06	1.54267e+06	3.22844e+06	3.96035e+06	3.9704e+06	5.42069e+06	1.31383e+06	4.02247e+06	7.89155e+06	7.18008e+06	7.71579e+06	1.21735e+07	10184928	3.71758e+06	7.06219e+06	5.20958e+06	5.2578e+06	5.43206e+06	4.23798e+06	1.01119e+07	8.78317e+06	7.14898e+06	6.58785e+06	7.34202e+06	7.54498e+06
AT1G10200.1	1.86105e+07	2.15578e+06	1.75297e+07	858562	1.272e+07	1.27287e+07	2.98548e+06	5.63414e+06	8101524	8.11642e+06	7.81595e+06	9.84586e+06	1.68769e+07	1.11393e+07	5.86767e+06	6618496	7.68846e+06	7.9201e+06	1.06768e+07	8.02808e+06	8.16005e+06	7.66704e+06	3.9434e+06	6.50119e+06	5.22045e+06	4.85756e+06	1.40535e+07	1.39638e+07	7.87444e+06	1.95849e+06	10604017	6.93583e+06	9.56055e+06	1.08837e+07	5.14377e+06	1.0411e+07	1.67481e+07	1.37121e+07	6728126	1.05952e+07	21725965	7892604	6820080	8.49383e+06	9.16229e+06	1.33881e+07	6343352	1.38748e+07
AT1G10290.1	2.65346e+08	9.86249e+07	1.22621e+08	6.87872e+07	1.88535e+08	1.88017e+08	1.43227e+08	1.69706e+08	1.5922e+08	1.36786e+08	1.91978e+08	1.42209e+08	2.56108e+08	2.21666e+08	1.41805e+08	1.19362e+08	1.63485e+08	1.45456e+08	1.49108e+08	1.85482e+08	2.1251e+08	1.91422e+08	1.97923e+08	1.3039e+08	1.16564e+08	1.01432e+08	1.74691e+08	1.30587e+08	2.19246e+08	1.48048e+08	1.66319e+08	1.50446e+08	2.6013e+08	1.98658e+08	2.06267e+08	2.0257e+08	2.52109e+08	2.17339e+08	1.64814e+08	1.27615e+08	1.48081e+08	9.40925e+07	2.60871e+08	1.82118e+08	1.82761e+08	1.24019e+08	2.34987e+08	1.13061e+08
AT1G10370.1	2.2995e+08	1.27367e+08	1.39929e+08	1.16161e+08	2.62268e+08	262517644	1.88407e+08	1.9748e+08	2.30114e+08	1.71514e+08	1.76163e+08	2.02349e+08	2.84105e+08	2.30773e+08	157367490	1.79836e+08	1.81505e+08	1.83393e+08	2.68713e+08	2.06699e+08	3.32834e+08	3.24586e+08	2.59523e+08	1.99806e+08	2.27392e+08	2.07516e+08	2.60903e+08	2.3667e+08	2.76707e+08	2.64636e+08	3.57479e+08	3.23718e+08	4.25353e+08	3.95395e+08	4.42076e+08	3.91752e+08	5.17335e+08	4.4243e+08	2.82559e+08	2.59575e+08	2.51899e+08	1.61447e+08	5.09464e+08	3.7553e+08	3.51426e+08	2.94374e+08	4.26337e+08	3.13626e+08
AT1G10490.1		2.24043e+06			2.5513e+06	5.9848e+06	1.10906e+06	2.92987e+06		629264	2.19109e+06		5.01245e+06	3055963	4.58736e+06		4.6712e+06	2.46568e+06	3098456	4.19551e+06	3915051	4.98171e+06	1.2461e+06	2.18645e+06	2.61354e+06		627814	4353763	2.65335e+06	3.27414e+06	2.00058e+06	1.58564e+06		6.26043e+06		3.41618e+06	5.34736e+06	2.88246e+06			877796	983254	1.23529e+06	2.54282e+06	1825698	1.05901e+06		728608
AT1G10510.1	1.18524e+07	5.79468e+06	2.04047e+07	7.22177e+06	9.06852e+06	8.17568e+06	6.73023e+06	3.01033e+06	1.04601e+07	6.91623e+06	3.68588e+06	5.22622e+06	1.31281e+07	9.34448e+06	8.08203e+06	1.44377e+07	3.37981e+06	6.56695e+06	4.57523e+06	1.36051e+07	7.75473e+06	4.94426e+06	1.03864e+07	3.61138e+06	1.45645e+07	9.9794e+06	6.67745e+06	1.039e+07	1.81725e+07	1.58736e+07	7142072	7.07081e+06	1.43505e+07	6.69052e+06	5.48385e+06	4.39549e+06	1.10297e+07	8.46856e+06	3.80682e+06	8.81063e+06	3.23764e+06	4.17366e+06	6.49914e+06	6.50406e+06	3.99003e+06	7.06967e+06	9.76671e+06	7.33919e+06
AT1G10590.2	137364475	2.4537e+07	116010864	3.59434e+07	6.20757e+06	4.3783e+06	2.10323e+07	1.99234e+07	4.63675e+07	1.00377e+08	22396524	2.83331e+07	97487798	96919314	7.08704e+07	84448421	3.15644e+07	6.24509e+07	8.47064e+07	1.03233e+08	1.82293e+07	5.62005e+07	1.28443e+08	6.31936e+07	1.19162e+08	6.02149e+07	5128753	6.82674e+07	2.68185e+08	1.5504e+08	94714141	4.16482e+07	5.1765e+07	5.57439e+07	3.68849e+07	3.79397e+07	6.40012e+07	62243922	5.96005e+06	5630717	3.25183e+07	38532108	66620112	4.27685e+06	54748704	6.61707e+07	1.24838e+08	4.07321e+07
AT1G10670.3	5.70839e+08	2.98159e+08	3.38989e+08	2.24664e+08	2.41846e+08	2.46494e+08	3.09356e+08	3.03552e+08	3.32457e+08	2.69765e+08	2.61309e+08	2.57052e+08	3.28955e+08	2.35583e+08	2.34756e+08	2.69258e+08	2.10757e+08	2.27928e+08	3.39085e+08	3.03466e+08	2.89593e+08	2.80052e+08	3.86149e+08	279167663	3.32941e+08	3.49526e+08	2.16485e+08	3.30051e+08	4.39442e+08	3.88501e+08	2.02035e+08	2.00139e+08	2.61103e+08	2.76296e+08	2.42479e+08	2.58858e+08	3.63833e+08	2.75364e+08	2.26941e+08	2.02888e+08	2.20484e+08	1.5932e+08	3.23395e+08	2.7505e+08	2.75708e+08	2.45147e+08	4.11978e+08	3.52443e+08
AT1G10760.3	6.43606e+08	2.10338e+08	5.31232e+08	2.93531e+08	2.85067e+08	2.80484e+08	2.64535e+08	2.40406e+08	2.87545e+08	2.08022e+08	2.48816e+08	2.51109e+08	3.08639e+08	2.38016e+08	2.24043e+08	1.96854e+08	2.08213e+08	1.93418e+08	2.93809e+08	2.2121e+08	2.74071e+08	2.60849e+08	2.54715e+08	2.07748e+08	4.06511e+08	3.33396e+08	2.7175e+08	2.53921e+08	4.88913e+08	370963338	2.63515e+08	2.57283e+08	2.92982e+08	2.77999e+08	2.69046e+08	2.52142e+08	3.35178e+08	2.9273e+08	2.40985e+08	2.14719e+08	2.58786e+08	1.86988e+08	3.20984e+08	2.58167e+08	2.594e+08	2.04807e+08	4.14405e+08	2.36303e+08
AT1G10840.1	8.3719e+07	4.56798e+07	4.45411e+07	3.13621e+07	99169311	9.56353e+07	5.43767e+07	6.1438e+07	6.56059e+07	4.42789e+07	5.06535e+07	6.37891e+07	1.24425e+08	1.08753e+08	4.97376e+07	5.75338e+07	5.36437e+07	6.11621e+07	8.03842e+07	6.51618e+07	95909313	9.26811e+07	6.81323e+07	5.19979e+07	5.35336e+07	4.62833e+07	7.5213e+07	6.66153e+07	1.15446e+08	1.04758e+08	6.99678e+07	6.47916e+07	1.05456e+08	9.73666e+07	1.01259e+08	8.50233e+07	1.27219e+08	1.08723e+08	7.45157e+07	6.71911e+07	5.15939e+07	2.7659e+07	1.28023e+08	8.91666e+07	8.36214e+07	6.3643e+07	1.21842e+08	7.29989e+07
AT1G10950.1	24827141	1.23764e+07	9440075	9.21002e+06	13942532	14227991	1.35671e+07	13315586	1.50848e+07	8.33265e+06	8694648	7872610	1.51257e+07	10600622	7.64991e+06	7.78034e+06	7507733	7.62693e+06	1.41004e+07	6.88754e+06	12261778	13270447	1.25942e+07	9915013	1.34097e+07	1.16155e+07	8.87079e+06	7977303	25751674	24910550	9135147	7.97665e+06	13795134	1.20216e+07	10572448	11139357	12252149	10799444	7.95129e+06	6977681	6.22021e+06	4330696	13891400	9.83937e+06	9.3338e+06	7309523	19897388	11823700
AT1G11090.1	6.83732e+06	1.06188e+07	1.76671e+07	1.15045e+07	2.19724e+07	2.2137e+07	8.17399e+06	1.2418e+07	1.41166e+07	1.28338e+07	1.33567e+07	1.95493e+07	8.92038e+06	1.19979e+07	1.5996e+07	1.20903e+07	1.45075e+07	9.48026e+06	2.21974e+07	1.87493e+07	1.3256e+07	1.70701e+07	1.42888e+07	1.70605e+07	3.31319e+07	1.84469e+07	4.22133e+07	2.90842e+07	11764248	5.95713e+06	3.95221e+07	2.97163e+07	2.99929e+07	2.87581e+07	1.94809e+07	1.25227e+07	4.22668e+07	4.81659e+07	3.26425e+07	3.31008e+07	1.93758e+07	8.89341e+06	2.46904e+07	2.13068e+07	2.80987e+07	2.57594e+07	1.44535e+07	9.68334e+06
AT1G11310.1	2.06671e+06	2.00511e+06	3.1301e+06	2.22132e+06	7.31134e+06	8.69335e+06	4280921	4.6803e+06	5.35703e+06	5.65422e+06	4.53107e+06	6.32466e+06	6965428	7.11829e+06	4.75446e+06	4.4037e+06	3.92779e+06	4.03559e+06	5835269	5.67914e+06	6.59323e+06	6.8705e+06	5.19482e+06	3.44837e+06	3.64311e+06	4.06751e+06	3655	5296270	1.03004e+06	52925.1	15184.6	3.67626e+06	5587.85	1830.21	9500.43	5691.18		23072.8	4497.98	3.54126e+06		3.18317e+06	6922.04	5.11143e+06	3.99501e+06	4902814		3.64152e+06
AT1G11360.3	6.50622e+07	2.77627e+07	4.57005e+07	2.83592e+07	3.85538e+07	3.31941e+07	4.0636e+07	3.57249e+07	58452547	4.08308e+07	24524267	3.74018e+07	25093292	2.30765e+07	3.31965e+07	46293689	3.06144e+07	11604810	4.194e+07	36176656	4.23458e+07	4.23281e+07	6.46109e+07	4.55859e+07	3.43012e+07	3.09497e+07	32169359	4.00446e+07	6.22349e+07	4.3771e+07	5.74644e+07	34286387	1.68052e+07	4.35686e+07	4.15539e+07	3.6923e+07	3.78401e+07	3.45565e+07	2.56215e+07	3.3548e+07	2.96806e+07	2.75852e+07	4.21036e+07	3.78975e+07	3.51298e+07	4.66722e+07	4.64983e+07	3.87029e+07
AT1G11430.1	2.56693e+06	2.48398e+06	2.05217e+06	2.04224e+06	4.5216e+06	4.7724e+06	2.94369e+06	3.06123e+06	3.06872e+06	3500392	3.32831e+06	3.27327e+06	5.01883e+06	4.5313e+06	3025646	2.94973e+06	3.91651e+06	3.60317e+06	3.86482e+06	3782805	5.22972e+06	5.29941e+06	3.52942e+06	3.29844e+06	2.47497e+06	2.40626e+06	3.27236e+06	3.13036e+06	3.21534e+06	3.03023e+06	3.02066e+06	3.05517e+06	3.82714e+06	3.41327e+06	2.94833e+06	3.10716e+06	5.09091e+06	4.45012e+06	3319566	3072834	3255724	2.64052e+06	4.16261e+06	2.93137e+06	3069390	2.37929e+06	3.27425e+06	3.12107e+06
AT1G11480.1	2.08598e+07	3.39057e+06	1.36087e+07	4.49039e+06	6.59402e+06	5311484	3.35375e+06	2.32137e+06	4.43699e+06	3.33448e+06	4719176	3.41746e+06	4.03141e+06	5.70348e+06	3.32213e+06	2537765	4.52213e+06	3.55168e+06	3.54546e+06	2.91911e+06	4363049	3.30161e+06	4146098	2523357	6221785	4.71202e+06	5397496	4.32066e+06	8.85004e+06	3596595	3.79304e+06	2.97594e+06	5.7163e+06	3.9671e+06	5.67892e+06	5.32494e+06	1.13832e+07	1.04427e+07	6869726	3932604	7168320	4.46871e+06	5.53266e+06	3.47021e+06	4.01618e+06	2.53019e+06	5.53838e+06	2.50738e+06
AT1G11580.2	2.04964e+09	1.36516e+09	7.89434e+08	5.84587e+08	1.63948e+09	1655527357	2.38342e+09	2.51348e+09	3.33065e+09	2.68763e+09	2.06157e+09	2415314914	3.3586e+09	3.17391e+09	1.62427e+09	1485707275	2.89481e+09	3.23295e+09	2.0592e+09	1.83219e+09	2.55685e+09	2.59721e+09	1.67366e+09	1.38424e+09	1.54314e+09	1.37421e+09	2.49771e+09	2.1454e+09	3.24013e+09	2.85646e+09	1.38183e+09	1.22906e+09	2.18201e+09	2.22081e+09	1.66185e+09	1.62848e+09	2.19227e+09	2254371869	1.61045e+09	1.57818e+09	1.61846e+09	1.21693e+09	2.39795e+09	1.98208e+09	2.17631e+09	1.78642e+09	2.08872e+09	1.33659e+09
AT1G11650.2	2.10637e+08	8.23028e+07	1.36392e+08	6.64849e+07	9.05645e+07	1.01368e+08	9.59343e+07	5.99641e+07	9.99561e+07	6.68382e+07	8.29893e+07	8.40044e+07	1.114e+08	9.08904e+07	8.55959e+07	7.26466e+07	6.3956e+07	5.98636e+07	7.76428e+07	7.0867e+07	1.03139e+08	9.88403e+07	8.98698e+07	7.55218e+07	1.1364e+08	1.21576e+08	7.20745e+07	6.13059e+07	1.10524e+08	8.98146e+07	6.94794e+07	6.78555e+07	7.29838e+07	8.57116e+07	7.99309e+07	8.24238e+07	9.87385e+07	9.5625e+07	8.11175e+07	6.7993e+07	8.32353e+07	5.76779e+07	1.06864e+08	7.64744e+07	8.0228e+07	6.66223e+07	1.83406e+08	8.9084e+07
AT1G11660.4	2.22932e+07	1.60814e+07	12030515	1.46475e+07	4.47278e+07	4.97124e+07	2.86179e+07	3.16634e+07	3.95311e+07	3.38111e+07	3.6268e+07	4.33742e+07	5.53327e+07	5.28735e+07	31845557	28417178	2.98905e+07	3.15154e+07	4.43721e+07	4.53681e+07	5.84827e+07	5.85579e+07	4.72635e+07	2.93359e+07	2.50226e+07	2.45514e+07	4.01608e+07	3.41974e+07	3.63553e+07	3.98566e+07	3.59812e+07	3.09885e+07	5.0587e+07	4.79252e+07	3.29288e+07	4.22517e+07	5.66458e+07	56409939	33119562	3.53908e+07	2.31682e+07	1.70255e+07	6.46385e+07	4.92332e+07	3.71868e+07	3.32094e+07	4.78067e+07	27520538
AT1G11680.1	1.09269e+07	4.64238e+06	4.88172e+06	2.66162e+06	24309154	25571079	1.08619e+07	1.01897e+07	1.5097e+07	8.05894e+06	7245359	1.19839e+07	2.68305e+07	2.38692e+07	7.1719e+06	8.97101e+06	8.09252e+06	9.1875e+06	2.13209e+07	1.74943e+07	2.5489e+07	24383197	9161177	9.07486e+06	12917196	1.43605e+07	2.10836e+07	1.9393e+07	2.73963e+07	2.23471e+07	2.79687e+07	2.37607e+07	3.69e+07	35209492	3.3606e+07	29621304	28039699	33955653	23847610	2.29679e+07	19839868	8685469	49046569	36063089	2.79192e+07	1.96488e+07	43005899	19382448
AT1G11720.2	995303	3.45153e+06	7.30617e+06	3.95105e+06	6.57259e+06	6.29486e+06	6.99325e+06	7.36471e+06	9.52949e+06	6.67447e+06	2.71821e+06	8.485e+06	17411036	9.23457e+06	4589365	8.98488e+06	3.60251e+06	7.71856e+06	1.16639e+07	1.10529e+07	6.69715e+06	6.96074e+06	8.05219e+06	4.27448e+06	1.09403e+07	1.04344e+07	4186484	10139671	1.03596e+07	3.06348e+06	9.27664e+06	7.83563e+06	9357137	3937895	5.34197e+06	4.38485e+06	19923987	1.6721e+07	9.75902e+06	8.90028e+06	9495651	3.22542e+06	1.40684e+07	1.0328e+07	6.16766e+06	2.55869e+06	1.11824e+07	2.93387e+06
AT1G11750.2	1.64306e+08	6.93739e+07	1.74824e+08	8.31677e+07	1.02724e+08	9.82438e+07	5.84533e+07	6.33078e+07	9.29e+07	9.26258e+07	7.62975e+07	8.03385e+07	1.47665e+08	1.19816e+08	8.99548e+07	8.16233e+07	8.2259e+07	7.14657e+07	9.20649e+07	7.29495e+07	73753370	6.18083e+07	96367283	7.98152e+07	1.21432e+08	9.97746e+07	9.72714e+07	1.16138e+08	1.94596e+08	1.34573e+08	107036559	9.16734e+07	1.29386e+08	1.0255e+08	8.9472e+07	7.55667e+07	1.4574e+08	1.42183e+08	1.26539e+08	9.91995e+07	8.72101e+07	6.06415e+07	9.24629e+07	6.4505e+07	7.62434e+07	5.53212e+07	1.53727e+08	8.67984e+07
AT1G11840.4	7.28491e+08	3.25844e+08	4.01546e+08	3.16238e+08	5.01886e+08	4.88148e+08	4.14725e+08	4.49221e+08	4.43196e+08	4.18393e+08	3.46246e+08	4.47099e+08	6.70326e+08	5.85505e+08	3.87791e+08	4.14117e+08	3.29615e+08	3.52233e+08	5.0919e+08	5.12874e+08	4.82015e+08	4.73006e+08	5.37004e+08	4.66948e+08	5.14255e+08	4.50611e+08	3.97211e+08	4.57187e+08	6.01566e+08	4.6415e+08	5.37636e+08	3.90108e+08	4.89781e+08	4.75529e+08	3.93591e+08	3.74193e+08	6.24087e+08	5.28546e+08	3.91165e+08	3.76776e+08	2.90771e+08	2.11497e+08	5.44107e+08	4.11045e+08	3.8984e+08	3.59139e+08	5.62947e+08	4.31047e+08
AT1G11860.3	5.74225e+09	2.62919e+09	4.22314e+09	2.61064e+09	2.62476e+09	2.7288e+09	2.59718e+09	2.54673e+09	2.88813e+09	2.52675e+09	2.09551e+09	2.47736e+09	3.62231e+09	3.13019e+09	2.68273e+09	2.67587e+09	2.37142e+09	2.48597e+09	2.79182e+09	2.63016e+09	2.41384e+09	2.35711e+09	3.12029e+09	2.36193e+09	3.73967e+09	3.63796e+09	2.48753e+09	3.27652e+09	4.34678e+09	3.49184e+09	2.8897e+09	2.25495e+09	2.38481e+09	2.27598e+09	2.06411e+09	1.81408e+09	2.82339e+09	2.57859e+09	2.22313e+09	2.09469e+09	2.43223e+09	2.06033e+09	2.34644e+09	2.00515e+09	2.37529e+09	2.13647e+09	3.69302e+09	2.58233e+09
AT1G11870.2	4.44853e+07	2.24738e+07	4.12437e+07	2.2253e+07	4.73777e+07	33765822	2.14767e+07	2.25842e+07	2.77345e+07	2.84566e+07	2.40557e+07	3.24695e+07	43218435	4.18374e+07	3.54807e+07	3.02945e+07	2.48061e+07	2.5596e+07	2.94079e+07	30264170	4.09934e+07	34449012	3.12336e+07	2.35918e+07	2.70264e+07	25701755	3.53699e+07	3.31232e+07	3.40092e+07	2.70689e+07	2.68886e+07	31288800	37032616	3.41e+07	2.75819e+07	26118015	5.3375e+07	4.57312e+07	3.45645e+07	3.30809e+07	35232507	25406657	41964675	3.7341e+07	30996178	26434006	4.51007e+07	2.57097e+07
AT1G11890.1	229878	53877.9	97612.9		698071	869292	80765.2	136244	81997.2		151030	182055		242241	160111	133121				334314	121335	325170			250833	247420	499368	262788			793641	795744	777769	718415	1.27289e+06	903801	720467	673069	660171	489950	577910	254407	801675	520899	416765	263377	733489	616968
AT1G11910.2	6.64429e+07	3.36105e+07	2.15877e+07	2.05176e+07	1.33778e+08	1.36198e+08	2.95255e+07	3.66988e+07	3.55845e+07	3.55922e+07	4.51535e+07	4.80016e+07	1.30325e+08	1.06101e+08	4.58433e+07	5.054e+07	5.4537e+07	5.71985e+07	6.43883e+07	6.24565e+07	9.46417e+07	9.87322e+07	6.07117e+07	5.84896e+07	8.61129e+07	7.32823e+07	1.21621e+08	1.02911e+08	1.2688e+08	1.14434e+08	1.10787e+08	1.03272e+08	1.50608e+08	1.30372e+08	1.4135e+08	1.21324e+08	2.43927e+08	2.02623e+08	1.41269e+08	1.08703e+08	9.17995e+07	4.39401e+07	2.04046e+08	1.23612e+08	1.0602e+08	6.34399e+07	1.14836e+08	9.20454e+07
AT1G11930.1	2.76354e+07	1.71163e+07	1.91662e+07	1.60683e+07	2.7497e+07	2.39311e+07	2.31318e+07	2.30665e+07	2.36651e+07	2.33954e+07	2.06364e+07	2.69026e+07	3.07874e+07	2.92836e+07	2.37765e+07	2.18977e+07	2.22764e+07	2.14718e+07	2.5417e+07	26125862	2.89648e+07	2.77415e+07	2.67941e+07	1.90438e+07	2.29309e+07	2.24136e+07	2.59635e+07	2.64087e+07	23404525	1.81909e+07	2.51229e+07	2.18675e+07	2.43235e+07	2.47981e+07	1.83382e+07	1.73803e+07	29545010	25573743	2.19048e+07	22225086	2.20066e+07	1.67847e+07	2.91227e+07	2.56344e+07	2.72824e+07	2.54116e+07	25008415	17191626
AT1G12000.1	4.9296e+08	2.13738e+08	3.85264e+08	2.04572e+08	2.5935e+08	2.32733e+08	1.75184e+08	2.59925e+08	3.12887e+08	2.43155e+08	2.22008e+08	2.35209e+08	3.82215e+08	3.38354e+08	2.46145e+08	2.61714e+08	1.97913e+08	2.18961e+08	3.02435e+08	2.88872e+08	2.87071e+08	2.74302e+08	3.21534e+08	2.73211e+08	3.44543e+08	2.8178e+08	1.95448e+08	2.71201e+08	577475034	3.60338e+08	2.52973e+08	2.23019e+08	2.99703e+08	2.50268e+08	2.54863e+08	2.26919e+08	2.3302e+08	2.21754e+08	2.03937e+08	2.20491e+08	2.13882e+08	1.76289e+08	3.50712e+08	2.31083e+08	2.62299e+08	2.30675e+08	5.02346e+08	3.38647e+08
AT1G12050.1	7.38983e+07	2.95773e+07	6.53214e+07	3.98367e+07	5.65425e+07	5.19257e+07	4.7882e+07	4.82489e+07	5.77388e+07	5.08409e+07	4.62415e+07	5.34869e+07	7.20699e+07	4.93934e+07	5.97416e+07	5.36527e+07	4.00801e+07	3.90177e+07	6.88799e+07	5.75638e+07	7.58646e+07	6.86782e+07	7.32333e+07	4.66e+07	5.69782e+07	5.14196e+07	3.9432e+07	4.53278e+07	9.54933e+07	5.16736e+07	5.54921e+07	4.92119e+07	4.21509e+07	5.34647e+07	4.84294e+07	4.46756e+07	7.82721e+07	5.23905e+07	4.35982e+07	4.25324e+07	5.30423e+07	3.73797e+07	6.27897e+07	3.87417e+07	5.04296e+07	4.85207e+07	8.90893e+07	5.01148e+07
AT1G12140.3	1.49463e+08	6.06839e+07	1.06509e+08	4.24829e+07	2.89868e+06	1.59894e+06	5.03662e+07	263639	5.69673e+07	4.39664e+07	676269	519265	5.78102e+07	1.41192e+06	356893	45743788		660000	820762	717903	1.542e+06	1.08486e+06	881284	912303	6.13164e+07	3.76072e+07	1.01442e+06	4.21304e+07	1.15404e+08	5.02963e+07	2.68611e+06	1853196	1.81224e+06	2.44221e+06	3.62067e+06	1.00497e+06	2156883	2.013e+06	979724	1.81092e+06	2.36664e+06	410638	3.47457e+06	1349250	1.23875e+06	2.26977e+06	1.37949e+06	4.36528e+07
AT1G12230.2	4.88384e+08	1.86875e+08	3.11649e+08	2.27093e+08	3.16941e+08	3.17028e+08	2.39967e+08	2.34014e+08	3.00337e+08	2.37668e+08	2.41619e+08	2.74337e+08	3.72597e+08	3.37502e+08	3.03228e+08	2.59396e+08	2.36419e+08	2.25805e+08	2.6366e+08	2.32822e+08	2.88144e+08	2.51621e+08	2.59117e+08	2.08092e+08	2.78937e+08	2.40657e+08	2.51871e+08	2.72418e+08	3.93936e+08	2.83711e+08	2.77839e+08	2.08611e+08	2.46583e+08	2.46303e+08	2.15481e+08	2.07623e+08	2.80164e+08	2.64037e+08	2.36461e+08	2.34917e+08	2.7032e+08	2.05438e+08	2.3595e+08	2.20618e+08	2.38953e+08	2.16053e+08	4.01429e+08	2.15865e+08
AT1G12240.1	4.13527e+07	1.96957e+07	1.61114e+07	1.98642e+07	3.28443e+07	3.58257e+07	1.30932e+07	2.45501e+07	1.5195e+07	1.16898e+07	1.48281e+07	1.59834e+07	6.74312e+07	5.53616e+07	1.95268e+07	3.34691e+07	1.79912e+07	1.69813e+07	1.97803e+07	1.5857e+07	2.41962e+07	2.19005e+07	1.72764e+07	1.36483e+07	33985995	1.85969e+07	5.6834e+07	5.05493e+07	5.90338e+07	4.86523e+07	4.25983e+07	3.53626e+07	3.11762e+07	4.5578e+07	3.72195e+07	3.39014e+07	4.97345e+07	4.04244e+07	4.79754e+07	4.34162e+07	4.64728e+07	2.82589e+07	5.04247e+07	1.9285e+07	3.93256e+07	2.94572e+07	5.48848e+07	2.92005e+07
AT1G12250.1	542769	202901	7.29233e+06	2.08212e+06					2.34139e+06		2702739	3.36003e+06	2.85806e+06	2.30134e+06	4.78522e+06		2817505	3.61063e+06	408796	2.05845e+06	2.96989e+06	2401667	3.53326e+06		222876	1.30807e+06	3.73554e+06	3.22355e+06			3.24491e+06	2.76544e+06	1.92786e+06	2.35693e+06	2.91539e+06	1.96482e+06	5.64774e+06	3.92571e+06	3.31501e+06	2.63585e+06	5.31483e+06	4.00603e+06	2282319	1.53568e+06	1.67408e+06	2402529	3.52421e+06	1.93824e+06
AT1G12270.1	6.14413e+07	3.31827e+07	4.29805e+07	2.13682e+07	5.19181e+07	58595129	4.16531e+07	3.88917e+07	4.38199e+07	3.73594e+07	4.3237e+07	4.71226e+07	6.31642e+07	6.00942e+07	3.82856e+07	3.80072e+07	4.083e+07	4.61831e+07	5.54209e+07	5.70546e+07	6.6985e+07	6.76969e+07	6.01532e+07	4.46675e+07	4.04722e+07	3.54684e+07	4.82947e+07	7.5468e+07	1.02261e+08	7.1603e+07	8.48067e+07	7.05393e+07	8.71017e+07	6.18036e+07	5.70641e+07	5.19993e+07	8.39079e+07	6.59848e+07	5.75451e+07	4.6747e+07	4.39255e+07	2.91151e+07	8.98946e+07	5.83674e+07	5.61041e+07	4.28926e+07	6.62717e+07	7.5926e+07
AT1G12310.1	3.25848e+08	2.25364e+08	2.57666e+08	1.61913e+08	3.52796e+08	3.2028e+08	2.49534e+08	2.47281e+08	2.83235e+08	2.57678e+08	2.46195e+08	2.82499e+08	4.07106e+08	3.90032e+08	2.53866e+08	2.38574e+08	2.25027e+08	2.11726e+08	2.95768e+08	2.83543e+08	3.8045e+08	3.70744e+08	3.21777e+08	2.66649e+08	2.64008e+08	2.32835e+08	2.27033e+08	2.5599e+08	4.32382e+08	3.06089e+08	2.90703e+08	2.11942e+08	3.05254e+08	2.9754e+08	2.47026e+08	2.43853e+08	3.38746e+08	3.1521e+08	2.09852e+08	2.16791e+08	2.29478e+08	1.67829e+08	3.34136e+08	2.62887e+08	2.58608e+08	2.39211e+08	4.3527e+08	2.95668e+08
AT1G12360.1	18505280	9588841	2.62358e+06	5.19287e+06	26816252	26477824	1.17679e+07	1.31821e+07	1.21058e+07	6.75166e+06	7407115	8.80522e+06	22118388	18184524	1.59041e+07	17514494	8630382	9800111	11416874	11933528	1.79409e+07	1.88359e+07	7563006	5.77014e+06	7005669	4840723	15199975	1.27999e+07	5372857	4.39175e+06	6.82185e+06	5.72403e+06	10019281	8.95582e+06	7.15855e+06	5.77662e+06	13979999	12069227	6.55417e+06	6.11911e+06	10898241	5.16744e+06	1.00473e+07	7.10891e+06		7326.65	4.64974e+06	1.86021e+06
AT1G12410.1	1.00591e+09	3.68027e+08	5.61997e+08	3.08448e+08	3.86702e+08	3.97579e+08	3.94352e+08	3.97606e+08	4.31337e+08	3.41592e+08	3.07387e+08	3.96213e+08	4.96772e+08	4.88286e+08	3.84156e+08	3.91766e+08	3.69671e+08	3.94576e+08	4.52749e+08	3.6873e+08	3.92653e+08	4.21546e+08	4.07051e+08	3.61763e+08	5.79345e+08	4.79286e+08	5.21159e+08	3.92654e+08	5.59353e+08	4.52305e+08	4.43022e+08	3.79837e+08	4.51431e+08	4.31002e+08	3.85748e+08	3.62572e+08	3.03299e+08	3.54057e+08	4.30084e+08	4.1194e+08	359793945	3.5071e+08	5.57969e+08	4.8893e+08	4.61908e+08	3.92829e+08	5.83606e+08	3.42718e+08
AT1G12520.1		995861	66091	6.35656e+06	1.08172e+06	1.82285e+06	4.76773e+06	5.38939e+06	4761401	4.50303e+06	3.93834e+06	5.83068e+06	1.01691e+07	1.12666e+07	3.61741e+06	3.26736e+06	2.07505e+06	1.95327e+06	1.97289e+06	1.69038e+06	2667035	2.99719e+06	2.95594e+06	1.14396e+06	2.23896e+07	3557837	8.36105e+06	1.69181e+07	3.91374e+07	2.04025e+07	9.23321e+06	4.78917e+06	1.35179e+07	1.19748e+07	9.17517e+06	7.89967e+06	5.41488e+06	4.88417e+06	6.46965e+06	4.57138e+06	8.90253e+06	4.73457e+06	1.14574e+07	9.73161e+06	1.31117e+07	1.00247e+07	4.27947e+07	2.49899e+07
AT1G12770.1	50808264	7.58849e+06	1.85689e+07	9.5211e+06	8.42732e+06	7.24733e+06	6777171	4.9452e+06	4.75467e+06	1.13567e+07	5354599	6353501	1.44506e+07	1.12536e+07	5.39165e+06	6303360	5.53014e+06	4.76045e+06	4868932	4.02451e+06	5.88692e+06	5434269	6057606	4.4824e+06	1.7151e+07	3.15878e+07	14602557	1.05821e+07	1.70619e+07	7.78367e+06	1.48713e+07	1.24693e+07	7.78987e+06	1.30839e+07	1.72451e+07	1.20308e+07	11258320	8536170	14424759	1.35978e+07	1.5886e+07	1.4825e+07	24277458	20258534	21921833	17407931	20032812	1.39963e+07
AT1G12780.1	1.87243e+07	1.17961e+07	1.47522e+07	2.3299e+07	4.96214e+07	75237470	5.44728e+07	6.06281e+07	5.97958e+07	4.60064e+07	5.4932e+07	6.59322e+07	4.8356e+07	5.46017e+07	4.29601e+07	4.97957e+07	1.046e+07	1.74965e+07	8.15487e+07	6.93871e+07	1.00708e+08	1.03358e+08	6.77703e+07	5.31308e+07	3.40767e+07	3.55309e+07	7.06123e+07	6.0413e+07	9.00267e+07	95324060	5.54999e+07	5.18917e+07	109938746	1.05724e+08	1.09604e+08	9.94228e+07	7.3742e+07	8.1171e+07	6.47345e+07	5.7982e+07	5.16879e+07	2.91825e+07	1.13211e+08	9.77861e+07	1.02056e+08	7.57898e+07	1.33417e+08	8.35865e+07
AT1G12800.1	1.66239e+08	6.17895e+07	1.43458e+08	7.83019e+07	9.87467e+07	9.47618e+07	6.78811e+07	7.85825e+07	8.51093e+07	8.56858e+07	7.66801e+07	8.34999e+07	116786233	1.21413e+08	1.02611e+08	8.99549e+07	6.97924e+07	83970447	8.62716e+07	7.9776e+07	8.89487e+07	8.56934e+07	9.43866e+07	79905637	1.33004e+08	1.1961e+08	1.1039e+08	1.19298e+08	1.18747e+08	7.1409e+07	1.49341e+08	1.32225e+08	125650798	1.01548e+08	8.50777e+07	6.95635e+07	1.36431e+08	1.26449e+08	1.10978e+08	1.23457e+08	1.15298e+08	1.04726e+08	1.56819e+08	1.21831e+08	1.30899e+08	121232254	1.51268e+08	9.8894e+07
AT1G12840.1	4.7027e+08	2.62875e+08	4.19806e+08	2.19924e+08	3.83708e+08	3.34577e+08	2.60833e+08	2.2723e+08	2.94936e+08	2.38886e+08	2.23384e+08	2.43217e+08	4.22362e+08	3.52386e+08	2.27611e+08	2.01981e+08	2.49429e+08	2.50986e+08	2.48297e+08	2.44036e+08	3.41027e+08	3.21895e+08	2.84212e+08	2.15617e+08	3.68143e+08	5.3158e+08	2.45638e+08	2.44382e+08	4.43869e+08	5.73828e+08	2.14841e+08	4.23623e+08	2.81167e+08	2.61462e+08	2.31468e+08	2.32865e+08	3.88548e+08	3.48311e+08	2.39208e+08	2.10059e+08	2.00588e+08	3.44892e+08	3.54277e+08	2.60836e+08	2.32572e+08	2.02071e+08	3.8842e+08	2.44342e+08
AT1G12900.5	210709381	1.11256e+08	9.81251e+07	7.64501e+07	1.99219e+08	2.10415e+08	9.31988e+07	9.63165e+07	9.26774e+07	8.47427e+07	7.6626e+07	1.04531e+08	2.26707e+08	2.06346e+08	1.20634e+08	1.15766e+08	1.04999e+08	8.64141e+07	1.23136e+08	1.18668e+08	140246825	1.41911e+08	1.08826e+08	9.01599e+07	1.04468e+08	9.02821e+07	1.57688e+08	1.25141e+08	2.00063e+08	1.6369e+08	142353068	1.31486e+08	1.303e+08	1.11467e+08	1.28461e+08	1.17592e+08	1.81403e+08	1.47186e+08	1.66895e+08	1.35598e+08	1.19402e+08	8.0244e+07	1.15539e+08	8.20689e+07	1.02295e+08	8.38169e+07	1.42698e+08	110571446
AT1G12920.1	2.80845e+08	2.04964e+08	1.52638e+08	1.78452e+08	4.5017e+08	4.44362e+08	2.62952e+08	2.86083e+08	3.26265e+08	2.61696e+08	2.85555e+08	3.28375e+08	4.62894e+08	4.2955e+08	2.94387e+08	2.91147e+08	2.58482e+08	2.66701e+08	3.52991e+08	2.70792e+08	4.56684e+08	4.48356e+08	3.56841e+08	2.88994e+08	2.6851e+08	2.34428e+08	3.64605e+08	3.34405e+08	3.95167e+08	3.70211e+08	3.77109e+08	3.3905e+08	4.85152e+08	4.4637e+08	4.92467e+08	4.45766e+08	5.81266e+08	5.3158e+08	3.83333e+08	3.58612e+08	3.22278e+08	5.65275e+07	6.56783e+08	4.78275e+08	4.27935e+08	3.33879e+08	5.38484e+08	3.75977e+08
AT1G13020.1	7.5926e+07	2.05699e+07	3.66712e+07	2.3181e+07	3.86308e+07	3.84964e+07	3.49331e+07	3.14559e+07	3.23877e+07	3.59031e+07	4.62753e+07	4.37729e+07	4.91177e+07	35826534	3.58574e+07	2.71511e+07	4.34489e+07	3.22814e+07	4.62666e+07	3.33801e+07	3.81211e+07	3.83599e+07	4.44501e+07	2.83187e+07	2.33419e+07	1.84741e+07	3.82234e+07	2.88622e+07	4.40373e+07	1.91804e+07	3.65298e+07	2.6281e+07	3.65698e+07	4.24299e+07	3.65697e+07	2.56101e+07	5.66234e+07	4.24267e+07	3.28857e+07	3.30184e+07	3.69833e+07	2.61036e+07	5.3161e+07	46324382	4.77948e+07	30245836	5.45985e+07	2.95447e+07
AT1G13060.1	1.58965e+08	6.16516e+07	1.10165e+08	5.74389e+07	8.00249e+07	6.71147e+07	6.63863e+07	8.12479e+07	1.00662e+08	8.8862e+07	7.19651e+07	8.08579e+07	1.32425e+08	1.11029e+08	7.21347e+07	9.2804e+07	1.30661e+08	1.71907e+08	9.69877e+07	1.01341e+08	9.99835e+07	7.80371e+07	1.16396e+08	9.82501e+07	9.27829e+07	8.34227e+07	4.68715e+07	8.4657e+07	1.09266e+08	7.191e+07	1.57382e+08	1.00575e+08	7.68417e+07	6.87094e+07	8.67006e+07	6.15788e+07	8.6425e+07	6.20244e+07	5.13705e+07	7.24017e+07	8.24926e+07	9.20283e+07	8.9988e+07	6.10338e+07	8.13147e+07	8.24582e+07	1.34199e+08	1.03316e+08
AT1G13080.1	25722196	11065261	10502220	5.05171e+06	6466431	8634506	15587826	13861856	11924464	12418576	15754202	13850435	13397836	10769681	9570193	8551738	16271819	13558363	16084020	14868750	10683459	12085573	16316050	14304119	9755171	10345795	8377719	7274467	14739420	10229205	11649275	11538449	13653256	13195805	13699566	12997196	7.38673e+06	9107364	11327685	7275278	11880487	9262857	18232398	14922536	14704803	14401496	22236592	11083923
AT1G13090.2	4370102	2.12196e+06	1.20165e+06	984553	7.32991e+06	8.1122e+06	5.65631e+06	6355098	5.26862e+06	4.58196e+06	4.54103e+06	4777121	8898851	7049583	2.49386e+06	3.18555e+06	3280093	3944244	8.55948e+06	7.71327e+06	9145777	1.03787e+07	6.39137e+06	4.97778e+06	5.41323e+06	4.36793e+06	5265368	4.44976e+06	8.59246e+06	6.66694e+06	9632419	8595331	1.22919e+07	12666763	11426569	11551078	11101601	8.35578e+06	5.1893e+06	5.23435e+06	5085222	2.28721e+06	16767968	1.21012e+07	9416705	7.20381e+06	9476008	9285451
AT1G13110.1	17422770	3.33854e+06	2.71019e+06	1.47792e+06	1.19223e+07	1.10917e+07	6.03493e+06	5574777	7.46069e+06	7.12015e+06	7.36122e+06	8194237	10374413	7.48269e+06	6.03325e+06	3.23679e+06	7.41714e+06	6.44351e+06	9.96042e+06	7262891	7.97287e+06	9.8878e+06	9.82314e+06	7.95906e+06	1.9662e+06	1.35347e+06	7.57728e+06	3.6614e+06	1.50623e+07	6.46659e+06	1.01539e+07	7.33755e+06	1.23006e+07	1.11555e+07	1.38371e+07	9.00038e+06	1.23686e+07	9.26266e+06	8191681	7.17382e+06	6.28133e+06	3.09062e+06	13403687	9523544	9.20294e+06	5.96355e+06	1.06197e+07	4.46001e+06
AT1G13270.1	9.64354e+07	4.56015e+07	6.06108e+07	6.91198e+07	9.61273e+07	8.26468e+07	6.28344e+07	6.04669e+07	6.1282e+07	5.72685e+07	1.06588e+08	117963633	167864725	9.44425e+07	7.26637e+07	1.1735e+08	1.26824e+08	6.02752e+07	7.1441e+07	6.35329e+07	75082081	7.5758e+07	1.30641e+08	1.01729e+08	107411871	5.82639e+07	1.63687e+08	81108340	78537357	1.10403e+08	73115911	1.08794e+08	1.30262e+08	8.52258e+07	1.04481e+08	9.72687e+07	1.63284e+08	9.29644e+07	142894889	1.32998e+08	1.41852e+08	1.11577e+08	150909738	1.37005e+08	1.35427e+08	1.39501e+08	1.63317e+08	107582112
AT1G13280.1	6624643	3.63132e+06	1.92128e+06	3.09622e+06	7690657	7577086	4.47866e+06	3.9519e+06	4738547	3.46161e+06	3.72782e+06	4.27782e+06	9.17213e+06	6.88715e+06	4.05704e+06	3.94962e+06	4518493	4.90542e+06	5067742	3.20378e+06	8956565	8105772	5.88657e+06	4544111	4.51348e+06	3328512	6092348	4970269	9.31937e+06	6.95881e+06	5.74498e+06	4.63735e+06	9.39809e+06	6.31925e+06	5.97612e+06	5.40006e+06	1.33986e+07	8636729	6281012	5.10429e+06	5.41348e+06	2.56212e+06	7.79765e+06	5.03345e+06	3.83393e+06	2.5431e+06	6.65249e+06	4.0098e+06
AT1G13320.1	131863379	58089303	7.94465e+07	4.67817e+07	112738368	1.34889e+08	95559646	9.76136e+07	8.85291e+07	9.82858e+07	9.7048e+07	110186360	1.30175e+08	1.16559e+08	8.70752e+07	7.59461e+07	8.27145e+07	90971000	102079136	8.58428e+07	1.3193e+08	1.28047e+08	1.01764e+08	8.93535e+07	9.80223e+07	7.88704e+07	1.36793e+08	1.00818e+08	1.1969e+08	113308542	115438591	1.17497e+08	1.52951e+08	147900346	1.26648e+08	1.44633e+08	1.72426e+08	1.49795e+08	1.12863e+08	1.04494e+08	1.27247e+08	9.47879e+07	1.5817e+08	1.54501e+08	143973395	1.1404e+08	185234005	1.00483e+08
AT1G13420.1			1.30865e+06	1569126	1.49091e+06	680745		645839	879987	1.77739e+06	1.31185e+06	991927	1.29819e+06	1.0154e+06	1.00892e+06	1309010	456397	849667	1.01555e+06	988836	768908	1.26505e+06	5408947	4.39093e+06			470037		2.44331e+06		952334	2.11954e+06	1.7258e+06	2.29402e+06	5.47045e+06	3.69299e+06	1.68281e+06	1.36087e+06	2.80639e+06	1.77611e+06	509476	1.23494e+06	1.26305e+06	532317	718129	574674		1497032
AT1G13440.1	1.76331e+07	9.48395e+06	8.07237e+06	1.58892e+07	6.68605e+07	6.21047e+07	1.76894e+07	1.92182e+07	2.16397e+07	1.38605e+07	1.93472e+07	2.33832e+07	3.31556e+07	2.49178e+07	2.48305e+07	3.18572e+07	9.37407e+06	9.0076e+06	2.51439e+07	2.81683e+07	2.64528e+07	2.29816e+07	1.97854e+07	1.56479e+07	5.90394e+07	4.92226e+07	8.07472e+07	6.73994e+07	1.96205e+07	1.85598e+07	1.10236e+08	9.87655e+07	8.78976e+07	8.28225e+07	1.03018e+08	8.55005e+07	1.20586e+08	1.0064e+08	9.78637e+07	8.35743e+07	6.7888e+07	3.17945e+07	8.36264e+07	5.5142e+07	6.23653e+07	3.99073e+07	1.55043e+08	8.96965e+07
AT1G13560.1	5.44408e+07	2.00386e+07	3.86868e+07	2.73944e+07	9.7267e+06	5.85351e+06	2.14072e+07	1.80975e+07	3.47007e+07	1.91779e+07	1.15693e+07	2.03137e+07	3.31236e+07	2.18339e+07	1.19923e+07	1.60266e+07	9.09992e+06	1.44793e+07	2.30928e+07	2.05196e+07	1.25979e+07	9.74756e+06	2.19548e+07	1.67561e+07	6.03893e+07	4.9483e+07	4.76149e+06	2.02485e+07	3.60706e+07	3.32042e+07	4.63349e+07	3.09938e+07	9.72637e+06	1.13854e+07	1.39166e+07	9.79933e+06	9.3502e+06	7.4093e+06	6.38407e+06	21105525	1.67347e+07	1.92732e+07	1.29635e+07	8124474	3.78016e+07	2.97976e+07	5.44915e+07	2.77061e+07
AT1G13690.1	3.84306e+08	9.48712e+07	2.63722e+08	2.21167e+06	9.03612e+06	9.22165e+06	3.67526e+06	2.07073e+08	3.80114e+06	1.97078e+08	4.27065e+06	5.49193e+06	3.08279e+08	2.54491e+08	4.8531e+06	4.26251e+06	5.05609e+06	4.74066e+06	2.34968e+08	2.33265e+08	7.94936e+06	8.61455e+06	5.32351e+06	2.10354e+08	1.17701e+08	9.22883e+07	1.81629e+08	1.17584e+08	1.95667e+08	8.81849e+07	1.70978e+08	2.16609e+08	2.06351e+08	1.50994e+08	2.01805e+08	1.25713e+08	1.10079e+07	1.03879e+07	1.79282e+08	2.01076e+08	4.88613e+06	1.94157e+08	2.02471e+08	1.63489e+08	2.87668e+08	5.18366e+06	1.33677e+08	4.93054e+06
AT1G13730.2	2015061	518630	1.59829e+06	551041	586496	397160	162003	206298	9786.48	519460	407431	515389	669929	1.34445e+06	731828	1.08837e+06	499464	343768	529639	720878		163279	873348	1.1016e+06	1159639	1.2332e+06	724314	1.62639e+06		1.41275e+06	2.47983e+06	2.02882e+06	1.07016e+06	859598	1521225	924454	224302	2.19819e+06	858228	887780	1.83196e+06	2504610	1288403	661983	625256	431322	1.35716e+06	753079
AT1G13930.1	6.79632e+08	2.65422e+08	9.07025e+08	4.50228e+08	5.69665e+08	5.88428e+08	3.53171e+08	3.50489e+08	3.98226e+08	3.39863e+08	3.63651e+08	4.12324e+08	4.84636e+08	4.56166e+08	2.83335e+08	2.51737e+08	3.03601e+08	2.9999e+08	5.06936e+08	4.82593e+08	5.99598e+08	5.69471e+08	3.89923e+08	3.33587e+08	2.9056e+08	2.44467e+08	4.66868e+08	3.9263e+08	4.98329e+08	3.87761e+08	5.78021e+08	5.24215e+08	6.25247e+08	5.49543e+08	5.24315e+08	4.7848e+08	6.2762e+08	5.33521e+08	3.76638e+08	3.26305e+08	3.5172e+08	2.29808e+08	5.72327e+08	3.94315e+08	4.57495e+08	3.583e+08	6.33774e+08	3.77257e+08
AT1G13950.1		27272.3				2097653				2.04047e+06	1.82224e+06	1.71103e+06		3.37288e+06		2.22272e+06	2.65741e+06	1.93571e+06		1.94336e+06	1.81916e+06	2.02643e+06	4209433	2069868			2.57391e+06	5342873				3.53225e+06	6.80256e+06	3834025	2.24078e+06	928290			3.0487e+06	1.80632e+06		2.61969e+06	3.51654e+06	1872598	2.33651e+06	1277761
AT1G14000.1	1.45868e+08	4.90976e+07	9.8021e+07	4.61669e+07	7.09966e+07	6.02161e+07	4.56732e+07	3.99153e+07	5.36096e+07	3.7386e+07	4.8324e+07	4.3946e+07	5.904e+07	4.62412e+07	5.32406e+07	4.37628e+07	3.73375e+07	3.87037e+07	4.4688e+07	3.69588e+07	4.28248e+07	3.69859e+07	5.31369e+07	3.97095e+07	7.91667e+07	6.19809e+07	5.15347e+07	6.50914e+07	8.48564e+07	6.6237e+07	7.2404e+07	5.31802e+07	5.77563e+07	4.80587e+07	6.35405e+07	6.12786e+07	1.23315e+08	5.87848e+07	6.15316e+07	4.51129e+07	9.24548e+07	5.51086e+07	5.27264e+07	4.07662e+07	4.67165e+07	2.83686e+07	1.06468e+08	7.03929e+07
AT1G14030.1	4.21439e+06	4.31717e+06	6.46579e+06	3.4521e+06	1.1755e+07	6.55929e+06	4.30365e+06	5.78047e+06	4.73958e+06	5.01334e+06	6.96854e+06	1.11992e+07	1.67159e+07	1.30841e+07	5.50668e+06	6.54631e+06	6057256	5.06644e+06	6.29775e+06	5.16363e+06	6.31546e+06	1.06441e+07	4.66409e+06	3.42129e+06	5535438	4.57761e+06	8630369	7.47677e+06	5.79898e+06	9407818	8.48381e+06	8.96468e+06	7.87421e+06	8.08161e+06	6.87213e+06	7.55696e+06	1.5454e+07	1.50858e+07	6.30552e+06	9.26778e+06	4.52693e+06	3.15962e+06	8.15988e+06	9.25638e+06	7.637e+06	7.93433e+06	5.90272e+06	3.01897e+06
AT1G14210.1	3.1254e+06	1.72675e+06	3.49105e+06	2.23264e+06	1.83228e+06	2.67403e+06	2243218	2.18263e+06	2.63256e+06	2.53033e+06	2559610	2.10842e+06	2.65395e+06	1.54331e+06	2653185	3.46903e+06	2.95439e+06	2.48571e+06	3.06581e+06	829068	2787522	2.33302e+06	3.84304e+06	3.38934e+06	2.20064e+06	899829	2.56949e+06	930379	6.77285e+06	3.78886e+06	612344		1.82074e+06	1.38152e+06	1.97919e+06	1.84173e+06	2.22523e+06	2.12525e+06	2.68492e+06	2.67629e+06	2.28279e+06	1.4778e+06	2.40771e+06	610907	3.03424e+06	1.39065e+06	4.01465e+06	1.51329e+06
AT1G14320.1	3.93229e+09	1.24539e+09	1.80614e+09	1.12282e+09	1.22448e+09	7.80699e+08	1.66521e+09	1.66148e+09	1.60646e+09	1.3348e+09	1.21747e+09	1.71308e+09	2.34282e+09	2.00838e+09	1.42935e+09	1.40164e+09	1.38119e+09	1.53501e+09	1.95618e+09	1.75013e+09	1.45721e+09	1.30256e+09	1.79918e+09	1.52523e+09	1.68201e+09	1.64425e+09	7.24644e+08	1.46612e+09	2.12581e+09	1.43074e+09	1.99637e+09	1.70878e+09	1.25782e+09	7.89032e+08	1.32208e+09	6.66179e+08	1.10273e+09	8.69855e+08	9.88596e+08	1.54367e+09	1.18442e+09	1.2099e+09	1.07048e+09	7.72968e+08	2138478029	1.67125e+09	2.31551e+09	1.48308e+09
AT1G14345.1	2.03082e+07	1.07032e+07	1.75022e+07	1.30664e+07	2.496e+07	2.02673e+07	1.08984e+07	1.28682e+07	1.4649e+07	10900992	9.22249e+06	1.09624e+07	2.05541e+07	19953027	1.96357e+07	1.87192e+07	7692116	8.4949e+06	1.29102e+07	1.39798e+07	1.36834e+07	14324493	1.67255e+07	1.33133e+07	2.29467e+07	2.02119e+07	1.59941e+07	1.59679e+07	19802105	1.35629e+07	2.38455e+07	21433610	1.5183e+07	1.52872e+07	1.48144e+07	15640420	2.16077e+07	1.96621e+07	1.61172e+07	1.72014e+07	2.85742e+07	2.59284e+07	1.75765e+07	15965554	1.41775e+07	1.24151e+07	2.39437e+07	1.55362e+07
AT1G14380.4							2.14752e+06	2.33283e+06			3.39497e+06	2.60955e+06	1.1184e+06	3.16318e+06	2.55441e+06	2.82806e+06	3.43465e+06	3.80353e+06	2.53881e+06	2119277			2.58969e+06	3811062			1.10592e+06				932013		2313082	770537	2.1184e+06	1.00511e+06	4.05686e+06		2.20333e+06		3.94613e+06	947081	1.34527e+06	557732	1.68396e+06	2.6859e+06	8.28318e+06	1.71739e+06
AT1G14410.1	619716	435685	358439	245416	635383	819940	267570	9858.19	955664				1.50239e+06	1.02656e+06	369032	529940	1.425e+06	376950	345712	289537	481733		349813	283861	671626	594752	913810	718013	612970	639768	700606	869952	2.4561e+06	734598	682240	485872	1.78813e+06	1.52205e+06	1.25646e+06	908635	656200	473487	1.31731e+06	714649	775722	513206	376603	378166
AT1G14510.1	604876	241297					281891	395745	432578	357926				1.23519e+06		30237.3	519130		587629	694412					367431		750170	648245		1.23312e+06	468845		785910	2.81094e+06	1.01023e+06		1.47079e+06	1.12393e+06				167609	1.31182e+06		515500	284223
AT1G14610.1	4.01686e+08	1.30817e+08	2.33364e+08	1.25517e+08	2.44361e+08	2.46465e+08	1.80386e+08	2.09179e+08	2.11597e+08	1.81923e+08	1.94691e+08	2.4857e+08	2.35956e+08	2.04972e+08	2.28633e+08	1.66714e+08	2.11393e+08	1.9331e+08	2.49778e+08	2.07501e+08	2.74825e+08	2.87486e+08	2.2748e+08	1.87879e+08	1.4123e+08	1.64235e+08	2.02261e+08	1.82229e+08	2.59499e+08	1.92407e+08	2.21041e+08	2.27562e+08	2.84014e+08	2.52858e+08	2.82984e+08	2.65637e+08	2.48412e+08	1.98507e+08	2.32923e+08	2.01904e+08	2.46286e+08	1.87414e+08	3.22943e+08	2.45198e+08	2.76512e+08	1.84537e+08	3.14901e+08	2.03186e+08
AT1G14620.1	1.42057e+07	5.65388e+06	5.75917e+06	325252	1.65766e+06	1.42409e+06	4.68945e+06	725399	286897	392691	532591	819446	1.38684e+06	1.37904e+07	961695	638750	706859	887087	7.55219e+06	1.54977e+07	1.09274e+06	2349372	652335	1.62295e+07	1.18935e+07	9.77141e+06	874839	12784879	1.2585e+07	1.17342e+07	1.75984e+07	11314471	1.51657e+07	1.00862e+06	1585425	956029	2.95953e+06	1.34576e+06	982897	989756	433432	1.63244e+07	1.6365e+07	795511	853310	1.60166e+07	727813	1.65118e+07
AT1G14650.3	31485343	1.11397e+07	2.92679e+07	1.55985e+07	1.89718e+07	1.57496e+07	1.28906e+07	7.15385e+06	9.30857e+06	1.51976e+07	1.96798e+07	1.97487e+07	15658726	8.3924e+06	1.85011e+07	7.1461e+06	2.64339e+07	1.16557e+07	8.25936e+06	6.55755e+06	2.31001e+07	1.79657e+07	2.08265e+07	1.71502e+07	1.00569e+07	9.39453e+06	1.49163e+07	1.08644e+07	3.36735e+07	2.15194e+07	7.43256e+06	7.58449e+06	5.78486e+06	1.25127e+07	9085420	7.95726e+06	3.83334e+07	2.43818e+07	1.8415e+07	8.75414e+06	1.53858e+07	9071424	13195658	1.43525e+07	1.95176e+07	1.57965e+07	2.24859e+07	6.2503e+06
AT1G14670.1	5.08244e+07	6.689e+06	20791516	6.73165e+06	2.17318e+07	23950026	16056485	12298207	14614853	11814638	16698741	16709855	16515119	13242816	18409192	1.226e+07	18782864	15923469	16038170	13966473	22949362	14165192	24198534	20646100	13611906	7201378	14353671	11847266	16747532	8818576	24528050	1.34317e+07	28872882	27449318	22402782	2.11583e+07	46788960	29559304	11369466	12972579	2.62388e+07	25909012	35447604	20781212	1.81627e+07	13405466	36532884	18629608
AT1G14710.2	8.34177e+06	9.30668e+06	2.68736e+06	4.64579e+06	1.76353e+07	1.47955e+07	9.28931e+06	1.32768e+07	11846545	1.13736e+07	8615040	2.37578e+07	27530020	28007981	8.05481e+06	19088574	7.09046e+06	1.32624e+07	12484155	18585923	13615491	14128817	46955130	23234677	17390258	12008424	15487535	20874198	9697569	17283326	19300255	2.03913e+07	37618308	16132487	26434166	14361847	24012778	20967842	1.37791e+07	23790834	1.51477e+07	1.59405e+07	4.41052e+07	19050040	14849580	1.21667e+07	18361680	20378163
AT1G14810.1	3.93832e+08	1.37874e+08	2.35794e+08	1.29566e+08	2.68244e+08	2.18506e+08	1.70381e+08	1.60039e+08	1.67991e+08	1.57943e+08	1.75425e+08	1.7835e+08	2.45985e+08	2.23824e+08	2.19037e+08	1.72311e+08	2.24662e+08	1.92631e+08	1.97508e+08	1.66178e+08	2.45301e+08	2.14372e+08	2.00717e+08	1.81357e+08	1.89251e+08	1.82051e+08	2.38314e+08	1.99562e+08	2.66699e+08	1.51687e+08	2.15796e+08	1.81294e+08	2.19383e+08	2.27734e+08	1.79309e+08	2.0974e+08	3.16374e+08	2.47153e+08	2.07866e+08	1.86576e+08	2.56068e+08	1.97511e+08	2.36102e+08	2.04455e+08	2.16207e+08	1.9046e+08	2.71271e+08	1.94849e+08
AT1G14830.1	1.42525e+08	5.36378e+07	9.6862e+07	5.98045e+07	1.39588e+08	1.31674e+08	8.74597e+07	8.12368e+07	9.26129e+07	9.22521e+07	1.03614e+08	1.30316e+08	1.54055e+08	1.32662e+08	1.1812e+08	9.89254e+07	1.11454e+08	8.44406e+07	1.07343e+08	1.03577e+08	1.44357e+08	1.39683e+08	135448375	9.61996e+07	73805017	7.14701e+07	1.25917e+08	1.07e+08	1.11109e+08	9.63423e+07	125293406	1.03406e+08	1.50202e+08	1.5483e+08	1.41363e+08	1.32833e+08	1.82056e+08	1.61604e+08	1.31369e+08	1.03652e+08	1.0864e+08	7.22756e+07	1.8186e+08	143463914	1.33016e+08	9.91485e+07	1.68641e+08	1.05521e+08
AT1G14850.1	14296714	4.91368e+06	6265409	2.39931e+06	1.06653e+07	9442028	5732130	5.99665e+06	6.79581e+06	5.11423e+06	4.18262e+06	6.22113e+06	1.26191e+07	1.52693e+07	5743871	7.1146e+06	4.52855e+06	4.89533e+06	6.46907e+06	6.23932e+06	7.21216e+06	8.00488e+06	6.82113e+06	5678825	14524054	8209759	3.86207e+06	6.46565e+06	2.53447e+07	1.49007e+07	1.19597e+07	5.12312e+06	1.05026e+07	7599085	8726645	10524124	11075547	1.28313e+07	5878760	4275567	8026012	5.68068e+06	9184338	6.53407e+06	6.39948e+06	1.11574e+07	8.58245e+06	7.49837e+06
AT1G14950.1	2.13349e+06	1.82458e+06	2.54751e+06	1.62303e+06	1.19441e+07	1.18274e+07	1.89364e+07	1.98236e+07	3.06902e+07	2.50373e+07	4.02173e+07	4.85737e+07	3.3648e+06	2.30367e+06	5.36435e+06	4.75375e+06	998511	2.20297e+06	5.93679e+07	5.77422e+07	142809914	138834913	1.49828e+08	1.28523e+08	806051	1.48488e+06	1.12956e+07	1.20453e+07	7644326	2.48207e+06	5.88721e+07	5.8238e+07	6.60164e+07	65305376	3.38854e+07	3.30565e+07	1466203	865001	2.79201e+06	2.60929e+06	1.33582e+06	1439984	5.74385e+07	4.20928e+07	4.98525e+07	35073849	73001631	5.00354e+07
AT1G14980.1	4.25234e+08	2.69429e+08	3.67655e+08	2.70438e+08	5.28836e+08	4.63713e+08	3.64214e+08	3.73994e+08	433061566	423333765	3.96838e+08	4.7092e+08	592005386	5.64201e+08	3.78665e+08	3.35351e+08	3.98483e+08	372676679	5.02598e+08	464843164	6.1465e+08	6.15728e+08	5.1003e+08	3.92737e+08	4.62881e+08	4.5576e+08	5.653e+08	5.0827e+08	7.65351e+08	633590789	4.75916e+08	4.29522e+08	5.91914e+08	623939212	3.74421e+08	3.62506e+08	7.67856e+08	6.33239e+08	5.0582e+08	5.20576e+08	4.26271e+08	3.63684e+08	732125876	6.30807e+08	618636995	5.77517e+08	7.06398e+08	452683265
AT1G15000.1	1.41289e+06	879956	812861	476834	3.38512e+06	4.57136e+06	1.0323e+06	955577	1.2118e+06	1.13843e+06	1.00259e+06	1.19288e+06	1.42006e+06	3.08662e+06	1.25869e+06	1.43613e+06	1.24705e+06	1.54999e+06	1.54384e+06	1.56043e+06	3.97227e+06	2.11481e+06	1.18645e+06	393919	1.541e+06	1.3008e+06	3.46745e+06	2.35737e+06	442045	1.12355e+06	2.58107e+06	2.16714e+06	3.8541e+06	3.45552e+06	891493	2.48146e+06	2.46007e+06	3.63051e+06	2.71223e+06	2.41749e+06	2.01648e+06	931344	1.1004e+06	2.25422e+06	3.05554e+06	1.49029e+06	1.18857e+06	1.36574e+06
AT1G15120.1				2.48348e+06																					5.17294e+06			934897			1.34556e+06	2.4088e+06		2.87236e+06	1.36204e+06		1.40034e+07	8.58914e+06	890132	993132	2.30398e+06	6396271		1541218			2.70505e+06	510081
AT1G15130.1	1.43368e+07	1.54942e+07	1.33988e+07	8.09921e+06	1.58921e+07	1.56057e+07	1.27152e+07	1.77889e+07	1.4872e+07	1.20321e+07	1.2794e+07	1.65766e+07	1.75019e+07	1.52814e+07	1.46674e+07	1.48238e+07	1.33949e+07	1.03968e+07	1.16862e+07	1.36577e+07	1.28902e+07	1.34634e+07	1.60499e+07	1.19168e+07	2.25754e+07	1.5168e+07	1.83542e+07	1.61956e+07	1.6833e+07	1.60699e+07	1.6156e+07	1.59652e+07	1.33884e+07	1.59996e+07	1.9072e+07	1.61402e+07	2.05009e+07	1.55007e+07	1.69528e+07	1.58445e+07	1.62672e+07	1.29615e+07	2.2343e+07	2.00775e+07	1.97941e+07	1.83959e+07	2.13259e+07	1.99242e+07
AT1G15140.1	5.2475e+08	2.39928e+08	3.61256e+08	2.30204e+08	2.77573e+08	2.82387e+08	2.10802e+08	2.10995e+08	2.39229e+08	1.79762e+08	1.62705e+08	1.62692e+08	4.05953e+08	2.79205e+08	2.3705e+08	2.67795e+08	1.81566e+08	2.15197e+08	2.6719e+08	2.33586e+08	2.30534e+08	2.20787e+08	2.24472e+08	1.654e+08	2.77619e+08	2.59664e+08	232918354	3.06951e+08	4.12514e+08	3.2882e+08	2.09752e+08	1.93288e+08	2.40369e+08	2.18899e+08	2.23097e+08	2.04252e+08	3.71672e+08	2.90659e+08	2.17784e+08	1.85202e+08	2.18938e+08	1.35116e+08	2.63256e+08	1.99793e+08	1.95128e+08	1.54881e+08	3.4974e+08	2.52163e+08
AT1G15290.1	8.08643e+07	4.14073e+07	4.07865e+07	3.315e+07	1.11376e+08	120328267	5.24551e+07	6.52769e+07	6.3066e+07	6.74467e+07	73041388	8.33968e+07	1.61796e+08	1.35636e+08	6.38247e+07	5.20743e+07	9.28205e+07	9.55572e+07	9.30049e+07	9.51147e+07	1.29969e+08	1.36139e+08	9.04718e+07	7.80261e+07	6.0744e+07	5.45956e+07	1.07149e+08	9.07938e+07	1.06593e+08	1.04082e+08	8.91849e+07	8.09232e+07	1.25759e+08	1.08757e+08	1.00197e+08	88367355	1.52939e+08	1.40697e+08	9.64811e+07	8.53122e+07	7.11196e+07	4.57659e+07	1.60973e+08	1.0983e+08	9.27607e+07	7.68881e+07	9.19536e+07	7.60945e+07
AT1G15340.1	191269617	6.41583e+07	1.62053e+08	7.0474e+07	9.90178e+07	95255000	8.02415e+07	7.04537e+07	8.44848e+07	7.33978e+07	7.19437e+07	7.23011e+07	1.17892e+08	1.04789e+08	8.05662e+07	7.775e+07	1.24534e+08	8.77092e+07	1.0139e+08	7.73687e+07	7.50623e+07	5.44468e+07	8.92179e+07	8.65602e+07	7.85482e+07	6.60042e+07	6.66162e+07	7.81851e+07	3.17684e+08	1.7244e+08	9.13561e+07	6.09544e+07	8.38672e+07	6.50524e+07	7.31483e+07	6.48718e+07	1.02657e+08	8.36811e+07	7.4852e+07	5.03686e+07	7.97744e+07	5.2592e+07	5.41548e+07	4.9191e+07	6.94018e+07	4.27814e+07	1.21167e+08	7.07865e+07
AT1G15390.1	2.81224e+07	1.36337e+07	8.67104e+06	1.19573e+07	1.5327e+07	1.74827e+07	1.30257e+07	1.22771e+07	1.05618e+07	1.04568e+07	8.41367e+06	8.30281e+06	2.78164e+07	3.15616e+07	1.64092e+07	2.02988e+07	9.61665e+06	1.42352e+07	1.10118e+07	1.96385e+07	1.40237e+07	1.46332e+07	1.62054e+07	8.89932e+06	1.25658e+07	7.82269e+06	1.50681e+07	2.83882e+07	4.81564e+07	2.52506e+07	1.59956e+07	1.33269e+07	1.89816e+07	2.04989e+07	1.72167e+07	1.73538e+07	2.82117e+07	1.80294e+07	1.6291e+07	1.44153e+07	2.00945e+07	1.57053e+07	2.7371e+07	1.98212e+07	2.01066e+07	1.5963e+07	3.41484e+07	1.96224e+07
AT1G15440.1	2.37607e+07	6.92065e+06	1.33989e+07	4.37912e+06	1.69768e+07	1.45284e+07	6.65884e+06	5.91653e+06	7.03739e+06	5.97314e+06	8.54978e+06	7.36515e+06	9.08401e+06	7.67377e+06	8.0209e+06	7.09039e+06	5.49478e+06	3.63376e+06	6.90097e+06	6.55118e+06	1.15797e+07	9.49389e+06	1.27508e+07	5.71318e+06	8.2216e+06	6.51341e+06	9.69275e+06	6.97475e+06	9.39386e+06	6.04276e+06	9.27957e+06	8.40946e+06	8.20502e+06	1.10923e+07	9.90121e+06	7.85387e+06	1.17698e+06	1.17972e+07	7.19906e+06	8.76659e+06	1.45568e+07	1.11687e+07	1.24132e+07	1.33195e+07	7.86804e+06	4.73412e+06	1.72779e+07	4.31485e+06
AT1G15500.1	2.77089e+08	1.57149e+08	1.5687e+08	1.34063e+08	3.90813e+08	3.60708e+08	2.60175e+08	2.63664e+08	2.75028e+08	2.53975e+08	2.84064e+08	304864719	3.79197e+08	3.52678e+08	2.70674e+08	2.36345e+08	2.32841e+08	2.51898e+08	3.24044e+08	2.93417e+08	3.9395e+08	3.77312e+08	3.60041e+08	3.0494e+08	3.1415e+08	2.65944e+08	3.25326e+08	2.84714e+08	4.71704e+08	3.75645e+08	3.28662e+08	2.93089e+08	4.25232e+08	3.92177e+08	3.98459e+08	3.80176e+08	4.88192e+08	4.37123e+08	3.45946e+08	3.05467e+08	2.71667e+08	1.76558e+08	5.45826e+08	4.18758e+08	3.80493e+08	3.38004e+08	5.43236e+08	2.72971e+08
AT1G15690.1	6.80639e+08	3.76514e+08	5.3958e+08	3.43795e+08	5.31905e+08	5.28417e+08	4.126e+08	4.21654e+08	4.95839e+08	4.23833e+08	3.37287e+08	4.82867e+08	6.94735e+08	6.48206e+08	4.24687e+08	4.13513e+08	4.28936e+08	4.75371e+08	5.30491e+08	4.97498e+08	5.03387e+08	5.70543e+08	5.94643e+08	4.5858e+08	4.60318e+08	4.31216e+08	5.76818e+08	5.42309e+08	7.49872e+08	5.92828e+08	5.26958e+08	4.5246e+08	6.01096e+08	6.64055e+08	5.30147e+08	4.90745e+08	8.6828e+08	7.45498e+08	5.35738e+08	5.23192e+08	4.12393e+08	3.58409e+08	7.26384e+08	6.784e+08	6.07367e+08	5.47605e+08	6.90556e+08	4.36453e+08
AT1G15730.1	6.63792e+06	1.69687e+06	786818	963134	8.91638e+06	9.61449e+06	2.47563e+06	2.80349e+06	3.41872e+06	2.36468e+06	2.6992e+06	3.43347e+06	9.07294e+06	8412208	2.24138e+06	5.01458e+06	1.71949e+06	2.26268e+06	2.82223e+06	1.97726e+06	7.67053e+06	6.72997e+06	2.78186e+06	1.87375e+06	2.22793e+07	1.24372e+07	4.8771e+06	4318435	2.51156e+06	3.3089e+06	1.66312e+07	4.83518e+06	8.37131e+06	8.2584e+06	6.14826e+06	5.10353e+06	8.79598e+06	7.61088e+06	3.12633e+06	4.91779e+06	3.61677e+06	1.90374e+06	9052867	6.24207e+06	7.11333e+06	4.45196e+06	2.73842e+06	2.8924e+06
AT1G15750.4	1.05665e+08	4.40717e+07	3.51228e+07	4.22231e+07	7.10776e+07	7.36706e+07	4.69325e+07	4.3988e+07	5.83402e+07	3.39026e+07	4.49458e+07	4.12855e+07	8.1274e+07	6.60925e+07	3.7944e+07	4.71142e+07	4.27285e+07	4.87466e+07	4.62287e+07	3.99668e+07	4.95747e+07	4.59995e+07	4.24549e+07	3.20829e+07	5.66934e+07	5.89644e+07	6.22932e+07	5.75296e+07	1.16174e+08	7.45809e+07	3.79899e+07	3.74522e+07	5.6061e+07	5.20752e+07	57653986	4.3586e+07	1.14911e+08	9.31935e+07	5.38154e+07	5.08705e+07	4.80694e+07	2.709e+07	7.25198e+07	5.57144e+07	4.20885e+07	3.51029e+07	6.7904e+07	3.82204e+07
AT1G15820.1	1.6985e+09	8.90128e+08	1.00968e+09	6.52492e+08	1.54976e+09	1.50433e+09	5.61613e+08	6.09366e+08	8.72708e+08	7.74994e+08	4.44038e+08	5.61688e+08	1.58013e+09	1.34727e+09	6.42383e+08	7.06871e+08	5.038e+08	5.97096e+08	7.48758e+08	9.32624e+08	9.92824e+08	1.0065e+09	1.25698e+09	9.55691e+08	9.21463e+08	8.99842e+08	6.29657e+08	8.32475e+08	1.43276e+09	1.14048e+09	6.56079e+08	6.04046e+08	1.01302e+09	9.22198e+08	6.48423e+08	5.79536e+08	1.23172e+09	1.11144e+09	6.22651e+08	5.34592e+08	6.59307e+08	3.78674e+08	1.24473e+09	7.99753e+08	4.6445e+08	3.18769e+08	7.45338e+08	7.24842e+08
AT1G15860.3	2.05235e+06	1.56098e+06	836655	1.17595e+06	6.33799e+06	7.59496e+06	2947663	3.38017e+06	3.86413e+06	2.53561e+06	2.5134e+06	4.96319e+06	8.06091e+06	6.50766e+06	2.73177e+06	3.54887e+06	2.29049e+06	2.49323e+06	5.58491e+06	4.9426e+06	6.31302e+06	6.77122e+06	3.60724e+06	3.05014e+06	3.46807e+06	3.40484e+06	5.51714e+06	5.30576e+06	5.33011e+06	4967465	4.97464e+06	4.45324e+06	8.34132e+06	7.49128e+06	9.07116e+06	7.16542e+06	1.00057e+07	8817789	5.53203e+06	5.64437e+06	4.68874e+06	2.3189e+06	11068396	7.89126e+06	5.60221e+06	4.16433e+06	6686784	4.8446e+06
AT1G15930.1	4.44126e+08	1.90726e+08	9.84861e+08	5.11801e+08	3.74376e+07	3.76105e+07	1.61632e+08	5.12618e+07	155322922	1.52688e+07	2.04576e+07	2.18665e+07	6.18199e+07	4.10434e+07	2.0642e+07	2.49901e+07	1.86083e+07	1.99052e+07	41074976	3.19696e+07	3.67914e+07	3.46441e+07	25398879	2.19633e+07	6.59588e+08	4.85995e+08	30003171	27128037	1.10519e+08	9.40651e+07	33723554	3.02585e+07	4.31372e+07	3.82043e+07	4.35959e+07	3.86663e+07	52591924	49658617	3.3335e+07	27158216	1.75719e+07	1.05332e+07	4.60769e+07	3.5022e+07	2.92845e+07	1.92439e+07	104145253	71991411
AT1G15950.3	8.67616e+07	2.41602e+07	8.3677e+07	5.64024e+07	1.01722e+08	7.60938e+07	2.84666e+07	2.33451e+07	4.32081e+07	2.55959e+07	2.96499e+07	3.67905e+07	4.01507e+07	4.232e+07	2.63743e+07	2.23147e+07	2.96389e+07	2.32562e+07	3.25791e+07	3.15523e+07	4.84577e+07	4.29619e+07	3.5072e+07	2.83918e+07	8.16482e+07	6.75847e+07	2.80415e+07	2.61715e+07	4.47724e+07	3.46112e+07	3.98785e+07	3.00781e+07	4.65453e+07	3.92192e+07	7.65082e+07	3.5793e+07	6.50441e+07	8.1389e+07	6.2513e+07	2.8731e+07	2.91303e+07	2.01281e+07	5.33875e+07	3.15877e+07	3.38839e+07	3.04379e+07	6.4666e+07	3.76371e+07
AT1G15980.1	3.20985e+07	2.40232e+07	2.98146e+07	2.82996e+07	7.31008e+07	6.87014e+07	2.98109e+07	3.11219e+07	3.53343e+07	3.2851e+07	2.72864e+07	34638067	5.83812e+07	5.86817e+07	4.08147e+07	3.56293e+07	2.23915e+07	2.14653e+07	3.6303e+07	3.48951e+07	4.40098e+07	4.58978e+07	4.02538e+07	2.70744e+07	4.08994e+07	4.33181e+07	43447640	4.14071e+07	4.47303e+07	4.00207e+07	4.73764e+07	3.58952e+07	5.39688e+07	51164374	33147195	3.46798e+07	61634461	54847296	39129585	4.47197e+07	4.85659e+07	39331828	6.66665e+07	59013295	31499251	32293534	4.00647e+07	2.90599e+07
AT1G16030.1	5.6925e+06	4.12557e+06	958594	1.19865e+06	4325959	4.18611e+06	4.69799e+06	5.05316e+06	4420317	4.11655e+06	5.26281e+06	1.15673e+07	13294604	1.21945e+07	3.05286e+06	3.15277e+06	4197301	4.90139e+06	6.56718e+06	5.91557e+06	6.72385e+06	6230087	4756045	5.47895e+06	88243668	88587875		2.82037e+06	8540260	9.22246e+06	1.93495e+07	1.56834e+07			6.50295e+06	6.82862e+06	5.50676e+07	5.136e+07	1.18261e+07	1.58743e+07		3.90362e+06	5.89393e+07	5.11201e+07	2.12552e+07	1.98605e+07	4.30073e+07	2.74255e+07
AT1G16080.1	1.80104e+08	9.65004e+07	1.91251e+08	1.43532e+08	2.18649e+08	2.15079e+08	1.34183e+08	1.34206e+08	1.83558e+08	1.23169e+08	1.17228e+08	1.31335e+08	2.48565e+08	2.21125e+08	1.28783e+08	1.34631e+08	1.3171e+08	1.32658e+08	1.54783e+08	1.3785e+08	1.84788e+08	1.7982e+08	1.57745e+08	1.14864e+08	2.4108e+08	2.15889e+08	2.07095e+08	1.4778e+08	2.58145e+08	2.21431e+08	1.6441e+08	1.47741e+08	1.98108e+08	1.81408e+08	1.39815e+08	1.31412e+08	2.81119e+08	2.26097e+08	1.80906e+08	1.5261e+08	1.32159e+08	7.96835e+07	1.76036e+08	1.3681e+08	1.51949e+08	1.24779e+08	1.8106e+08	1.25333e+08
AT1G16210.1	8.08626e+07	2.5857e+07	5.84212e+07	3.44008e+07	5.21215e+07	4.45325e+07	2.9718e+07	2.98838e+07	3.84928e+07	3.51657e+07	2.8899e+07	3.83721e+07	5.11709e+07	4.71818e+07	3.76474e+07	3.54116e+07	3.17531e+07	3.19043e+07	3.57597e+07	3.3983e+07	4.71093e+07	40466207	4.56082e+07	3.505e+07	4.67988e+07	3.53361e+07	4.58429e+07	4.28015e+07	5.56396e+07	3.52569e+07	5.13805e+07	4.47697e+07	4.35552e+07	4.05699e+07	31501541	3.36513e+07	55141105	4.75774e+07	4.61968e+07	4.3549e+07	4.59208e+07	4.13577e+07	4.60331e+07	33919328	40819296	4.31097e+07	7.48698e+07	3.02124e+07
AT1G16270.3	1.76567e+06	1.17729e+06	482817	1.13354e+06	4.05809e+06	3.94326e+06	1.55672e+06	2.07703e+06	2.96871e+06	2.13497e+06	1.55178e+06	2.55994e+06	4.59064e+06	4.63071e+06	1.73467e+06	1.8016e+06	2.52457e+06	2.24559e+06	2.34306e+06	1.51909e+06	3.51417e+06	3.59378e+06	2.36409e+06	1931170	1.37791e+06	1.29729e+06	2.47652e+06	2.22808e+06	3.46223e+06	3.12984e+06	2.64325e+06	2.4844e+06	521855	3.9277e+06	3.8302e+06	3.74986e+06	5.17917e+06	914319	2.86817e+06	348524	2.52887e+06	1.21829e+06	724818	3.42118e+06	3.79668e+06	2.83824e+06	4.1252e+06	2.65836e+06
AT1G16300.1	6.14715e+06	3.64653e+06	1.06751e+06	1.2051e+06	6.26725e+06	5.63949e+06	4.4685e+06	4.31732e+06	5.46176e+06	5.41689e+06	4.97875e+06	5889339	8704239	8.16826e+06	2.97247e+06	2.48723e+06	6511431	6.66504e+06	6195707	4593297	10473213	8954811	5279108	4905013	1.40015e+06	1.23523e+06	3381666	3.00529e+06	11207776	7665375	1.72957e+06	1610648	3.47843e+06	3.44098e+06	2419955	2.72852e+06	4412863	3.34933e+06	2.01221e+06	1.53143e+06	1192117	658589	3695431	2.62766e+06	2316031	1.52697e+06	3.50525e+06	1894378
AT1G16340.4	55638.3		29481.1		245823		23495.9						272081	218006		28060.8								213710	329634					136335
AT1G16350.1	2.13352e+08	8.47911e+07	1.70219e+08	8.65921e+07	1.87631e+08	1.59321e+08	1.47035e+08	1.40432e+08	1.50756e+08	1.18298e+08	1.45734e+08	1.42383e+08	1.6732e+08	1.58613e+08	1.41489e+08	1.17703e+08	1.33433e+08	9.628e+07	1.56382e+08	1.31752e+08	2.2307e+08	2.18287e+08	1.58878e+08	1.29812e+08	1.33037e+08	1.28988e+08	1.51729e+08	136793663	1.60127e+08	113313579	1.91386e+08	1.69554e+08	1.98553e+08	1.88966e+08	1.71222e+08	1.70936e+08	2.4847e+08	1.75909e+08	1.65194e+08	1.53387e+08	1.56923e+08	1.27748e+08	213186422	1.80439e+08	2.07796e+08	1.76342e+08	2.80624e+08	1.57006e+08
AT1G16410.1	1.28192e+08	4.62513e+07	1.10998e+08	5.03654e+07	8.03833e+07	6.85072e+07	5.41671e+07	4.70971e+07	5.53464e+07	4.68838e+07	5.51693e+07	6.38944e+07	8.31844e+07	69334098	6.57169e+07	5.22862e+07	6.70719e+07	5.34518e+07	5.5754e+07	4.66276e+07	6.02335e+07	5.59621e+07	6.34772e+07	4.86903e+07	8.83007e+07	58664473	7.0221e+07	5.85484e+07	7.66901e+07	5.16251e+07	6.74914e+07	5.26668e+07	6.72499e+07	5.61845e+07	4.84508e+07	4.32787e+07	1.03377e+08	75713329	6.07383e+07	5.87344e+07	6.53086e+07	4.43689e+07	7.71684e+07	6.69427e+07	6.59352e+07	6.45518e+07	8.99079e+07	4.75426e+07
AT1G16460.2	25296891	9.88363e+06	2.43113e+07	3.92225e+06	1.65901e+07	2.18542e+07	3.57102e+07	5.55231e+06	7.28226e+06	4.13321e+07	3.01085e+07	1.82476e+07	16153578	1.79493e+07	2.77933e+07	3.49638e+07	5.00521e+06	5.40244e+06	2.6517e+07	2.34027e+07	1.60948e+07	1.57622e+07	7.30517e+07	5.13755e+06	7.86778e+06	6501250	1.62614e+07	1.35789e+07	1.38036e+07	1.16001e+07	2.08985e+07	1.94744e+07	2.6689e+07	2.57551e+07	2.38321e+07	1.98856e+07	2.99064e+07	2.34016e+07	1.84658e+07	1.63216e+07	1.97964e+07	1.45325e+07	2.58019e+07	1.7907e+07	1.96594e+07	1.55895e+07	2.15511e+07	1.55629e+07
AT1G16470.1	8.37255e+07	4.57934e+07	7.69576e+07	6.18546e+07	1.78558e+08	1.68785e+08	9.22086e+07	9.53264e+07	1.09837e+08	9.71971e+07	9.09928e+07	1.30092e+08	156067189	1.41719e+08	1.1551e+08	9.59146e+07	68975270	7.0382e+07	1.31246e+08	1.21437e+08	1.84959e+08	1.82279e+08	1.35145e+08	8.53332e+07	9.62209e+07	8.26513e+07	1.24914e+08	1.12878e+08	1.3975e+08	1.17539e+08	1.48415e+08	1.08086e+08	1.86598e+08	1.75626e+08	1.41931e+08	1.41001e+08	1.87398e+08	1.71294e+08	1.10187e+08	1.14761e+08	1.02113e+08	7.02573e+07	1.98132e+08	1.27747e+08	1.41298e+08	9.96892e+07	2.1774e+08	1.10987e+08
AT1G16700.1	2.22497e+07	1.47697e+07	1.59097e+07	1.31958e+07	4.40647e+07	4.18888e+07	2.3505e+07	2.51387e+07	2.60824e+07	2.33993e+07	2.55149e+07	2.89148e+07	3.95929e+07	3.45527e+07	2.43552e+07	2.12527e+07	23958847	2.00805e+07	3.17834e+07	2.96279e+07	3.90159e+07	3.86132e+07	3.25635e+07	2.36935e+07	2.37574e+07	2.08807e+07	2.63742e+07	2.55265e+07	3.36798e+07	3.41643e+07	2.8757e+07	2.47062e+07	4.83556e+07	4.36068e+07	3.26358e+07	3.13336e+07	4.07555e+07	4.22412e+07	2.93327e+07	2.47385e+07	2.19541e+07	1.6463e+07	4.91147e+07	4.0017e+07	3.19906e+07	2.52515e+07	3.56425e+07	2.50327e+07
AT1G16720.2	9.23081e+07	4.29266e+07	4.24596e+07	2.2274e+07	7.50001e+07	7.10833e+07	5.65928e+07	5.89237e+07	5.0648e+07	4.33442e+07	6.18023e+07	7.48514e+07	5.94185e+07	7.01316e+07	3.63579e+07	3.21764e+07	6.96872e+07	4.73989e+07	7.24293e+07	6.18255e+07	8.2296e+07	6.49071e+07	6.963e+07	6.01344e+07	5.83513e+07	5.35411e+07	6.72641e+07	8.63833e+07	9.51071e+07	6.30501e+07	6.88522e+07	7.21734e+07	7.83256e+07	7.67318e+07	6.66157e+07	4.96384e+07	1.15677e+08	9.86527e+07	5.70245e+07	7.79344e+07	7.57722e+07	4.60721e+07	8.7694e+07	8.19921e+07	8.55797e+07	5.49882e+07	1.0791e+08	6.88631e+07
AT1G16790.1	1.56525e+06	983445		609921	2.70855e+06	2.17479e+06	1.01281e+06	931599	1166506	962612	567067	1.01319e+06		3.10496e+06	1.04752e+06	1291261	1.24044e+06	1.12108e+06	1.45463e+06	1.48721e+06	1.47729e+06	996753	1.83122e+06	732128	1.75299e+06	1.40494e+06	1.92647e+06	1.09604e+06	2.7789e+06	2.51765e+06	1.68864e+06	1.60945e+06	3055991	2633639	2.50719e+06	2197999	3.33551e+06	3.15463e+06	2.3877e+06	1.81373e+06	1.43785e+06	1.12762e+06	4487843	2.92859e+06	1.2622e+06	727253	2.29795e+06	1.64422e+06
AT1G16880.1	5.73493e+08	3.75363e+08	4.97171e+08	3.74416e+08	9.318e+08	8.06356e+08	5.21074e+08	5.51416e+08	5.5417e+08	5.18523e+08	4.98325e+08	6.25652e+08	9.71822e+08	8.47366e+08	6.39983e+08	5.7529e+08	5.11373e+08	4.93924e+08	6.31371e+08	5.68751e+08	7.56592e+08	7.79557e+08	5.78015e+08	4.41512e+08	6.85901e+08	6.30664e+08	8.82428e+08	8.38889e+08	8.22216e+08	7.17887e+08	7.96987e+08	6.95791e+08	7.7685e+08	8.09506e+08	6.59094e+08	6.749e+08	5.0848e+08	1.0278e+09	7.47415e+08	7.69202e+08	6.63665e+08	5.06235e+08	9.0423e+08	7.77448e+08	7.48891e+08	6.96893e+08	8.56236e+08	6.11196e+08
AT1G16890.3	6.33047e+07	5.75568e+07	5.08864e+07	5.42669e+07	1.48546e+08	1.42437e+08	7.91476e+07	8.87078e+07	1.128e+08	8.56123e+07	9.14531e+07	1.06345e+08	161002902	1.47217e+08	8.61245e+07	8.80393e+07	7.14029e+07	7.4964e+07	9.53628e+07	7.25666e+07	1.40219e+08	1.37817e+08	1.05692e+08	7.11801e+07	7.94286e+07	8.37902e+07	1.29235e+08	1.16489e+08	1.41195e+08	1.2607e+08	1.18456e+08	1.12826e+08	1.48971e+08	1.45451e+08	1.37115e+08	1.30234e+08	194301920	1.81876e+08	1.17684e+08	1.23603e+08	1.09088e+08	6.72702e+07	216225980	1.68207e+08	1.45845e+08	1.33632e+08	1.67016e+08	1.24584e+08
AT1G16920.1	2.07135e+09	1.07775e+09	2.0276e+09	1.45034e+09	2.6652e+09	2.52282e+09	1.19683e+09	1.27266e+09	1.47583e+09	1.40058e+09	1.30218e+09	1.78464e+09	1.96601e+09	1.80017e+09	2.24683e+09	1.94626e+09	1.2604e+09	1.16224e+09	1.76318e+09	1.6557e+09	1.6899e+09	1.65837e+09	1.52213e+09	1.10822e+09	1.05395e+09	9.85843e+08	1.53931e+09	1.3552e+09	1.25054e+09	8.41651e+08	1.2386e+09	1.01836e+09	1.65048e+09	1.48883e+09	1.17052e+09	1.12827e+09	1.87327e+09	1.60528e+09	1.22418e+09	1.1915e+09	1.00199e+09	7.64384e+08	1.58618e+09	1.25668e+09	1.57362e+09	1.41247e+09	1.97491e+09	1.03283e+09
AT1G17050.1	2.28398e+07	1.17573e+07	2.19745e+07	1.26437e+07	1.95936e+07	1.75505e+07	1.62356e+07	1.42352e+07	1.7357e+07	1.58326e+07	1.62896e+07	1.58214e+07	1.93677e+07	1.85649e+07	1.95446e+07	1.48629e+07	1.95551e+07	1.71389e+07	1.65292e+07	1.36549e+07	1.92775e+07	1.95294e+07	1.78755e+07	1.65281e+07	1.35929e+07	1.59774e+07	1.42318e+07	1.15479e+07	1.69392e+07	1.69511e+07	1.56297e+07	1.37517e+07	1.20878e+07	1.52415e+07	1.84734e+07	1.56809e+07	1.45745e+07	1.4839e+07	1.31966e+07	1.5131e+07	1.6507e+07	1.35126e+07	1.83027e+07	1.8857e+07	1.77646e+07	1.6972e+07	1.9655e+07	1.50002e+07
AT1G17100.1	3.57079e+08	1.03281e+08	2.61838e+08	1.10859e+08	1.47856e+08	1.31681e+08	1.04967e+08	9.59843e+07	1.2223e+08	1.16321e+08	1.36145e+08	1.24618e+08	2.26681e+08	2.13415e+08	1.43188e+08	1.33992e+08	1.53866e+08	1.27227e+08	1.24977e+08	1.1423e+08	1.54326e+08	1.15659e+08	1.46003e+08	1.30657e+08	2.04643e+08	1.73835e+08	1.59107e+08	2.13134e+08	4.11985e+08	2.03402e+08	2.36921e+08	1.44613e+08	1.54217e+08	1.58094e+08	1.651e+08	1.67577e+08	1.91281e+08	1.49838e+08	1.85373e+08	1.40495e+08	1.92762e+08	1.35461e+08	1.8123e+08	1.3896e+08	1.57726e+08	1.28461e+08	2.62787e+08	1.40095e+08
AT1G17160.1	1.48077e+07	9.16706e+06	1.1614e+07	1.03217e+07	2.77017e+07	2.84256e+07	1.49161e+07	1.63957e+07	1.90725e+07	1.64986e+07	1.36946e+07	1.94191e+07	2.68628e+07	2.54885e+07	1.47322e+07	1.29778e+07	1.44199e+07	1.35581e+07	1.96409e+07	1.64195e+07	2.69855e+07	2.66179e+07	18982332	1.39453e+07	1.73735e+07	1.65028e+07	2.36032e+07	2.17846e+07	2.1839e+07	1.97774e+07	2.32611e+07	2.1015e+07	3.16696e+07	3.01229e+07	2.48073e+07	2.23542e+07	2.82117e+07	2.49786e+07	2.18244e+07	1.86896e+07	1.94049e+07	1.26375e+07	3.0041e+07	2.20686e+07	2.21876e+07	1.9569e+07	2.63867e+07	1.55449e+07
AT1G17170.1	1.76433e+07	1.50556e+07	16827286	12668806	37647020	3.83865e+07	3.3869e+07	3.75717e+07	4.182e+07	3.88883e+07	3.24964e+07	4.98363e+07	3.20889e+07	3.50749e+07	2.85175e+07	2.38946e+07	2.00375e+07	2.07372e+07	5.42115e+07	5.15552e+07	8.2618e+07	8.26736e+07	7.01417e+07	4.27498e+07	4.8344e+07	4.24628e+07	33939832	31240232	39488576	31838822	6.19654e+07	5.30485e+07	76523663	7.26962e+07	5.51442e+07	5.62629e+07	47223956	39160560	35060616	34600644	27158420	21829962	96279032	76124824	75125664	6.97421e+07	102678277	51586468
AT1G17180.1	1.06882e+07	9.67766e+06	5278934	5070045	29158383	2.22818e+07	1.36525e+07	1.46253e+07	1.80076e+07	1.60008e+07	1.74839e+07	2.3533e+07	2.01604e+07	2.06508e+07	14492182	1.24923e+07	9063344	9161769	2.74541e+07	25401427	53834606	53253937	33339088	2.62666e+07	15637906	1.31872e+07	1.2619e+07	12099727	1.61384e+07	15343069	22627976	2.02636e+07	31937041	3.1264e+07	4.09041e+07	39040022	20884304	1.87562e+07	14705352	1.53998e+07	1.37885e+07	8.8131e+06	36603713	25001991	21658127	18953764	58309846	3.8628e+07
AT1G17190.1	16996228	1.61826e+07	2.20913e+07	1.83146e+07	30351411	3.13982e+07	1.81075e+07	2.54849e+07	28321727	2.46306e+07	19905171	2.67973e+07	4.1985e+07	3.75942e+07	2.34326e+07	2.73159e+07	1.73099e+07	1.77267e+07	3.5704e+07	3.25261e+07	36162533	34812119	3.93421e+07	3.38022e+07	7.20913e+06	2.05193e+07	13598662	2.14203e+07	2.77858e+07	29946421	21955764	14510062	25334514	24999607	23938039	26181583	21239095	19896368	1.32791e+07	1.19441e+07	1.00917e+07	6.15564e+06	25064319	1.99986e+07	17727620	14075415	3.83375e+07	35647153
AT1G17210.1	1.32925e+07	3.04094e+06	8.44527e+06	1.22664e+06	5.82266e+06	6.91348e+06	1.29065e+06	4.17008e+06	3.79392e+06	4.1141e+06	3.98006e+06	4.19523e+06	1.0373e+07	5.74409e+06	3.53972e+06	1.79124e+06	5.19241e+06	4.80798e+06	3.18616e+06	2.14177e+06	5.73355e+06	8135514	5.45747e+06	4.92424e+06	2.73062e+06	3.30695e+06	3.84947e+06	4.31403e+06	1.13019e+07	5.29147e+06	4.80964e+06	3359671	3.46501e+06	5.23562e+06	5.27711e+06	5.92722e+06	1.27942e+07	6.76633e+06	7.79072e+06	5.44451e+06	6.29121e+06	4.38317e+06	6539481	6714247	5.67971e+06	4.68775e+06	8.47289e+06	3.22089e+06
AT1G17220.1	2.09564e+08	9.58783e+07	2.14435e+08	1.23459e+08	1.6591e+08	1.46445e+08	1.20406e+08	1.09899e+08	1.40335e+08	1.26895e+08	1.13431e+08	1.24821e+08	2.02507e+08	1.8031e+08	1.24056e+08	1.31692e+08	1.41316e+08	1.03805e+08	1.28998e+08	1.15969e+08	1.53077e+08	1.34665e+08	1.46936e+08	1.10388e+08	1.73361e+08	1.20907e+08	1.33841e+08	1.40575e+08	2.91633e+08	1.87115e+08	1.48714e+08	9.50684e+07	1.62151e+08	1.38912e+08	1.19709e+08	9.41374e+07	2.279e+08	1.69064e+08	1.25476e+08	1.24007e+08	1.19411e+08	7.92319e+07	1.94345e+08	1.43082e+08	1.25025e+08	1.08016e+08	2.09955e+08	1.06515e+08
AT1G17290.1	4.31103e+08	2.36381e+08	3.06464e+08	2.24878e+08	4.55185e+08	4.15166e+08	3.83118e+08	3.79033e+08	4.17942e+08	3.1196e+08	3.75835e+08	4.25594e+08	4.77306e+08	4.24351e+08	2.99172e+08	2.96684e+08	3.06841e+08	2.87817e+08	4.70737e+08	4.03134e+08	5.69579e+08	5.54698e+08	4.34865e+08	3.50469e+08	4.13773e+08	3.85434e+08	3.69261e+08	3.48492e+08	4.94815e+08	4.63419e+08	4.00076e+08	3.71034e+08	5.07526e+08	4.9816e+08	4.78018e+08	4.45404e+08	5.43239e+08	4.77866e+08	3.5443e+08	3.49033e+08	3.34658e+08	2.29882e+08	6.42239e+08	5.14243e+08	5.04041e+08	4.28767e+08	6.59906e+08	4.44231e+08
AT1G17370.1	5.29831e+07	2.47269e+07	1.8844e+07	2.13997e+07	82265357	8.40761e+07	3.96031e+07	4.48235e+07	60404614	3.88779e+07	4.42439e+07	5.19811e+07	1.0377e+08	78630153	4.19942e+07	4.79596e+07	48281751	4.95431e+07	6.24715e+07	5.4192e+07	79138964	7.77223e+07	5.25397e+07	4.1314e+07	4.21738e+07	3.63054e+07	5.81813e+07	5.52635e+07	5.03525e+07	5.60857e+07	6.34579e+07	57300005	8.55168e+07	8.16215e+07	7.32717e+07	6.81886e+07	121612858	1.08848e+08	6.30231e+07	57634208	5.74244e+07	3.27954e+07	1.094e+08	7.85018e+07	6.6256e+07	4.75685e+07	9.26221e+07	5.74737e+07
AT1G17470.2	6.57287e+07	3.07889e+07	5.13846e+07	2.35495e+07	3.71758e+07	6.88791e+07	2.46966e+07	4.2741e+07	5.02032e+07	3.95199e+07	3.27188e+07	2.38016e+07	6.99574e+07	7.22149e+07	3.17444e+07	3.9818e+07	2.16022e+07	2.8877e+07	5.23995e+07	3.88469e+07	5.64772e+07	3.03641e+07	5.47213e+07	2.45569e+07	4.47846e+07	3.91902e+07	3.23792e+07	6.89069e+07	6.20679e+07	5.20186e+07	3.74664e+07	2.633e+07	4.03458e+07	3.90196e+07	4.03592e+07	3.37047e+07	8.56356e+07	4.52233e+07	3.60938e+07	2.89483e+07	2.6254e+07	1.45707e+07	4.34523e+07	3.6627e+07	3.1886e+07	2.44583e+07	9.36024e+07	5.22368e+07
AT1G17580.1			997580									507899											972193	954915		798404						1.20417e+06	1.17796e+06		1.21059e+06					562671		1.20296e+06			478635	353004		385011
AT1G17650.1	9.29433e+07	6.09004e+07	7.13154e+07	4.90037e+07	7.86412e+07	7.66304e+07	6.69928e+07	7.83527e+07	8.95449e+07	5.83021e+07	5.75611e+07	6.28757e+07	1.32373e+08	1.20911e+08	7.78931e+07	8.34953e+07	7.51026e+07	9.94022e+07	8.5221e+07	9.20859e+07	8.8137e+07	8.67854e+07	9.53805e+07	7.96179e+07	8.00505e+07	6.8403e+07	7.28283e+07	9.39427e+07	1.28209e+08	1.11143e+08	9.96756e+07	7.07722e+07	7.58789e+07	6.77515e+07	5.31636e+07	4.89864e+07	9.2891e+07	7.14427e+07	6.19952e+07	5.49655e+07	5.00317e+07	6.60846e+07	7.84808e+07	5.55303e+07	6.53525e+07	6.89935e+07	9.84608e+07	7.34719e+07
AT1G17720.1	1.64304e+06			53092.3			597035	47522.7	158058	46950	763002					63683.5			156338	778024			891512	585577	790644	713451										1.11513e+06	667800	449405		33875.1			1.83749e+06		1.73898e+06		3.23561e+06	1.59407e+06
AT1G17745.2	1.3425e+08	6.9077e+07	1.41463e+08	8.06991e+07	7.41683e+07	57070664	8.67519e+07	7.55651e+07	80446777	6.75532e+07	7.65272e+07	8.24611e+07	87511172	75330797	7.95034e+07	7.05864e+07	67808981	6.55502e+07	8.41312e+07	7.50355e+07	8.97501e+07	81576764	9.28719e+07	75492203	102618343	9.58376e+07	6.60278e+07	68414880	8.20119e+07	5.64489e+07	7.07471e+07	5.36169e+07	4.83795e+07	7.07684e+07	6.23586e+07	5.89611e+07	76976271	6.02662e+07	5.32981e+07	62397842	58795047	37748313	7.3417e+07	61323448	7.25699e+07	79153186	1.03915e+08	6.35516e+07
AT1G17840.1	29528833	1.30301e+07	21962316	6550732	9.58922e+06	6574912	8.49438e+06	9957859	8.8544e+06	21063174		16817782	22527803	2.28647e+07		15508519	11443860	15220590	9084479	21967434	2.75243e+06		26220160	20576174	1.19104e+07	1.09718e+07		6.06252e+06	1.9616e+07	7.73849e+06	12685032	7878430	3.16871e+06					6.10096e+06		5065907	3.9607e+06	7.42608e+06				14252005	13052769	8.64432e+06
AT1G17860.1	7.6946e+06	4.34677e+06	5.07655e+06	3.77967e+06	5.7127e+06	4.64364e+06	5.15051e+06	4.56138e+06	4.81198e+06	4.65131e+06	4.85406e+06	4.84365e+06	5.5713e+06	4.40967e+06	4.62589e+06	4.73077e+06	4.66872e+06	4.75276e+06	5.02845e+06	4.37579e+06	4359752	4.60485e+06	3.48101e+06	4.44283e+06	4.58153e+06	4.5714e+06	4.15057e+06	3.65339e+06	5.89001e+06	4.15171e+06	3.09618e+06	3.03517e+06	4.63162e+06	3.41061e+06	3.94343e+06	3.6046e+06	3.57605e+06	3.11255e+06	3449201	3.02534e+06	4220703	2.60942e+06	3.74906e+06	2.25714e+06	4.74745e+06	3.64957e+06	4.7132e+06	3.12351e+06
AT1G17880.1	1.38189e+06	1.08963e+06	1.81595e+06	1.08021e+06	4.14343e+06	5.70225e+06	830353	1.07038e+06	755143	832508	1.33746e+06	1.41207e+06	2.2936e+06	1.90894e+06	1.5452e+06	1.38824e+06	997270	900280	1.0818e+06	1.36096e+06	2.00065e+06	2.04949e+06	1.21231e+06	1.21864e+06	2.00813e+06	1.70725e+06	2.80743e+06	2.04809e+06	1.47529e+06	2.23307e+06	4.20423e+06	3.93782e+06	5.11912e+06	4.04189e+06	2.93538e+06	2.34967e+06	5.35026e+06	4.89939e+06	6.26363e+06	5.31884e+06	2.36714e+06	1.38621e+06	4.70188e+06	3.6787e+06	1.89585e+06	1.56663e+06	3.59239e+06	2.85365e+06
AT1G17890.1	2.66845e+08	1.40119e+08	2.5249e+08	1.56678e+08	2.67567e+08	2.18176e+08	1.85789e+08	1.78057e+08	1.84845e+08	1.80609e+08	1.93427e+08	2.15566e+08	242194523	2.04542e+08	1.98323e+08	1.92685e+08	1.7278e+08	1.5831e+08	2.11648e+08	1.93253e+08	2.28888e+08	2.28282e+08	2.09893e+08	1.80073e+08	2.36338e+08	2.3333e+08	2.40584e+08	2.56845e+08	2.72067e+08	2.14895e+08	2.37865e+08	2.22928e+08	2.38776e+08	2.67067e+08	2.3107e+08	2.19085e+08	2.18234e+08	2.82625e+08	2.29928e+08	2.11688e+08	2.08121e+08	1.59594e+08	2.85397e+08	2.50736e+08	2.53559e+08	2.37069e+08	3.54995e+08	2.5702e+08
AT1G18070.3	3.4554e+08	1.60371e+08	3.57616e+08	2.48128e+08	1.69006e+08	1.35907e+08	1.64982e+08	1.81043e+08	2.02859e+08	1.55768e+08	1.3556e+08	1.67727e+08	2.10038e+08	1.85079e+08	1.46807e+08	1.46254e+08	7.73553e+07	9.33022e+07	1.73523e+08	1.67922e+08	1.76776e+08	1.63104e+08	1.74855e+08	1.40876e+08	3.2125e+08	258856513	1.23759e+08	1.45158e+08	2.54036e+08	1.96333e+08	2.47166e+08	2.11441e+08	2.12307e+08	1.43389e+08	2.29553e+08	1.4594e+08	1.64516e+08	1.43794e+08	1.50259e+08	1.80884e+08	1.41322e+08	1.65134e+08	1.86569e+08	1.47576e+08	2.18538e+08	1.69983e+08	2.58287e+08	2.02536e+08
AT1G18080.1	2.71173e+09	1.84802e+09	1.92827e+09	1.50884e+09	3.95443e+09	3.88225e+09	2.36945e+09	2.48297e+09	2.7763e+09	2.35835e+09	2.31696e+09	2.87365e+09	4.19383e+09	3.94515e+09	2.62727e+09	2.5264e+09	2.24549e+09	2.32128e+09	3.11201e+09	2.78668e+09	4.09174e+09	4.08758e+09	2.92593e+09	2.24795e+09	2.31255e+09	2.20119e+09	2.75176e+09	2.63415e+09	3.62012e+09	3.29783e+09	2.66562e+09	2.43094e+09	3.47196e+09	3.36196e+09	2.8617e+09	2.81216e+09	4.33231e+09	3.91428e+09	2.7303e+09	2.52453e+09	2.57853e+09	1.80927e+09	4.17438e+09	3.09197e+09	3.19353e+09	2.44224e+09	4.53691e+09	2.90742e+09
AT1G18150.3	5.36738e+06	1.08506e+06			9101269	5.75274e+06	4.27967e+06	1.45069e+06	3321076	2.95159e+06	4.41593e+06	5071725	1.47631e+06	2.06363e+06	3.54989e+06	4.26962e+06	3.28029e+06	3.22769e+06	3.96502e+06	1.63152e+06	5.21279e+06	3.86326e+06	3.59777e+06	4519186		2.08251e+06	4.29943e+06	4.24242e+06			7.8511e+06	4171153	8360345	4.16846e+06	6.15921e+06	5.69376e+06	9.86351e+06	6404551	8.08202e+06	5.18543e+06	7.42987e+06	3.69458e+06	4.29858e+06	2.31158e+06	3.44618e+06	1.99063e+06	6.56425e+06	1.45568e+06
AT1G18210.1	1.04874e+08	2.35129e+07	3.93012e+07	1.47649e+07	4.72342e+07	4.72568e+07	3.48772e+07	2.75503e+07	3.13189e+07	2.15791e+07	3.9566e+07	33244601	4.37742e+07	3.74706e+07	2.45299e+07	1.72331e+07	43306202	31314352	3.78054e+07	27709916	5.49895e+07	5.24253e+07	42166500	35895950	3.02385e+06	2.64834e+06	3.60618e+07	2.62333e+07	1.39555e+07	5.95645e+06	3.68872e+07	31604994	6.0079e+07	48960576	48499753	3.79837e+07	7.72541e+07	5.33067e+07	3.98967e+07	2.98434e+07	33700090	1.91716e+07	7.52488e+07	43418792	4.98285e+07	31831583	6.35893e+07	3.59552e+07
AT1G18260.1	83180.9	107600	102501	104403	219547	256660	188908	172370	169600	189350	191387	193338	185432	177921	131760	153212	153530	136371	169314	191271	219986	264882	262983	225432	363231	363944	408966	359757	173636	177039	582683	520314	624436	566121	359790	388503	641365	549887	491572	417720	294424	234185	899390	799958	505206	374887	280625	265661
AT1G18270.3	60181191	1.95533e+07	5.91162e+07	2.92359e+07	3.91958e+07	3.90261e+07	4.11386e+07	4.48602e+07	5.4947e+07	3.82613e+07	3.26045e+07	4.52366e+07	6.24189e+07	4.97093e+07	3.03676e+07	3.32691e+07	3.25248e+07	3.56717e+07	65871293	4.54005e+07	5.71532e+07	5.89912e+07	5.906e+07	4.91484e+07	5.65803e+07	4.08533e+07	41837135	2.67722e+07	7.73345e+07	6.69165e+07	4.20287e+07	4.13122e+07	7.06427e+07	6.92788e+07	6.18134e+07	5.67314e+07	3.75332e+07	4.34543e+07	3.97793e+07	3.43143e+07	2.55721e+07	1.80234e+07	8.32902e+07	5.69564e+07	6.22089e+07	4.50566e+07	9.67868e+07	3.55914e+07
AT1G18450.1	8.64999e+07	3.8064e+07	6.83737e+07	3.16594e+07	5.94097e+07	5.46144e+07	3.21979e+07	3.89032e+07	4.98229e+07	5.66097e+07	3.48944e+07	5.22664e+07	9.54806e+07	9.39962e+07	3.83034e+07	5.17072e+07	3.70037e+07	5.3864e+07	4.38365e+07	5.69937e+07	4.84826e+07	44299789	7.33505e+07	5.56822e+07	5.10765e+07	4.18292e+07	6.037e+07	5.68158e+07	1.02295e+08	5.75019e+07	7.9693e+07	6.86979e+07	8.76416e+07	5.62123e+07	8.47093e+07	5.93247e+07	2.56666e+07	4.73338e+07	6.16919e+07	6.52357e+07	5.72054e+07	6.72812e+07	7.26125e+07	4.60487e+07	6.19669e+07	4.60524e+07	7.32712e+07	5.03064e+07
AT1G18500.1	2.90528e+08	9.06977e+07	1.62132e+08	7.45534e+07	1.4225e+08	1.08442e+08	1.0162e+08	9.38548e+07	1.15329e+08	1.154e+08	1.26336e+08	1.44206e+08	1.52229e+08	1.44942e+08	1.19597e+08	1.47661e+08	1.21135e+08	1.12693e+08	1.05646e+08	1.04982e+08	1.10441e+08	1.17977e+08	1.43692e+08	1.30406e+08	1.02738e+08	8.82565e+07	1.20053e+08	1.11039e+08	1.21076e+08	9.09488e+07	1.59537e+08	1.52641e+08	1.65348e+08	1.05556e+08	1.37863e+08	1.32148e+08	1.53162e+08	9.50047e+07	1.27506e+08	1.52757e+08	1.68216e+08	1.5105e+08	1.87357e+08	1.02669e+08	1.83103e+08	1.86616e+08	2.04012e+08	1.18298e+08
AT1G18540.1	5.97311e+09	2.04384e+09	3.79434e+09	2.04335e+09	1.77967e+09	1.80047e+09	2.02363e+09	1.91581e+09	2.10344e+09	1.79511e+09	1.77047e+09	2.18036e+09	2.55425e+09	2.23095e+09	2.05947e+09	1.99087e+09	1.99962e+09	2.03092e+09	2.25134e+09	1.97413e+09	1.86363e+09	2.05916e+09	2.72079e+09	2.21006e+09	2.37386e+09	2.23964e+09	1.91929e+09	1.9235e+09	3.59949e+09	2.386e+09	1.92243e+09	1.69617e+09	2.14592e+09	1.92483e+09	1.95936e+09	1.67885e+09	2.24539e+09	1.79073e+09	1.84563e+09	1.71096e+09	1.7424e+09	1.50141e+09	2.37702e+09	1.98696e+09	2.3109e+09	1.91276e+09	3.39474e+09	2.19709e+09
AT1G18590.1	3.95299e+06	1.36254e+06	2.58192e+06	497230	4.60688e+06	7.75402e+06	1.22706e+06	2.44161e+06	1.38133e+06	2.16765e+06	2.16783e+06	2.57612e+06	5.25296e+06	4.7642e+06	1.5642e+06	2.0878e+06	1.67664e+06	1.89718e+06	1.50364e+06	2.28638e+06	2.92055e+06	1.02151e+07	1.77851e+06	2.83627e+06	2.44298e+06	1.73379e+06	4.59274e+06	3080254	3.27251e+06	3.13255e+06	4.10281e+06	3.88119e+06	5.17354e+06	5.41405e+06	6.89735e+06	5.47069e+06	1.32743e+07	1.0504e+07	5.22395e+06	3.51397e+06	3089613	2.55079e+06	7.47496e+06	4.64705e+06	3.62554e+06	2.0525e+06	4.28006e+06	3.55288e+06
AT1G18640.2	4.25133e+07	1.52365e+07	3.13322e+07	3.92039e+07	6.4648e+07	6.28756e+07	2.77539e+07	2.98203e+07	3.25717e+07	2.79783e+07	3.05307e+07	3.41489e+07	6.82407e+07	6.01751e+07	3.2062e+07	2.98558e+07	3.30471e+07	3.50343e+07	2.12227e+07	2.0469e+07	5.31786e+07	5.41256e+07	3.23467e+07	2.87176e+07	4.83885e+07	3.38048e+07	4.62174e+07	4.12061e+07	7.70937e+07	58290508	4.34407e+07	3.91748e+07	6.02634e+07	4.84011e+07	2.41034e+07	3.99168e+07	7.65027e+07	6.68323e+07	4.8153e+07	4.43302e+07	3.63343e+07	2.17954e+07	6.42459e+07	4.28716e+07	4.3788e+07	3.46459e+07	4.94043e+07	3.13727e+07
AT1G18720.1		298382	238598	241604	1.62909e+06	1.07735e+06	321558	647850	755828	804230	886488	904047	1.05278e+06	1.34026e+06	740221	49489.3	655425	959114	1.11504e+06	1.9197e+06	992407	1.44611e+06	1.44618e+06	1.02299e+06	1.27464e+06	856255	1.65454e+06	1513421	2.11855e+06	1.78124e+06	3071778	2.43351e+06	4.97325e+06	3.82361e+06	4755588	2.58094e+06	4421691	3.63438e+06	3.00451e+06	2.11567e+06	860680	397565	7.47862e+06	4455295	2.75526e+06	1.15042e+06	1.63438e+06	1.61688e+06
AT1G18800.1	7.92613e+06	3.18472e+06	7.93014e+06	5.17656e+06	10803586	8997469	3.62821e+06	4.09178e+06	3.85544e+06	4.30972e+06	4.46208e+06	6.61124e+06	8617602	8.33369e+06	10111999	8589374	4.5106e+06	3753681	5188289	5.17034e+06	8444811	8.13787e+06	8.36692e+06	5666959	4.73823e+06	4672993	7586050	5490341	4749924	3.33324e+06	9184217	7.24973e+06	5844959	6662919	6040858	6.60527e+06	9097998	7.52944e+06	6.19241e+06	8053002	8735544	7.30311e+06	9020042	5890943	6390731	5948918	12352692	6975053
AT1G18980.1	2.03442e+06	96990.7	3896302	1.98464e+06	4.70956e+06	6.93538e+06	4.35278e+06	4.41388e+06	5.15759e+06	2.54518e+06	3.53544e+06	3.99155e+06	7.84116e+06	5.24799e+06	3.90954e+06	5.64832e+06	3.05833e+06	2.79652e+06	5.29976e+06	4.38346e+06	6.66522e+06	6.64895e+06	5.55107e+06	4.41888e+06	3.47395e+06	2.75998e+06	1.0722e+06	3.90088e+06	878014	5.84967e+06	6.19502e+06	897277	1.75271e+06	1.67568e+06	1.07242e+07	1.90592e+06	1.2984e+06	1.56315e+06	1.1862e+06	5.72685e+06	411596	2.9282e+06	3.13386e+06	2.37418e+06	975352	4.34379e+06	5.55695e+06	4.30342e+06
AT1G19140.2	1.54733e+06	243355	400551		250662	142114	232291	60126.9	186424	147662	208613	270158	256974	312684	259529	216418	327697	223941	274347	139202	180035	110768	467978	720682	264472	362388	222494	196384	6911304	1.07248e+06	754096	583593	1.04322e+06	396458	530568	423482	4081.89	568085	218575	246440	534005	619540	1.00968e+06	969006	263748	172148	881566	137435
AT1G19570.1	6.15296e+08	3.89682e+08	6.24864e+08	4.50684e+08	1.30261e+09	1.30216e+09	6.21777e+08	6.45204e+08	7.00352e+08	6.32905e+08	6.6733e+08	8.27658e+08	1.14349e+09	1.06593e+09	7.22431e+08	6.49904e+08	5.32247e+08	5.33875e+08	8.50563e+08	8.29174e+08	1.11776e+09	1.10921e+09	9.14206e+08	6.32566e+08	7.09067e+08	6.84428e+08	9.87495e+08	8.89111e+08	9.54016e+08	8.16014e+08	1.17113e+09	8.9405e+08	1.10994e+09	1.18017e+09	8.03799e+08	8.26089e+08	1.53252e+09	1.42001e+09	8.91412e+08	9.01589e+08	7.02557e+08	4.91961e+08	1.17554e+09	8.74203e+08	7.78123e+08	6.87623e+08	1.16536e+09	6.86795e+08
AT1G19835.6	3.52003e+08	1.45004e+08	2.17786e+08	9.27442e+07	2.84051e+07	2.26364e+07	1.03845e+08	9.27315e+07	1.19367e+08	8.9423e+07	7.76199e+07	6.72922e+07	1.27971e+08	9.91677e+07	8.05428e+07	9.55723e+07	9.23728e+07	1.19536e+08	1.03711e+08	90779600	1.84842e+07	2.47096e+07	1.18974e+08	9.93168e+07	1.35955e+08	1.095e+08	2.7954e+07	1.54374e+08	3.50171e+08	2.12084e+08	6.09676e+07	14573106	1.64603e+07	2.64876e+07	2.1712e+07	1.16015e+07	37213752	3.67353e+07	2.44203e+07	1.64132e+07	1.34425e+07	1.24605e+07	2.66046e+07	3.17131e+07	1.68375e+07	1.80246e+07	107289682	1.04225e+08
AT1G19920.1	4.10421e+08	1.97922e+08	3.36827e+08	2.09631e+08	4.15918e+08	3.66917e+08	2.79512e+08	2.83612e+08	3.40253e+08	2.95909e+08	3.08316e+08	3.3199e+08	473363558	3.76365e+08	3.27798e+08	3.02939e+08	2.89422e+08	2.77123e+08	3.49539e+08	3.2385e+08	4.0897e+08	3.89455e+08	3.90176e+08	3.03215e+08	2.93455e+08	2.80004e+08	3.15463e+08	3.01405e+08	5.31556e+08	3.352e+08	3.43848e+08	3.1254e+08	3.69398e+08	3.73524e+08	3.07018e+08	2.9022e+08	4.65286e+08	3.91351e+08	3.06252e+08	2.90445e+08	3.12588e+08	2.52158e+08	3.94426e+08	323099581	3.64653e+08	3.18721e+08	5.0497e+08	2.88783e+08
AT1G20010.1	6.16638e+08	2.26153e+08	3.76599e+08	2.15009e+08	5.84319e+08	5.86431e+08	4.8217e+08	5.07447e+08	5.59518e+08	5.05935e+08	4.93004e+08	5.15301e+08	7.13926e+08	6.78298e+08	4.51019e+08	3.98358e+08	6.53805e+08	3.78012e+08	5.63173e+08	5.17567e+08	7.06846e+08	6.40694e+08	5.27381e+08	3.21679e+08	2.06218e+08	1.81236e+08	3.40189e+08	3.00392e+08	4.12187e+08	3.60895e+08	3.03611e+08	2.61339e+08	3.44332e+08	3.1353e+08	3.05452e+08	2.91856e+08	4.27188e+08	3.50145e+08	2.8491e+08	2.60316e+08	2.48042e+08	1.67964e+08	3.3005e+08	3.12541e+08	2.97637e+08	2.80025e+08	4.39205e+08	2.02961e+08
AT1G20020.1	1.47005e+09	4.82841e+08	8.55461e+08	3.27248e+08	5.49763e+08	4.2356e+08	3.72441e+08	3.71992e+08	3.83997e+08	3.93958e+08	3.38684e+08	3.53267e+08	6.67507e+08	6.69077e+08	4.25981e+08	4.55036e+08	4.35242e+08	4.38569e+08	3.90747e+08	4.23513e+08	4.14915e+08	3.55382e+08	5.27733e+08	5.33341e+08	4.65917e+08	3.80228e+08	4.51497e+08	4.306e+08	8.34755e+08	4.64577e+08	5.12704e+08	4.49739e+08	5.68935e+08	3.55419e+08	3.84983e+08	2.75511e+08	4.29634e+08	3.62333e+08	4.58038e+08	4.71622e+08	4.27455e+08	4.31636e+08	4.61632e+08	2.47645e+08	3.77478e+08	3.56024e+08	5.5659e+08	3.50795e+08
AT1G20020.2			8.06913e+06	5.20324e+06	10373444	8.34401e+06	7081027		6655600		8.3096e+06					5.19072e+06			6.61536e+06		11459848	10159063							16945266	13572157					8300292		9549709		6.63543e+06		6.45833e+06	6.00253e+06		6.00253e+06
AT1G20050.1	5.99608e+06	2.12677e+06	1.3088e+06	1.40471e+06	9.61774e+06	5.76138e+06	8.43015e+06	5.63726e+06	5.54324e+06	4.36971e+06	7.06028e+06	5.72018e+06	6.95003e+06	5.63869e+06	2.57423e+06	3.18306e+06	3.64404e+06	3.40483e+06	8.48601e+06	5498841	8.57705e+06	7.77825e+06	5.69492e+06	5.79249e+06	3.92667e+06	4.29061e+06	1.02564e+07	4.43399e+06	6.22866e+06	5.46026e+06	1.64921e+07	1.33447e+07	2.17226e+07	1.78823e+07	18624995	1.57265e+07	2.00577e+07	1.56897e+07	1.2282e+07	9.53275e+06	8.3352e+06	2.01646e+06	2.56016e+07	1.60339e+07	1.93642e+07	1.19541e+07	1.7637e+07	9.98355e+06
AT1G20110.1	2.47677e+07	8.78756e+06	2.14924e+07	1.09925e+07			7.91335e+06	7.66292e+06	1.25623e+07	1.47196e+07	9.13651e+06	9.491e+06	20409564	21309678	7.03254e+06	14167948	6333772	8053799	8.6965e+06	13583743	4308425		1.49345e+07	1.71593e+07	1.66642e+07	1.31315e+07		1.72486e+07	2.47282e+07	16619998	2.37365e+07	128106			1.31858e+06	610581	1.88954e+06				8.30694e+06	7.32952e+06		344273	696618	5.537e+06	1.51872e+07	16262412
AT1G20190.1	1.02226e+08	6.31244e+07	9.05631e+07	87190670	125690966	122417378	77359725	8.11305e+07	94792711	84560395	8.90875e+07	107839853	1.212e+08	111286804	117357657	117632196	89143524	89352351	124541849	114078957	127718068	130150998	124732179	8.62885e+07	89791949	87050984	151559604	141441829	9.35101e+07	120669154	118329864	105244366	142241670	120943183	84661000	86472532	1.50518e+08	144512270	110950842	106926895	9.24778e+07	81505447	141184683	115426138	1.15797e+08	1.24067e+08	116821956	88117413
AT1G20200.1	6.17457e+08	3.59116e+08	3.83029e+08	2.83219e+08	5.54346e+08	4.74178e+08	5.10663e+08	5.64047e+08	6.90465e+08	6.05095e+08	4.99537e+08	6.23754e+08	876566387	8.19321e+08	4.467e+08	4.68882e+08	4.29932e+08	5.80325e+08	6.00211e+08	6.90866e+08	7.62685e+08	6.82775e+08	7.07023e+08	5.71018e+08	4.82888e+08	4.42713e+08	4.34828e+08	5.56647e+08	8.59534e+08	7.84586e+08	6.4917e+08	5.61621e+08	7.05165e+08	5.7751e+08	5.66363e+08	5.45415e+08	5.28577e+08	5.81027e+08	4.21439e+08	5.12113e+08	4.36534e+08	3.8189e+08	7.9292e+08	5.43988e+08	6.10107e+08	5.54951e+08	8.74385e+08	5.81643e+08
AT1G20220.1	1.96516e+08	7.28788e+07	1.36305e+08	8.48596e+07	1.28282e+08	1.19555e+08	94175751	9.50735e+07	1.12236e+08	8.39229e+07	9.2252e+07	8.77117e+07	1.43562e+08	1.18209e+08	1.19192e+08	1.04466e+08	7.37243e+07	7.94373e+07	1.21176e+08	1.06334e+08	1.23257e+08	1.15602e+08	1.21996e+08	7.80541e+07	2.05693e+08	1.69446e+08	9.75682e+07	1.49504e+08	2.11375e+08	1.36139e+08	1.13763e+08	7.53896e+07	9.91047e+07	9.51265e+07	8.23958e+07	8.25555e+07	1.52257e+08	1.25675e+08	9.1824e+07	8.88334e+07	99755334	6.42779e+07	1.32039e+08	1.06141e+08	9.22812e+07	8.27949e+07	2.34655e+08	1.01758e+08
AT1G20230.1	31057415	28753179	1.58189e+07	16438023	5.84005e+07	6.07728e+07	3.07959e+07	3.35712e+07	3.68212e+07	3.47871e+07	3.51181e+07	3.54979e+07	7.04465e+07	6.27193e+07	2.75507e+07	2.60503e+07	4.93145e+07	50599941	42099451	3.78945e+07	56631289	61032073	36503452	3.5835e+07	2.57617e+07	2.24711e+07	49743074	42026945	5.53366e+07	4.93834e+07	3.72448e+07	3.29133e+07	40999473	34630096	3.14035e+07	31164496	62572398	50912723	3.94528e+07	3.2581e+07	2.96952e+07	2.00383e+07	38375204	2.85051e+07	2.75725e+07	2.24965e+07	2.76497e+07	22066550
AT1G20260.1	1.17992e+09	5.56115e+08	7.55404e+08	4.79909e+08	8.5531e+08	7.40083e+08	6.10418e+08	6.08211e+08	6.50865e+08	5.50319e+08	5.8457e+08	6.33232e+08	9.4747e+08	8.21553e+08	6.35483e+08	6.13626e+08	6.96725e+08	6.57511e+08	7.28774e+08	6.64819e+08	7.72484e+08	7.56462e+08	8.73326e+08	6.12516e+08	6.74202e+08	6.15919e+08	5.89602e+08	6.48192e+08	7.71815e+08	6.59017e+08	7.00919e+08	6.03446e+08	7.43245e+08	6.37486e+08	6.96063e+08	5.62055e+08	8.31067e+08	7.02706e+08	6.43899e+08	6.4685e+08	6.86095e+08	5.62122e+08	7.56124e+08	5.9029e+08	7.11762e+08	6.20315e+08	9.16166e+08	6.5442e+08
AT1G20330.1	1.42306e+08	8.61535e+07	1.6111e+08	7.83355e+07	8.51912e+07	7.04683e+07	8.18167e+07	8.10844e+07	9.22766e+07	7.78284e+07	6.66326e+07	7.12761e+07	1.15166e+08	1.05419e+08	7.81872e+07	8.72473e+07	6.83954e+07	7.43772e+07	8.88126e+07	8.95739e+07	8.02717e+07	7.37792e+07	9.57236e+07	8.9692e+07	1.04862e+08	9.93815e+07	4.6869e+07	8.17411e+07	1.18007e+08	9.0423e+07	9.80932e+07	4.75036e+07	6.80877e+07	6.2261e+07	6.13932e+07	5.61235e+07	7.8506e+07	6.8049e+07	4.77536e+07	4.54052e+07	54437295	3.95426e+07	7.86529e+07	6.43282e+07	5.30227e+07	6.03753e+07	9.49385e+07	8.91586e+07
AT1G20340.1	3.40417e+07	1.16747e+07	7.12292e+06	9.22469e+06	1.91155e+07	15692226	2.73962e+07	3.20323e+07	3.48879e+07	19713086	18819052	20473916	41852270	2.85965e+07	21330452	18215358	2.01513e+07	27428775	11716472	9340739	15666921	13423885	10434852	8703778	9146986	6142099	16654558	12380709	3.32295e+07	2.73611e+07	9247564	8559865	15654287	13684429	28044252	2.36116e+07	16360791	23365173	2.01942e+07	11763481	14204704	8945943	10867833	7747809	15693894	11301969	23623864	12576641
AT1G20440.1	7.53865e+08	1.14598e+08	5.09022e+08	1.37431e+08	2.78937e+08	2.64151e+08	2.09804e+08	1.74897e+08	1.97541e+08	1.91093e+08	2.89988e+08	2.45787e+08	1.46333e+08	1.24411e+08	1.88727e+08	1.24343e+08	2.29448e+08	1.70464e+08	2.36952e+08	1.64619e+08	2.96691e+08	2.48806e+08	3.17645e+08	2.5147e+08	1.43845e+08	1.20875e+08	2.27433e+08	1.29633e+08	1.97295e+08	1.02788e+08	3.10949e+08	2.72969e+08	3.21599e+08	3.13111e+08	4.15931e+08	3.65496e+08	4.46675e+08	2.36261e+08	2.47408e+08	1.80269e+08	2.14274e+08	1.43122e+08	2.78102e+08	2.61788e+08	2.87601e+08	1.91823e+08	4.79063e+08	2.18885e+08
AT1G20450.1	1.94583e+08	8.97311e+07	1.54871e+08	9.32363e+07	1.25665e+07	8.23982e+06	1.07203e+08	8.12456e+07	1.14653e+08	4.25612e+07	2.20105e+07	1.78871e+07	8.56301e+07	2.34702e+07	4.07369e+07	3.88e+07	1.3729e+07	2.90704e+07	1.27804e+08	5.84845e+07	1.23186e+07	1.23033e+07	7.16324e+07	2.46234e+07	3.01922e+08	2.28088e+08	2.73825e+07	8.90735e+07	3.07494e+08	2.56178e+08	2.84067e+07	1.82674e+07	2.65976e+07	3.15435e+07	1.0947e+07	1.00838e+07	2.32232e+07	1.70669e+07	2.16645e+07	1.71721e+07	8.96553e+06	4.2046e+06	2.09989e+07	1.75638e+07	1.16496e+07	1.30237e+07	2.01502e+08	7.59248e+07
AT1G20580.1	6.21537e+07	3.56374e+07	8.28958e+07	70749094	110736183	84865220	40209864	36000419	5.31651e+07	1.00248e+08	3.90552e+07	1.19526e+08	1.02539e+08	100546050	1.17011e+08	97259313	8.08622e+07	3.53366e+07	51514795	4.78235e+07	8.13455e+07	8.24322e+07	139108340	4.48745e+07	8.93522e+07	5.79962e+07	7.81557e+07	7.00784e+07	88291171	5446.95	72567821	6.22312e+07	6.86469e+07	8.07909e+07	6.19515e+07	6.66355e+07	1.23869e+08	106486931	7.43486e+07	8.0504e+07	7.82504e+07	87277883	106096712	7.76284e+07	6.65739e+07	7.07325e+07	98976387	6.61032e+07
AT1G20620.6	1.5532e+09	6.54562e+08	8.88322e+08	5.58821e+08	1039125398	1.01359e+09	1.37137e+09	1.59024e+09	1.68889e+09	1.37707e+09	1.32489e+09	1.55142e+09	1.4376e+09	1.19552e+09	6.78299e+08	7.80064e+08	7.05499e+08	8.24553e+08	1.6131e+09	1.45661e+09	1.58941e+09	1.5269e+09	1.86708e+09	1.51256e+09	5.62734e+08	5.266e+08	6.17553e+08	7.05666e+08	1.08985e+09	8.81812e+08	1.57694e+09	1.25518e+09	1.87803e+09	1652006681	1.70051e+09	1.47056e+09	7.97407e+08	6.73477e+08	6.21646e+08	6.02059e+08	6.14532e+08	4.79833e+08	1.57067e+09	1.10936e+09	1.37041e+09	1.12204e+09	2.30819e+09	1.48366e+09
AT1G20630.1	1.03691e+08	4.51654e+07	5.91902e+07	3.30876e+07	8.78932e+07	7.56807e+07	1.07751e+08	106343331	1.1016e+08	1.08484e+08	1.03155e+08	1.23994e+08	9.93603e+07	8.68455e+07	6.65856e+07	6.262e+07	5.99256e+07	5.65709e+07	134102902	120734796	1.59685e+08	1.53354e+08	1.3411e+08	1.1097e+08	75561275	8.79064e+07	7.28717e+07	81111973	1.08972e+08	78171152	1.44805e+08	1.21449e+08	1.68626e+08	1.63707e+08	1.14999e+08	1.06421e+08	100647389	7.98241e+07	7.15127e+07	8.43561e+07	7.36643e+07	8.09459e+07	178648844	1.38497e+08	1.7589e+08	1.63427e+08	1.81018e+08	119810891
AT1G20693.1	2.22806e+08	1.16745e+08	2.05332e+08	8.60239e+07	4.75344e+07	7.11437e+06	6.67062e+07	7.13963e+07	1.05949e+08	1.02807e+08	6.55153e+07	8.0705e+07	1.48216e+08	2.02809e+08	9.74639e+07	1.43839e+08	6.31288e+07	7.54277e+07	9.70611e+07	1.24555e+08	6.62823e+07	4.17651e+06	1.16103e+08	1.35472e+08	1.72136e+08	1.35251e+08	6.89773e+06	1.31988e+08	1.9643e+08	1.15248e+08	2.30521e+08	9.51777e+06	9.06448e+06	4.75629e+06	5.09258e+06	3203098	1.40418e+07	8.35842e+06	4.95916e+06	3.12911e+06	9.72867e+07	1.12846e+08	6.22186e+06	3.2477e+06	3.94011e+06	6.3836e+07	1.1375e+08	1.10384e+08
AT1G20696.2	118811	70314.5	30505.3	514582	432041	349329	52709.5	51120.4		45127.1	943817	52441.1	187172	145672	1.08813e+06	1.49324e+06		43325.1	104187	62146.1	164331	109247	669619	701418	118573	102345	219896	178843	81505.2	99872.7	322982	234300	437463	438658	254303	244833	724456	538137	370072	212860	191829	71359.8	290299	136377	215850	66342	154024	104237
AT1G20950.1	1.0152e+09	4.39081e+08	6.4181e+08	3.96917e+08	7.83592e+08	8.01977e+08	5.28534e+08	5.80762e+08	6.41291e+08	5.47889e+08	6.23638e+08	6.58222e+08	8.56158e+08	7.7048e+08	6.46745e+08	5.69037e+08	5.83879e+08	5.68566e+08	7.81471e+08	6.78183e+08	7.84893e+08	9.15249e+08	7.65192e+08	6.27164e+08	6.11399e+08	5.53189e+08	7.32103e+08	6.2816e+08	7.68962e+08	6.103e+08	7.8489e+08	7.19867e+08	9.60005e+08	9.05155e+08	9.29485e+08	8.02712e+08	8.20318e+08	9.64017e+08	8.04277e+08	6.91974e+08	7.13771e+08	5.07798e+08	1.15163e+09	8.7276e+08	8.72082e+08	6.87548e+08	1.04475e+09	6.59832e+08
AT1G20960.2	410238311	1.3727e+08	2.21763e+08	1.14132e+08	2.36458e+08	2.11225e+08	1.28057e+08	1.23617e+08	9.45118e+07	1.11016e+08	1.47267e+08	1.29993e+08	2.45248e+08	2.06041e+08	1.42278e+08	1.77689e+08	1.5748e+08	1.54467e+08	1.43802e+08	1.38877e+08	1.57683e+08	1.61643e+08	1.58978e+08	1.68888e+08	1.5793e+08	1.48087e+08	1.58874e+08	1.52161e+08	2.21793e+08	1.78396e+08	1.6195e+08	1.86812e+08	1.74918e+08	1.59274e+08	2.0335e+08	1.84582e+08	2.5396e+08	2.57186e+08	1.81215e+08	1.98298e+08	1.43122e+08	1.11731e+08	2.37656e+08	1.81692e+08	144440607	1.29709e+08	2.08123e+08	1.70197e+08
AT1G20970.1	2.67496e+07	1.11123e+07	2.01982e+07	11523343	1.83834e+07	2.42021e+07	1.54702e+07	2.06987e+07	2.19387e+07	2.5824e+07	1.93279e+07	2.9818e+07	4.09788e+07	4.29389e+07	2.59683e+07	2.35526e+07	1.7857e+07	2.05933e+07	2.64251e+07	2.71372e+07	2.09802e+07	1.86652e+07	3.64854e+07	3.50762e+07	1.90482e+07	2.04509e+07	2.12503e+07	3.5963e+07	8.71537e+07	3.87251e+07	5.14277e+07	2.33418e+07	3.54649e+07	2.96308e+07	2.85652e+07	2.03816e+07	3.55115e+07	2.83176e+07	2.50665e+07	2.17909e+07	1.64837e+07	1.57032e+07	3.88502e+07	2.63868e+07	2.7994e+07	1.80254e+07	2.98946e+07	1.75872e+07
AT1G21065.1	4.43459e+07	1.77188e+07	4.67015e+07	2.25818e+07	4.48612e+07	4.4511e+07	2.10151e+07	2.15638e+07	3.06832e+07	2.20425e+07	2.01239e+07	2.58823e+07	5.14137e+07	47497004	2.13827e+07	1.8824e+07	16636041	7.19131e+06	3.09461e+07	2.35099e+07	3.36582e+07	3.95702e+07	3.62701e+07	2.24484e+07	1.99816e+07	2.626e+07	3.12286e+07	17086852	60756617	4.27647e+07	3.51236e+07	1.96172e+07	3.13201e+07	3.58026e+07	2.58295e+07	2.2326e+07	2.24074e+07	2.91572e+07	2.45669e+07	2.78931e+07	2.33305e+07	1.95799e+07	3.62328e+07	2.48486e+07	2.54247e+07	1.92507e+07	4.06907e+07	1.99526e+07
AT1G21130.1	3.45027e+07	1.99716e+07	2.35128e+07	1.68944e+07	3.60425e+07	3.35623e+07	3.52075e+07	3.71887e+07	3.23731e+07	2.93876e+07	3.69599e+07	4.42374e+07	3.68656e+07	3.18696e+07	35199956	2.98836e+07	2.49406e+07	2.44758e+07	3.64396e+07	3.38869e+07	5.08124e+07	4.89598e+07	4.2095e+07	33825962	1.46789e+07	1.32793e+07	1.62554e+07	1.28681e+07	2.04173e+07	1.24876e+07	2.25412e+07	2.02851e+07	2.36882e+07	2.90293e+07	2.90578e+07	2.56281e+07	2.62827e+07	1.91381e+07	2.18195e+07	1.99545e+07	1.55628e+07	1.43968e+07	2.95669e+07	2.94884e+07	2.99595e+07	2.48346e+07	3.46759e+07	2.04451e+07
AT1G21380.1	410625		126840		495767	628836	368887	277797	355440	212574	407976	468429	400803	667971	307826		387372	296423	551960	205105	829183	822149		327751	233023	119224	351101	308921	699561				530324	303539	532868	411185	486328				222966		289297		344179	395854	837135	373940
AT1G21440.2	3.09907e+08	1.74062e+08	2.53876e+08	1.56433e+08	9.02891e+07	83682430	1.30339e+08	1.52898e+08	1.70335e+08	1.7461e+08	1.11499e+08	1.44383e+08	2.69049e+08	2.73325e+08	1.37219e+08	2.14357e+08	1.27482e+08	1.7317e+08	1.31918e+08	1.90164e+08	1.00342e+08	7.08682e+07	1.92392e+08	1.81108e+08	2.34515e+08	2.0612e+08	1.21911e+08	2.31856e+08	3.05788e+08	2.09744e+08	2.13737e+08	1.279e+08	1.24813e+08	9.48887e+07	8.70371e+07	2.66826e+07	1.09078e+08	1.37824e+08	97423999	1.1053e+08	9.08026e+07	1.24017e+08	1.19771e+08	8.27785e+07	8.97451e+07	1.05122e+08	1.62174e+08	1.04654e+08
AT1G21600.2	5.70394e+07	1.69147e+07	2.82573e+07	1.97841e+07	4.68342e+07	3.74575e+07	2.40518e+07	2.25149e+07	2.23062e+07	2.29639e+07	2.3166e+07	1.9643e+07	5.93296e+07	5.72593e+07	2.68589e+07	2.32012e+07	4.58864e+07	2.23924e+07	2.34408e+07	1.96168e+07	4.46117e+07	40142931	2.42266e+07	2.04569e+07	617428	603898	40598239	931594	5.10927e+06	4.32989e+06	925491	842814	3.86222e+07	4.11113e+07	2.9728e+07	2.91339e+07	5.11994e+07	45844731	3.80166e+07	838844	3.4708e+07	440568	4.65822e+07	4.47465e+07	1.10806e+06	2.34025e+07	4.39901e+06	2.80224e+06
AT1G21630.2	37326697	1.06702e+07	2.64065e+07	9.76723e+06	1.72929e+07	13493510	9.50667e+06	1.49332e+07	1.89891e+07	2.01142e+07	1.59225e+07	1.63314e+07	3.05527e+07	2.62481e+07	19221348	23345656	1.82087e+07	1.95855e+07	1.03817e+07	1.6383e+07	1.47832e+07	12406204	22128903	1.88798e+07	12652479	8.86755e+06	20676149	1.62061e+07	5.59568e+06	1.01446e+07	2.41145e+07	2.05578e+07	2.43436e+07	2.1302e+07	2.41669e+07	2.07668e+07	6.53948e+06	1.00206e+07	2.28062e+07	2.47411e+07	1.84757e+07	2.2788e+07	28464183	20696813	2.67428e+07	1.85216e+07	1.77218e+07	1.41328e+07
AT1G21680.1	2.40786e+07	3.53961e+06	1.22979e+07	5.34274e+06	1.79542e+07	1.94243e+07	6.24399e+06	6.52986e+06	8.94615e+06	7.57596e+06	8.14318e+06	1.05452e+07	1.72575e+07	1.31227e+07	8.34e+06	7.61754e+06	1.30271e+07	1.28028e+07	1.28127e+07	5.73644e+06	1.50118e+07	8.81631e+06	1.03095e+07	9.95153e+06	12788832	1.09795e+07	2.44247e+07	1.49367e+07	2.00178e+07	1.33859e+07	1.55924e+07	1.49377e+07	2.39116e+07	1.91683e+07	1.39747e+07	1.25014e+07	1459643	3.19194e+07	2.23097e+07	2.14239e+07	1.33534e+07	6.58663e+06	20824603	1.32398e+07	11984810	9948016	1.35875e+07	6.88759e+06
AT1G21690.3	130341	108573	128817	1.45237e+06	2.69083e+06	2.77573e+06	253121	169819	128768	3248.56	920999	4746507	1.86753e+06	529210	2.91436e+06	3232075	19117.8	4552.78	3.33535e+06	183953	389089	301512	3.71716e+06		247333	174042	2.13172e+07	1.54438e+06	3.02681e+06	3.98718e+06	1.98463e+06	1.67936e+06	4.76547e+06	1.1457e+07	3.79533e+06	3.83657e+06	3.36722e+06	1.55907e+07	2.89601e+06	1.38862e+07	348708	181838	4.03899e+06	1.83448e+07	1.42931e+07	1.32399e+06	3.71258e+06	244273
AT1G21720.1	3.90581e+07	2.21257e+07	6.61894e+07	4.14556e+07	9.82069e+06	1.06222e+07	1.09525e+07	12082748	1.05451e+07	8.62305e+06	9.89532e+06	8.79599e+06	2.07534e+07	1.37101e+07	1.23447e+07	1.37938e+07	4.96863e+06	9.38393e+06	1.72305e+07	1.36793e+07	1.26703e+07	1.13873e+07	1.19098e+07	6.25185e+06	1.66908e+07	1.43534e+07	7.0972e+06	1.86915e+07	2.25908e+07	2.3119e+07	1.30855e+07	1.09098e+07	1.53085e+07	1.3589e+07	1.3812e+07	1.30631e+07	1.56637e+07	1.29462e+07	1.17906e+07	9.84591e+06	6.73445e+06	5.84485e+06	1.84389e+07	1.28071e+07	1.20879e+07	9.83794e+06	1.67894e+07	1.65032e+07
AT1G21750.1	1.56581e+09	5.65883e+08	1.04933e+09	5.58056e+08	1.0566e+09	9.65569e+08	9.60274e+08	1.00941e+09	1.16113e+09	9.92053e+08	1.05809e+09	1.17429e+09	1.1272e+09	1.0231e+09	7.88618e+08	7.43835e+08	7.50255e+08	7.57777e+08	1.33506e+09	1.17543e+09	1.6137e+09	1.50993e+09	1.49681e+09	1.22709e+09	6.46545e+08	5.59975e+08	7.47569e+08	7.00246e+08	1.08882e+09	7.93658e+08	1.17393e+09	1.02778e+09	1.47317e+09	1.30198e+09	1.35456e+09	1.18729e+09	1.04156e+09	9.46772e+08	8.01108e+08	7.20987e+08	7.77305e+08	5.64877e+08	1.5244e+09	1.21179e+09	1.31236e+09	1.10276e+09	1.58166e+09	1.08539e+09
AT1G21850.1	25875027	1.24246e+07	9.84516e+06	9.20916e+06	28063744	30607592	3.03385e+07	4.16992e+07	2.96914e+07	2.67242e+07	2.37336e+07	3.04385e+07	66699421	4.4444e+07	1.66696e+07	2.34342e+07	2.70324e+07	2.75878e+07	4.80834e+07	4.64635e+07	52055960	54582728	2.88473e+07	2.50932e+07	18502064	1.40673e+07	25669772	3.0276e+07	55852254	49547063	1.75413e+07	14785417	32979688	29106704	34268960	26652088	37425184	31276344	19226666	17896824	12216281	7413675	38322056	28967562	25206796	18842226	2.61649e+07	2.21524e+07
AT1G22270.1	2.65814e+07	9.84048e+06	1.78302e+07	1.05659e+07	1.92108e+07	19695515	1.63357e+07	1.6352e+07	1.5578e+07	1.63749e+07	1.77175e+07	1.78771e+07	23821336	1.76995e+07	1.28844e+07	13825556	1.50479e+07	4.51099e+06	20389369	1.74693e+07	2.23142e+07	1.86136e+07	1.73015e+07	16398681	1.3063e+07	1.39033e+07	13714874	1.08329e+07	2.13689e+07	13979817	15987034	15695885	17948808	1.86309e+07	23330634	16379697	26837808	1.68782e+07	1.43665e+07	15976982	11929545	6.25786e+06	24396166	19854532	1.9737e+07	1.75731e+07	2.66727e+07	1.83099e+07
AT1G22300.1	2.64097e+09	7.6973e+08	1523709155	7.09983e+08	9.64391e+08	7.28589e+08	9.54257e+08	1.06324e+09	1.17329e+09	1.11601e+09	9.81989e+08	1.19794e+09	1.35856e+09	1.25747e+09	1.01357e+09	1.05661e+09	9.80058e+08	1.04326e+09	1.22681e+09	1.21026e+09	1.21866e+09	1.02392e+09	1.52995e+09	1.27729e+09	9.69509e+08	8.14757e+08	7.79213e+08	9.99117e+08	1.2849e+09	8.68825e+08	1.43118e+09	1.19274e+09	1.15422e+09	7.82805e+08	1.18494e+09	7.7803e+08	1.22657e+09	7.94309e+08	8.77861e+08	1.02439e+09	1.04549e+09	1.06999e+09	9.88477e+08	7.67055e+08	1.30557e+09	1.3192e+09	1.65058e+09	1.13739e+09
AT1G22330.1	10974914	2.48594e+06	1.08295e+07	6.72328e+06	16557328	1.38646e+07	4.60421e+06	3717021	1.12636e+07	1.24914e+07	7036886	6678386	16677606	13996387	12023548	8.98741e+06	1.52434e+07	1.15088e+07	4.69627e+06	1.09964e+07	1.92563e+07	19190731	7902119	11648731	889409	1.27423e+06	4285236	2446876	3.60409e+06		3.57907e+06	3.05759e+06	4.16519e+06	3.38357e+06	1.03568e+07	2.95218e+06	11033902	2.51621e+06	2.64482e+06	2636090	3724503	2292991	3924307	2.72205e+06	5.124e+06	4.56295e+06	6.92904e+06	2302591
AT1G22340.1	21854124	12739895	4072174	7463170	31956726	31777270	15802417	17544610	18991112	12038877	12187275	15000723	35698768	28954474	14852775	16969238	16576015	16825226	21250598	12651357	23463758	22115670	17094182	15265043	19857098	16082634	25697782	22297874	33375762	31413108	23395722	21227520	33639972	31834298	31153502	27092416	45193044	40207008	28219390	24793980	21869150	12067838	46308708	33492300	24228034	17739824	28542708	17105794
AT1G22360.1	1.76505e+07	9.50153e+06	6.96692e+06	8.70814e+06	3.23545e+07	3.36238e+07	1.72112e+07	2.169e+07	2.08545e+07	1.8059e+07	2.27884e+07	2.59292e+07	3.73736e+07	3.31048e+07	1.86669e+07	2.02125e+07	2.01785e+07	2.12019e+07	2.83173e+07	2.79094e+07	4.21109e+07	4.8035e+07	3.1901e+07	2.66446e+07	1.89532e+07	1.62456e+07	2.64127e+07	2.36666e+07	1.67193e+07	2.08586e+07	2.30868e+07	2.85883e+07	4.44738e+07	3.87785e+07	2.81253e+07	2.54831e+07	3.14691e+07	3.06739e+07	2.86121e+07	2.28002e+07	1.67995e+07	7.78665e+06	5.16066e+07	3.63255e+07	3.77634e+07	2.703e+07	3.38544e+07	2.38994e+07
AT1G22400.1	2.37538e+07	1.72496e+07	1.446e+07	9.67803e+06	2.61928e+06	3.44601e+06	1.78591e+07	1.92894e+07	2.18487e+07	1.79066e+07	9104552	1.65695e+07	1.56713e+07	12960101	1.49725e+07	1.82886e+07	5.83831e+06	1.05696e+07	1.85424e+07	2.44422e+07	5.35403e+06	6.37184e+06	2.45405e+07	1.88641e+07	2.01836e+07	1.9927e+07	3.13738e+06	2.38706e+07	3.03535e+07	2.60887e+07	1.51582e+07	2.74865e+06	8.77297e+06	3.66553e+06	5.98943e+06	3.04305e+06	5.1894e+06	4.08374e+06	3.61815e+06	3.00907e+06	7.69213e+06	1.7964e+06	5.14876e+06	3.46022e+06	7.95255e+06	7846894	3.94795e+07	3.40302e+07
AT1G22410.1	5.34442e+07	3.29646e+07	4.59213e+07	3.85984e+07	2.6515e+07	6.20813e+07	4.13413e+07	5.50495e+07	4.92199e+07	4.41607e+07	5.23812e+07	6.56346e+07	7.64948e+07	2.2718e+07	6.62536e+07	6.66113e+07	3.48971e+07	3.86759e+07	5.97532e+07	5.32197e+07	5.63925e+07	2.01653e+07	6.89552e+07	5.19003e+07	5.60798e+07	6.32391e+07	2.80224e+07	7.18467e+07	7.11719e+07	5.36877e+07	2.54534e+07	5.45126e+07	3.41307e+07	3.37904e+07	7.13304e+07	6.52026e+07	9.92843e+07	8.15208e+07	6.69842e+07	6.88987e+07	5.47839e+07	3.90886e+07	5.12818e+07	2.70198e+07	6.57355e+07	2.83812e+07	7.95669e+07	6.52301e+07
AT1G22430.2	1.82286e+07	1.06865e+07	1.55354e+07	1.31627e+07	5.31407e+07	5.62223e+07	3.0158e+07	3.46166e+07	3.51774e+07	3.36381e+07	3.30473e+07	4.05692e+07	4.87e+07	4.61198e+07	34658053	3.08888e+07	2.71895e+07	2.10053e+07	4.18756e+07	4.01719e+07	5.62533e+07	6.11568e+07	3.36118e+07	2.68891e+07	2.34646e+07	2.34066e+07	4.52861e+07	4.12845e+07	4.27389e+07	4.23822e+07	4.8019e+07	4.06118e+07	6.30288e+07	6.23938e+07	4.20018e+07	4.21935e+07	6.02955e+07	6.17599e+07	3.7918e+07	3.83509e+07	3.573e+07	2.38818e+07	6.7712e+07	5.30058e+07	4.77766e+07	4.35995e+07	6.17955e+07	3.49463e+07
AT1G22440.1	1.37789e+07	7.43379e+06	5.10177e+06	5.96322e+06	2.08471e+07	2.25066e+07	1.00587e+07	1.19035e+07	1.28439e+07	1.09618e+07	1.2907e+07	1.33488e+07	2.55619e+07	2.20952e+07	9.04282e+06	1.08755e+07	9.58724e+06	9.65569e+06	1.61139e+07	1.65106e+07	2.86149e+07	2.33876e+07	1.24352e+07	1.10427e+07	1.18898e+07	1.07179e+07	1.90861e+07	16195001	1.94653e+07	2.06322e+07	1.95716e+07	1.70084e+07	2.91345e+07	2.73763e+07	2.91457e+07	2.38531e+07	2.75514e+07	2.65209e+07	9.41479e+06	1.38169e+07	1.25463e+07	7.86536e+06	3.16055e+07	2.24828e+07	1.64516e+07	1.40114e+07	1.8829e+07	1.40612e+07
AT1G22450.1	34397829	5.54068e+06	1.5461e+07	3.97524e+06	1.45938e+07	1.48946e+07	1.24049e+07	8.61265e+06	1.10603e+07	9.75724e+06	1.17351e+07	1.0987e+07	16592917	14423293	7.1897e+06	6.42773e+06	8663417	1.00111e+07	12129846	1.23721e+07	1.79471e+07	15383416	1.31478e+07	1.014e+07	1.19797e+07	9.3066e+06	9.22201e+06	8.98705e+06	2.23874e+07	1.57246e+07	7.22858e+06	7.07628e+06	1.60023e+07	1.38775e+07	6.92365e+06	7619635	1.6932e+07	1.14442e+07	8567329	7.53848e+06	5.32882e+06	3330736	1.47596e+07	9676094	1.12097e+07	9253964	1.47487e+07	5.75252e+06
AT1G22530.1	57430091	1.70364e+07	3.22415e+07	2.11344e+07	28822583	3.60189e+07	1.74144e+07	1.77087e+07	2.35723e+07	2.48396e+07	16049891	16373230	4.03125e+07	3.58353e+07	2.56325e+07	2.20179e+07	2.40504e+07	2.5106e+07	1.7802e+07	1.63349e+07	2.07715e+07	2.21586e+07	1.95657e+07	1.71915e+07	3.2753e+07	3.16912e+07	3.19309e+07	2.68541e+07	6.01466e+07	3.17425e+07	19981030	1.48276e+07	2.16448e+07	2.07245e+07	1.9517e+07	1.85322e+07	3.7669e+07	2.93591e+07	3.1517e+07	2.3974e+07	2.87197e+07	1.79111e+07	21845892	1.9545e+07	3.28367e+07	2.17187e+07	3.35368e+07	1.52019e+07
AT1G22610.1	142764944	69107536	3.75526e+07	27852090	152216816	1.62461e+08	123450064	139074048	105062304	9.77896e+07	82777528	100023744	229440912	184526272	74762136	106104888	140462016	1.45332e+08	1.90022e+08	170040928	173802464	1.78952e+08	95480328	85245408	62557448	55430664	126186288	110147320	1.42931e+08	1.62827e+08	84479968	81120368	102571224	97876032	1.06339e+08	9.43268e+07	162980777	132697328	87974888	7.8423e+07	69079256	40283876	110316664	8.09188e+07	71810544	51727972	6.98467e+07	5.93056e+07
AT1G22710.1	3.0041e+06	854209	1.30286e+06	471636	520293	566992	839784	468343	908914	288099	267223	248422	437073	414819	337309	343677	309870	333096	488765	272044	407439	369155	308406	302885	2.79275e+06	3.20008e+06	502152	453372	4.73382e+06	2.27235e+06	456591	466770	589691	579482	444791	488561	637201	637910	539369	499695	542803	392398	597287	482757	464120	372927	1.81766e+06	796962
AT1G22840.1	4.63117e+08	3.4632e+08	1.91912e+08	2.35636e+08	5.42553e+08	527906896	4.18078e+08	451545472	5.10657e+08	4.01001e+08	2.99865e+08	4.23234e+08	803972945	7.04687e+08	3.24654e+08	3.92983e+08	3.46377e+08	4.30257e+08	5.21552e+08	4.63697e+08	596964304	5.97388e+08	4.58483e+08	3.66026e+08	581481666	512805274	6.93242e+08	655044686	747002494	736166335	6.76034e+08	611182312	8.54096e+08	789894272	6.38541e+08	6.31921e+08	848097390	9.36659e+08	638139984	643566912	5.19702e+08	4.11214e+08	1.02417e+09	7.56542e+08	7.2822e+08	600540050	8.15851e+08	5.30315e+08
AT1G22920.1	1.01851e+08	6.15023e+07	4.97192e+07	4.4565e+07	1.01388e+08	1.0567e+08	8.88384e+07	87966127	8.33892e+07	7.2935e+07	9.89949e+06	7.46578e+07	1.86822e+08	1.62423e+08	6.10772e+07	1.15821e+07	9.14333e+07	8.81762e+07	1.08126e+08	9.63219e+07	1.46921e+08	1.48945e+08	1.48926e+07	8.0152e+07	1.30506e+08	1.12488e+08	1.62155e+08	1.33163e+08	1.62886e+08	1.53891e+08	1.57656e+08	1.47634e+08	2.26369e+08	1.99852e+08	137905211	1.26593e+08	2.23451e+08	2.00329e+08	1.68336e+08	1.55297e+08	1.08222e+08	7.84368e+07	2.35701e+08	2.02081e+08	1.97003e+08	1.34753e+08	9.61515e+07	7.81372e+07
AT1G23100.1	22637058	1.5545e+07	21916470	15103684	28584805	28112713	2.13182e+07	20573534	2.14577e+07	1.98928e+07	23079014	26507233	33370778	29934112	2.17174e+07	18005715	18094060	1.61994e+07	27881863	25188457	36380952	34458061	24787619	1.91398e+07	23182586	24237116	27953331	24056889	37191556	29229081	26622561	22744516	30377643	29974749	25892693	24135632	32523906	27468159	25224428	26766243	21838132	1.7308e+07	36007025	30423921	29923461	27133288	39943080	23428757
AT1G23130.1	2.18315e+07	1.28617e+07	8.38147e+06	1.17299e+07	3.29852e+07	3.48294e+07	1.5546e+07	1.72166e+07	2.29959e+07	1.29716e+07	1.37308e+07	1.69436e+07	4.86897e+07	3.57778e+07	6.00177e+06	2.13167e+07	1.79046e+07	1.88996e+07	2.1662e+07	1.81851e+07	2.31446e+07	2.23949e+07	1.20748e+07	9.16414e+06	3.82633e+07	3.24514e+07	4.21546e+07	3.90036e+07	4.84734e+07	4.67377e+07	3.7054e+07	3.27441e+07	3.94216e+07	3.95365e+07	3.72681e+07	3.33493e+07	6.43322e+07	5.94523e+07	3.53628e+07	3.26805e+07	2.81604e+07	1.54904e+07	4.85755e+07	3.56855e+07	2.72906e+07	2.14078e+07	3.88654e+07	2.42798e+07
AT1G23140.1	9.27726e+06	4705027	1.00495e+06	381070	7.53851e+06	4.13179e+06	6.37748e+06	7.22654e+06	6.89891e+06	7.03488e+06	6.78616e+06	7.89057e+06	8.09566e+06	8.20344e+06	2.21858e+06	2.48994e+06	6.95249e+06	7.30787e+06	8.37238e+06	1.0424e+07	1.30049e+07	1.26755e+07	4267200	7.08438e+06	3452487	4.03571e+06	5.11335e+06	4.45392e+06	7386764	6.36139e+06	4.67623e+06	4.52525e+06	8.97575e+06	6.69122e+06	7964759	6.46069e+06	8.73697e+06	6.87703e+06	5549997	3.47788e+06	2.89013e+06	2.14751e+06	1.01453e+07	5.86693e+06	5.65683e+06	3.97434e+06	5.57114e+06	2.20452e+06
AT1G23180.1	1.01405e+07	5210344	7.16759e+06	4.07212e+06	8.58764e+06	8.59944e+06	5.33384e+06	4.81216e+06	6.94236e+06	4.72541e+06	5.16486e+06	5.40426e+06	1.24696e+07	10940570	5.54064e+06	5.84737e+06	6.18836e+06	4.86057e+06	5.13902e+06	2.99378e+06	6.00842e+06	5.33521e+06	6.70103e+06	5.64483e+06	1.32587e+07	1.07081e+07	8.6504e+06	9.46494e+06	39217055	19930167	12023064	7.79551e+06	9.3142e+06	8.78743e+06	10600826	9.72156e+06	1.55431e+07	1.51065e+07	9.2097e+06	9.14747e+06	1.00739e+07	6.35591e+06	1.51727e+07	1.08112e+07	9.92367e+06	7.3293e+06	1.46916e+07	8.85101e+06
AT1G23190.1	1.53476e+09	6.01395e+08	8.9626e+08	5.23634e+08	1.11724e+09	1.12115e+09	9.449e+08	9.59506e+08	1.0097e+09	8.32622e+08	9.93854e+08	1.05262e+09	1.2156e+09	1.04018e+09	8.18629e+08	7.9918e+08	9.15219e+08	8.39008e+08	1.20136e+09	1.04973e+09	1.27712e+09	1.3197e+09	1.2251e+09	9.73809e+08	7.54092e+08	6.68812e+08	9.02511e+08	8.24659e+08	1.06384e+09	8.51709e+08	1.04023e+09	8.71062e+08	1.21061e+09	1.15872e+09	1.15063e+09	1.02192e+09	1.30724e+09	1.12156e+09	8.76546e+08	8.15111e+08	8.31852e+08	5.92364e+08	1.44919e+09	1.1478e+09	1.14064e+09	9.23305e+08	1.50029e+09	9.59908e+08
AT1G23280.1	6.91845e+06		1.30832e+07	3.92703e+06	6371450	5.77708e+06					7885055	7013218			11202063	5928865	9418356	5921772			8508846	7.64691e+06		7.17255e+06	3056688	1.62463e+06	4354405	3.10836e+06	6.15453e+06	2.88297e+06		4.79478e+06	7482281	5904864	6.64669e+06	5.05206e+06	25491252	9739446	5846905	5.50603e+06	5905505	4.76194e+06	10414120	8555323	10959125	6880615	1.02746e+07	4092245
AT1G23290.1	1.61599e+09	8.7077e+08	1.71743e+09	8.96783e+08	8.14773e+08	8.27305e+08	5.86723e+08	6.10974e+08	7.62039e+08	5.69823e+08	4.68302e+08	5.27383e+08	1.47055e+09	8.43915e+08	7.81841e+08	9.0004e+08	3.81663e+08	4.46453e+08	8.09577e+08	6.85397e+08	6.25939e+08	6.1845e+08	8.4738e+08	4.75324e+08	1.39966e+09	1.12316e+09	5.98388e+08	8.61275e+08	2.40963e+09	1.60366e+09	6.16505e+08	5.06335e+08	7.72469e+08	7.12182e+08	7.17164e+08	6.62748e+08	1.02031e+09	8.97028e+08	6.40198e+08	5.91048e+08	5.45494e+08	3.47363e+08	9.2576e+08	6.53036e+08	5.85181e+08	4.56857e+08	1.68749e+09	1.31899e+09
AT1G23310.1	6.35427e+09	2.55937e+09	4.04649e+09	2.47811e+09	3.21765e+09	2.93102e+09	2.6824e+09	2.73565e+09	3.18209e+09	2.96187e+09	2.27825e+09	2.72985e+09	4.47449e+09	4.15251e+09	2.82335e+09	3.09454e+09	2.37063e+09	2.43497e+09	3.40412e+09	3.46065e+09	3.31834e+09	2.91512e+09	3.55363e+09	3.05074e+09	3.8819e+09	3.45012e+09	2.90291e+09	3.9842e+09	5.00192e+09	3.66916e+09	4.73519e+09	2.82795e+09	3.53036e+09	3.31841e+09	2.65131e+09	2.5192e+09	4.24198e+09	3.58333e+09	2.58189e+09	2.59602e+09	2.91287e+09	2.28244e+09	3.61292e+09	2.77464e+09	3.06235e+09	2.9028e+09	4.86845e+09	3.45552e+09
AT1G23440.3	5.04789e+06	6.10417e+06	1.0281e+07	7.57502e+06	1.16645e+07	1.25952e+07	4.68871e+06	6.52267e+06	6.8947e+06	7.00287e+06	1.90375e+07	2.59388e+07	8.59565e+06	8.65065e+06	9.9616e+06	5287273	6.02363e+06	5.9054e+06	9.29381e+06	7.25717e+06	2.38874e+07	2.64342e+07	1.89989e+07	9.66083e+06	7.7705e+06	7.20727e+06	2.49709e+07	2.43655e+07	1.29699e+07	1.06829e+07	1.12147e+07	7.59134e+06	2.62364e+07	2.29573e+07	1.55326e+07	1.60787e+07	1.5424e+07	1.20985e+07	8.63831e+06	9.46519e+06	1.37608e+07	8.00522e+06	1.51486e+07	1.41912e+07	28751387	2.20847e+07	1.74607e+07	9.99189e+06
AT1G23740.1	8.25388e+08	3.66984e+08	6.38464e+08	3.85178e+08	8.15259e+08	8.02105e+08	4.54374e+08	4.44522e+08	4.88912e+08	4.37276e+08	4.53362e+08	4.92868e+08	7.70798e+08	6.82931e+08	5.70031e+08	4.98603e+08	5.15257e+08	4.59433e+08	5.41918e+08	4.8609e+08	6.54415e+08	6.38756e+08	5.02658e+08	3.93413e+08	6.68971e+08	6.04163e+08	8.37463e+08	6.89056e+08	8.60476e+08	6.67585e+08	8.13374e+08	6.68788e+08	7.34194e+08	7.16806e+08	5.76103e+08	5.52782e+08	1.30004e+09	1.04705e+09	7.39797e+08	6.94901e+08	6.92874e+08	5.12514e+08	8.05167e+08	6.59463e+08	6.84694e+08	5.73093e+08	8.3231e+08	4.57291e+08
AT1G23750.1	5.26009e+06	288011	5794384	1.97382e+06			669784		465260							63483.8		33946.4	18483.9	9695.15	4726.71				2.78384e+06	3.61475e+06				63805.2								3736.11	21081.3					6851.79			563124	224811
AT1G23800.1	3.53823e+06	295175	2.74616e+06	1.34061e+06	1733670	1.2931e+06	521274	249640	943328	570196	927804	935899	1.33603e+06	1.14813e+06	1.20474e+06	534961	2.58396e+06	827011	1.25514e+06	512642	2.03668e+06	1.001e+06	1.56003e+06	1.63953e+06	1.13702e+06	1.11622e+06	495844	410241	5.10428e+06	983926	2.9506e+06	1.34422e+06	636805	989896	2.32299e+06	1.04265e+06	2.24786e+06	2.68559e+06	1.36239e+06	442601	2.25961e+06	811549	919446	590973	1.34042e+06	929564	2.0017e+06	226363
AT1G23820.1	1.65504e+08	9.33673e+07	1.1548e+08	8.80177e+07	2.30682e+08	2.15702e+08	1.12873e+08	1.15938e+08	1.31282e+08	1.17349e+08	1.23657e+08	1.47716e+08	2.02846e+08	1.90623e+08	1.44304e+08	1.3206e+08	1.09785e+08	1.09216e+08	1.59288e+08	1.46478e+08	2.36854e+08	2.34335e+08	1.70973e+08	1.37656e+08	1.4173e+08	1.28787e+08	1.79636e+08	1.6104e+08	1.86323e+08	1.60645e+08	1.96138e+08	1.84362e+08	2.30425e+08	2.29094e+08	2.08745e+08	1.9673e+08	2.97108e+08	2.51825e+08	1.93577e+08	1.82167e+08	1.65281e+08	1.13857e+08	2.86068e+08	2.06381e+08	2.13e+08	1.68951e+08	2.82289e+08	1.89145e+08
AT1G23870.1	32316.5	1.56172e+06	6.03531e+06	1.38528e+06		1.84784e+06	2.90667e+06	1.91319e+06	2.91743e+06	2.01159e+06	4845824	4.91069e+06	2.14765e+06	1.46468e+06	4.07672e+06	4.31348e+06	2.29537e+06	1.23154e+06	1.66337e+06	2.4512e+06	1.86574e+06	2.57125e+06	2932282	135195	1.43543e+06	6.22764e+06	250652	972492	109679	222569	462571	8.908e+06	9530862	400752	1.74521e+06	1.80143e+06	674743	262020	2.31789e+06	197517	8.53477e+06	6.82027e+06		2.13552e+06	262820	2.52645e+06	4.03284e+06	254277
AT1G23900.2	2.36116e+07	1.13453e+07	6232287	1.09515e+07	4.15594e+07	43493754	2.95861e+07	36917363	37417881	2.13112e+07	24580946	3.04959e+07	49992641	35101240	1.64784e+07	23872796	1.98449e+07	2.07652e+07	45404368	38750084	46581423	4.88853e+07	36422840	2.96596e+07	23696622	1.94728e+07	3.10949e+07	2.97543e+07	3.20007e+07	3.71014e+07	5.05375e+07	4.19125e+07	6.80723e+07	63502596	6.79474e+07	5.98969e+07	6.16168e+07	5.13683e+07	34809703	30041482	1.98577e+07	1.08377e+07	93959446	6.07521e+07	4.97802e+07	35932360	5.77629e+07	3.29691e+07
AT1G24020.2	1.81487e+09	1.22179e+09	1.55394e+09	1.09947e+09	6.366e+08	4.8965e+08	1.09252e+09	1.21111e+09	1.2102e+09	1.24174e+09	7.36518e+08	1.04929e+09	1.73296e+09	1.65977e+09	8.96972e+08	1.30295e+09	6.61022e+08	9.16938e+08	1.12161e+09	1.38122e+09	7.23666e+08	5.23226e+08	1.51348e+09	1.29978e+09	1.67573e+09	1.58442e+09	5.61587e+08	1.41791e+09	1.56265e+09	1.3828e+09	1.60225e+09	9.09061e+08	6.4884e+08	6.03588e+08	4.63173e+08	4.52671e+08	5.49072e+08	7.15047e+08	5.5006e+08	8.35804e+08	6.51775e+08	8.50743e+08	6.525e+08	5.55507e+08	8.41099e+08	1.12801e+09	1.37382e+09	1.49044e+09
AT1G24050.1	139209	117892	50571.2	118144	486879	394746	123335	136115	120104	137087	204186	180409	323854	381100	134513	144627	160940	177663	174105	159737	392055	365969	196382	174730	246674	183836	481516	313941	167325	173024	326950	347532	484517	480650	324676	437005	901555	757402	434479	339304	275159	175645	729328	369082	369435	247782	357442	286860
AT1G24100.1	1.64253e+08	6.07323e+07	8.90631e+07	5.72615e+07	1.18194e+08	1.27082e+08	8.43976e+07	9.62537e+07	8.56097e+07	7.93677e+07	9.52973e+07	1.00008e+08	1.14102e+08	9.74904e+07	1.20566e+08	9.47297e+07	8.63393e+07	8.38706e+07	9.81727e+07	8.64245e+07	1.13522e+08	1.35881e+08	9.31341e+07	7.65156e+07	7.70294e+07	8.18077e+07	1.24056e+08	9.49319e+07	9.83316e+07	5.94317e+07	1.1243e+08	1.12509e+08	1.35459e+08	1.2791e+08	1.35624e+08	1.2066e+08	1.90447e+08	1.58656e+08	1.23389e+08	9.927e+07	1.19466e+08	8.8734e+07	1.52601e+08	1.27004e+08	1.21866e+08	9.2997e+07	1.47115e+08	8.4543e+07
AT1G24180.1	4.09411e+08	1.74297e+08	3.50196e+08	2.06711e+08	2.38927e+08	2.15009e+08	2.33611e+08	2.31303e+08	2.70266e+08	2.28883e+08	2.00649e+08	2.51183e+08	2.95018e+08	2.78188e+08	1.96646e+08	2.02483e+08	1.82543e+08	1.97287e+08	2.87558e+08	2.70738e+08	2.90121e+08	2.74717e+08	2.94142e+08	2.3575e+08	2.63139e+08	2.26661e+08	1.68463e+08	2.02222e+08	3.5286e+08	2.71732e+08	2.35165e+08	1.60068e+08	233860790	2.1948e+08	1.89279e+08	1.72765e+08	2.52764e+08	2.07561e+08	1.69436e+08	1.54102e+08	1.63389e+08	1.28503e+08	2.43423e+08	1.94676e+08	229460440	1.97366e+08	3.85448e+08	2.36167e+08
AT1G24280.1	3.48521e+06	429355	2.34194e+06	1.22774e+06	3.26312e+06	3.51706e+06	1.79055e+06	1.96334e+06	1.75237e+06	1.00694e+06	1.92689e+06	2.75108e+06	3.10524e+06	2.83133e+06		1.63416e+06	2.65211e+06	1.33355e+06	2.55553e+06	2.70832e+06	996213	1.47415e+06	2.81369e+06	1.33166e+06	426602	452099	1.38922e+06		1.53605e+06	294699				1.04982e+06			1.6853e+06	1.42907e+06	817000			314049	1.32985e+06		423263		1.60087e+06	1.10658e+06
AT1G24300.1	2.20261e+06	90971.6	690755		212719	1.82724e+06		517966	1.25456e+06	1.17181e+06	564339	1.40949e+06	1.96101e+06	1.95507e+06	405692	646058	1.78901e+06	79885.3	289014		641308	633289	1.16649e+06	955427			1.64544e+06	518072			2.31834e+06	2.26432e+06	685772	1.65619e+06	300233	736339	2.36551e+06	2.95637e+06	2.29295e+06	1.40792e+06	282389		531102	575845	1.02817e+06	563756		902744
AT1G24360.1	1.96839e+08	1.10237e+08	1.75323e+08	1.49248e+08	1.80456e+08	1.89986e+08	1.08765e+08	109514716	1.32711e+08	1.24114e+08	97418975	1.9168e+08	1.72604e+08	1.53674e+08	1.25879e+08	9.63454e+07	123575602	9.70862e+07	1.64037e+08	1.37957e+08	2.03886e+08	2.25712e+08	1.95739e+08	92999181	1.15274e+08	1.29893e+08	1.61624e+08	1.85935e+08	1.41792e+08	1.25304e+08	1.88402e+08	1.67633e+08	1.82879e+08	2.13688e+08	1.16602e+08	1.22974e+08	2.03388e+08	2.32473e+08	1.35253e+08	1.46574e+08	1.04419e+08	8.99305e+07	1.96805e+08	1.69283e+08	1.9771e+08	1.87015e+08	2.16503e+08	1.20167e+08
AT1G24510.1	1.11432e+09	5.9365e+08	7.84442e+08	5.11761e+08	5.31053e+08	4.8373e+08	5.85998e+08	6.3109e+08	6.31124e+08	5.07592e+08	4.50717e+08	5.59381e+08	7.01187e+08	6.23964e+08	5.05897e+08	5.14092e+08	4.13341e+08	4.0196e+08	5.97243e+08	5.53844e+08	5.66047e+08	5.47018e+08	6.22227e+08	5.1581e+08	8.80467e+08	8.142e+08	4.5284e+08	7.23092e+08	9.13552e+08	7.2972e+08	6.74326e+08	4.74264e+08	5.98292e+08	5.48486e+08	4.79302e+08	4.45279e+08	5.57888e+08	5.71992e+08	4.41028e+08	4.38567e+08	4.273e+08	3.55816e+08	7.79171e+08	5.79206e+08	5.43864e+08	5.4123e+08	9.50209e+08	8.07172e+08
AT1G24610.1	18648090	5.07391e+06	1.20163e+07	4.33434e+06	9.75828e+06	1.17996e+07	5.6929e+06	4.91024e+06	5.27895e+06	4199528	8.61975e+06	7.54015e+06	8.66899e+06	6.67215e+06	7.74377e+06	5.50435e+06	10818612	6.67387e+06	6.79531e+06	5.68972e+06	8.40442e+06	7.96043e+06	7.62755e+06	6.27891e+06	5.50982e+06	4.06063e+06	8.71163e+06	5.84715e+06	6.88148e+06	4693611	4.87467e+06	4.28793e+06	7173648	7.36596e+06	6.753e+06	5.95056e+06	1.75638e+07	8.33894e+06	6.68494e+06	5.42467e+06	6653999	5.53441e+06	9.52784e+06	8.15588e+06	9.51987e+06	7.31753e+06	1.01197e+07	5.88047e+06
AT1G25260.1	3.47291e+07	2.27568e+07	1.49029e+07	31089.8	1.27629e+06	1.55171e+06	1.31774e+07	1.78167e+07	1.74521e+07	1.901e+07	8.57267e+06	1.40889e+07	4.33356e+07	4.78035e+07	1.11679e+07	2.1754e+07	8.67263e+06	1.36837e+07	1.34907e+07	23278849	1.23674e+06	1.05331e+06	2.24466e+07	2.40609e+07	3.35616e+07	4.45204e+07	477254	314489	439203	349852	3.62301e+07	490804	1.19835e+06	1.12712e+06	780435	467068	2.21777e+06	1296216	384028	828463	611111	81239.7	2.37053e+06	571148	578267	358439	966137	868508
AT1G25350.1	1.07915e+08	5.43405e+07	7.27599e+07	5.31424e+07	1.46645e+08	1.43194e+08	8.71889e+07	9.06535e+07	9.99875e+07	9.30674e+07	1.01944e+08	1.17343e+08	143943331	1.398e+08	1.02226e+08	8.67455e+07	8.11677e+07	8.39807e+07	1.20761e+08	1.10026e+08	1.71699e+08	1.73683e+08	119037136	9.23726e+07	7.70554e+07	6.77223e+07	1.1483e+08	9.76034e+07	1.24658e+08	1.079e+08	1.14972e+08	1.03102e+08	1.63648e+08	1.57744e+08	1.23195e+08	1.2015e+08	1.85582e+08	1.32352e+08	1.17973e+08	1.06535e+08	8.80431e+07	5.87827e+07	1.88143e+08	1.36456e+08	1.27999e+08	1.02165e+08	175321376	1.10145e+08
AT1G25490.1	1.79451e+08	9.36454e+07	1.41584e+08	8.87042e+07	2.23958e+08	2.36526e+08	1.56421e+08	1.62729e+08	1.71406e+08	1.62822e+08	1.69391e+08	2.02555e+08	2.50909e+08	2.29118e+08	1.63226e+08	1.33953e+08	1.5672e+08	1.47221e+08	1.90162e+08	1.70535e+08	2.69358e+08	2.54943e+08	2.10344e+08	1.53282e+08	1.26323e+08	1.14031e+08	1.8663e+08	1.56735e+08	2.46916e+08	1.83745e+08	1.89956e+08	1.40637e+08	2.48216e+08	2.15559e+08	1.54916e+08	1.56316e+08	263393135	2.1302e+08	1.75757e+08	1.55698e+08	9.49757e+07	9.30801e+07	2.7723e+08	1.94808e+08	1.63605e+08	1.25444e+08	1.85841e+08	1.51979e+08
AT1G26110.1	2.24999e+06	1.15794e+06	1.69532e+06	1509950	6.0303e+06	4581296	1.99157e+06	2.79842e+06	3.15991e+06	2931141		2.28567e+06	4.95859e+06	5.86067e+06	3.59441e+06	3.50801e+06	2998640	2.44301e+06	4270080	3.5685e+06	5384745	5536391	2.66362e+06		1.09737e+06		806859	972118	2537645	2.14819e+06	3260863	796263	2.10595e+06	1.73028e+06			5.77876e+06	3.3099e+06		1.50334e+06		440660	3677551	1219045	1274130		5.71153e+06
AT1G26160.1	25903.6	37049.8	39626.9	59393.5	177709	210994	34910.1	44697.1					100002	100702	95071						83616.6	82535.8					157908	158340	14022.9	16877.8	248042	249479	254545	185007	172642	175322	546688	417135	224864	205919	180608	120362	300363	211424		89435.5	138745	146160
AT1G26230.1	2.51118e+06	2.01504e+06	2.91036e+06	2.93543e+06	8260834	9285606	4.19735e+06	4790224	4860128	4780855	4044686	5.97597e+06	7.83172e+06	6.85198e+06	5.65623e+06	4093837	5.38396e+06	3.48815e+06	5.97998e+06	5567658	8487636	8533246	5.73403e+06	3.71556e+06	6149228	5581629	9917850	11243991	7317787	7584767	9964693	6856300	9961494	10726535	5.43007e+06	5.57624e+06	12388969	13661144	9153801	9078821	6715383	4517630	13340514	10578460	7581926	6.52269e+06	8567322	4837708
AT1G26340.1		1.55501e+06	5053948	6.41029e+06	135444		1.61797e+06					93069.5								146068				123447	6.94546e+06	4895660			3.87754e+06		1.88518e+06									139860	857247	643247						926401
AT1G26460.1	1.39358e+07	7.81672e+06	7.78146e+06	6.46394e+06	3.14932e+07	3.289e+07	1.14595e+07	1.42463e+07	1.18584e+07	1.1992e+07	1.17334e+07	1.75797e+07	3.57151e+07	2.81159e+07	1.40927e+07	1.89228e+07	1.17432e+07	1.11455e+07	1.69658e+07	1.41304e+07	2.51088e+07	2.49094e+07	1.60223e+07	1.24469e+07	1.54443e+07	1.24275e+07	2.23846e+07	22385841	2.27221e+07	2.49182e+07	2.23665e+07	2.19498e+07	2.17631e+07	3.09657e+07	2.82053e+07	2.40317e+07	2.63592e+07	2.56253e+07	2.61158e+07	2.41449e+07	1.3047e+07	9.83823e+06	4.11928e+07	1.76439e+07	2.51889e+07	1.72724e+07	3.30175e+07	2.2203e+07
AT1G26630.1	5.7063e+08	2.07323e+08	7.44561e+08	3.24085e+08	3.30745e+08	3.23577e+08	2.57845e+08	2.12688e+08	3.52584e+08	1.61147e+08	2.03294e+08	2.34632e+08	4.46017e+08	2.67456e+08	1.79061e+08	1.73266e+08	1.6575e+08	1.54517e+08	3.47315e+08	2.10437e+08	2.34455e+08	2.28999e+08	2.38356e+08	1.56663e+08	4.90551e+08	4.29575e+08	3.26632e+08	2.97722e+08	1.12975e+09	6.33511e+08	2.6962e+08	2.30891e+08	3.71131e+08	3.83619e+08	2.73016e+08	2.43209e+08	4.99579e+08	3.49954e+08	3.29273e+08	2.98298e+08	1.46826e+08	7.81109e+07	3.07634e+08	2.41152e+08	2.46512e+08	1.95241e+08	1.07746e+09	3.26574e+08
AT1G26815.1	15025828	8217457	8301933	4997326	12782092	11854205	14297327	14051752	19928344	15938816	15057037	12400393	18384404	16099422	7621511	6057477	13188579	12675027	17121090	14882095	17330644	16993062	12627633	9525733	8877027	6858670	16030709	14210017	28487706	18758932	11989202	10566608	13292012	11054713	8033699	7.7997e+06	13486244	9508494	9106954	8900153	8404660	5.18242e+06	10707810	6123367	7011873	6.59444e+06	12496708	5.97229e+06
AT1G26830.1	739106	2.05801e+06	2.53414e+06	1.7964e+06	7.10433e+06	7.01616e+06	3.98416e+06	4.25847e+06	5.33693e+06	5.29158e+06	6.27638e+06	7.29788e+06	7.57768e+06	6.53597e+06	5.15782e+06	3.18218e+06	3099783	4.74974e+06	4.25026e+06	63828.1	6.3005e+06	5679737	4.48658e+06	3.48257e+06	5.30417e+06	4.70931e+06	7.07624e+06	6.95279e+06	5.19417e+06	6.0036e+06	7.56593e+06	6.00942e+06	9.77908e+06	9.67321e+06	7.52647e+06	7.66231e+06	1.1248e+07	1.12253e+07	6.8197e+06	6.77061e+06	4.78589e+06	2.80175e+06	1.23641e+07	9.17655e+06	7.59685e+06	5.68837e+06	8.20902e+06	5.47e+06
AT1G26850.1	8.2408e+07	2.70455e+07	4.39298e+07	2.07699e+07	7.22579e+07	7.95918e+07	3.92998e+07	3.0426e+07	3.38215e+07	3.83449e+07	4.49398e+07	4.71946e+07	5.86842e+07	4.70911e+07	3.71604e+07	3.12428e+07	4.4401e+07	3.41734e+07	4.87633e+07	3.04428e+07	6.72249e+07	5.18633e+07	5.69936e+07	4.13195e+07	2.90954e+07	3.02593e+07	5.24318e+07	4.12466e+07	4.50335e+07	3.8339e+07	5.46197e+07	5.18609e+07	7.55649e+07	7.7114e+07	7.73731e+07	6.70329e+07	9.3838e+07	7.15911e+07	5.8738e+07	4.90365e+07	5.41309e+07	3.51243e+07	1.00415e+08	8.33589e+07	7.21457e+07	5.12171e+07	7.05507e+07	4.76756e+07
AT1G26880.1	1.89811e+09	9.21428e+08	1.58639e+09	8.16395e+08	8.18503e+08	6.86448e+08	9.18609e+08	8.2488e+08	856510582	5.95659e+08	6.9527e+08	569486618	8.25158e+08	6.00428e+08	7.64808e+08	6.74585e+08	5.70004e+08	5.60915e+08	8.69873e+08	5.60657e+08	6.59003e+08	6.03632e+08	8.14583e+08	5.41303e+08	1.27435e+09	1.22926e+09	7.25163e+08	7.54204e+08	1.25671e+09	1.14281e+09	694428380	6.15497e+08	8.22286e+08	8.09885e+08	6.59284e+08	5.65587e+08	1.10521e+09	7.3731e+08	8.2219e+08	681422863	6.02351e+08	4.43737e+08	7.16708e+08	6.56117e+08	6.33865e+08	5.61391e+08	1.4629e+09	9.74857e+08
AT1G27020.1	3.67636e+06	3.56991e+06	12562.8	1.71539e+06	1.31125e+07	1.25877e+07	2.67765e+07	2.89611e+07	2.9658e+07	2.32123e+07	4.89925e+07	5.5038e+07	1.29423e+07	6.84864e+06	1.7632e+07	1.80554e+07	2.19743e+06	1.95123e+06	3.6686e+07	3.28385e+07	5.80077e+07	5.88586e+07	4.30311e+07	3.62391e+07	4.33744e+06	4.13022e+06	1.03435e+07	9.93808e+06	1.12714e+07	1.12271e+07	1.29102e+07	1.12645e+07	4.00639e+07	4.04804e+07	5.12747e+07	4.70832e+07	2.29754e+07	2.1204e+07	2.68786e+07	2.45907e+07	1.57562e+07	9.1781e+06	8.91795e+07	6.43651e+07	5.12295e+07	4.56236e+07	7.90291e+07	4.28419e+07
AT1G27090.1	2.10249e+08	5.77887e+07	1.20064e+08	7.07507e+07	5.29739e+07	5.81545e+07	5.90656e+07	3.90814e+07	4.97815e+07	4.10998e+07	5.76901e+07	5.90979e+07	5.89125e+07	5.24526e+07	4.96158e+07	4.03579e+07	6.65512e+07	5.95759e+07	5.64319e+07	4.87028e+07	5.63029e+07	6.20237e+07	7.2728e+07	5.16478e+07	9.37219e+07	8.98908e+07	5.08303e+07	3.54717e+07	8.23064e+07	3.35781e+07	4.39489e+07	3.62778e+07	5.71257e+07	4.6544e+07	6.76274e+07	4.6078e+07	7.12988e+07	6.23582e+07	5.46935e+07	3.77157e+07	6.23651e+07	3.61874e+07	7.25975e+07	5.26106e+07	5.26802e+07	3.49516e+07	8.91777e+07	3.69005e+07
AT1G27130.1	4.80059e+07	2.43313e+07	2.87193e+07	3.70588e+07	7.57441e+07	6.54389e+07	3.52883e+07	4.09603e+07	1.96778e+07	1.73662e+07	5.8957e+07	5.04539e+07	3.09494e+07	2.66029e+07	5.26939e+07	5.2677e+07	1.77616e+07	2.90242e+07	6.42178e+07	1.82076e+07	7.99864e+07	6.46888e+07	2.16834e+07	1.76555e+07	1.13006e+07	8.69438e+06	7.33701e+07	1.21488e+07	2.81374e+07	2.2327e+07	3.16757e+07	1.92918e+07	4.26141e+07	8.95581e+07	8.96533e+07	9.42012e+07	1.19569e+08	9.73086e+07	7.99149e+07	1.7641e+07	7.75095e+07	9.70607e+06	1.22062e+08	9.94579e+07	2.35485e+07	1.4787e+07	3.89028e+07	2.01209e+07
AT1G27310.1	2.99548e+07	2.10904e+07	3.18885e+07	2.36703e+07	4.88233e+07	5.03413e+07	4.33142e+07	4.68352e+07	4.67896e+07	4.37419e+07	4.54467e+07	5.52981e+07	5.77894e+07	4.94466e+07	4.29177e+07	3.69186e+07	3.43277e+07	3.17397e+07	5.20053e+07	4.71738e+07	5.66297e+07	6.6648e+07	5.5519e+07	3.61025e+07	4.51674e+07	3.92216e+07	5.59797e+07	4.74166e+07	7.08712e+07	4.25003e+07	5.94217e+07	4.84382e+07	53999128	5.323e+07	3.6214e+07	4.28439e+07	5.16167e+07	4.90896e+07	4.80146e+07	4.8197e+07	4.51735e+07	3.28639e+07	5.5773e+07	5.82618e+07	6.47581e+07	5.6398e+07	8.29978e+07	4.21996e+07
AT1G27390.1	9201816	4.07757e+06	8626682	4964080	7.2209e+06	6798187	7000797	4.80909e+06		5656737	5253545	6981248	8321322	8234171	6.82804e+06	5.57165e+06	6155251	5377210	6.66461e+06	5.9251e+06	8754061	7852185	8970726	6411763	5728278	4757483	6.74461e+06	5922767		8.03595e+06	8433826	3.86105e+06	9243011	7.64602e+06	6.37359e+06	6459015	9987463	7584384	6.54164e+06	6.09697e+06	5957353	3956708	10125822	7.13536e+06	7.998e+06	7296627	10316656	7.47257e+06
AT1G27400.1	1.86074e+09	7.78335e+08	1.04663e+09	6.80532e+08	1.00918e+09	8.26812e+08	9.15587e+08	1.01033e+09	1.02062e+09	4.63744e+08	9.04811e+08	1.10837e+09	1.55917e+09	1.44481e+09	1.00434e+09	1.05461e+09	9.23526e+08	1.09811e+09	1.12127e+09	1.14357e+09	1.02129e+09	6.93949e+08	1.36194e+09	5.26855e+08	1.08134e+09	1.06438e+09	7.16856e+08	1.23661e+09	1.61084e+09	1.07667e+09	1.48584e+09	1.27392e+09	8.95938e+08	8.01291e+08	1.19181e+09	8.53974e+08	9.98409e+08	7.74731e+08	1.08913e+09	1.30302e+09	9.91668e+08	9.99466e+08	1.2956e+09	9.11756e+08	1.45037e+09	1.41468e+09	1.70321e+09	1.18785e+09
AT1G27430.1	2.63435e+06	241038	1.8863e+06	1.02563e+06		33099.5	275941	54273.8	387587		9374.55						10929.2								1.59701e+06	1658865	11803.1		1075823	771865				6878.64	24888.3				29035.5					6646.05			844256	136667
AT1G27450.4	2.00699e+08	1.03831e+08	8.81709e+07	5.49232e+07	1.35576e+08	1.53311e+08	1.00108e+08	1.23985e+08	9.73547e+07	1.13846e+08	1.39539e+08	1.58012e+08	1.25526e+08	1.29942e+08	1.14182e+08	1.22075e+08	1.44892e+08	1.47098e+08	1.33305e+08	1.77071e+08	1.71431e+08	1.91127e+08	1.45662e+08	1.59707e+08	1.01843e+08	9.225e+07	1.43531e+08	1.16403e+08	8.91213e+07	1.12423e+08	1.52796e+08	1.27022e+08	1.82807e+08	1.53225e+08	1.1279e+08	1.44261e+08	2.46655e+08	1.82769e+08	1.60921e+08	1.28155e+08	1.08949e+08	1.06048e+08	2.16313e+08	1.72696e+08	1.70675e+08	1.36324e+08	1.27006e+08	1.18738e+08
AT1G27530.1	2.9864e+07	2.54306e+07	3.35505e+07	2.9607e+07	5.80644e+07	4.58821e+07	4.18503e+07	4.47011e+07	4.20024e+07	4.01237e+07	3.64191e+07	4.70817e+07	6.444e+07	4.93573e+07	4.08807e+07	3.88013e+07	3.182e+07	3.21026e+07	3.67205e+07	3.78283e+07	4.67582e+07	4.82813e+07	4.04154e+07	3.43599e+07	4.91981e+07	4.74411e+07	4.77047e+07	4.98271e+07	4.37134e+07	3.60047e+07	5.26401e+07	4.73741e+07	4.98847e+07	5.79019e+07	4.71795e+07	4.63171e+07	3.02122e+07	5.73723e+07	4.83134e+07	5.49117e+07	4.31324e+07	3.94173e+07	7.47013e+07	7.15421e+07	4.92126e+07	5.39704e+07	6.30892e+07	4.1778e+07
AT1G27650.1	9753161	4.3965e+06	2.56058e+06	4.84547e+06	1.49509e+07	1.37819e+07	6264545	7577076	8235329	7345782	5.36976e+06	9052514	1.80397e+07	14496997	6.98938e+06	1.06562e+07	6.64476e+06	5.79808e+06	6876011	8.14263e+06	1.01215e+07	1.25032e+07	7.65679e+06	7.51185e+06	7.39176e+06	5.70453e+06	12803056	8260024	9102444	18430530	9296111	7.83185e+06	13896556	14032371	1.45976e+07	1.35496e+07	22117154	19551232	13422220	1.00031e+07	10184785	4.64568e+06	13687550	7412069	9440874	5.8783e+06	12419853	10183187
AT1G27680.1	4.01041e+06	22773446	2.49734e+07	20043117	5.3053e+07	4.5996e+07	28681798	3.21577e+07	3.13068e+07	2.9908e+07	2.11587e+07	4.9495e+07	4.36866e+07	3.98621e+07	5.20989e+07	3.82454e+07	3.8607e+07	33248049	3.32857e+07	2.92694e+07	5.53711e+07	5.10541e+07	6.58265e+07	33568050	2.41774e+07	2.03611e+07	4.43657e+07	3.1891e+07	34710665	2.76468e+07	6.14915e+07	4.14001e+07	5.06539e+07	7.27572e+07	4.74576e+07	4.3308e+07	7.60611e+07	7.52252e+07	4.67629e+07	6.063e+07	55874874	3.6961e+07	8.94227e+07	1.08112e+08	5.01498e+07	1.18039e+08	52329669	3.11197e+07
AT1G27930.1	700616	592496	202236	273187	1.37237e+06	3.21195e+06	524078	8.40359e+06	627772	589908	568221	1.19454e+07	1277713	1.16234e+06	429385	332004	701988	756420	677504	2.59635e+06	1.30307e+06	1422048	789426	753817	640011	541098	968134	6.98446e+06	738179	723694	1076305	968985	1.62659e+06	1.43003e+06	6.93497e+06	811497	2.23425e+06	1.75665e+06	6.58981e+06	816757	677856	338530	2.15698e+06	1.2108e+06	878517	464599	652642	4.89105e+06
AT1G27950.1	1.20142e+08	4.40285e+07	8.00462e+07	3.96807e+07	78422637	83540345	3.46785e+07	4.70791e+07	62435729	5.1558e+07	31535091	4.32523e+07	1.33827e+08	112612594	6.32054e+07	7.62037e+07	50988004	6.67566e+07	64800150	6.73851e+07	3.84644e+07	32665677	87794559	7.08472e+07	103282702	81158604	1.00764e+08	91493624	135767601	89253953	1.22359e+08	102615147	131446914	106799646	116012074	90546577	45263814	7.28749e+07	130119031	100943700	60567039	5.58459e+07	107683681	7.45984e+07	91175671	60981383	97051207	56832458
AT1G27970.1	3.17833e+08	1.29707e+08	2.20035e+08	1.22631e+08	2.49387e+08	2.45363e+08	2.18702e+08	2.02706e+08	2.01191e+08	1.89469e+08	2.28539e+08	2.67047e+08	2.32754e+08	2.12553e+08	2.00078e+08	1.60555e+08	1.87687e+08	1.65247e+08	2.44203e+08	2.02924e+08	2.96435e+08	2.89557e+08	2.88242e+08	2.14967e+08	1.87244e+08	1.77657e+08	2.32575e+08	1.91757e+08	2.51973e+08	1.90843e+08	2.38641e+08	2.12391e+08	2.68386e+08	2.82388e+08	2.56556e+08	2.34704e+08	3.64822e+08	2.72752e+08	2.38078e+08	2.15748e+08	2.21327e+08	1.6725e+08	3.58557e+08	3.27928e+08	3.26414e+08	2.87411e+08	4.26046e+08	2.24602e+08
AT1G28130.1	3.40475e+07	2.63148e+06	2.87159e+06	10037225	5.22977e+06	7.12833e+06	2.46725e+07	22097872	2.00364e+07	2.7747e+07	2.85448e+07	2.19221e+07	9.51666e+06	1.93337e+07	3.35706e+06	3.18138e+06	1.91919e+07	3.56193e+06	26183422	2.28933e+07	4.55182e+07	4.07001e+07	1.83306e+07	5.43669e+06	1.15371e+07	9.41324e+06	6.71996e+06	2.71409e+07	6.6317e+07	4.77811e+07	23304580	6.13279e+06	50501083	40295612	3.1193e+07	3.95181e+07	9.81636e+06	3.14497e+07	5.06767e+06	4.27658e+06	22362445	1.36213e+06	3.68892e+07	3.43873e+07	8.30699e+06	1.87597e+07	5.60876e+07	25374103
AT1G28200.1	1.21426e+08	4.63262e+07	7.78486e+07	31951534	4.81418e+07	43549540	58275130	5.78702e+07	6.23217e+07	5.64722e+07	5.81605e+07	6.7001e+07	5.42618e+07	5.17781e+07	4.82278e+07	4.09706e+07	6.16573e+07	5.35488e+07	5.81991e+07	5.51131e+07	6.15809e+07	46975892	79257850	7.00262e+07	5.48053e+07	4.39926e+07	4.29108e+07	4.61853e+07	7.53473e+07	5.07323e+07	66088372	5.24916e+07	6.20903e+07	4.83827e+07	5.28751e+07	4.39653e+07	63625205	4.12779e+07	3.8915e+07	3.66057e+07	51930842	39383459	66886968	5.78435e+07	7.21079e+07	6.92937e+07	85806875	5.44826e+07
AT1G28290.1	1.57248e+08	6.19392e+07	1.2112e+08	4.93706e+07	1.56712e+08	1.87616e+08	8.38776e+07	8.07246e+07	8.60849e+07	7.79961e+07	6.88503e+07	8.60641e+07	1.41662e+08	1.2653e+08	9.309e+07	8.2547e+07	8.04157e+07	8.01953e+07	1.01873e+08	9.00429e+07	1.3437e+08	1.38208e+08	8.93003e+07	7.10002e+07	9.49099e+07	9.30817e+07	1.07078e+08	1.0355e+08	1.2262e+08	7.56885e+07	8.36453e+07	9.62878e+07	1.18242e+08	9.88117e+07	7.06186e+07	8.48149e+07	9.82294e+07	9.46426e+07	1.13921e+08	8.46844e+07	1.06809e+08	8.64624e+07	1.37537e+08	9.13513e+07	1.06883e+08	1.01196e+08	1.23031e+08	7.47706e+07
AT1G28350.2	17543846	12822630	13344142	11376535	16391680	11187353	20167952	21534130	22804288	22888674	19173298	31141796	28481210	26922230	22077248	21640924	16974088	18613942	26380702	24167188	22713976	31117624	27935144	19805252	25538180	25499884	26901508	30104482	20441106	18871502	29825486	25489966	31826000	28891126	22506884	22912544		4.2797e+06	25231572	29306516	21793200	20545926	41100228	33128406	35910728	36584900	34704032	24419596
AT1G28660.1	199834	221578	137614	175053	557583	586095	328568	381085	330550	316605	535774	541271	344653	492468	304368	264779	255844	287501	448138	434493	816919	983919	632053	602091	395758	379834	517374	525134	321338	316294	735872	709616	1.02223e+06	900800	563462	603625	1.18626e+06	891447	637092	579030	442793	317026	1.62628e+06	995873	947103	667344	746454	719116
AT1G28670.1	1.00277e+07	3321518	6.37482e+06	3.83151e+06	7.0016e+06	6.67544e+06	5.08432e+06	4.9023e+06	5206729	4298326	5008656	6650916	6.77649e+06	4.78134e+06	5481688	4.46272e+06	5132283	3481640	5841857	4.0467e+06	7.66052e+06	5.29575e+06	6.66983e+06	4.68894e+06	4.48484e+06	4.19049e+06	7492169	5.57141e+06	9883102	3950758	8.73066e+06	5.40145e+06	7541001	6658933	4.80462e+06	5048292	7579609	7.43847e+06	262731	7.01577e+06	5502112	3.91388e+06	6361631	8.547e+06	5.46866e+06	10083417	1.00182e+07	4.42119e+06
AT1G28680.1	6.48343e+06	1.38352e+07	1.7377e+07	4.99737e+06	1.60886e+07	4.78575e+07	2.40827e+07	2.69323e+07	3.17078e+07	2.82852e+07	2.78244e+07	3.46846e+07	4.08461e+07	3.94884e+07	2.83916e+07	2.40069e+07	2.50675e+07	2.34441e+07	3.69665e+07	3.49616e+07	5.09415e+07	5.26745e+07	3.63364e+07	2.68584e+07	2.48247e+07	2.2867e+07	3.40868e+07	30877123	8.95853e+06	8.77917e+06	3.84874e+07	3.393e+07	4.58133e+07	4.43681e+07	3.96865e+07	3.72962e+07	1.71257e+07	4.84706e+07	3.30784e+07	3.0974e+07	2.78824e+07	1.91188e+07	5.3765e+07	4.10395e+07	2.93949e+07	2.76852e+07	4.81369e+07	2.74331e+07
AT1G28960.3	8487024	2.0295e+06	6.37252e+06		2.09456e+06	3057983	2.9383e+06	4999829	4.90181e+06	4843997	3108086	6719627	5570191	4.54107e+06	4.67625e+06	2.5337e+06	3.00827e+06	5.96667e+06	6.16495e+06	4.00957e+06	3.79827e+06	4.15491e+06	5.87344e+06	5.6034e+06	2303088	2.98664e+06	3281632	2179297	5263834	4204979	3125516	3.73449e+06	5821397	4.15632e+06	6.793e+06	4.49456e+06			4583677	2.98698e+06	1.86252e+06	2.25789e+06	4922447	4.4165e+06	5557749	4379716	4.35005e+06	2419440
AT1G29150.1	1.29083e+09	5.38691e+08	8.67689e+08	5.50666e+08	1.07941e+09	1.08459e+09	8.21938e+08	8.64715e+08	9.47932e+08	8.9866e+08	8.2685e+08	1.02165e+09	1.33286e+09	1.23438e+09	9.25836e+08	8.08049e+08	8.32696e+08	8.46058e+08	1.10554e+09	9.84694e+08	1.20686e+09	1.25217e+09	1.1687e+09	8.95147e+08	8.00795e+08	7.72827e+08	1.03677e+09	9.2663e+08	1461793334	1.15555e+09	1.03814e+09	9.22716e+08	1.31083e+09	1.25715e+09	9.85892e+08	9.17855e+08	1.13197e+09	1.22812e+09	9.92721e+08	9.64976e+08	7.72069e+08	6.36418e+08	1.5177e+09	1.25234e+09	1.27952e+09	1.10033e+09	1.38613e+09	8.38475e+08
AT1G29250.1	4.94496e+08	1.71632e+08	2.8537e+08	3.48371e+08	2.48838e+08	2.27984e+08	2.21599e+08	2.09314e+08	2.1743e+08	1.93198e+08	2.29812e+08	2.24533e+08	3.03101e+08	2.64426e+08	3.1323e+08	2.23274e+08	2.22426e+08	1.93251e+08	2.6152e+08	2.25184e+08	2.71464e+08	2.65474e+08	2.64375e+08	2.25603e+08	2.02855e+08	1.72067e+08	2.03288e+08	2.11711e+08	3.15513e+08	2.36448e+08	2.68797e+08	2.16301e+08	2.56922e+08	2.37214e+08	2.93634e+08	2.50926e+08	3.02907e+08	2.57346e+08	2.34719e+08	2.03821e+08	2.25915e+08	1.74225e+08	3.02391e+08	2.60219e+08	2.24154e+08	1.98819e+08	3.92672e+08	2.36976e+08
AT1G29310.1	6.82807e+08	2.69758e+08	3.71945e+08	1.30444e+08	1.37723e+08	1.22292e+08	2.48361e+08	2.29388e+08	2.96568e+08	2.28878e+08	1.61032e+08	2.21856e+08	2.52697e+08	1.97982e+08	2.04544e+08	2.16993e+08	1.81903e+08	1.8612e+08	2.72541e+08	2.33117e+08	1.66291e+08	1.63513e+08	3.07656e+08	2.88117e+08	3.79388e+08	3.25118e+08	1.70579e+08	1.4391e+08	3.26579e+08	2.21446e+08	1.95999e+08	1.76892e+08	2.81077e+08	1.93182e+08	2.29118e+08	2.07077e+08	1.89805e+08	1.69555e+08	1.6264e+08	1.71694e+08	1.2936e+08	1.47542e+08	3.31321e+08	2.50813e+08	2.80821e+08	2.59923e+08	3.42102e+08	2.20175e+08
AT1G29320.2	5.23858e+06	2.81942e+06	4.47389e+06	6.94059e+06	1.16858e+07	9123431	5.62178e+06	5.13892e+06	4.84464e+06	8.77033e+06	6.02632e+06	6.96375e+06	9.46704e+06	1.08157e+07	5.55577e+06	5.89326e+06	5.53753e+06	5.87508e+06	6.33075e+06	6.95162e+06	1.12902e+07	1.0029e+07	7.29222e+06	6.66121e+06	6.39451e+06	6.55141e+06	5.8818e+06	7.6411e+06	6.23447e+06	5968468	8.75956e+06	5.26524e+06	8.72057e+06	7.7954e+06	21128328	1.20748e+07	1.10716e+07	1.11516e+07	7.69597e+06	6.87565e+06	6.71367e+06	4.41325e+06	1.34681e+07	1.08712e+07	8.33626e+06	6.49753e+06	1.76014e+07	5.31311e+06
AT1G29350.1	1.82805e+08	4.648e+07	1.0231e+08	4.14832e+07	7.66338e+07	6.97236e+07	5.55195e+07	43434994	6.66506e+07	6.41077e+07	7.96224e+07	6.98849e+07	7.08164e+07	6.25176e+07	6.53549e+07	5.02486e+07	8.27616e+07	7.10125e+07	6.69487e+07	5.41767e+07	70517778	6.48329e+07	7.29235e+07	6.1108e+07	5.3627e+07	5.2372e+07	6.86094e+07	62997719	9.07604e+07	57336454	6.66661e+07	57750093	6.57353e+07	5.7299e+07	6.18918e+07	4.9761e+07	100217798	6.55959e+07	6.9219e+07	5.65679e+07	72248662	6.05764e+07	8.84169e+07	7.15804e+07	7.04252e+07	6.06142e+07	1.07546e+08	5.76703e+07
AT1G29470.2	2.35277e+07	1.39365e+07	2.68566e+07	1.3573e+07	4.68013e+07	39699323	1.92334e+07	1.7061e+07	1.96209e+07	1.68691e+07	3.17389e+07	1.75469e+07	3.09985e+07	2.13507e+07	3.346e+07	2.24672e+07	1.88646e+07	1.76373e+07	3.59004e+07	1.74457e+07	3.26368e+07	2.64551e+07	3.25516e+07	2.60259e+07	2.56044e+07	1.86981e+07	1.89784e+07	2.35978e+07	1.89114e+07	1.52412e+07	2.66752e+07	2.87395e+07	2.76091e+07	2.50348e+07	2.69949e+07	2.17623e+07	4.51833e+07	3.0087e+07	3.21157e+07	2.75475e+07	2.65588e+07	2.11921e+07	4.87701e+07	4.11808e+07	3.28346e+07	2.65603e+07	4.82291e+07	2.87355e+07
AT1G29660.1	1.35226e+07	2.91217e+06	9.20043e+06	5.71287e+06	8.85224e+06	9.17653e+06	5.65001e+06	4.03328e+06	5.96231e+06	6.03245e+06	5.51835e+06	6.26768e+06	8.66791e+06	6.51952e+06	7.55497e+06	6.52812e+06	6.93054e+06	6.01324e+06	8.02881e+06	7.4936e+06	6.77047e+06	6.87482e+06	8.32103e+06	7.79917e+06	95057.8	5.30784e+06	6.49497e+06	5.4748e+06	5695126	142842	7.19232e+06	6.28422e+06	7.56338e+06	6.56775e+06	183732	5.41894e+06	8.22578e+06	5.76262e+06	6.70545e+06	5.47878e+06	237121	5.58588e+06	241725	4.76315e+06	7.00518e+06	6460057	1.15045e+07	125823
AT1G29670.2	5.28181e+08	1.62513e+08	378120827	1.44097e+08	1.5753e+08	1.51296e+08	1.38004e+08	1.20299e+08	1.5686e+08	1.33972e+08	1.84556e+08	1.64709e+08	1.78406e+08	1.33543e+08	1.65928e+08	1.43554e+08	1.65244e+08	1.57145e+08	1.48435e+08	1.11558e+08	1.4339e+08	1.27455e+08	1.98755e+08	1.42944e+08	1.36645e+08	1.11697e+08	1.1423e+08	1.62815e+08	1.93464e+08	1.11449e+08	8.63811e+07	7.62169e+07	9.41516e+07	8.43598e+07	92284779	7.79965e+07	1.84388e+08	9.77257e+07	1.11009e+08	7.63274e+07	1.37389e+08	8.14177e+07	9.08064e+07	8.66082e+07	9.57856e+07	6.62867e+07	1.96149e+08	1.12638e+08
AT1G29700.2	5.40416e+07	4.19962e+07	3.6693e+07	3.05411e+07	1.10266e+08	1.12522e+08	6.69274e+07	7.03344e+07	7.14544e+07	6.32791e+07	6.72958e+07	7.2185e+07	1.16723e+08	1.09048e+08	6.96149e+07	5.88874e+07	8.5544e+07	8.36929e+07	7.55305e+07	7.0043e+07	1.03512e+08	9.51303e+07	7.78179e+07	6.83181e+07	5.35179e+07	4.58424e+07	7.1579e+07	6.33763e+07	7.23523e+07	6.28117e+07	5.86424e+07	5.17423e+07	7.5744e+07	6.70281e+07	5.83338e+07	5.61648e+07	1.20327e+08	1.06947e+08	6.17202e+07	5.3987e+07	5.6421e+07	3.51827e+07	9.36909e+07	67501114	5.83256e+07	5.19962e+07	6.657e+07	3.65464e+07
AT1G29790.2	330218	293673	204328	215539	1.28213e+06	1.41945e+06	345929	354342	382042	311986	408090	524956	481112	862594	337962	337669	413152	422496	452482	410771	989871		535467	555167	717851	674080	1.01513e+06	881769	664677	671149	1.24207e+06	1.22795e+06	2.13403e+06	1.62972e+06	925160	1.0465e+06	2711879	2.04502e+06	1.39336e+06	930123	700184	375116	2.61104e+06	1.44956e+06	1.2493e+06	746571	769902	620284
AT1G29850.3	1868982	1.3949e+06	663548	729215	2433979	2.45561e+06	1.82751e+06	2.01507e+06	2499202	1.68101e+06	2146551	2.12824e+06	2.71842e+06	2409353	1.5369e+06	1.07355e+06	2.05258e+06	2.22402e+06	2.50305e+06	1.74145e+06	3.4952e+06	3.90861e+06	2253595	2.00601e+06	1286655	914948	2.30674e+06	1.52542e+06	3.80286e+06	2.39661e+06	2.07413e+06	1.76893e+06	2.14348e+06	1.94525e+06	2604378	2.27322e+06	3348512	2.22641e+06	1.37621e+06	1.37742e+06	1.83224e+06	755219	2.60903e+06	1.92889e+06	1.73005e+06	1.33288e+06	3.30443e+06	1.48606e+06
AT1G29880.1	1.11496e+09	4.68108e+08	6.42052e+08	4.21818e+08	1.01501e+09	9.78775e+08	6.70615e+08	7.1063e+08	8.07571e+08	6.91875e+08	7.71971e+08	8.01387e+08	1.15067e+09	1.03247e+09	7.11551e+08	6.66881e+08	7.22802e+08	6.76922e+08	9.3491e+08	8.10057e+08	1.15962e+09	1.16836e+09	8.85792e+08	7.61265e+08	6.38307e+08	5.24516e+08	8.90745e+08	8.22266e+08	1.03309e+09	8.11469e+08	1.04232e+09	9.32633e+08	1.28122e+09	1.11614e+09	1.13398e+09	1.02368e+09	1.09151e+09	1.13858e+09	9.41453e+08	8.68819e+08	8.61367e+08	6.0536e+08	1.45713e+09	1.06115e+09	1.1235e+09	8.65051e+08	1.24836e+09	8.6265e+08
AT1G29900.1	1.67473e+09	8.65365e+08	1.01063e+09	6.62394e+08	1.2046e+09	1.18064e+09	1.0977e+09	1.0964e+09	1.11987e+09	1.00561e+09	1.01835e+09	1.29434e+09	1.59698e+09	1.48624e+09	1.12228e+09	9.96561e+08	1.08934e+09	1.08035e+09	1.26098e+09	1.13073e+09	1.2757e+09	1.44408e+09	1.28235e+09	1.04202e+09	9.71594e+08	9.31668e+08	1.05483e+09	1.08534e+09	1.42629e+09	1.1693e+09	1.09828e+09	9.96373e+08	1.34439e+09	1.23398e+09	1.13418e+09	9.95873e+08	9.42639e+08	9.68859e+08	1.10301e+09	1.05236e+09	1.04419e+09	7.04459e+08	1.63686e+09	1.22033e+09	1.25463e+09	1.09999e+09	1.71812e+09	1.07265e+09
AT1G29930.1	7.14464e+09	3.61788e+09	2.23748e+09	2.39222e+09	7.81632e+09	7.46214e+09	3.56971e+09	4.10234e+09	4.89606e+09	3.46639e+09	2.7385e+09	3.22723e+09	8.85108e+09	7.00953e+09	3.19894e+09	3.95645e+09	3.26202e+09	3.59555e+09	4.91819e+09	4.80781e+09	6.06897e+09	5.90446e+09	5.34981e+09	4.67999e+09	3.21444e+09	2.75382e+09	3.46464e+09	3.26363e+09	5.34877e+09	4.96504e+09	4.21954e+09	3.96273e+09	6.16237e+09	5.20311e+09	5.40615e+09	4.76432e+09	6.4586e+09	5.77107e+09	3.49695e+09	3.3537e+09	4.70424e+09	3.08011e+09	7.579e+09	5.29828e+09	3.18136e+09	2.48123e+09	5.09415e+09	3.26418e+09
AT1G29940.1	1.5353e+07	1.47995e+06	6.68511e+06	543699	1.50933e+07	1.21275e+07	7.29677e+06	4.1581e+06	7.61457e+06	6.97156e+06	8.71199e+06	7.96605e+06	14484861	10479881	8.80375e+06	8.2723e+06	9.15717e+06	3.21474e+06	10112282	9.17336e+06	1.43949e+07	1.31544e+07	8.62873e+06	7.27077e+06	2087200	3.57556e+06	8.51078e+06	3.64487e+06	9941359	6.00085e+06	7.36495e+06	6679638	1.07373e+07	1.02735e+07	1.49525e+07	1.30151e+07	18888389	1.24178e+07	1.03017e+07	8.49609e+06	7.85409e+06	4.60887e+06	1.76586e+07	13028617	9.5728e+06	7044572	1.35372e+07	7.01729e+06
AT1G29970.2	5.85414e+06	3.47388e+06	4.36836e+06	3.06901e+06	1.0558e+07	1.2476e+07	5.84779e+06	6.41648e+06	5.58312e+06	4.83642e+06	6.8022e+06	7.98367e+06	1.23615e+07	1.07186e+07	7.08506e+06	5.8806e+06	4.76192e+06	4614362	6916716	6.42567e+06	1.52896e+07	1.1207e+07	8.04319e+06	5.55121e+06	8.65503e+06	7.96773e+06	8.66417e+06	7.17272e+06	1.4079e+06	9.33494e+06	9.05612e+06	5.33732e+06	1.2508e+07	10711148	6.89533e+06	8.73452e+06	1.96135e+07	1.47354e+07	1.01326e+07	8.18161e+06	6.53277e+06	3.49095e+06	1.30366e+07	8.77535e+06	7.9221e+06	7.90096e+06	1.22651e+07	6.1899e+06
AT1G29990.1	5.64087e+07	2.06119e+07	4.00661e+07	1.90801e+07	4.07372e+06	1.3795e+06	1.92639e+07	1.15435e+07	2.23303e+07	5.84729e+06	437267	6.30226e+06	1.0263e+06	1.03975e+06	2.6e+06	460162	5.16725e+06	441840	1.08831e+07	4.44881e+06	987141	943029	546240	415619	4.95518e+07	3.94283e+07	748970	1.11971e+07	3.11027e+07	1.83721e+07	1.70382e+07	1.29705e+07	1.11935e+06	1.30934e+06	5.42314e+06	614739	1550293	1.03464e+06	1.45035e+07	8507727	3.88891e+06	5.83585e+06	1.22598e+06	897639	12991131	1.18493e+07	3.12183e+07	1.41535e+07
AT1G30070.2	120151	109613	483908	365207	205795	279981	988639	939535	870879	973603	1.26756e+06	1.32347e+06	210891	304848	618942	127662	868829	1.00367e+06	641743	1.16815e+06	136087	135203	1.32636e+06	1.06219e+06	2.07833e+06	1.34966e+06	1.8886e+06	995848	2203146	1.51848e+06	2.25884e+06	1.81036e+06	2.68529e+06	1.51815e+06	512579	1.02176e+06	5.83417e+06	4.54051e+06	789038	635768	881088	272328	5.0209e+06	2.97193e+06	1.05984e+06	455412	555701	873669
AT1G30120.1	26404327	19758040	3.23564e+07	2.91847e+07	74877343	75221438	2.84997e+07	2.98324e+07	4.07408e+07	3.84465e+07	29023754	46279557	67168198	6.12741e+07	4.62466e+07	4.13118e+07	2.64458e+07	2.56767e+07	4.2351e+07	36222653	61149528	54538416	3.91641e+07	2.54882e+07	28754544	2.79221e+07	50075282	46896969	56842412	48620704	47140127	38785397	60212005	57827184	40553960	40975125	62358678	63205435	42765507	45581077	39685878	2.71938e+07	50255144	36816863	37486593	3.31247e+07	6.97324e+07	4.19986e+07
AT1G30230.2	1.78173e+09	1.10934e+09	1.19547e+09	9.87364e+08	2.34008e+09	2.17302e+09	1.68295e+09	1741632327	1.78306e+09	1.66447e+09	1.55684e+09	2.00881e+09	2.59643e+09	2.41216e+09	1.64569e+09	1.54163e+09	1.44579e+09	1.50175e+09	1.99048e+09	1.95555e+09	2.60615e+09	2.60216e+09	2.03034e+09	1.61883e+09	1.46483e+09	1.39457e+09	1.75025e+09	1.73564e+09	2.36238e+09	1.99038e+09	1.95331e+09	1.68246e+09	2.2714e+09	2.22357e+09	1.92632e+09	1.77233e+09	2.38755e+09	2.10107e+09	1.73133e+09	1.67733e+09	1.54501e+09	1.17913e+09	2.72858e+09	2.15387e+09	2.22451e+09	1.92964e+09	2.80023e+09	1.79563e+09
AT1G30360.1	2.86583e+08	1.53508e+08	2.25991e+08	1.22231e+08	1.76205e+08	1.85594e+08	1.28917e+08	1.36138e+08	1.66768e+08	1.37912e+08	1.16282e+08	1.17655e+08	2.76269e+08	2.593e+08	1.32519e+08	1.56133e+08	1.51112e+08	1.5219e+08	1.82885e+08	1.47131e+08	1.54407e+08	1.42693e+08	1.78165e+08	1.58424e+08	2.57167e+08	2.03408e+08	1.45637e+08	2.09709e+08	4.88464e+08	3.04431e+08	2.25575e+08	1.36347e+08	2.34572e+08	1.92155e+08	1.84562e+08	1.62325e+08	2.2814e+08	2.08407e+08	1.39152e+08	1.32698e+08	1.32485e+08	8.32927e+07	2.18464e+08	1.54005e+08	1.43578e+08	1.11167e+08	2.24352e+08	1.61308e+08
AT1G30380.1	8.09264e+08	3.90907e+08	4.96595e+08	2.98228e+08	3.40169e+07	27004674	2.43108e+08	2.56951e+08	2.95966e+08	2.58632e+08	1.38309e+08	1.49427e+08	3.92754e+08	373354534	193043883	285722684	1.72865e+08	2.0627e+08	2.63275e+08	260277535	62289984	2.94002e+07	310944234	303947713	4.58336e+08	421935517	24203438	4.00554e+08	531975865	3.63192e+08	254918612	24253549	27369526	29561150	14924398	1.61932e+07	39720980	33928976	19102244	18217520	61334935	40611226	30987646	2.20242e+07	32929382	27841688	210795184	2.72185e+08
AT1G30400.1	2.11705e+07	1.05668e+07	6.10266e+06	6.02609e+06	3.75637e+07	3.95006e+07	1.47977e+07	1.6784e+07	1.77989e+07	18885869	2.25344e+07	2.94822e+07	4.00494e+07	3.66793e+07	1.50897e+07	1.6563e+07	2.35296e+07	2.87749e+07	3.21672e+07	3.45529e+07	5.10198e+07	5.50783e+07	2.83148e+07	2.66412e+07	11728667	1.09029e+07	2.49907e+07	1.90055e+07	3.32788e+07	2.5324e+07	1.99341e+07	1.77012e+07	2.94856e+07	2.68459e+07	2.82419e+07	2.23325e+07	3.25108e+07	2.86525e+07	2.12929e+07	1.58858e+07	1.47203e+07	8.11248e+06	3.41055e+07	2.0823e+07	2.22626e+07	1.37782e+07	2.01325e+07	1.73262e+07
AT1G30470.1	3.7281e+07	1.73738e+06	2.85426e+07	1.22734e+07	1.45267e+07	1.46764e+07	2.07056e+07	2.94835e+07	2.89877e+07	6.49964e+06	1.18005e+07	1.09322e+07	5.38907e+07	2.79763e+06	1.15912e+07	8.24892e+06	8.48441e+06	7.55695e+06	4.12085e+07	2.5539e+07	5.93848e+07	5.533e+07	1.04716e+07	1.96003e+07	4.4421e+06	906533	9.89405e+06	3.84649e+07	7.83807e+06	2080880	1.23511e+07	1.17587e+07	1.08041e+07	1.19834e+07	4.03176e+07	3.89492e+07	6.40691e+07	1.14751e+07	1.2575e+07	4.17691e+07	1.70034e+07	1.03508e+07	1.11461e+07	4.77103e+07	9.45072e+06	3.58562e+07	7.30835e+07	3.58674e+07
AT1G30510.2	5.90397e+08	2.41481e+08	4.53525e+08	2.72567e+08	3.79377e+08	3.81287e+08	2.54763e+08	2.30121e+08	2.90189e+08	2.01013e+08	234354494	2.59631e+08	3.23776e+08	291601318	2.55751e+08	2.21344e+08	2.51558e+08	2.47485e+08	2.88305e+08	2.245e+08	3.19006e+08	3.30297e+08	286736999	2.34614e+08	377976304	3.66752e+08	2.96991e+08	2.35644e+08	2.68004e+08	2.39802e+08	2.9961e+08	2.76128e+08	3.08478e+08	2.97747e+08	2.9799e+08	2.78541e+08	3.65927e+08	3.63427e+08	2.98151e+08	2.65021e+08	2.78016e+08	2.03368e+08	3.31795e+08	2.49749e+08	2.64353e+08	2.02669e+08	4.32682e+08	2.80554e+08
AT1G30530.1	1.9952e+08	8.23392e+07	1.30783e+08	8.20637e+07	1.44102e+08	1.33435e+08	1.16808e+08	1.20494e+08	8.50831e+07	1.02578e+08	9.8903e+07	1.13453e+08	2.09212e+08	1.6437e+08	1.08783e+08	1.16462e+08	1.06069e+08	1.13688e+08	1.44593e+08	1.40866e+08	1.53056e+08	1.41615e+08	1.46912e+08	1.24771e+08	1.30622e+08	1.35542e+08	1.19014e+08	1.38146e+08	1.64958e+08	1.46752e+08	1.84925e+08	1.77707e+08	1.82252e+08	1.78646e+08	1.53826e+08	1.36816e+08	2.54253e+08	2.06429e+08	1.32907e+08	1.46669e+08	9.54613e+07	9.59488e+07	2.12476e+08	1.5339e+08	1.65134e+08	1.4842e+08	1.91416e+08	1.35381e+08
AT1G30580.1	1.2107e+09	5.15668e+08	7.87773e+08	5.27951e+08	9.48309e+08	8.98531e+08	6.39091e+08	6.57442e+08	7.30043e+08	6.8788e+08	7.27109e+08	8.31162e+08	1.10862e+09	9.46626e+08	7.72471e+08	7.53759e+08	6.80735e+08	6.50543e+08	7.68089e+08	7.3825e+08	9.34681e+08	8.83881e+08	9.4185e+08	7.25754e+08	6.20443e+08	5.50983e+08	7.2639e+08	6.93498e+08	1.04341e+09	8.11353e+08	7.67268e+08	6.70509e+08	8.95959e+08	8.13246e+08	8.47675e+08	7.39898e+08	1.08258e+09	9.07136e+08	7.56942e+08	7.17567e+08	7.52e+08	5.75026e+08	1.06374e+09	8.19285e+08	8.73668e+08	7.45543e+08	1.14865e+09	7.7693e+08
AT1G30630.1	3.1546e+07	1.65776e+07	1.07523e+07	7.57356e+06	3.1566e+07	2.95071e+07	2.14857e+07	2.21649e+07	2.00251e+07	1.77829e+07	2.16378e+07	2.53095e+07	3.47452e+07	3.12618e+07	1.89732e+07	1.71447e+07	1.94287e+07	1.92396e+07	2.14614e+07	2.35921e+07	3.13038e+07	2.92129e+07	2.24906e+07	2.04335e+07	1.7024e+07	1.29037e+07	2.42305e+07	1.94567e+07	2.67572e+07	2.06835e+07	2.31136e+07	2.34337e+07	3.22946e+07	2.75285e+07	3.25426e+07	2.70196e+07	32061358	2.51569e+07	2.60059e+07	2.07708e+07	1.75773e+07	1.08801e+07	3.51655e+07	2.37723e+07	2.91441e+07	2.07434e+07	3.23339e+07	2.26409e+07
AT1G30690.1	1.56953e+08	5.47444e+07	1.06781e+08	4.55869e+07	1.48969e+08	1.35852e+08	8.68227e+07	8.52391e+07	1.08256e+08	8.04282e+07	8.3909e+07	9.12765e+07	139227123	1.14236e+08	8.47018e+07	6.84106e+07	7.05381e+07	6.89122e+07	1.25876e+08	1.01073e+08	1.65639e+08	1.52195e+08	1.37266e+08	9.84522e+07	6.74286e+07	5.93305e+07	1.07965e+08	8.30646e+07	1.54039e+08	1.03623e+08	1.24804e+08	1.10629e+08	1.52636e+08	1.33312e+08	1.32343e+08	1.09033e+08	1.70146e+08	1.40883e+08	1.21976e+08	9.91691e+07	1.03597e+08	6.57698e+07	1.3754e+08	92863427	1.10393e+08	7.48766e+07	151638405	9.51298e+07
AT1G30910.1	2.82102e+07	9.15121e+06	13779326	9002593	17793420	18530822	14462521	12287547	12858116	12699699	14911998	14814398	15900792	15696260	16629349	12941475	14443851	11650239	15186659	11149208	15167089	17190718	11195444	12215966	15569348	1.41321e+07	2.17036e+07	1.63981e+07	1.54067e+07	1.15425e+07	1.96698e+07	18563054	2.17708e+07	2.12816e+07	23466941	2.22199e+07	3.37055e+07	2.7713e+07	2.4167e+07	1.92671e+07	2.10652e+07	16173091	2.83274e+07	24074597	2.36346e+07	16303886	2.08346e+07	13981005
AT1G31070.2	5.52116e+07	2.27954e+07	3.49385e+07	1.96259e+07	51753453	5.77165e+07	3.19171e+07	3.41629e+07	4.19225e+07	4.61564e+07	4.10094e+07	5.636e+07	6.8869e+07	4.8903e+07	4.21805e+07	4.20634e+07	3.91445e+07	4.31061e+07	5.85369e+07	5.82419e+07	6.30229e+07	7.40497e+07	6.89506e+07	44133051	2.77643e+07	2.44362e+07	46306209	4.60766e+07	5.28764e+07	3.15076e+07	5.1104e+07	3.29818e+07	66631502	5.66433e+07	3.9098e+07	2.62224e+07	6.43324e+07	5.9983e+07	4.59153e+07	4.52061e+07	3.39648e+07	3.19838e+07	7.22109e+07	4.6955e+07	5.16349e+07	2.69297e+07	6.55582e+07	3.95669e+07
AT1G31160.1	213185141	7.99512e+06	4.24932e+06	6.22104e+06	68608324	18059708	1.17345e+07	9701230	16244079	9.7633e+06	8290079	10224485	23655344	2.22278e+07	7843481	9008008	10126481	1.33819e+07	13023690	9011944	2.33102e+07	19306488	1.3772e+07	11570419	1.98747e+08	172497445	17765245	8.61297e+07	2.23185e+07	22972287	1.87564e+08	164939803	226170814	205207848	1.28994e+08	171116700	2.65123e+07	109259170	1.56745e+07	144348829	7.58866e+07	1.90099e+08	306089104	253390582	1.25253e+08	160899023	109809885	139767583
AT1G31180.2	3.56525e+07	1.99678e+07	2.42443e+07	2.09326e+07	7.3335e+07	7.52635e+07	2.70844e+07	3.26195e+07	3.41678e+07	3.34624e+07	3.23502e+07	4.15563e+07	7.47422e+07	6.05965e+07	3.59497e+07	3.32624e+07	3.40337e+07	3.22642e+07	4.72038e+07	4.15813e+07	5.88837e+07	5.72876e+07	4.02e+07	3.15129e+07	3.25582e+07	2.85718e+07	5.46893e+07	4.37453e+07	6.11709e+07	5.68983e+07	4.47303e+07	4.01608e+07	6.11668e+07	54314674	4.95827e+07	4.66507e+07	6.79458e+07	6.17304e+07	5.05631e+07	4.34344e+07	3.42118e+07	2.18033e+07	6.73665e+07	4.23339e+07	4.42142e+07	3.24398e+07	6.09059e+07	3.91474e+07
AT1G31190.1	2.13224e+08	7.94744e+07	1.28584e+08	7.85197e+07	1.86782e+08	1.70137e+08	1.01821e+08	1.01072e+08	1.10731e+08	1.0684e+08	1.04463e+08	1.2281e+08	1.74539e+08	1.61588e+08	1.26592e+08	1.06621e+08	1.22789e+08	110251875	126257615	1.0952e+08	1.46983e+08	1.55472e+08	1.15813e+08	94657239	1.21206e+08	1.09071e+08	1.59586e+08	1.30911e+08	1.43352e+08	1.11097e+08	1.44713e+08	1.31603e+08	1.5307e+08	1.52033e+08	1.20728e+08	1.1648e+08	1.61184e+08	1.62852e+08	1.4896e+08	1.37242e+08	1.414e+08	1.14718e+08	1.67118e+08	1.40708e+08	1.41015e+08	1.17142e+08	1.63728e+08	9.51094e+07
AT1G31230.1	4.4317e+08	1.73355e+08	3.52203e+08	1.77993e+08	2.31741e+08	2.41763e+08	1.53271e+08	1.8348e+08	2.04729e+08	1.63248e+08	1.58195e+08	2.01576e+08	2.95432e+08	2.44393e+08	1.87137e+08	1.9684e+08	1.58621e+08	1.86225e+08	1.5125e+08	1.83879e+08	2.03305e+08	2.04663e+08	2.23032e+08	1.79801e+08	2.9212e+08	2.48662e+08	2.42256e+08	2.11323e+08	2.76191e+08	2.14903e+08	2.23694e+08	2.04264e+08	2.54536e+08	2.42372e+08	2.29889e+08	2.17429e+08	3.77662e+08	3.24006e+08	2.67254e+08	2.21219e+08	1.94368e+08	1.56002e+08	3.01617e+08	1.82604e+08	2.28746e+08	1.78222e+08	2.87204e+08	1.94473e+08
AT1G31330.1	5.97365e+08	3.37012e+08	2.82504e+08	2.6691e+08	1.1144e+09	1.14324e+09	4.05094e+08	4.39636e+08	4.53584e+08	3.80007e+08	3.50107e+08	4.00934e+08	1.06182e+09	9.48077e+08	3.97135e+08	4.25306e+08	3.99584e+08	4.15015e+08	5.77798e+08	5.27988e+08	8.13819e+08	8.04418e+08	6.27431e+08	4.87739e+08	4.26176e+08	3.61626e+08	5.56063e+08	4.67029e+08	7.00212e+08	6.43387e+08	5.86815e+08	5.22814e+08	8.72508e+08	8.02834e+08	6.94636e+08	6.00149e+08	1.06657e+09	9.12723e+08	5.46407e+08	4.60198e+08	5.73305e+08	3.10077e+08	1.03579e+09	6.85389e+08	4.13393e+08	2.86818e+08	4.92164e+08	3.52683e+08
AT1G31340.1	4.49575e+07	1.6958e+07	5.11222e+07	2.13794e+07	1.05885e+07	6.32e+06	1.36161e+07	1.17559e+07	1.83498e+07	1.39121e+07	1.33039e+07	1.56065e+07	3.49473e+07	3.68798e+07	2.86084e+07	3.20391e+07	1.37796e+07	1.21119e+07	1.73426e+07	1.85875e+07	1.1815e+07	5.13697e+06	2.46404e+07	2.69043e+07	6.82421e+07	4.73943e+07	7.08072e+06	4.62703e+07	5.53935e+07	2.74978e+07	8.75285e+07	2.77931e+07	1.60595e+07	7.04708e+06	1.94611e+07	9.05399e+06	3.60128e+06	4976305	1.0164e+07	1.63624e+07	2.81545e+07	2.91584e+07	8.77781e+06	6.11677e+06	1.17757e+07	1.40231e+07	4.19441e+07	2.43962e+07
AT1G31660.1	7944986	4250987	3.50343e+06	2.87815e+06	20538954	22627674	5288810	6.25899e+06	6.56085e+06	7036792	8594454	10049560	19199072	18074196	8.33081e+06	9107925	9248289	10708379	11274501	13051187	22150678	22870714	10967152	9891551	8163780	7.636e+06	15382570	12164165	13140587	10193867	14513827	13221786	23067054	19638204	24036260	16198124	30897176	25901620	17927572	12649566	12756367	6.11134e+06	29704738	16031983	15341718	9203076	15786076	12684860
AT1G31730.1	1.70671e+08	1.05952e+08	9.39705e+07	5.86511e+07	1.19871e+08	1.07523e+08	1.01479e+08	9.38926e+07	1.24591e+08	4.86234e+07	8.49919e+07	8.76437e+07	164004903	1.18723e+08	7.74536e+07	9.74897e+07	3.17528e+07	8.63686e+07	9.99101e+07	8.95388e+07	9.63319e+07	9.62212e+07	8.48705e+07	7.48086e+07	1.03622e+08	1.24558e+08	1.12553e+08	124024548	1.52859e+08	1.39705e+08	6.83336e+07	6.21181e+07	92527311	8.67791e+07	1.13013e+08	1.06076e+08	6.96333e+07	9.36741e+07	9.20755e+07	9.64317e+07	7.33685e+07	4.43257e+07	100811192	7.77449e+07	4.76221e+07	5.56784e+07	137939154	9.66861e+07
AT1G31800.1	1.48811e+07	1.01385e+07	7.4981e+06	1.07108e+07	2.6852e+07	2.81652e+07	1.46391e+07	1.46541e+07	1.61913e+07	1.08417e+07	1.15681e+07	1.34383e+07	3.08367e+07	2.56631e+07	1.36064e+07	1.66996e+07	1.28412e+07	1.43079e+07	1.85609e+07	1.30286e+07	2.1689e+07	1.98424e+07	1.83011e+07	1.43362e+07	1.59796e+07	1.35361e+07	1.95151e+07	1.65166e+07	2.63708e+07	2.69783e+07	1.95291e+07	1.85757e+07	2.79321e+07	2.0633e+07	2.44033e+07	1.86025e+07	3.65292e+07	2.53905e+07	1.92376e+07	1.78764e+07	1.65564e+07	1.08343e+07	3.90164e+07	27639010	1.86575e+07	1.46309e+07	2.19606e+07	1.58454e+07
AT1G31812.1	1.89143e+09	6.34726e+08	1.35162e+09	6.90226e+08	8.16768e+08	7.27546e+08	8.23988e+08	8.09576e+08	9.83615e+08	9.2736e+08	8.57893e+08	8.80401e+08	1.08334e+09	1.00497e+09	7.54476e+08	7.99383e+08	7.27501e+08	7.1759e+08	9.27459e+08	9.34611e+08	9.80085e+08	7.787e+08	1.22647e+09	1.04611e+09	8.10247e+08	6.95651e+08	5.70648e+08	8.56091e+08	1.23261e+09	8.8239e+08	1.17914e+09	6.37988e+08	8.40507e+08	8.29768e+08	7.56101e+08	6.56167e+08	1.04598e+09	6.68526e+08	5.93023e+08	5.11232e+08	5.62176e+08	4.25324e+08	7.6883e+08	6.08101e+08	8.28141e+08	6.60181e+08	1.42784e+09	1.04485e+09
AT1G31817.1	9412760							2.04265e+06						1.38705e+06					1142301					2.3298e+06					2968589				1.38353e+06									1362186	1.50536e+06		912507		3884497
AT1G31860.1	4.45629e+07	1.40639e+07	2.81121e+07	1.13006e+07	2.67382e+07	2.33067e+07	1.92486e+07	1.92732e+07	1.96357e+07	1.53524e+07	2.3997e+07	2.37027e+07	2.07047e+07	2.90868e+07	1.74943e+07	1.59493e+07	2.69427e+07	2.24512e+07	2.3012e+07	2.10098e+07	4.13127e+07	3.76859e+07	2.96504e+07	2.14333e+07	1.30691e+07	1.6056e+07	1.88768e+07	1.18417e+07	3.19475e+07	3.07011e+07	1.53773e+07	1.56116e+07	2.47516e+07	2.46232e+07	2.48944e+07	2.48321e+07	3.96035e+07	2.23138e+07	2.02219e+07	1.47023e+07	1.96461e+07	1.07907e+07	2.68994e+07	2.06769e+07	2.00277e+07	2.10358e+07	3.68261e+07	2.18522e+07
AT1G31910.1	2.88426e+07	1.05926e+07	1.32119e+07	4.77722e+06	1.14959e+07	1.73385e+07	1.11196e+07	1.45371e+07	1.60802e+07	1.33938e+07	1.07885e+07	1.73968e+07	1.7777e+07	1.63498e+07	9.95654e+06	1.07791e+07	9.87009e+06	1.41871e+07	1.68275e+07	1.55849e+07	1.02404e+07	1.79297e+07	2.21672e+07	1.75011e+07	9.43955e+06	7.60187e+06	1.71622e+07	1.12831e+07	2.56787e+07	1.36745e+07	2.00765e+07	1.75288e+07	2.23088e+07	1.98916e+07	2.88395e+07	2.39692e+07	4.82504e+07	2.0092e+07	1.89776e+07	1.585e+07	2.0015e+07	1.92869e+07	2.23995e+07	1.72753e+07	2.23896e+07	1.54226e+07	3.14208e+07	2.05675e+07
AT1G31970.1	9.16453e+06	2.45544e+06	9.89181e+06	2.02163e+06	1.51466e+07	1.46377e+07	7.80207e+06	1.03326e+07	9.79785e+06	1.0757e+07	8.50995e+06	1.13968e+07	19634960	1.77237e+07	1.12686e+07	1.21411e+07	8.03252e+06	1.16099e+07	1.33612e+07	6.18903e+06	1.48209e+07	1.36127e+07	1.40246e+07	1.22348e+07	6.04348e+06	3.40307e+06	1.28402e+07	6.1804e+06	6633867	5788590	7.22027e+06	5.79971e+06	1.93316e+07	15839226	1.70763e+07	1.72609e+07	1.84609e+07	2.08487e+07	1.885e+07	1.49528e+07	10450271	2.28909e+06	25163694	1.36158e+07	1.27869e+07	1.04532e+07	1.54265e+07	10027880
AT1G32050.1	9511228	4.78434e+06	9274591	7.0337e+06	1.15341e+07	1.2072e+07	8540041	6.87686e+06	1.10771e+07	6.24798e+06	5654832	7.87337e+06	1.07536e+07	11339686	7259815	6.35151e+06	6.54082e+06	7.4912e+06	7.92339e+06	8.99124e+06	1.07568e+07	9.31255e+06	7.40678e+06	6.5798e+06	1.86621e+07	11465943	8.41156e+06	6.56215e+06	2.96312e+07	1.48437e+07	8.87656e+06	7812309	9.30922e+06	9.7452e+06	9.37953e+06	8.01333e+06	1.05637e+07	9.20751e+06	8.28928e+06	8.93466e+06	7811690	4.71934e+06	1.31046e+07	1.01744e+07	8369094	7.13063e+06	13943804	8.76094e+06
AT1G32060.1	7.81543e+09	2.74314e+09	5.47729e+09	3.48955e+09	4.94521e+09	4.57375e+09	3.19591e+09	3.12329e+09	3.44043e+09	3.18212e+09	3.10832e+09	3.31249e+09	5.41689e+09	4.95374e+09	3.8331e+09	3.34496e+09	3.94121e+09	3.53961e+09	3.88481e+09	3.413e+09	4.37215e+09	4.1311e+09	3.50091e+09	2.97635e+09	3.57526e+09	3.0588e+09	3.85195e+09	3.86291e+09	5.16788e+09	3.87216e+09	4.06869e+09	3.65296e+09	3.93634e+09	3.40062e+09	3.64789e+09	2.88189e+09	3.81927e+09	4.04877e+09	3.76659e+09	3.60189e+09	3.57309e+09	2.52401e+09	3.57787e+09	2.93443e+09	3.4223e+09	2.67689e+09	4.40857e+09	2.52894e+09
AT1G32080.1	5.31927e+07	1.07194e+07	3.82061e+07	1.40419e+07	1.19937e+07	1.33578e+07	9.79471e+06	7.95842e+06	1.02999e+07	1.00471e+07	1.10727e+07	9.60606e+06	1.1564e+07	7.44201e+06	1.17523e+07	1.03162e+07	1.56669e+07	1.26565e+07	1.54178e+07	8.61463e+06	8.67164e+06	8.12848e+06	1.52107e+07	1.28042e+07	1.23543e+07	1.10149e+07	1.25205e+07	9.23917e+06	1.60989e+07	8.3672e+06	1.17782e+07	9.71926e+06	1.13215e+07	9.85141e+06	1.18964e+07	9.1065e+06	2.29585e+07	1.48834e+07	1.54094e+07	1.16922e+07	1.5335e+07	1.19855e+07	1.65496e+07	1.09969e+07	1.10956e+07	9.32669e+06	1.75183e+07	6.9333e+06
AT1G32130.1	1.77968e+07	3.79799e+06	9.66609e+06	735834	9.22409e+06	7751306	5.9878e+06	7.00269e+06	9.13438e+06	8.5187e+06	5.83992e+06	565510	1.40804e+07	1.26735e+07	7.64286e+06	1.12702e+07	6.47364e+06	1.20645e+07	6.92224e+06	8.91971e+06	7394994	8.20698e+06	1.04104e+07	11201756	4.88451e+06	5.22877e+06	9.84394e+06	7.15788e+06	7.41064e+06	6.90706e+06	7.79941e+06	8.83202e+06	1.32377e+07	9.97342e+06	1.52592e+07	1.33291e+07	1.61854e+06	5343425	1.379e+07	1.09287e+07	8.20031e+06	1.2241e+07	1.60305e+07	1.00455e+07	1.18135e+07	8.98555e+06	9.06456e+06	7.64365e+06
AT1G32200.1	1.39912e+08	7.07496e+07	1.18894e+08	7.47412e+07	1.5636e+08	1.4379e+08	7.28239e+07	6.65469e+07	1.0093e+08	8.91003e+07	8.81532e+07	9.22865e+07	1.36136e+08	1.58564e+08	1.22156e+08	1.11e+08	8.10889e+07	7.91489e+07	1.00096e+08	1.06143e+08	1.08981e+08	1.16618e+08	1.04899e+08	9.03288e+07	8.94868e+07	9.2641e+07	1.22726e+08	9.10533e+07	1.06692e+08	1.15661e+08	1.31484e+08	9.00209e+07	1.23108e+08	9.21923e+07	9.32153e+07	8.03121e+07	1.56045e+08	1.35379e+08	1.13556e+08	9.90335e+07	1.62137e+08	1.12969e+08	9.42356e+07	9.91183e+07	8.3056e+07	7.40074e+07	1.67659e+08	1.03811e+08
AT1G32220.1	100115637	2.28151e+07	4.99969e+07	1.13188e+07	15232141	1.4124e+07	15794895	2.1383e+07	25891733	1.99343e+07	1.40392e+07	1.86326e+07	31946006	20767025	1.4035e+07	1.39102e+07	2.25018e+07	27590556	17571334	1.94426e+07	1.78614e+07	23905667	3.39725e+07	23190665	2.18941e+07	1.22097e+07	2.91885e+07	1.3342e+07	70163963	27721529	2.43808e+07	17342810	26838215	20290334	3.15759e+07	2.59185e+07	8883314	2.89348e+07	2.77346e+07	1.93476e+07	1.96092e+07	18539949	2.97936e+07	2.01588e+07	2.96299e+07	1.92257e+07	3.71679e+07	1.45137e+07
AT1G32400.2	2.00551e+06	861424	2.39601e+06	1.23455e+06	2.30453e+06	2.46786e+06	481377	1.41259e+06	2.85793e+06	1122047	2.32677e+06	2.99802e+06	4.43095e+06	2.42141e+06	1.11679e+06	1773431	3.61185e+06	2.77317e+06	1.50156e+06	3071033	3.19732e+06	3.38892e+06	3.73829e+06	4828334	2.12729e+06	2.6645e+06	2.06733e+06	3.40545e+06	7032412	2.39293e+06	6.24235e+06	1.67044e+06	2.98163e+06	3.67922e+06	2369418	2.66652e+06	5.96204e+06	3.57191e+06	2.13968e+06	1.84522e+06	3.58499e+06	2.97442e+06	3.10961e+06	3.1994e+06	2.68869e+06	3.62347e+06	6.75882e+06	2.22622e+06
AT1G32440.1	1.77839e+08	8.91528e+07	1.30229e+08	6.48971e+07	42848289	37347206	8.37557e+07	4.88822e+07	5.78962e+07	4.54904e+07	1.03573e+08	9.68367e+07	4.63118e+07	3.76859e+07	8.22105e+07	5.63113e+07	7.28564e+07	6.75129e+07	6.96626e+07	5.20001e+07	54200104	4.72245e+07	9.81784e+07	6.66015e+07	78560634	6.77256e+07	3.4305e+07	8.15521e+07	1.61227e+08	9.16424e+07	39332103	3.28367e+07	41776186	35798386	43050947	44488868	7.11418e+07	30905785	3.05986e+07	2.8136e+07	3.45187e+07	2.31764e+07	47498067	42262347	4.31234e+07	41945013	141022121	7.26812e+07
AT1G32470.1	187007082	106271116	157235435	1.15768e+08	3.37341e+08	327622028	140444411	1.53843e+08	1.68648e+08	1.61592e+08	1.71613e+08	1.90692e+08	2.89936e+08	2.64321e+08	193835185	151727084	1.67498e+08	1.63434e+08	192498496	177385278	2.67584e+08	244993235	1.84651e+08	154153889	139923737	1.1752e+08	2.17185e+08	1.87743e+08	2.50298e+08	2.04772e+08	2.08883e+08	1.74396e+08	2.33796e+08	2.1837e+08	1.85231e+08	1.93575e+08	289975570	257175924	1.98824e+08	1.74337e+08	166647785	1.06e+08	208654148	1.45172e+08	178302497	144821797	300870496	142445197
AT1G32500.1	2.46208e+08	1.23262e+08	2.35589e+08	9.56326e+07	61849690	5.34505e+07	9.32648e+07	9.0167e+07	1.12116e+08	1.03638e+08	7.2834e+07	7.89689e+07	1.72189e+08	1.50604e+08	1.03488e+08	1.14484e+08	8.6903e+07	8.53519e+07	1.01731e+08	105713254	8.39398e+07	5.83353e+07	1.24979e+08	1.2738e+08	1.54298e+08	1.02396e+08	4.08184e+07	1.15633e+08	3.20686e+08	1.39688e+08	1.44847e+08	4.17499e+07	5.7682e+07	4.13983e+07	4.443e+07	4.3103e+07	7.92332e+07	5.5428e+07	4.44229e+07	4.43873e+07	6.83974e+07	4.83472e+07	6.46837e+07	4.96638e+07	5.91936e+07	4.4467e+07	1.66832e+08	1.13867e+08
AT1G32550.2	6.56373e+07	1.60853e+07	34897160	15273674	28715757	26058896	2.11001e+07	1.91338e+07	2.024e+07	1.70999e+07	23221795	2.4684e+07	28702162	2.31873e+07	2.33866e+07	1.77692e+07	27156969	2.22855e+07	2.37536e+07	17473514	27708500	2.56826e+07	2.68846e+07	22350034	15865132	1.5793e+07	2.62823e+07	16346438	2.66633e+07	16088097	1.7978e+07	1.41421e+07	2.30751e+07	2.117e+07	18632364	1.6232e+07	40926226	25490693	25098197	20313824	16884842	1.24319e+07	2.55201e+07	2.51158e+07	2.57222e+07	2.14186e+07	2.82465e+07	1.15561e+07
AT1G32790.2	2.16785e+07	1.2388e+07	3.61513e+06	9336090	3.4628e+07	3.27081e+07	1.99394e+07	2.0183e+07	2.20588e+07	18142393	20687947	25930825	21833472	2.90082e+07	17884557	18321771	2.12057e+07	19142862	25042195	2.18871e+07	34191068	3.82593e+07	22419280	2.34056e+07	1.20626e+07	1.1617e+07	33579684	2.58055e+07	3.06671e+07	2.06613e+07	3.44406e+07	1.76462e+07	2.99053e+07	3.13668e+07	27089224	2.14293e+07	5.64792e+07	3.58024e+07	20772029	3.66973e+07	1.88514e+07	4.65216e+07	3.77553e+07	54757322	5.33732e+07	38133592	3.65027e+07	1.87353e+07
AT1G32990.1	4.73271e+08	2.20066e+08	2.87e+08	2.20236e+08	6.48685e+08	6.10069e+08	2.47566e+08	2.72104e+08	3.51247e+08	2.70668e+08	3.37699e+08	3.81009e+08	6.84602e+08	5.58177e+08	4.17522e+08	3.98513e+08	3.56642e+08	3.6137e+08	3.52804e+08	3.15926e+08	4.28784e+08	4.22585e+08	3.50246e+08	2.83317e+08	3.37636e+08	2.82326e+08	5.73084e+08	4.96448e+08	5.25431e+08	4.8373e+08	3.73914e+08	3.25887e+08	4.95654e+08	4.52888e+08	4.09229e+08	3.88069e+08	8.44076e+08	7.35125e+08	4.85e+08	4.38529e+08	3.73634e+08	2.39682e+08	5.90848e+08	4.34478e+08	4.46892e+08	3.64257e+08	5.44425e+08	2.85464e+08
AT1G33040.1	9.97374e+07	7.63265e+07	9.63808e+07	8.24191e+07	3.5499e+07	3.55149e+07	4.33691e+07	4.63206e+07	5.45363e+07	4.65156e+07	3.25105e+07	2.84172e+07	1.00323e+08	8.92151e+07	6.20424e+07	7.06462e+07	2.56011e+07	3.75662e+07	5.68732e+07	5.46417e+07	3.50541e+07	3.30966e+07	5.28014e+07	4.0299e+07	9.07073e+07	7.66123e+07	2.24204e+07	1.03213e+08	1.5265e+08	9.1649e+07	3.20977e+07	1.87914e+07	2.67153e+07	2.44461e+07	3.04515e+07	2.52049e+07	3.79454e+07	3.35218e+07	2.4869e+07	2.26763e+07	1.96456e+07	1.1438e+07	3.32797e+07	2.34493e+07	2.4957e+07	1.2127e+07	7.0785e+07	5.25481e+07
AT1G33140.1	1.22063e+09	7.46003e+08	1.14639e+09	9.46353e+08	1.66108e+09	1.67031e+09	8.29555e+08	9.13764e+08	1.07847e+09	9.2369e+08	9.68945e+08	1.12923e+09	1.64312e+09	1.51141e+09	1.08151e+09	9.80069e+08	8.65622e+08	8.88126e+08	1.18621e+09	1.04527e+09	1.47307e+09	1.45271e+09	1.17536e+09	9.02557e+08	9.19381e+08	8.121e+08	1.27945e+09	1.19016e+09	1.40541e+09	1.32824e+09	1.28726e+09	1.08717e+09	1.6344e+09	1.52544e+09	1.53018e+09	1.48424e+09	1.87916e+09	1.72938e+09	1.31404e+09	1.25052e+09	1.01852e+09	5.28198e+08	2.06653e+09	1.48714e+09	1.37296e+09	1.10508e+09	2.12872e+09	1.26138e+09
AT1G33590.2	1.55759e+09	1.08156e+09	1.317e+09	1.02674e+09	1.75388e+09	1.73238e+09	1.67734e+09	1.72645e+09	1.85175e+09	1.73944e+09	1.67609e+09	2079002042	2.18799e+09	2.04396e+09	1.50531e+09	1.36854e+09	1.53191e+09	1.43087e+09	1.99172e+09	1.89568e+09	2.33053e+09	2.28618e+09	1.8544e+09	1.64074e+09	1.15759e+09	1.1436e+09	1.56189e+09	1.45862e+09	2.54213e+09	2.12675e+09	1.37632e+09	1.17625e+09	2.11977e+09	2.03e+09	1.54722e+09	1.51076e+09	2.0157e+09	1.76045e+09	1.46717e+09	1.38435e+09	9.15147e+08	7.65338e+08	2.34339e+09	2.00585e+09	1.99028e+09	1.86897e+09	2.08974e+09	1.41698e+09
AT1G33780.1	1.22661e+07	3.95187e+06	9166947	5.81668e+06	13234891	1.54654e+07	6.13664e+06	5.91141e+06	8.54471e+06	8.62041e+06	8.11822e+06	9.60347e+06	8.44607e+06	1.15828e+07	1.08355e+07	7.85129e+06	6.90273e+06	5.21621e+06	1.00974e+07	5.9067e+06	9.71102e+06	10824822	7.34998e+06	2.06742e+06	8.1317e+06	4.62319e+06	1.17784e+07	1.8105e+07	16182916	1.18919e+07	12517385	7993658	11346902	1.2024e+07	9.28278e+06	7954308	18323603	1.62931e+07	11474364	1.09241e+07	11010044	8373016	1.48728e+07	1.05504e+07	9.48085e+06	7.19652e+06	1.40987e+07	6.90716e+06
AT1G33810.1	1.67829e+07	1.79262e+07	1.12834e+07	1.26342e+07	6.67129e+07	6.57185e+07	2.76603e+07	2.89356e+07	3.17773e+07	2.98355e+07	2.65382e+07	32177186	6.14079e+07	5.91316e+07	3.29922e+07	2.61884e+07	35612109	2.63545e+07	33338664	3.28649e+07	5.21711e+07	4.84523e+07	3.39551e+07	2.18661e+07	3.16105e+07	2.93059e+07	4.02986e+07	4.36409e+07	4.23152e+07	4.70444e+07	4.23677e+07	3.25744e+07	5.14144e+07	5.38013e+07	2.53511e+07	2.36334e+07	6.33698e+07	6.21183e+07	3.27712e+07	4.03582e+07	3.54344e+07	2.33595e+07	6.77946e+07	5.50001e+07	3.50275e+07	3.42222e+07	5.29183e+07	2.59521e+07
AT1G33811.1	246161	313148	315807	332342	801822	772485	424989	471163	424737	475022	588631	643403	266874	190919	605951	551266	278840	235900	445044	459746	858290	806210	690567	666544	707874	681284	916769	862133	435112	495275	976431	1.02992e+06	915710	1083821	1.03647e+06	971481	1.19975e+06	1.17363e+06	1.10337e+06	926131	796962	597467	1.7448e+06	1.27256e+06	1.09551e+06	895016	917297	846654
AT1G34030.1	1.18484e+09	5.80661e+08	3.84127e+08	3.46589e+08	1.43527e+09	1.46067e+09	7.96684e+08	8.88116e+08	6.88639e+08	5.35043e+08	7.01424e+08	8.07899e+08	1.80301e+09	1.36155e+09	8.6944e+08	1.04927e+09	7.89687e+08	7.98372e+08	1.06225e+09	9.26966e+08	1.1191e+09	1.12427e+09	9.00416e+08	7.52811e+08	8.52376e+08	7.56371e+08	1.31775e+09	1.16649e+09	1.23703e+09	1.24949e+09	1.08721e+09	1.01151e+09	1.52069e+09	1.38504e+09	1.77452e+09	1.54674e+09	2.30163e+09	1.96554e+09	1.41931e+09	1.22825e+09	9.6431e+08	5.56692e+08	2.03923e+09	1.4074e+09	1.26356e+09	9.14405e+08	1.35734e+09	1.036e+09
AT1G34130.1	1.10694e+07	4.23161e+06	5.15399e+06	1.53874e+06	5647197	7.8221e+06	5.61173e+06	6.18959e+06	6387687	5.2039e+06	5938368	6.85748e+06	1.00513e+07	9.1091e+06	4.19541e+06	3.95189e+06	5733080	7372734	7.7652e+06	6.7579e+06	1.04158e+07	10429460	9088192	6.60451e+06	6.63454e+06	5.53466e+06	4112384	6438910	1.25785e+07	9.86831e+06	7199069	6.99014e+06	1.23479e+07	1.08127e+07	8.31052e+06	7.49774e+06	7.77241e+06	1.02252e+07	7.95691e+06	3.95313e+06	4.2709e+06	3.2088e+06	1.44962e+07	1.1522e+07	10175699	7462967	1.056e+07	5.5029e+06
AT1G34430.1	3.4613e+08	1.29442e+08	2.84255e+08	1.92005e+08	1.00953e+08	8.77632e+07	1.15909e+08	7.9311e+07	8.79269e+07	6.14914e+07	5.64737e+07	6.87505e+07	1.37774e+08	1.01482e+08	6.87613e+07	7.52022e+07	6.06229e+07	6.48782e+07	8.3839e+07	7.78587e+07	9.34703e+07	7.96647e+07	7.30818e+07	4.66665e+07	1.97052e+08	2.04015e+08	6.17895e+07	8.01248e+07	8.5123e+07	9.41493e+07	7.21768e+07	6.88207e+07	7.62043e+07	7.00843e+07	7.17249e+07	6.46584e+07	1.01784e+08	8.70211e+07	6.79628e+07	6.73469e+07	6.28582e+07	5.08821e+07	8.08101e+07	5.63961e+07	5.83267e+07	4.76372e+07	8.18251e+07	6.10432e+07
AT1G34760.1	1.65837e+06	70709.8	2.72892e+06	571685				28920.7	6.29638e+06	43403.1		11779106	149810		3.72307e+06	65025.2			220555	29019.1			10352382	10203230	1.0815e+06	1.00602e+06			4.31933e+06	552277		20260							4.87012e+06							8740004	1.48733e+06	4.28382e+06
AT1G35160.2	4.41502e+08	1.99535e+08	3.70727e+08	2.24932e+08	6.09934e+08	5.69779e+08	3.18729e+08	3.3456e+08	3.7814e+08	3.63058e+08	3.57559e+08	4.29058e+08	5.45568e+08	5.04591e+08	4.23594e+08	3.43824e+08	3.27438e+08	2.9894e+08	4.2998e+08	3.85625e+08	5.53585e+08	5.41617e+08	4.34426e+08	2.93904e+08	3.29992e+08	2.95851e+08	4.96389e+08	4.32202e+08	5.08125e+08	4.02602e+08	5.06846e+08	4.0701e+08	5.63767e+08	5.37292e+08	3.75726e+08	3.6421e+08	7.21839e+08	6.12508e+08	4.56195e+08	4.16219e+08	4.1739e+08	2.95727e+08	5.54494e+08	4.32491e+08	4.70826e+08	4.08701e+08	6.33717e+08	3.21423e+08
AT1G35340.1	4.72165e+07	1.22353e+07	2.34381e+07	8.71504e+06	1.55698e+07	1.32941e+07	1.03546e+07	1.56022e+07	1.53969e+07	1.27904e+07	1.19104e+07	1.79502e+07	2.12636e+07	20596975	1.54959e+07	1.67014e+07	1.53827e+07	1.64737e+07	1.36192e+07	1.17575e+07	9.05976e+06	1.38783e+07	1.99164e+07	1.51331e+07	1.67674e+07	1.12537e+07	19855984	1.42669e+07	1.97095e+07	1.1642e+07	1.66235e+07	1.80775e+07	2.42278e+07	1.84733e+07	2.38321e+07	2.11447e+07	7092116	1.45503e+07	2.67437e+07	2.04547e+07	1.9241e+07	1.81475e+07	2.5605e+07	2.35301e+07	2.49815e+07	18243345	2.43097e+07	1.2996e+07
AT1G35580.1	1.06408e+08	5.72796e+07	8.61451e+07	5.82581e+07	2.04177e+08	2.37419e+08	1.21741e+08	1.27351e+08	1.4259e+08	1.28228e+08	1.52495e+08	1.83659e+08	2.24469e+08	1.89805e+08	1.44063e+08	1.30356e+08	1.1684e+08	1.06386e+08	1.72102e+08	1.57135e+08	2.51102e+08	2.24031e+08	1.5694e+08	1.15376e+08	1.07182e+08	9.56339e+07	1.56462e+08	1.38532e+08	1.62928e+08	1.45074e+08	1.72119e+08	1.42454e+08	2.44672e+08	2.15871e+08	1.36898e+08	1.42432e+08	2.52723e+08	2.43485e+08	1.53614e+08	1.50528e+08	1.3624e+08	9.42168e+07	2.8153e+08	2.10137e+08	1.92778e+08	1.58959e+08	2.48842e+08	1.28245e+08
AT1G35620.1	1.35981e+07	698738	865156	958568	3.24616e+06	3.07058e+06	2.49409e+06	2.78848e+06	2.02826e+06	2.20581e+06	2.21248e+06	2.79248e+06	2.49452e+06	2.44447e+06	2.47609e+07	2.21632e+06	1.84081e+06	1.77406e+06	2.9677e+06	4.03054e+06	3.87781e+06	3.85838e+06	3.13564e+06	2.77482e+06	2.63088e+06	2292523	3.44955e+06	2.4937e+06	2.55442e+06	1.94039e+06	5.4498e+06	4.99035e+06	8.21039e+06	7118197	7.81865e+06	6.12526e+06	10666825	8.01288e+06	4.30054e+06	3.1186e+06	3.00788e+06	1.48935e+06	1.00244e+07	3.0776e+07	5.90621e+06	3.60609e+06	3.86672e+06	3.2721e+06
AT1G35670.1	5.24573e+07	1.36639e+07	3.58485e+07	1.79597e+07	44071400	3.59557e+07	30647357	2.7977e+07	30729999	3.11123e+07	3.4571e+07	4.98119e+07	3.26698e+07	3.23176e+07	3.52529e+07	2.51682e+07	43880472	2.87836e+07	3.52987e+07	29447317	4.61414e+07	42702450	5.26246e+07	27434348	1.7498e+07	1.41196e+07	12486857	1.01831e+07	19990168	1.68705e+07	2.88572e+07	3.09869e+07	38431174	3.99676e+07	41142451	39533406	2228202	4.06139e+07	3.18513e+07	1.14216e+07	3.87115e+07	9.90495e+06	4.6582e+07	1.73775e+07	3.95579e+07	1.39157e+07	4.55519e+07	2.13449e+07
AT1G35680.1	4.75838e+08	2.29123e+08	3.62295e+08	2.27918e+08	6.63504e+08	6.52707e+08	3.19354e+08	3.23017e+08	3.87964e+08	345204357	3.75937e+08	4.15833e+08	6.12813e+08	569494555	4.40634e+08	3.6544e+08	3.45572e+08	3.30704e+08	4.10533e+08	3.65207e+08	5.97983e+08	6.0484e+08	4.15884e+08	2.78597e+08	3.31566e+08	299585453	499594010	4.36868e+08	488030624	427883209	4.43978e+08	3.30615e+08	511032324	5.11085e+08	2.99145e+08	3.08299e+08	662649470	6.19027e+08	3.94412e+08	3.96791e+08	3.98528e+08	2.74777e+08	6.01441e+08	4.52213e+08	4.10513e+08	3.60325e+08	5.63393e+08	3.03795e+08
AT1G35720.1	2.01637e+09	7.92757e+08	1.51897e+09	9.082e+08	8.0269e+08	7.68063e+08	9.58883e+08	8.30857e+08	9.6551e+08	6.32743e+08	7.46157e+08	7.42982e+08	9.35783e+08	7.65885e+08	6.45485e+08	6.27067e+08	5.13626e+08	5.39823e+08	1.02997e+09	8.63609e+08	8.48448e+08	7.693e+08	9.6809e+08	7.30533e+08	1.2514e+09	1.01548e+09	5.73937e+08	8.03246e+08	1.39981e+09	9.76636e+08	8.12585e+08	6.05279e+08	8.44266e+08	8.04898e+08	7.04291e+08	6.57396e+08	9.46339e+08	7.13111e+08	6.93189e+08	5.49266e+08	5.30947e+08	3.28521e+08	8.13734e+08	5.99687e+08	5.8425e+08	4.82212e+08	1.49394e+09	9.47756e+08
AT1G36050.1	3444279	1.26732e+06	3.71319e+06	2.68568e+06	6.26267e+06	3.30107e+06	3.98332e+06	3.25015e+06	5.01197e+06	12579502	9506337	1.19257e+07	1.10367e+07	1.5354e+07	4.20434e+06	1.74198e+06	8.42214e+06	6643809	3403489	1.19489e+07	8.12198e+06	4.4501e+06	1.87225e+07	17189473	2.40835e+06	2.08779e+06	5.61539e+06	1.09571e+07	6.29213e+06	2654821	2.12121e+07	5.20359e+06	9.07392e+06	6.90468e+06	6.27914e+06	5.77971e+06	2.98504e+06	5.67759e+06	5.8659e+06	4.93828e+06	5.22595e+06	6.48934e+06	7.99138e+06	6.17873e+06	5.68705e+06	8.48769e+06	9.8257e+06	4.06833e+06
AT1G36160.2	4.40868e+08	1.79688e+08	3.62388e+08	1.88128e+08	2.45029e+08	2.41937e+08	2.04376e+08	2.0882e+08	2.5458e+08	2.20145e+08	2.05029e+08	2.56755e+08	3.19532e+08	2.62335e+08	2.23043e+08	2.51825e+08	1.73355e+08	1.89882e+08	2.57165e+08	2.54481e+08	3.14273e+08	2.86731e+08	3.23352e+08	2.78031e+08	3.04478e+08	2.5521e+08	2.16204e+08	2.36856e+08	4.30154e+08	2.92249e+08	4.0127e+08	2.92284e+08	3.33958e+08	3.0628e+08	3.56414e+08	2.8271e+08	3.54898e+08	2.85624e+08	2.34432e+08	2.29779e+08	2.35202e+08	1.96776e+08	3.09897e+08	2.2637e+08	3.07492e+08	2.50259e+08	4.56861e+08	3.03876e+08
AT1G36280.1	4.27584e+06	2.07941e+06	697507	817966	9774676	9.18806e+06		2.00624e+06	5.00209e+06	2.5963e+06	2.94842e+06	3.41894e+06	5399192	3.51151e+06	3.56567e+06	4.11994e+06	4.16287e+06	4.48335e+06	2.25936e+06	4.97653e+06	6.07498e+06	4.3782e+06	4.59908e+06	3.52303e+06	2185492	2.29106e+06	6743845	3179174	6.73284e+06	5.22338e+06	6.47336e+06	6.49042e+06	7.37862e+06	8706450	6.97534e+06	7.12763e+06	1.26774e+07	8.83525e+06	7510999	6.19562e+06	5.16661e+06	2.80918e+06	10703092	6.16993e+06	3.57162e+06	2139648	7.21636e+06	1.85882e+06
AT1G36390.2	1.83191e+08	5.18729e+07	8.66247e+07	6.6946e+07	86716616	1.35432e+08	7.62867e+07	9.24328e+07	8.13509e+07	8.12442e+07	7.23258e+07	1.05129e+08	2.30763e+08	1.18115e+08	1.03018e+08	96752516	7.62199e+07	8.2194e+07	106615724	101646229	9.5442e+07	1.56664e+08	9.53484e+07	8.3347e+07	1.07394e+08	1.04726e+08	6.67696e+07	1.34218e+08	108205028	9.64198e+07	1.14389e+08	9.58778e+07	8.20927e+07	7.8198e+07	9.36001e+07	9.23226e+07	9.98677e+07	1.05282e+08	6.47533e+07	1.02386e+08	7.29976e+07	1.34568e+08	1.75145e+08	6.10569e+07	9.19736e+07	9.53767e+07	2.0583e+08	166465495
AT1G36730.1	2.44314e+07	1.82063e+07	2.3014e+07	2.11622e+07	2.03918e+07	2.13008e+07	2.16811e+07	2.66257e+07	3.10379e+07	2.56615e+07	1.94865e+07	2.81359e+07	5.15722e+07	4.11796e+07	2.14143e+07	3.02784e+07	1.99754e+07	2.11968e+07	2.90439e+07	3.19173e+07	2.45081e+07	2.13425e+07	3.66793e+07	2.78625e+07	3.80739e+07	3.20219e+07	2.41881e+07	4.87574e+07	4.20425e+07	37831013	4.40256e+07	2.58675e+07	2.64234e+07	2.51178e+07	2.29712e+07	2.23672e+07	2.35858e+07	3.35831e+07	2.29985e+07	3.29193e+07	1.27702e+07	6.49571e+06	3.40752e+07	2.7266e+07	2.82926e+07	3.44493e+07	4.87574e+07	3.75115e+07
AT1G37130.1	3.18825e+08	1.80627e+08	3.85918e+08	2.66898e+08	3.09573e+08	3.94045e+08	3.16856e+08	3.43309e+08	3.99632e+08	3.85421e+08	2.2665e+08	2.92195e+08	3.74644e+08	4.13462e+08	3.9425e+08	3.93071e+08	1.58906e+08	2.15658e+08	3.96084e+08	3.31836e+08	3.53466e+08	3.32991e+08	3.48181e+08	2.42057e+08	275557275	2.46244e+08	2.21708e+08	3.8416e+08	4.55237e+08	3.83182e+08	2.93188e+08	2.16243e+08	2.25715e+08	2.08369e+08	2.40881e+08	2.08454e+08	2.69605e+08	3.00983e+08	226121856	2.2081e+08	2.33965e+08	1.84705e+08	2.69463e+08	201307440	2.52056e+08	2.56869e+08	500179495	3.85929e+08
AT1G41830.1	2.97109e+06	2.59959e+06	4107543	4.0752e+06	10995600	9914695	2.8486e+06	3430861	4.63063e+06	4541752	5627679	6.12251e+06	7954560	7.12574e+06	6.61172e+06	4488322	3.50702e+06	3.86227e+06	6.4493e+06	5095454	7.08503e+06	6716634	5.04739e+06		4938397	4709326	8.35655e+06	8371490	7428267	6637648	7.16839e+06	5722662	8586698	8149817	6286422	5.61206e+06	10163170	8794564	6.76956e+06	6489998	7092012	5.03496e+06	6.04182e+06	5449373	1.09412e+07	5.86966e+06	7997131	5.04753e+06
AT1G41880.2	5.49168e+08	5.59713e+08	682170720	450182985	1.81128e+08	1.77746e+08	4.12735e+08	3.50658e+08	4.36341e+08	2.31676e+08	1.61189e+08	1.60591e+08	3.83782e+08	2.16777e+08	2.18716e+08	3.02643e+08	1.74886e+08	2.59793e+08	3.35477e+08	2.5816e+08	2.06976e+08	1.91781e+08	3.22203e+08	1.53715e+08	759272288	730768844	1.56185e+08	3.38881e+08	6.56955e+08	837194624	1.35392e+08	1.06266e+08	1.72587e+08	1.50474e+08	1.53065e+08	1.407e+08	2.11214e+08	2.03816e+08	1.16752e+08	1.19316e+08	1.14247e+08	6.40016e+07	2.27643e+08	1.47195e+08	1.41707e+08	1.15813e+08	4.4394e+08	4.4097e+08
AT1G42480.1	1.89629e+07	1.11027e+07	1.55809e+07	5.93665e+06	1.25559e+07	10895196	7841942	1.23746e+07	1.80304e+07	1.70214e+07	1.40317e+07	1.08392e+07	18693738	15509019	1.03252e+07	16885120	8.83113e+06	8559147	1.07203e+07	15752648	1.01897e+07	8.46865e+06	2.60135e+07	2.3099e+07	1.03315e+07	6.80392e+06	2962242	9.30203e+06	1.34236e+07	8.44424e+06	17928437	1.4697e+07	12724083	5007568	1.37787e+07	4.27865e+06	7009803	4372673	2671263	1.19031e+07	8072138	1.50914e+07	6408395	3.30794e+06	1.28409e+07	1.43129e+07	1.33262e+07	1.16302e+07
AT1G42550.1	3.38474e+07	1.17372e+07	2.92752e+07	1.02656e+07	2.79634e+07	24743216	1.77809e+07	1.36368e+07	1.95899e+07	1.45207e+07	1.96863e+07	2.21648e+07	19613251	1.7745e+07	2.30827e+07	1.83373e+07	1.89735e+07	1.54379e+07	1.84778e+07	18295910	1.88329e+07	18173009	2.2104e+07	1.96778e+07	14442466	1.42334e+07	2.18207e+07	1.57193e+07	1.99377e+07	1.31064e+07	1.87045e+07	1.74855e+07	1.51586e+07	1.83852e+07	2.32591e+07	1.95994e+07	40392272	22008820	1.94799e+07	1.66417e+07	1.64562e+07	1.17736e+07	2.59375e+07	2.27626e+07	25295198	1.96509e+07	2.78848e+07	1.58432e+07
AT1G42960.1	1.0323e+08	5.83368e+07	6.51253e+07	4.11265e+07	6.53835e+07	6.57079e+07	5.64902e+07	5.41647e+07	5.65224e+07	4.59562e+07	4.94449e+07	4.70117e+07	8.20124e+07	7.08498e+07	6.27664e+07	6.27739e+07	4.98983e+07	7.06869e+07	5.752e+07	6.8164e+07	65791317	6.0563e+07	6.33203e+07	4.81935e+07	7.18508e+07	6.85823e+07	4.05825e+07	6.82026e+07	46538886	7.61111e+07	4.5464e+07	3.35472e+07	6.69252e+07	4.36818e+07	4.01682e+07	4.12514e+07	4.36363e+07	3.35758e+07	37641223	3.89726e+07	5.42434e+07	3.92807e+07	45525215	3.9046e+07	37554671	3.12954e+07	6.53753e+07	5.51734e+07
AT1G42970.1	1.88423e+10	9.54252e+09	1.48907e+10	1.0084e+10	1.61613e+10	1.45729e+10	1.0251e+10	1.11754e+10	1.24027e+10	1.17113e+10	9.44549e+09	1.24458e+10	1.95794e+10	1.83831e+10	1.2289e+10	1.23775e+10	1.05544e+10	1.14892e+10	1.30586e+10	1.32677e+10	1.52215e+10	1.50269e+10	1.53861e+10	1.13715e+10	1.35903e+10	1.31776e+10	1.33039e+10	1.66837e+10	2.04657e+10	1.74226e+10	1.66195e+10	1.41193e+10	1.42895e+10	1.27059e+10	9.92201e+09	9.54109e+09	1.8862e+10	1.63154e+10	1.20083e+10	1.43256e+10	1.2101e+10	1.10463e+10	1.48883e+10	1.15826e+10	1.36665e+10	1.38683e+10	1.78562e+10	1.18959e+10
AT1G43170.5	6.83831e+09	3.2382e+09	4.63826e+09	2.92359e+09	6.35159e+09	5.83167e+09	4.15167e+09	4.23321e+09	4.81752e+09	4.6271e+09	4.62887e+09	5.2969e+09	7.20971e+09	6.57928e+09	4.95255e+09	4.5145e+09	4.49725e+09	4.50181e+09	5.45168e+09	5.34441e+09	6.63231e+09	6.64053e+09	6.20718e+09	5.00686e+09	4.10375e+09	3.94524e+09	4.90193e+09	4.57255e+09	7.41907e+09	5.34648e+09	5.38364e+09	4.78265e+09	6.71028e+09	5.97395e+09	6.19301e+09	5.40161e+09	4.62385e+09	4.54124e+09	4.99644e+09	4.91394e+09	4.78355e+09	3.70333e+09	7.72578e+09	6.01037e+09	5.95681e+09	5.01504e+09	7.83506e+09	4.9659e+09
AT1G43190.2	36861600	9.77427e+06	52566350	2.25445e+07	3.74275e+06	3.34969e+06	6.99786e+06	3.71132e+06	5.22428e+06	4.59185e+06	5052907	4833302	5.35112e+06	3.46696e+06	6598660	7.62018e+06	5.7774e+06	4.35139e+06	4.58763e+06	2.58389e+06	2.08956e+06	1.89354e+06	6.61179e+06	6.68599e+06	1.64968e+07	1.28847e+07	4.54225e+06	6.10036e+06	7.29238e+06	3068079	3224632	3.20769e+06	4587968	4.42679e+06	3.12327e+06	2547364	5.93297e+06	3879768	5.31718e+06	3799297	4.34756e+06	1.91218e+06	2.05145e+06	2.29226e+06	1840012		5.82852e+06	4.15811e+06
AT1G43560.1	415844456	1.09342e+08	2.13803e+08	1.00128e+08	1.57875e+08	1.8624e+08	1.21528e+08	1.16291e+08	1.35124e+08	128279748	1.42609e+08	1.36696e+08	2.16655e+08	1.8993e+08	177388710	1.45651e+08	1.69384e+08	1.51755e+08	1.24259e+08	9.32961e+07	125780764	1.42174e+08	1.59359e+08	1.10027e+08	1.03928e+08	8.51142e+07	1.51559e+08	1.13114e+08	1.75387e+08	1.04275e+08	1.3214e+08	1.23116e+08	1.36226e+08	128078496	1.38809e+08	1.2368e+08	1.5861e+08	2.04718e+08	1.58037e+08	1.20159e+08	171245658	1.25894e+08	1.50375e+08	1.29528e+08	138545009	1.091e+08	1.57567e+08	93719976
AT1G43670.1	1.44795e+09	5.20149e+08	8.17954e+08	4.86064e+08	9.30233e+08	8.85155e+08	7.19138e+08	6.88789e+08	7.41715e+08	7.21017e+08	6.92796e+08	7.2274e+08	8.99446e+08	8.78238e+08	8.1457e+08	6.79916e+08	7.90548e+08	7.06069e+08	8.39982e+08	7.17777e+08	1.00976e+09	8.80399e+08	8.05621e+08	6.86737e+08	7.17218e+08	6.80307e+08	8.33706e+08	7.78868e+08	9.43028e+08	6.62847e+08	1.05419e+09	9.63253e+08	1.00161e+09	9.63408e+08	9.43518e+08	8.65583e+08	1.32251e+09	1.05731e+09	8.95868e+08	7.49598e+08	9.68958e+08	7.10804e+08	9.98298e+08	9.54069e+08	1.01473e+09	8.3386e+08	1.09021e+09	7.50565e+08
AT1G43690.1	7.80883e+06	1.04594e+06	1.4082e+06	664216	849509	1.38083e+06	1.56248e+06	1.53365e+06	1.87812e+06	2.9248e+06	3.6307e+06	2.09585e+06	1.62347e+06	2.99797e+06	2.42799e+06	3.11441e+06	1.50484e+06	1.37706e+06	1.86881e+06	1.43387e+06	969121	2.92213e+06	2.48486e+06	2.14301e+06	1.70341e+06	1.33481e+06	899649	229636	2.27998e+06	677248	1.95085e+06	1.01873e+06	2.89873e+06	1838809	1.37911e+06	2.57083e+06	2.74713e+06	1.75938e+06	1.43571e+06	1.62954e+06	1187759	1.18044e+06	4.18749e+06	1.48829e+06	1.86894e+06	1.83693e+06	5.17467e+06	2.05476e+06
AT1G43710.1	49826964	1.43347e+07	4.1783e+07	2.02164e+07	3.32659e+07	3.15637e+07	2.19374e+07	1.88021e+07	22615717	24827689	30203008	2.77973e+07	31251323	28424050	28298824	2.47689e+07	2.21297e+07	2.12803e+07	23761857	18463342	3.02097e+07	25413521	26373497	2.12823e+07	1.31785e+07	1.33806e+07	23744371	1.92521e+07	17237918	1.07502e+07	2.8069e+07	26635701	2.80318e+07	3.00237e+07	3.26589e+07	3.43232e+07	47089115	37001641	3.88247e+07	25652754	3.07487e+07	2.24495e+07	36902751	3.51613e+07	2.84832e+07	1.94612e+07	32767183	2.15731e+07
AT1G43800.1	8.21548e+06	1.75516e+06	2.14089e+06	1.19018e+06	6.86589e+06	5.2681e+06	4.60217e+06	4788480	5.10308e+06	3.7393e+06	8.77353e+06	1.02789e+07	2.23817e+06	3082175	6.8919e+06	5.08971e+06	3.68491e+06	1.51145e+06	6.06826e+06	4.72677e+06	3.63194e+06	3.88601e+06	4.8168e+06	4342953	4.24067e+06	4.54484e+06	5119402	4.44811e+06	3.27295e+06	2.65144e+06	1.33081e+06	4.64386e+06	2780934	2.78251e+06	8.59906e+06	1.2778e+07	1.53191e+06	7.29771e+06	7.61824e+06	9.73845e+06	1.03565e+07	5.31963e+06	7.26277e+06	7.30181e+06	7.39103e+06	6059174	1.70691e+07	1.11799e+07
AT1G43890.3	2.93435e+06	244351		193550	9.88603e+06	9.1293e+06	5.86133e+06	5.46458e+06	5.72704e+06	6.22724e+06	586194	721779	5.41077e+06	7166637	451425	3.57706e+06	393855	4.24067e+06	7.96719e+06	546559	1.10614e+07	1.07812e+07	855407	5.68576e+06	4.98878e+06	3.95392e+06	5.64162e+06	5.74157e+06	6.92246e+06	4.87629e+06	8.30339e+06	6.35681e+06	9.76827e+06	9066814	6.87416e+06	5.92742e+06	8.55455e+06	7.28045e+06	6.08872e+06	5.12565e+06	4.2777e+06	2.1576e+06	1.12476e+07	8.57195e+06	7264734	6.32973e+06	8.72043e+06	4.59221e+06
AT1G44170.1	444456	663340	1.73403e+06	1.65182e+06	4.83179e+06	4.59657e+06	2.30707e+06	1.827e+06	3639167	3.89281e+06	3287710	5.3888e+06	3.59366e+06	3.98789e+06	4.2014e+06	2.57824e+06	2077798	1.75942e+06	3.20672e+06	4.27825e+06	9509962	1.00714e+07	5.15785e+06	3.48044e+06	1.0746e+06		3.25942e+06	3.14827e+06	2.49469e+06	2.41162e+06	6.1945e+06	4.31816e+06	9.08875e+06	8.41387e+06	4.80941e+06	4.59957e+06	6.72451e+06	7.05234e+06	3.80972e+06	3.87124e+06	1.31025e+06	1.05414e+06	1.10831e+07	5.72469e+06	1.64272e+07	1.55742e+07	10470196	6.02366e+06
AT1G44575.3	5.46807e+08	1.03025e+09	2.66752e+08	1.56759e+08	3.72488e+08	3.70926e+08	1.64871e+08	1.80727e+08	9.14375e+08	1.73255e+08	1.33094e+08	1.52116e+08	3.38411e+08	2.89758e+08	2.1986e+08	1.95601e+08	173392011	8.10063e+08	2.17143e+08	9.14824e+08	2.43873e+08	2.48738e+08	1.20382e+09	1.08531e+09	1.23963e+09	1.24983e+09	2.25759e+08	1.14732e+09	1.75599e+09	1.34434e+09	2.47193e+08	2.34494e+08	3.01129e+08	2.75009e+08	2.48958e+08	2.22988e+08	3.98688e+08	2.99342e+08	2.25633e+08	2.09792e+08	3.57771e+08	8.45355e+08	3.64876e+08	2.81005e+08	1.94223e+08	7.01935e+08	1.22881e+09	1.02983e+09
AT1G44790.1	2.32665e+07	1.85626e+07	2.20107e+07	6.13025e+06	1.47829e+06	318096	5.79965e+06	4.45678e+06	1.0105e+07	4.08379e+06	4.87514e+06	5.53346e+06	7.51978e+06	9.44527e+06	3.31076e+06	7.41219e+06	2.32807e+06	3.08536e+06	4.98128e+06	3.9427e+06	1.91665e+06	3.08164e+06	5892863	6.61975e+06	3.1652e+07	2.23272e+07	324583	1.35755e+07	3.72094e+07	2.95975e+07	1.69917e+07	302853	403483	342555	318480	2.89344e+06	520329	470595	327229	304296	8.71215e+06	141523	487543	1.77151e+06	1.37379e+06	1.31572e+06	1.29392e+07	1.11482e+07
AT1G44820.1	128220896	55649924	8.59823e+07	52882716	88296360	74042454	66594952	72044993	82490329	66604960	79280440	8.44559e+07	119799556	104938200	72611696	5.91614e+07	81221936	68186920	76420392	69651200	137889830	153725924	9.42184e+07	7.95403e+07	1.30858e+08	1.2023e+08	81534120	91467032	139673065	110192219	135742352	99870857	126358024	42600184	142467284	68929936	8990099	15491478	9.98171e+07	111303936	1.12946e+08	96529974	129230472	94010128	135535777	117133756	215270032	123253224
AT1G44835.2	1.70007e+07	9.72007e+06	1.0194e+07	2.67478e+06	9.92372e+06	7.02789e+06	1.39723e+07	4971593	5.29029e+06	5.56018e+06	3.80644e+06	3.74254e+06	1.10524e+07	7.75441e+06	3.41182e+06	6.36286e+06	2.45894e+06		4.63898e+06	3.28619e+06	11098959	6201693	4706111	537686	2.72548e+07	18584466	4.45925e+06	4.4963e+06	12450691	1.03058e+07	6335322	5.04036e+06	12318732	1.14144e+07	7855770	1.09849e+07	16423372	9123664	9.70348e+06	7.7933e+06	5.60768e+06	2.58357e+06	1.67708e+07	6.79251e+06	6695411	4297837	16154193	7.39131e+06
AT1G44920.1	633794	607388	539587	497425	1.75568e+06	1.84862e+06	696520	792082	743223	749922	812748	858732	1.55861e+06	1.47838e+06	839563	833646	984464	949980	783650	843162	1.34803e+06	1.34475e+06	1.0733e+06	975796	1.59894e+06	1.49647e+06	1.75809e+06	1.49247e+06	972601	1.04981e+06	1.78715e+06	1.54621e+06	2.31572e+06	2.16521e+06	1.2745e+06	1.24883e+06	3.08026e+06	2.68438e+06	1.91698e+06	1.69275e+06	1.43036e+06	946415	3.3544e+06	2.39712e+06	1.4707e+06	1.19592e+06	957205	920498
AT1G45000.1	3.27116e+08	1.42099e+08	3.16633e+08	1.88562e+08	1.3297e+08	1.39908e+08	1.74473e+08	1.38577e+08	1.73511e+08	1.40145e+08	1.15096e+08	1.69774e+08	2.00931e+08	1.77008e+08	1.57318e+08	1.65906e+08	1.11996e+08	1.2497e+08	1.94632e+08	1.58783e+08	1.53907e+08	1.58787e+08	2.0914e+08	1.66013e+08	3.12375e+08	3.02138e+08	1.08498e+08	1.55818e+08	3.04906e+08	2.00184e+08	1.53458e+08	1.23536e+08	1.79035e+08	1.34643e+08	1.37468e+08	1.40264e+08	1.6092e+08	1.33646e+08	1.17062e+08	1.21108e+08	1.10816e+08	7.90542e+07	1.92686e+08	1.21176e+08	1.57776e+08	1.31094e+08	4.02986e+08	1.80824e+08
AT1G45130.1	8958279	877232			4474007	4885113			2589107	3.6048e+06	4.17641e+06	3.08379e+06	5.4309e+06		1615410	1.32469e+06	4582528	1.85601e+06	2.9106e+06	3.65223e+06	2.88018e+06	3.40824e+06	2.77716e+06				4.40889e+06	987023	4.04909e+06	812192	2223369		2.46414e+06	2.95953e+06	3.82101e+06	4276640	7283217	3052820	2.77659e+06	1.74237e+06		2.18344e+06	3.4227e+06	2.57212e+06	2.2365e+06	2.12127e+06	4255506	1815182
AT1G45145.1	1.6062e+07	5.7273e+06	3.71589e+06	3.30448e+06	2.03113e+07	2.18128e+07	9.25484e+06	1.04648e+07	1.08875e+07	1.42215e+07	1.62362e+07	1.52644e+07	2.00557e+07	1.71204e+07	8.1818e+06	1.10008e+07	9.1874e+06	9.30341e+06	2.02882e+07	1.92123e+07	2.69539e+07	2.9916e+07	2.2523e+07	2.04879e+07	2.07271e+07	1.01e+07	2.01713e+07	2.89857e+07	1.43765e+07	1.25314e+07	3.03796e+07	2.56816e+07	5.25617e+07	4.61599e+07	4.23033e+07	4.06537e+07	3.87025e+07	3.27923e+07	2.1339e+07	1.59924e+07	1.3702e+07	1.1472e+07	4.83108e+07	4.17334e+07	3.15127e+07	1.86947e+07	2.5458e+07	2.20136e+07
AT1G45201.3	2.50358e+08	1.39313e+08	1.79088e+08	1.43311e+08	3.91621e+08	3.85148e+08	1.30408e+08	1.45963e+08	1.64481e+08	1.33305e+08	1.33642e+08	1.6036e+08	3.57824e+08	3.19682e+08	1.60716e+08	1.8235e+08	1.80217e+08	1.72989e+08	1.68739e+08	1.5585e+08	2.07787e+08	2.13082e+08	1.77348e+08	1.21236e+08	2.25453e+08	2.07703e+08	3.02158e+08	2.76863e+08	2.9402e+08	2.55089e+08	2.53686e+08	2.11628e+08	2.4325e+08	2.31492e+08	1.67779e+08	1.65256e+08	4.64849e+08	4.17987e+08	2.6753e+08	2.53435e+08	2.43592e+08	1.68113e+08	2.44605e+08	1.83831e+08	1.56229e+08	111424851	2.4945e+08	1.31796e+08
AT1G45230.1	2.28044e+06	599920	917638	567690	1.3476e+06	1.41933e+06	89510.6	539551	820403	717618	1.23344e+06	788787	2.21725e+06	385459	988142	977280	1.08308e+06	845330	572195	133680	1.9776e+06	219887	799762	822115	2.06627e+06	234808	453198	1.43167e+06	326083	344662	319095	289096	1.68085e+06	537138	958200	712868	4113444	2.44555e+06	474717	3.00114e+06	1.015e+06	954064	838482	3.0594e+06	1.54563e+06	290936	188056	922800
AT1G47128.1	3.66445e+08	1.78372e+08	2.72903e+08	1.44761e+08	2.59499e+08	2.444e+08	2.10729e+08	2.06064e+08	2.03486e+08	1.82002e+08	1.83778e+08	2.00822e+08	2.67621e+08	2.45453e+08	187681105	1.88835e+08	1.77459e+08	1.75309e+08	2.38576e+08	2.13569e+08	2.62115e+08	2.52333e+08	3.0694e+08	2.64857e+08	1.72493e+08	1.48092e+08	1.73118e+08	1.9084e+08	373349861	2.55797e+08	2.48901e+08	1.59725e+08	2.18053e+08	2.19927e+08	2.43694e+08	2.22304e+08	2.66096e+08	2.08612e+08	1.55099e+08	1.48111e+08	1.60213e+08	1.21814e+08	2.40134e+08	1.65205e+08	1.91715e+08	1.54637e+08	3.3054e+08	1.98897e+08
AT1G47200.1	4.77769e+07	3.47658e+07	3.83206e+07	3.83138e+07	60771966	53503498	6.56947e+07	9.42472e+07	6.79618e+07	5.09294e+07	48717975	5.58287e+07	1.21593e+08	7.01996e+07	4.46751e+07	39460351	51289450	50310128	6.12414e+07	6.11272e+07	7.87119e+07	78687386	5.83083e+07	47446008	4.06507e+07	62771804	48231988	4.79437e+07	66097618	86297172	4.11539e+07	35242131	55574098	57420969	42961666	39533264	6.51205e+07	5.76781e+07	40022358	4.0677e+07	3.3687e+07	2.63859e+07	67006315	5.39089e+07	5.03978e+07	45573456	5.66127e+07	3.71612e+07
AT1G47260.1	1.82499e+08	8.73497e+07	1.14509e+08	6.76184e+07	2.17102e+08	2.08815e+08	1.29666e+08	1.34839e+08	1.65312e+08	1.34906e+08	1.46251e+08	1.54439e+08	220104353	1.99822e+08	1.34606e+08	1.25951e+08	1.53131e+08	1.51249e+08	1.77318e+08	1.61246e+08	2.20265e+08	2.11788e+08	1.88269e+08	1.55456e+08	1.2187e+08	1.09142e+08	1.32808e+08	1.20745e+08	1.92724e+08	1.62302e+08	1.33597e+08	1.19424e+08	1.80623e+08	1.73675e+08	1.46842e+08	1.41026e+08	196821272	1.73606e+08	1.3362e+08	1.21317e+08	1.1738e+08	8.15635e+07	2.20843e+08	1.62779e+08	1.47603e+08	1.23981e+08	1.90815e+08	1.04743e+08
AT1G47380.1		7774.34			58159.5	110701	5433.8								39835.3	75457.4			10650						61379.7	90413.5	55028.7	60005.4			151953	133577	48953.6	45237.1	52654.3	60667.2	126950	72105.1	103138	66030.6	227657	90740.8	44136.9		12115.8	30131.5	53146.5	68848.5
AT1G47420.1	1.71228e+07	1.29568e+07	1.38681e+07	9.0085e+06	8.41141e+06	7.3429e+06	1.04247e+07	8.5658e+06	8.72649e+06	4.39699e+06	5.60581e+06	4.91354e+06	6.74607e+06	7.3228e+06	9.00225e+06	8.33764e+06	5.34041e+06	3.11001e+06	7.63721e+06	5.18569e+06	9.73771e+06	7.82041e+06	5.88392e+06	6.013e+06	1.54318e+07	1.51899e+07	6.41987e+06	3.89249e+06	1.17027e+07	1.16043e+07	8.86063e+06	7.48297e+06	1.0459e+07	9.55462e+06	9.94222e+06	1.04462e+07	1.01647e+07	1.15827e+07	8.65268e+06	6.24624e+06	5.96266e+06	5.39553e+06	9.21578e+06	9.72402e+06	7.88856e+06	6.86404e+06	1.44132e+07	1.21733e+07
AT1G47500.1	618569	116659	1.02234e+07	3.61162e+06	15308.8	67233.9		52251.8	31872.7	18632.9	15072.7	120463	404956	279101	124074	130753	172858	7234.62	46367.4	133019	98846.7	20322.7				37375.8	170690				70257.3	146762	243940	59705.6	36056.7	68975.1		14895.9	147625	155269	71874.3	53907.2		20567.2	207058			143897
AT1G47550.2								847348	3359.89		3856.12								3972.89						4.08098e+06	3.38842e+06			2.21855e+06	4.37783e+06									4982.33	11054.3				8609.84		5508.24	2.24669e+06
AT1G47600.1	8.029e+07	8.38356e+07	27730357	24828833	4.00994e+07	3.60318e+07	2.28454e+07	97092702	5.12447e+07	4.91258e+07	3.83099e+07	5.78296e+07	2.64138e+07	2.37045e+07	3.12464e+07	2.58254e+07	3.03907e+07	3.53013e+07	5.69677e+07	50280802	5.37447e+07	5.98904e+07	5.67258e+07	4.4225e+07	1.1799e+08	106928513	6.63966e+07	1.45401e+08	1.23123e+08	122422895	3.93398e+07	80175189	1.04113e+08	85403941	7.31619e+07	6.71586e+07	3.25565e+07	3.20562e+07	5.58914e+07	5.78308e+07	4.84147e+07	4.46529e+07	85671481	7.56714e+07	93076263	7.97204e+07	1.48896e+08	1.39801e+08
AT1G47640.1	1.12931e+07	9.23085e+06	6.28651e+06	5.96196e+06	2.62215e+07	2.15947e+07	1.55448e+07	1.60834e+07	1.78329e+07	1.6758e+07	1.77923e+07	2.04542e+07	2.35942e+07	2.61915e+07	1.31275e+07	9.94459e+06	1.16952e+07	1.24289e+07	1.96041e+07	1.97871e+07	2.89747e+07	2.7647e+07	2.1285e+07	1.81274e+07	1.30458e+07	11711696	1.36734e+07	1.44493e+07	1.51815e+07	1.51348e+07	1.65229e+07	15372197	2.62018e+07	2.22493e+07	2.21085e+07	2.02135e+07	2.5649e+07	2.21883e+07	1.40152e+07	1.44392e+07	1.1362e+07	8.25773e+06	3.37881e+07	2.45506e+07	1.88855e+07	1.78399e+07	2.29727e+07	1.7807e+07
AT1G47710.2	1.67763e+07	9.05567e+06	1.49672e+07	1.04258e+07	4.34972e+07	2.5169e+07	2.09716e+07	1.73822e+07	2.16598e+07	1.47381e+07	1.93844e+07	1.29359e+07	2.63312e+07	2.64746e+07	1.56975e+07	1.68921e+07	2.46645e+07	18240336	2.67964e+07	2.50521e+07	3.87582e+07	39420058	2.56579e+07	2.28133e+07	1.99251e+07	20292762	2.71789e+07	2.59203e+07	35801461	2.7014e+07	2.8239e+07	1.76727e+07	40840209	3.02314e+07	2.44695e+07	1.53984e+07	25443732	2.27127e+07	2.53911e+07	2.2197e+07	1.01095e+07	7.2524e+06	39009136	1.68445e+07	2.86303e+07	1.94623e+07	35999679	1.82714e+07
AT1G48030.5	1.09503e+09	5.35952e+08	1.0906e+09	5.76275e+08	1.34114e+09	1.33415e+09	7.21494e+08	7.3962e+08	7.83882e+08	7.42107e+08	8.00101e+08	8.48908e+08	1.15516e+09	1.07247e+09	8.89117e+08	7.5061e+08	7.27211e+08	7.0186e+08	9.05407e+08	8.22352e+08	1.30182e+09	1.13092e+09	9.47003e+08	6.89517e+08	9.26561e+08	8.34505e+08	1.18946e+09	1.11953e+09	1.08059e+09	9.34675e+08	1.15363e+09	1.0172e+09	1.19586e+09	1.19318e+09	8.95489e+08	8.28817e+08	1.60476e+09	1.39604e+09	1.03425e+09	1.02528e+09	1.08339e+09	8.14804e+08	1.20284e+09	1.00345e+09	1.06677e+09	9.40697e+08	1.37596e+09	8.42835e+08
AT1G48110.2	1.28566e+06	562374	1.50971e+06	643234	950019	879950	919739	881368	950196	1.17317e+06	1.15467e+06	1.10423e+06	1.36173e+06	1.73829e+06	650305	615935	1.1718e+06	1.11035e+06	1.11105e+06	1.15203e+06	1.84578e+06	1.79859e+06	1.27298e+06	1.53565e+06	911999	939123	948188	909742	1.10339e+06	1.55972e+06	985092	1.11618e+06	2.80887e+06	2.3389e+06	1.50773e+06	1.39899e+06	1.98881e+06	1.86188e+06	1.02762e+06	799801	393904	323032	2772570	1.82701e+06	2.15578e+06	1.78291e+06	929939	833610
AT1G48160.2	18789816	15557134	23294030	1.78255e+07	19906359		1.8289e+07	24980360	2.9724e+07	3.23959e+07	13084140	27663416	29374402	31503908	14917137	24194176	11870459	2.17465e+07	2.25305e+07	3.32578e+07	2.0008e+07	13766342	37378724	2.88147e+07	32497000	3.28079e+07	9571278	35245026	22272120	28536713	31645034	41350302	3.64564e+07	8620741	16923976	10617215	7.15977e+06		19253699	30319742	10307582	2.02655e+07	28718712	17090811	43454992	4.32394e+07	2.60708e+07	26489551
AT1G48320.1	2.10484e+06	2.03804e+06	5.17167e+06	3.97007e+06	8055421	8.24632e+06	5.86822e+06	7.60307e+06	8169092	6555059	3.78081e+06	7265786	6.40074e+06	6.03871e+06	4681508	4.39365e+06	2.01863e+06	1.59367e+06	6.69989e+06	5.98672e+06	8572451	9747570	8737553	3.35965e+06	3.6109e+06	3.16683e+06	8.31446e+06	6.83285e+06	1.1274e+07	7.96203e+06	9.30931e+06	3.28175e+06	10957954	11258880	9.9169e+06	9.33257e+06	9216285	9283895	4.65487e+06	7.35696e+06	3.31018e+06	2.3218e+06	13798735	8.81892e+06	6.0016e+06	5.8288e+06	14635600	7725167
AT1G48350.1	1.56432e+08	6.1817e+07	2.06019e+08	1.01206e+08	1.28358e+08	9.07148e+07	7.86351e+07	8.14348e+07	7.15573e+07	6.87981e+07	7.56684e+07	9.6656e+07	1.39759e+08	1.10417e+08	1.15384e+08	9.78792e+07	8.27368e+07	6.84574e+07	8.48169e+07	7.17417e+07	91874241	8.65974e+07	8.88082e+07	6.61253e+07	9.30187e+07	6.58607e+07	1.16007e+08	9.69321e+07	1.56556e+08	8.59342e+07	9.73431e+07	5.86836e+07	5.59673e+07	7.57436e+07	6.60744e+07	65343152	1.56543e+08	1.16641e+08	8.4405e+07	1.06705e+08	5.22098e+07	4.84298e+07	6.75897e+07	8.52813e+07	7.75487e+07	8.68219e+07	146330333	6.26103e+07
AT1G48410.2	169612281	7.38809e+07	1.14336e+08	8.49127e+07	1.15613e+08	1.14473e+08	9.63629e+07	9.20633e+07	1.11352e+08	9.05371e+07	9.58965e+07	1.10813e+08	1.31925e+08	1.16706e+08	9.06182e+07	8.74673e+07	8.14759e+07	8.19896e+07	1.15532e+08	1.06526e+08	1.35348e+08	1.24216e+08	1.24882e+08	1.0133e+08	1.12173e+08	1.05986e+08	9.51779e+07	9.79422e+07	1.04151e+08	8.64907e+07	1.28528e+08	1.06546e+08	1.25576e+08	1.25838e+08	1.07767e+08	9.73872e+07	1.20954e+08	1.18437e+08	8.85675e+07	9.0546e+07	9.46866e+07	7.22684e+07	1.36858e+08	1.11134e+08	124932260	1.10549e+08	1.60561e+08	9.79964e+07
AT1G48420.3	8.2756e+07	35100609	5.40006e+07	3.49804e+07	3.83909e+07	4.6622e+07	4.19664e+07	4.94695e+07	5.01118e+07	4.29556e+07	4.39362e+07	4.61337e+07	4.25423e+07	4.11301e+07	4.42308e+07	2.89005e+07	4.03835e+07	3.9142e+07	4.10871e+07	4.50707e+07	4.80054e+07	4.90501e+07	5.91506e+07	3.60692e+07	2.7339e+07	2.19246e+07	3.98275e+07	2.7169e+07	5.3614e+07	5.31978e+07	2.08744e+07	1.7764e+07	2.90324e+07	4.86481e+07	3.66142e+07	2.95683e+07	3.8165e+07	4.70399e+07	2.48491e+07	3.14125e+07	2.40541e+07	1.3803e+07	3.50526e+07	4.24793e+07	4.26221e+07	2.44357e+07	52535307	2.55522e+07
AT1G48440.1	50804484	15401149	3.61931e+07	7.5073e+06	16616230	12176305	17294522	17880196	22676518	26922394	18229104	24199456	27537828	2.90905e+07	12413673	16411751	14975062	17411980	24480622	32324976	22089828	18193714	46624264	46019868	22122064	17863186	23060860	17094022	84777984	28813136	5.05151e+07	4.13678e+07	55797880	39085208	5.9147e+07	47149620	752356	1.01574e+07	2.09555e+07	23903180	2.11574e+07	2.50708e+07	60162724	35432976	40573884	30276180	45692224	24068602
AT1G48460.1	2.00988e+06	3.05388e+06	1.76251e+06	2.66703e+06	4671691	4.70839e+06	4.46921e+06	4500664	5.80423e+06	4.06141e+06	1438385	5.34637e+06	9050394	4.73139e+06	5.39934e+06	2.01098e+06	1.59369e+06	1.91386e+06	6.41881e+06	2.35839e+06	3.52452e+06	3.50893e+06	5.95156e+06	1.72699e+06	4.7323e+06	2.11972e+06	4242489	6.90511e+06	8.60693e+06	1.01692e+07	7087245	3.32581e+06	7028843	6.92732e+06	6.3397e+06	5629066	9946305	8071396	4.59532e+06	3.85519e+06	4.23515e+06	1.66524e+06	10712425	6883299	4482419	3.12447e+06	7.50275e+06	4991667
AT1G48480.1	17012307	3.68854e+06	1.17867e+07	6.20372e+06	1.19556e+07	1.0911e+07	3.8465e+06	2.61327e+06	1.11799e+07	4.4709e+06	1.06373e+07	5.81384e+06	2.37515e+07	2.12781e+07	1.6376e+07	4.04107e+06	1.50791e+07	5.79932e+06	5.71326e+06	4.29586e+06	6.55286e+06	4.04167e+06	6.42555e+06	4.94451e+06	9.74258e+06	8.90407e+06	1.61135e+07	1.35138e+07	5.67755e+06	3.81012e+06	7.07199e+06	1.21679e+07	1.94238e+07	1.76225e+07	8.43162e+06	8.70529e+06	3.21012e+07	2.1186e+07	1.82147e+07	1.59662e+07	1.71715e+07	1.11274e+07	7.04385e+06	1.35796e+07	1.50678e+07	1.16301e+07	9.24617e+06	4.50392e+06
AT1G48520.1	1.24301e+08	9.667e+07	1.15545e+08	7.73592e+07	1.87757e+08	1.65849e+08	5.01282e+07	1.27775e+08	1.46838e+08	1.40016e+08	1.17411e+08	6.95866e+07	2.16715e+08	1.57189e+08	1.44396e+08	1.2677e+08	6.22365e+07	1.34734e+08	7.64232e+07	1.46683e+08	1.74839e+08	1.72505e+08	6.81242e+07	1.09206e+08	130223928	1.25837e+08	1.52693e+08	1.62984e+08	1.50875e+08	1.296e+08	1.25391e+08	1.12757e+08	1.4183e+08	1.37291e+08	9.40184e+07	9.79063e+07	1.98902e+08	1.67841e+08	1.27772e+08	1.27751e+08	1.13635e+08	9.85172e+07	1.66994e+08	1.26129e+08	1.33503e+08	1.39138e+08	1.40888e+08	8.88731e+07
AT1G48570.1	133771	174798	103087	296492	296082	279709	181721	581201	138596	151537	223296	622070	217479	304024	274668	210572	133817	215552	240808	243170	1.00617e+06	983967	274339	815522	373011	392361	407793	439474	747905	765462	451518	467925	487859	552094	294465	934760	563632	560914	538737	437616	662745	237709	1.52576e+06	703098	762231	1.0077e+06	1.32624e+06	351805
AT1G48600.2	5.1625e+08	1.89178e+08	3.92136e+08	2.1507e+08	3.65676e+08	3.39585e+08	2.52359e+08	2.54265e+08	2.80086e+08	2.39139e+08	2.73351e+08	3.16801e+08	3.59148e+08	3.38643e+08	2.66101e+08	2.30297e+08	2.25791e+08	2.17487e+08	2.68818e+08	2.42909e+08	3.18133e+08	3.13884e+08	2.839e+08	2.47001e+08	2.92817e+08	2.60683e+08	2.53137e+08	2.32648e+08	2.76376e+08	2.27797e+08	2.95866e+08	2.63563e+08	3.14378e+08	3.06089e+08	2.98209e+08	2.85855e+08	4.20568e+08	3.5882e+08	2.45005e+08	2.29233e+08	2.33792e+08	1.84857e+08	3.68453e+08	2.80512e+08	2.56893e+08	2.3252e+08	3.93748e+08	2.6612e+08
AT1G48610.1	91756186	1.64452e+07	40164819	1.68604e+07	3.10243e+06	8.60391e+06	1.90174e+06	58119.6	1.24772e+06	340148	1.65212e+07	2.73418e+06	2.93979e+07	2.82215e+07	2.5982e+06	519695	3.17264e+06	1.26835e+06	1.83293e+06	659424	1.08391e+06	1.43998e+06	3.41416e+06	2.2067e+06	4.95397e+06	1.22348e+07	2.34934e+06	1.19077e+06	4.1985e+07	1.70917e+07	3.29768e+06	2.19206e+06	2.10116e+06	1.1587e+07	4.56757e+06	1.18302e+07	6.7303e+06	1.06994e+07	4.10312e+06	2.5834e+06	4.93802e+06	2.62133e+06	893603	7.14464e+06	2.9803e+06	1.12789e+07	22731091	2.22626e+07
AT1G48620.1	4.21728e+06	45790.4	3.28858e+06	17601.3	4.2526e+06	3.68869e+06	82649.9	112882	1.91036e+06	1.41297e+06	2.57326e+06	160591	2.33697e+06	886243	1.4235e+06	54258.5	1.77764e+06	179432	4.62726e+06	92628.8	3.8304e+06	2.20874e+06	3.22441e+06	88168.3	71701.7	68880.8	2.91271e+06	114938	4.31606e+06	136618	540898	2.38071e+06	2.95116e+06	2.77718e+06	103633	1.1391e+06	6.29493e+06	2.29178e+06	3.09088e+06	1.64217e+06	2.13905e+06	41338.2	509604	883984	267665	763615	2.40233e+06	63679.4
AT1G48630.1	3.74623e+07	1.10659e+07	3.5601e+07	1.95698e+07	1.45448e+07	25354118	1.96819e+07	1.81274e+07	2.1805e+07	1.90267e+07	25430700	29286249	1.74272e+07	3.24058e+07	2.97741e+07	23717728	2.53686e+07	2.4044e+07	2.80803e+07	2.39006e+07	32822420	3.03594e+07	2.86054e+07	2.22233e+07	1.34731e+07	1.69353e+07	1.75813e+07	1.57538e+07	2.20775e+07	1.62654e+07	1.71314e+07	1.83789e+07	2.066e+07	1.92121e+07	1.77609e+07	2.06418e+07	27183156	2.13699e+07	2.3362e+07	1.67847e+07	2.20312e+07	1.31371e+07	1.15961e+07	12482085	14558774	1.79658e+07	3.67738e+07	1.69701e+07
AT1G48830.1	2.13248e+08	1.30889e+08	1.94745e+08	1.38957e+08	3.49245e+08	3.59625e+08	1.83612e+08	1.90257e+08	2.35372e+08	2.20481e+08	2.26864e+08	2.61542e+08	3.63601e+08	3.3764e+08	2.51445e+08	2.18986e+08	1.90413e+08	1.88478e+08	2.79656e+08	2.58734e+08	3.00977e+08	3.05512e+08	2.95745e+08	2.00843e+08	2.2887e+08	2.11433e+08	3.42945e+08	3.21453e+08	3.48964e+08	3.08755e+08	2.8861e+08	2.49264e+08	3.84248e+08	3.79114e+08	2.41478e+08	2.3871e+08	4.37801e+08	4.36165e+08	2.96235e+08	3.05525e+08	2.07613e+08	1.54189e+08	5.3779e+08	3.85457e+08	3.36429e+08	3.0711e+08	4.09595e+08	2.56418e+08
AT1G48850.1	7.62193e+08	2.92275e+08	4.79893e+08	3.09409e+08	3.04182e+08	1.84789e+08	3.07683e+08	3.5302e+08	4.36474e+08	3.31826e+08	2.52087e+08	3.65606e+08	5.0597e+08	4.76697e+08	3.30923e+08	3.23507e+08	2.70102e+08	3.41506e+08	4.13577e+08	3.79603e+08	3.34481e+08	3.00291e+08	380579552	334588397	5.28695e+08	4.71517e+08	2.01669e+08	3.614e+08	5.81278e+08	4.32045e+08	4.34003e+08	4.00588e+08	3.23127e+08	1.73959e+08	2.74445e+08	1.48837e+08	2.21412e+08	209309763	2.62359e+08	3.94963e+08	2.94755e+08	3.25748e+08	2.07439e+08	1.60077e+08	4.48913e+08	3.70999e+08	5.11229e+08	3.51927e+08
AT1G48860.1	1.52502e+08	4.5054e+07	1.24287e+08	82560184	5.27719e+07	4.95768e+07	4.97942e+07	3.77996e+07	5.30868e+07	3.04324e+07	4.20769e+07	35914448	4.97277e+07	4.47577e+07	4.43915e+07	3.57147e+07	4.75147e+07	41284862	4.43866e+07	32023193	5.38186e+07	4.62735e+07	4.63116e+07	3.91462e+07	9.86492e+07	7.64873e+07	3.60651e+07	2.83216e+07	1.45941e+08	1.08851e+08	3.25636e+07	2.58246e+07	3.28743e+07	2.83526e+07	3.98557e+07	4.21362e+07	54017576	3.71688e+07	3.29008e+07	30715303	4.30671e+07	2.58655e+07	3.31726e+07	3.08074e+07	2.87025e+07	2.65906e+07	1.00074e+08	46261062
AT1G48900.1	2.85061e+07	1.3943e+07	1.94395e+07	1.23465e+07	2.53747e+07	2.27186e+07	9.88923e+06	1.76123e+07	1.88018e+07	1.63472e+07	9.26726e+06	2.15023e+07	2.66481e+07	2.39168e+07	9133740	1.77332e+07	1.93737e+07	1.33902e+07	1.6791e+07	1.61084e+07	9.92499e+06	1.18489e+07	1.94553e+07	1.09717e+07	2.09542e+07	2.22366e+07	2.31033e+07	2.27666e+07	2.32332e+07	1.89352e+07	2.30026e+07	2.338e+07	2.44225e+07	2.41114e+07	2.69588e+07	2.32548e+07	3.52978e+07	2.81849e+07	2.69053e+07	2.29382e+07	2.74938e+07	2.14008e+07	3.39082e+07	2.66026e+07	2.61354e+07	2.40591e+07	3.5303e+07	2.27391e+07
AT1G48920.1	2.05481e+09	7.2423e+08	1.32719e+09	6.58791e+08	9.87626e+08	9.09591e+08	7.10822e+08	6.69992e+08	7.49973e+08	6.20383e+08	8.13625e+08	7.62097e+08	1038074796	8.62626e+08	9.11562e+08	7.82386e+08	7.3932e+08	7.20914e+08	9.11936e+08	7.45274e+08	9.42795e+08	8.19598e+08	9.2953e+08	7.47208e+08	8.80716e+08	7.34691e+08	6.99254e+08	8.44035e+08	1.23241e+09	8.84678e+08	7.74151e+08	6.15732e+08	7.9022e+08	7.60607e+08	7.87415e+08	7.16472e+08	1.23189e+09	8.76857e+08	8.0441e+08	6.8733e+08	8.4338e+08	5.50322e+08	9.38986e+08	7.37674e+08	7.09465e+08	5.82504e+08	1.46454e+09	8.46461e+08
AT1G49300.1	2.4981e+07	2.15596e+07	56059617	3.19052e+07	1.46208e+07	1.28611e+07	1.43315e+07	5.52599e+06	1.2054e+07	6.26055e+06	9.41786e+06	8.63614e+06	11648682	8.91975e+06	9.23916e+06	8.18453e+06	9.33838e+06	7.63916e+06	1.01064e+07	8.02351e+06	11445476	9.38406e+06	1.05271e+07	6.98532e+06	3.77246e+07	3.0544e+07	8.55717e+06	6.61939e+06	10545329	5.94632e+06	6.30845e+06	7.01648e+06	8.84249e+06	8.33624e+06	9350589	6.93476e+06	13043257	9.85054e+06	7.05245e+06	7.45735e+06	11512141	8259839	8987130	6.59866e+06	8548570	5.55752e+06	1.31115e+07	1.15112e+07
AT1G49600.3	3.11962e+07	1.54745e+07	1.60896e+07	1.13817e+07	2.6339e+07	2.61579e+07	1.9335e+07	1.86136e+07	1.94934e+07	1.73816e+07	1.98539e+07	2.37842e+07	3.20871e+07	2.95694e+07	2.33314e+07	19489887	2.36852e+07	2.07996e+07	2.13748e+07	2.01643e+07	3.29949e+07	2.87093e+07	2.52303e+07	2.08879e+07	1.54054e+07	12972173	1.89781e+07	15386481	2.5473e+07	1.83501e+07	1.66076e+07	1.62539e+07	2.24698e+07	1.94653e+07	1.74846e+07	1.53096e+07	3.30234e+07	2.10659e+07	1.79491e+07	1.87945e+07	1.924e+07	1.47285e+07	2.81501e+07	2.10648e+07	2.27072e+07	1.73281e+07	31898955	1.79413e+07
AT1G49650.1	16755435	6.7416e+06	21653286	16919578																					5.29587e+06	3962117
AT1G49660.1	2.23783e+07	1.30135e+07	1.51408e+07	1.04858e+07	2.15468e+07	2.15094e+07	1.90861e+07	2.1249e+07	2.14367e+07	1.86381e+07	2.35967e+07	2.40883e+07	2.00067e+07	1.94226e+07	1.80322e+07	1.5385e+07	1.65942e+07	1.54522e+07	2.41882e+07	2.32538e+07	3.07919e+07	3.08417e+07	2.6362e+07	2.41726e+07	1.54607e+07	1.36604e+07	1.96674e+07	1.82176e+07	2.45474e+07	2.12541e+07	2.31928e+07	1.88411e+07	3.07403e+07	3.12195e+07	2.75797e+07	2.80725e+07	2.59191e+07	2.33603e+07	2.18634e+07	1.84703e+07	1.75742e+07	1.25084e+07	3.91787e+07	2.95985e+07	3.08476e+07	2.46672e+07	4.52854e+07	2.42772e+07
AT1G49670.2	1.93363e+07	1.2751e+07	1.22623e+07	1.20766e+07	4.65652e+07	4.94026e+07	37094866	4.04099e+07	4.16729e+07	3.35588e+07	3.24739e+07	4.39921e+07	48750347	41451202	1.94145e+07	2.10258e+07	1.885e+07	1.70662e+07	5.61348e+07	5.20153e+07	8.05704e+07	79020843	5.0499e+07	3.76871e+07	2.35207e+07	1.30307e+07	3.71594e+07	3.26076e+07	4.52494e+07	43541653	6.08902e+07	4.61549e+07	9.07371e+07	8.40441e+07	74105769	65358719	56237816	53598926	3.45427e+07	3.46118e+07	2.40172e+07	1.29012e+07	103718667	7.23503e+07	5.9754e+07	4.52333e+07	7.30269e+07	50436786
AT1G49750.1	4.96549e+07	1.51607e+07	22991166	1.46099e+07	2.1592e+07	1.02185e+07	16960674	17320086	1.71979e+07	1.62834e+07	1.56247e+07	2.12139e+07	23565849	2.22135e+07	27367950	1.64558e+07	16493061	16549949	1.8227e+07	1.43847e+07	1.1885e+07	15999948	2.00252e+07	14668741	1.48941e+07	1.41724e+07	1.69932e+07	1.75716e+07	1.50054e+07	10289747	28837151	25517230	2.40908e+07	7.89147e+06	32380905	1.24689e+07	4.9956e+06	4.6909e+06	2.50967e+07	2.15067e+07	2.03451e+07	2.00383e+07	13894376	8.53872e+06	2.17452e+07	1.68052e+07	20042727	1.52104e+07
AT1G49760.2	1.37194e+09	6.62733e+08	8.79753e+08	5.4689e+08	1.00166e+09	9.22833e+08	9.37817e+08	8.72077e+08	9.01207e+08	8.03593e+08	9.71398e+08	1.01832e+09	9.89032e+08	8.82163e+08	8.49121e+08	7.57842e+08	8.08705e+08	7.40493e+08	1.06493e+09	9.44714e+08	1.22189e+09	1.1539e+09	1.09218e+09	9.2733e+08	7.28912e+08	6.76806e+08	7.80365e+08	7.23012e+08	1.1131e+09	7.94375e+08	8.90023e+08	7.60063e+08	1.06653e+09	1.01924e+09	1.0197e+09	9.60182e+08	1.09076e+09	9.28283e+08	889639206	7.28388e+08	7.98667e+08	6.57232e+08	1.17216e+09	1.0336e+09	1.0872e+09	9.55834e+08	1.5509e+09	9.52065e+08
AT1G49820.1	7426689	6.11844e+06	3.34733e+07	1.61997e+07	4.21658e+07	37914912	1.69635e+07	2.01212e+07	2.26564e+07	2.17028e+07	1.46442e+07	27725740	3.54885e+07	35988524	2.41838e+07	1.99012e+07	1.22305e+07	1.19139e+07	2.66735e+07	2.66583e+07	3.81525e+07	3.97101e+07	2.8207e+07	1.3771e+07	1.14871e+07	1.16217e+07	23156925	22343074	26469421	2.65762e+07	2.41694e+07	1.4918e+07	3.19916e+07	3.06383e+07	16025757	1.76017e+07	34100481	3.50484e+07	17806289	24009339	1.06087e+07	7.60697e+06	36049763	30060477	22548952	2.23674e+07	3.02248e+07	1.32865e+07
AT1G49970.1	1.02249e+09	2.16651e+08	4.01227e+08	2.0532e+08	2.97289e+08	1.91413e+08	2.59804e+08	2.67979e+08	3.70671e+08	3.70137e+08	1.89232e+08	2.86394e+08	4.27396e+08	4.06187e+08	3.49796e+08	3.73721e+08	2.06912e+08	2.70687e+08	310052923	3.48594e+08	4.24189e+08	228047254	2.60971e+08	2.44808e+08	4.81924e+08	4.13718e+08	4.82115e+08	3.96788e+08	4.58308e+08	2.34351e+08	6.49357e+08	5.90078e+08	6.24933e+08	3.26611e+08	5.31193e+08	3.62567e+08	59540531	9.55196e+07	4.80834e+08	4.60916e+08	4.11485e+08	4.48926e+08	4.85284e+08	2.84795e+08	5.43785e+08	3.92422e+08	5.3296e+08	3.13294e+08
AT1G49975.1	60104	201961	110737	120486	384041	280950	243658	293235	270746	278320	346314	330216	354065	339607	123594	62214.6	398893	385526	282802	264786	404372	438776	136659	203419	390420	335437	457477	354903	132125	159558	474111	440892	460575	298131	205899	185763	525815	410547	419941	348182	282192	176031	312311	238949	255215		96051.5	167283
AT1G50030.1	514912	211732	145504	100594	1.15668e+06	1.03647e+06	427400	652642	444136	478707	479108	798427	1.1974e+06	1.0702e+06	327078	507489	369059	420365	760809	562446	1.06351e+06	1.08136e+06	653594	394874	640497	608809	1.02195e+06	1.28498e+06	880216	1.02066e+06	1.33208e+06	985299	1.88381e+06	1.56233e+06	1.82666e+06	1887744	2350236	2.48527e+06	1.36139e+06	1.13634e+06	692751	274134	2.57579e+06	1.53762e+06	1.36893e+06	822502	1.21643e+06	829105
AT1G50200.1	6.49696e+08	2.75055e+08	4.5211e+08	2.83203e+08	4.06088e+08	3.86869e+08	3.95801e+08	3.75894e+08	4.34323e+08	3.5733e+08	3.31299e+08	4.05135e+08	4.35528e+08	3.86496e+08	3.90556e+08	2.77682e+08	3.04536e+08	3.17371e+08	4.71665e+08	4.20706e+08	4.6248e+08	4.34415e+08	4.72118e+08	3.83104e+08	4.73991e+08	4.91945e+08	3.63817e+08	4.00081e+08	6.4505e+08	5.25315e+08	5.06532e+08	3.84033e+08	4.75465e+08	4.1783e+08	4.65196e+08	4.02444e+08	3.90317e+08	4.0601e+08	3.7325e+08	3.49412e+08	3.96493e+08	3.01652e+08	5.10205e+08	3.99493e+08	4.71517e+08	3.79339e+08	7.73897e+08	3.71028e+08
AT1G50200.2	7.42854e+07	41482104	6.89951e+07	27804548		611663	2.8479e+07	2.21845e+07	3.05356e+07	2.86404e+07	18074804	2.27138e+07	38706136	37553348	26683267	34399404	13777694	2.00943e+07	36824745	3.05413e+07	1.79684e+06	850796	3.66314e+07	3.18153e+07	55349354	46668836		5.01753e+07	146173936	80076888	28443624			261561				435281	701622		4235214	1.1511e+06	1.23576e+06		1.97928e+06		62518768	35942504
AT1G50250.1	5.40802e+08	2.85568e+08	4.52634e+08	2.72025e+08	3.88151e+08	2.88757e+08	2.19355e+08	2.26996e+08	2.60292e+08	2.71992e+08	1.77581e+08	2.17228e+08	4.51703e+08	5.40235e+08	2.79965e+08	3.24125e+08	1.84231e+08	1.86099e+08	2.90232e+08	2.91051e+08	2.96303e+08	2.4756e+08	3.61869e+08	3.80063e+08	4.11419e+08	3.41084e+08	1.71656e+08	2.84125e+08	6.41092e+08	4.3563e+08	4.13675e+08	3.46904e+08	4.05672e+08	2.25682e+08	2.36011e+08	1.64076e+08	2.47798e+08	2.21509e+08	2.09487e+08	2.69434e+08	3.29682e+08	3.42768e+08	2.98507e+08	2.16564e+08	2.13719e+08	2.25898e+08	3.33837e+08	2.36245e+08
AT1G50320.1	1.04883e+07	6.59309e+06	6.10921e+06	4.10271e+06	1.35198e+07	1.41635e+07	5.6655e+06	6.48174e+06	6.74588e+06	7.16074e+06	7.3207e+06	8.43752e+06	1.39044e+07	1.26357e+07	8.58617e+06	5.62147e+06	7.75199e+06	7.80102e+06	6.34768e+06	7.47856e+06	7.79039e+06	7.15828e+06	6.41092e+06	6.06525e+06	8.34636e+06	8.52347e+06	15580837	1.11313e+07	9.83031e+06	8.45147e+06	1.39506e+07	1.1308e+07	1.95236e+07	1.46755e+07	1.46085e+07	1.19607e+07	3.22583e+07	2.79494e+07	1.93614e+07	1.22105e+07	1.11728e+07	6.45324e+06	1.97547e+07	1.04251e+07	1.13177e+07	5.53434e+06	7.97789e+06	7.93358e+06
AT1G50370.1	2.61412e+07	1.73814e+07	3.29221e+07	2.55067e+07	4.5066e+07	4.50994e+07	2.90718e+07	3.03645e+07	3.61157e+07	2.41036e+07	2.72036e+07	3.01932e+07	4.96601e+07	4.78557e+07	26154857	2.98061e+07	2.38335e+07	2.63571e+07	35528972	2.74651e+07	5.00026e+07	5.20719e+07	3.62962e+07	2.7165e+07	2.16725e+07	1.96483e+07	29663424	2.68743e+07	3.22463e+07	3.13002e+07	34903528	3.28682e+07	4.68995e+07	4.62745e+07	52724212	4.82613e+07	5.26337e+07	4.81885e+07	3.09386e+07	2.87273e+07	32886506	19723008	5.93972e+07	4.16207e+07	4.00493e+07	2.99691e+07	5.31033e+07	4.16244e+07
AT1G50380.2	1.01542e+08	6.02705e+07	4.88441e+07	2.79046e+07	5.93806e+07	5.58661e+07	4.78939e+07	5.98723e+07	8.8601e+07	8.87107e+07	4.91134e+07	6.89788e+07	1.08726e+08	1.01889e+08	3.87482e+07	6.53008e+07	4.78629e+07	4.18321e+07	7.17354e+07	8.03122e+07	6.88858e+07	6.97589e+07	9.18025e+07	5.60205e+07	3.73645e+07	3.56169e+07	4.56169e+07	6.31661e+07	9.59427e+07	8.01598e+07	6.08745e+07	5.27198e+07	6.25529e+07	5.67896e+07	5.87704e+07	5.15634e+07	6.25298e+07	6.26179e+07	4.04212e+07	5.31945e+07	4.06448e+07	3.02321e+07	71820918	5.599e+07	58074609	5.11522e+07	8.88811e+07	5.10114e+07
AT1G50430.1	57852670	1.48336e+07	27563174	11164325	2.99073e+07	2.51422e+07	23213929	1.93298e+07	2.58403e+07	1.65638e+07	25095022	20196800	2.34521e+07	1.74814e+07	1.59768e+07	10626640	2.10472e+07	1.45188e+07	2.23445e+07	1.59531e+07	3.30461e+07	23988590	2.58075e+07	21283743	28188207	24251051	1.71661e+07	9626683	38358715	2.31743e+07	19036018	1.65367e+07	33051306	3.00255e+07	3.08644e+07	2.76985e+07	46108224	17208594	1.89573e+07	15941871	19016272	12402353	34718685	3.0875e+07	30349837	2.07517e+07	3.90734e+07	1.54012e+07
AT1G50480.1	1.0179e+09	3.25078e+08	6.68395e+08	3.33295e+08	5.50772e+08	5.53966e+08	4.73217e+08	5.01524e+08	5.44945e+08	4.54291e+08	5.60715e+08	5.80831e+08	6.16005e+08	5.3218e+08	4.88773e+08	4.66642e+08	4.71805e+08	4.15638e+08	6.18343e+08	5.52011e+08	6.38279e+08	6.06518e+08	6.41718e+08	4.61572e+08	4.84286e+08	3.90421e+08	5.09166e+08	4.62144e+08	6.85214e+08	4.76846e+08	5.69074e+08	4.7364e+08	6.63418e+08	6.11121e+08	6.68979e+08	5.82872e+08	6.53161e+08	5.11873e+08	5.07998e+08	4.66264e+08	4.91924e+08	3.5817e+08	7.51538e+08	5.82988e+08	6.13852e+08	4.86667e+08	9.31741e+08	5.21212e+08
AT1G50510.1	1.34957e+07	4.21828e+06	5.71267e+06	2.12014e+06	3.99787e+06	3.35768e+06	4.65746e+06	4.34992e+06	4.34354e+06	2.38651e+06	4.04929e+06	3.62214e+06	3.76178e+06	2.31647e+06	1.68103e+06	1.61102e+06	3.46403e+06	2.87898e+06	4.44895e+06	2.80387e+06	6.02735e+06	4.80602e+06	3.63815e+06	2.96563e+06	6.16466e+06	5.80087e+06	4.42344e+06	1.15358e+06	6.18319e+06	3.73539e+06	4.23497e+06	4185445	5.83993e+06	5.28717e+06	5.49099e+06	5089588	6.63866e+06	4.11186e+06	3.51121e+06	2765101	4.30869e+06	2.52919e+06	6.92296e+06	5.23313e+06	5819349	3.95446e+06	8.38552e+06	4.95347e+06
AT1G50670.2	1.03019e+08	2.47714e+07	7.4554e+07	3.26993e+07	3.99208e+07	2.3701e+07	3.41606e+07	3.07406e+07	3.63253e+07	3.03319e+07	3.47774e+07	3.84854e+07	3.98644e+07	2.86232e+07	3.24173e+07	2.54771e+07	3.59713e+07	2.95099e+07	3.41925e+07	3.33378e+07	3.65214e+07	28981389	4.57725e+07	31671938	2.483e+07	2.28487e+07	36512655	26668842	3.51121e+07	9.4497e+07	4.29379e+07	3.66673e+07	4.91543e+07	31578080	4.64516e+07	3.76155e+07	51102243	2.8904e+07	43991121	3.57102e+07	4.06332e+07	2.78454e+07	46794391	3.83694e+07	48375344	39851954	69989437	3.37901e+07
AT1G50900.1	2.70741e+07	5.39012e+06	6.80537e+06	2.03249e+06	9429285	9.64804e+06	4.00341e+06	2.86048e+06	615386	385753	6.39939e+06	4.28264e+06	1.01933e+07	6.44838e+06	5910535	4.08096e+06	6.19378e+06	4.94796e+06	4983375	4.89944e+06	5.24542e+06	7007019	5.0249e+06	4.15231e+06	1.31087e+06	1.25427e+06	6.92829e+06	1.39535e+06	1.05581e+07	4.96167e+06	7.70805e+06	7.09448e+06	7.06619e+06	6595944	8.61725e+06	6.9681e+06	1.43332e+07	9879223	9.07688e+06	6.92937e+06	7.35757e+06	399532	9.85491e+06	5984504	1784771	3.87581e+06	1.118e+07	5.90048e+06
AT1G50920.1	3.70684e+08	1.41182e+08	3.14494e+08	1.47002e+08	2.20516e+08	2.04746e+08	1.42543e+08	2.02809e+08	2.4222e+08	2.84875e+08	1.77e+08	2.6344e+08	3.8979e+08	4.40496e+08	2.13752e+08	2.64414e+08	1.62427e+08	2.232e+08	2.59999e+08	3.03825e+08	2.53901e+08	1.94059e+08	3.21003e+08	3.08324e+08	246644196	1.93349e+08	3.38351e+08	2.66307e+08	4.60025e+08	3.1994e+08	4.73897e+08	3.87676e+08	4.93665e+08	4.5544e+08	4.47211e+08	4.10865e+08	1.17215e+08	3.61931e+08	4.09524e+08	3.61988e+08	1.8388e+08	2.47642e+08	4.02971e+08	3.24274e+08	4.28249e+08	3.21493e+08	2.93364e+08	2.20831e+08
AT1G50940.1	4161451	555219	2.15091e+06
AT1G51060.1	1.7315e+07	8.69453e+06	1.64844e+07	1.52966e+07	2.63934e+07	2.90477e+07	21332315	2.21134e+07	1.71352e+07	1.74041e+07	1.62591e+07	2.41152e+07	2.19201e+07	2.49766e+07	2.66872e+07	1.62249e+07	1.45423e+07	9.81616e+06	2.20773e+07	1.70655e+07	2.04223e+07	2.51382e+07	2.44598e+07	1.68236e+07	11847773	1.2931e+07	2.18757e+07	1.02913e+07	1.68598e+07	2.39693e+07	2.32708e+07	2.25352e+07	1.80345e+07	2.03333e+07	2.3283e+07	2.63707e+07	5.27337e+06	6.74656e+06	2.60817e+07	2.09528e+07	4.23556e+07	3.09062e+07	2.54715e+07	2.21924e+07	2.34061e+07	1.96176e+07	2.87824e+07	1.96864e+07
AT1G51100.1	5.67281e+06	1.63817e+06	1.06877e+07	4.14118e+06	6.20705e+06	6.7333e+06	1.82746e+06	1.12438e+06	3.04512e+06	3.55879e+06	1.53229e+06	1.38908e+07	2.91396e+06	4935225	9.6277e+06	1.25067e+07	3.84775e+06	2.03073e+07	1.08644e+07	1.31323e+06	2.36106e+06	4.31439e+06	1.37518e+07	14737806	1.00779e+07	2.57205e+06	1.56332e+07	4.41671e+06	2.63845e+06	5.48303e+06	5.00597e+06	1.03333e+07	7.98833e+06	4573800	3.06012e+06	4.0543e+06	1.38773e+07	6.50101e+06	4.91155e+06	4.72396e+06	4.88173e+06	1.5119e+06	1.98657e+06	1449684	1.35202e+07	1357523	5.54164e+06	11926515
AT1G51110.1	8.18686e+07	2.581e+07	4.87672e+07	3.13673e+07	10914291	6039362	2.66106e+07	1.90123e+07	27242646	3.0279e+06	3.15748e+06	3.59935e+06	13180506	1.66397e+07	6.49773e+06	8757197	3.31626e+06	4.22906e+06	8.69074e+06	11052989	9379793	6910718	4.08228e+06	8.80711e+06	5.50228e+07	4.15585e+07	4.0548e+06	2.73548e+06	3.12759e+07	20864915	1.08797e+07	1.15314e+07	13782030	6.42281e+06	6674544	3.84511e+06	5720708	5.2712e+06	4.4949e+06	7347845	6861871	9.59858e+06	1.28303e+07	4.95531e+06	6.33192e+06	7.27138e+06	33725732	2.28633e+07
AT1G51160.3	1.05434e+06		415738	254995	1.95485e+06	1.84104e+06	253143	556108	750908	625660	759123	923583	1.96516e+06	1.86323e+06	811380	793020	883751	823373	1.14628e+06	1155414	1.49749e+06	1.59859e+06	832362	766893	896329	1.23865e+06	1.41117e+06	1.10901e+06	1216053	1.24803e+06	1.34374e+06	1.54371e+06	2.15016e+06	1.9402e+06	956107	1.64396e+06	2283850	1850085	1.67706e+06	1245246	1.18803e+06	422871	2.06933e+06	1.22955e+06	2.14757e+06	884404	1302923	1140026
AT1G51360.1	1.396e+06	602410	459001	577202	1.10787e+07	4.07495e+06	906253	3.07344e+06	3951699	3.85514e+06	1.56128e+06	4.274e+06	6.28961e+06	4.17301e+06	1.04212e+06	1.99068e+06	3.00978e+06	3112170	1.7735e+06	4865009	7.57465e+06	6.22183e+06	2.79704e+06	3.87147e+06	1.6196e+06	1.67879e+06	11112416	2782999	1.71129e+06	1206478	1.30327e+07	8593119	19291258	4.13153e+06	3.77788e+06	7.74519e+06	1.7613e+07	13497373	2.81268e+06	3.18593e+06	4660735	2.92117e+06	9138493	7301433	8.26461e+06	6255998	2.45737e+06	7.28265e+06
AT1G51390.1	9043020	5.66712e+06	2862723	5.14761e+06	20846898	21348894	8942671	9410407	11681001	7.09107e+06	8519170	10475364	25370162	20409054	7.89641e+06	10641558	10308394	11250189	13894359	11881106	18005984	17722374	10540345	8520400	10206186	8909081	18060130	16128391	19830580	20832364	15674269	14475977	23635998	22838830	19718168	17052104	31942998	27990054	17724900	15399636	11138323	5.93527e+06	27368208	19871278	16999288	12850718	18066376	12225120
AT1G51570.1	7.2325e+06	3.13958e+06	8640379	5.771e+06	1.38988e+07	1.39618e+07	5.41943e+06	6070100	7.19956e+06	5.23994e+06	6.41427e+06	6852788	1.15314e+07	1.17776e+07	6.86938e+06	6.96799e+06	7.96743e+06	6.67077e+06	6949836	7.50968e+06	9.85039e+06	1.20615e+07	6.23095e+06	6313658	5.96465e+06	4.46485e+06	6.96261e+06	7.11049e+06			8.14919e+06	5.35631e+06	3556298	2.84117e+06	3.08136e+06	1.96322e+06	2.44327e+06	2.44216e+06	1559809	1.19436e+06	5.12733e+06	3.06962e+06	3.42337e+06	8712023	7.01848e+06	7.07024e+06	9.51605e+06	5491229
AT1G51630.1	78131645	4.30321e+07	6.01063e+07	3.99335e+07	6.75135e+07	7.72434e+07	1.12741e+08	103649855	98617325	9.08044e+07	123928905	1.54093e+08	75576753	70739684	7.30824e+07	66169417	57906232	53832916	136980732	1.20091e+08	1.43002e+08	176599953	169735013	1.26182e+08	5.26475e+07	5.36252e+07	5.93961e+07	5.05719e+07	66953290	58730182	9.92601e+07	91043404	1.20002e+08	128604033	114470982	102702073	106986362	86537914	68974474	65644675	6.45054e+07	4.77458e+07	166848829	1.66957e+08	154449518	1.49661e+08	175047683	1.09316e+08
AT1G51650.1	8.99089e+07	1.84412e+07	9.97954e+07	8.01012e+07	36711636	3.8738e+07	2.51036e+07	1.13904e+07	1.90154e+07	1.22704e+07	1.21393e+07	17419826	3.63717e+07	3.56781e+07	1.04658e+07	8.67764e+06	2.09206e+07	2.19339e+07	1.91619e+07	2.59415e+07	3.64833e+07	4.01854e+07	1.61775e+07	1.50803e+07	1.02861e+08	8.54787e+07	31607514	2.91843e+07	2.51851e+07	2.01246e+07	27076812	20402424	42522628	3.14589e+07	2.27297e+07	20863658	5.79816e+07	5.25686e+07	28828938	23985858	1.57767e+07	9.50909e+06	4.2981e+07	2.67859e+07	26577778	1.74615e+07	1.77895e+07	1.57902e+07
AT1G51680.1	2.48679e+08	1.06687e+08	1.80706e+08	1.10983e+08	1.39815e+08	1.3193e+08	1.28324e+08	8.58941e+07	1.28422e+08	9.36073e+07	9.76757e+07	1.06039e+08	1.37445e+08	1.16654e+08	1.10503e+08	8.23947e+07	9.16561e+07	9.41795e+07	1.26647e+08	103832306	1.4921e+08	1.49783e+08	1.37345e+08	1.03746e+08	1.96247e+08	1.89045e+08	113213236	1.09214e+08	1.747e+08	124108526	1.29354e+08	8.72105e+07	1.6151e+08	1.45279e+08	1.35976e+08	1.25246e+08	1.36748e+08	1.07509e+08	1.13956e+08	1.04007e+08	9.88646e+07	6.38042e+07	1.70025e+08	128624158	1.29861e+08	1.08268e+08	2.00547e+08	1.24996e+08
AT1G51690.5	1.0282e+08	6.28005e+07	5.87285e+07	4.44825e+07	5.43397e+07	2.77599e+07	77539385	8.21055e+07	9.09275e+07	8.23134e+07	5.39426e+07	8.5113e+07	1.19286e+08	1.14849e+08	6.1941e+07	7.61156e+07	5.77835e+07	7.43431e+07	83224238	8.93897e+07	6.15879e+07	5.12281e+07	9.80052e+07	83447441	8.09177e+07	8.57019e+07	4.61632e+07	9.3896e+07	6.36838e+07	6.5419e+07	1.08243e+08	9.14156e+07	8.17343e+07	4.40589e+07	6.22238e+07	4.56274e+07	4.23311e+07	3.82334e+07	3.0698e+07	7.8565e+07	3.02481e+07	6.14351e+07	7.81148e+07	5.28153e+07	1.02489e+08	1.11596e+08	7.92836e+07	9.54508e+07
AT1G51710.1	1.09841e+08	7.1555e+07	7.45421e+07	6.41085e+07	1.49841e+08	1.45172e+08	1.00713e+08	1.05099e+08	1.23773e+08	1.08247e+08	1.35295e+08	1.43429e+08	1.64698e+08	1.4966e+08	1.10826e+08	1.02284e+08	1.16629e+08	1.19589e+08	1.31121e+08	1.1858e+08	1.69981e+08	1.68924e+08	1.45132e+08	1.2881e+08	9.70159e+07	8.76952e+07	1.18924e+08	1.08793e+08	1.24256e+08	1.13508e+08	1.08204e+08	1.04215e+08	1.37377e+08	1.33036e+08	1.62616e+08	1.51357e+08	1.57361e+08	1.54176e+08	1.09232e+08	1.09134e+08	1.13336e+08	8.2411e+07	1.94798e+08	1.42112e+08	1.33462e+08	1.25323e+08	2.06143e+08	1.30434e+08
AT1G51730.1	2.81077e+07	1.42641e+07	2.26513e+07	1.73244e+07	41997678	41488692	1.92341e+07	21638480	2.31302e+07	21291209	23991300	32978940	4.02228e+07	3.44738e+07	3.29622e+07	2.6345e+07	24014605	1.55965e+07	29194264	2.54168e+07	3.60186e+07	3.57524e+07	3.4281e+07	2.35662e+07	2.86769e+07	2.59362e+07	3.27758e+07	3.05001e+07	3.42983e+07	2.73927e+07	3.90672e+07	3.36256e+07	4.68981e+07	4.43871e+07	3.15019e+07	3.18106e+07	4.81502e+07	4.01846e+07	3.7643e+07	3.20398e+07	1.2509e+07	2.239e+07	55036607	37801122	3.88247e+07	3.54048e+07	6.20006e+07	3.12147e+07
AT1G51760.1	1.18293e+07	3.26787e+06	7.49118e+06	1.72053e+06	5.70782e+06	4.43788e+06	3.42718e+06	4.1541e+06	5.71394e+06	4.39492e+06	4.89147e+06	4.10445e+06	4.88908e+06	3.61498e+06	3.19283e+06	2.15959e+06	5.08959e+06	2.28984e+06	6.2762e+06	3.64297e+06	7.28521e+06	7.42838e+06	7.66895e+06	4.13636e+06	3.54751e+06	6.50325e+06	7.4212e+06	3.17629e+06	6.28574e+06	5988609	8.78619e+06	9.23957e+06	1.41044e+07	9.9211e+06	1.26872e+07	1.06236e+07	7.7679e+06	6.20194e+06	7.87092e+06	7.06146e+06	6.01966e+06	3.38718e+06	1.08414e+07	8.04096e+06	9.33345e+06	5.18942e+06	1.39215e+07	8.46566e+06
AT1G51800.1	25947691	1.11057e+07	7.19743e+06	8.35188e+06	20008372	2.46565e+07	1.63791e+07	1.51808e+07	1.97808e+07	13842934	1.72327e+07	21422392	17790536	18005614	1.83242e+07	1.7594e+07	11217913	1.88052e+07	2.4903e+07	21803325	2.6229e+07	2.20245e+07	1.80407e+07	1.77216e+07	1.27061e+07	12072586	15600496	14585349	2.73515e+07	1.3622e+07	13260017	11263924	19044502	1.99916e+07	10526821	14797059	24113754	2.63018e+07	13496854	1.61564e+07	13612376	10860732	2.71319e+07	17553724	14263148	20711513	14390386	9179187
AT1G51980.1	1.0542e+09	4.3964e+08	6.50478e+08	3.72957e+08	5.49162e+08	5.0483e+08	5.58076e+08	5.23619e+08	5.89047e+08	4.74268e+08	4.37038e+08	5.75346e+08	7.1648e+08	6.33968e+08	4.73016e+08	4.39222e+08	4.42844e+08	4.86744e+08	6.39451e+08	5.42899e+08	5.73311e+08	6.72892e+08	6.77694e+08	5.40821e+08	8.17307e+08	7.09588e+08	5.29792e+08	5.20968e+08	8.89038e+08	7.22244e+08	5.59095e+08	4.92925e+08	6.46601e+08	6.18126e+08	5.3492e+08	5.08524e+08	7.14764e+08	6.53367e+08	5.2159e+08	5.04749e+08	4.70982e+08	4.27295e+08	7.63109e+08	6.68545e+08	6.38602e+08	5.82483e+08	8.83444e+08	5.86738e+08
AT1G52100.1	1.81287e+08	7.83908e+07	1.18747e+08	8.31384e+07	1.00233e+08	9.81864e+07	2.43504e+08	2.01653e+08	2.2605e+08	1.75301e+08	2.13201e+08	2.00094e+08	8.60801e+07	6.92942e+07	1.07376e+08	9.60952e+07	8.63263e+07	5.95172e+07	2.42915e+08	2.03891e+08	3.04709e+08	2.85648e+08	3.28356e+08	2.43469e+08	1.47992e+08	1.45585e+08	8.28286e+07	6.49476e+07	5.75638e+07	4.61165e+07	3.04813e+08	2.85904e+08	2.99182e+08	2.96463e+08	3.42605e+08	2.97086e+08	1.56274e+08	1.05763e+08	9.56492e+07	7.88414e+07	1.07935e+08	7.17626e+07	2.99872e+08	2.4112e+08	3.07107e+08	2.44109e+08	4.28032e+08	2.42743e+08
AT1G52230.1	2.13636e+08	8.11898e+07	9.86242e+07	8.4514e+07	3.01444e+08	3.01965e+08	9.0428e+07	1.11004e+08	1.1427e+08	7.77664e+07	8.81746e+07	9.92049e+07	2.96649e+08	2.35177e+08	9.71202e+07	1.05338e+08	1.00714e+08	9.49544e+07	1.53421e+08	1.43293e+08	204278044	2.00522e+08	1.20298e+08	1.0288e+08	1.26139e+08	99594449	1.83511e+08	1.48675e+08	2.15453e+08	1.77089e+08	187972664	1.70785e+08	2.6639e+08	232973148	2.31722e+08	1.93401e+08	3.54297e+08	2.91029e+08	1.98128e+08	1.61658e+08	1.76892e+08	8.47421e+07	3.04942e+08	1.991e+08	1.5863e+08	1.04426e+08	1.97033e+08	1.41607e+08
AT1G52340.1	6.26686e+07	1.60937e+07	2.91281e+07	16214681	2.09567e+07	25023670	1.92736e+07	2.08381e+07	2.37398e+07	1.95073e+07	2.37439e+07	2.20693e+07	2.12387e+07	2.02876e+07	25640669	1.69778e+07	2.26477e+07	1.94445e+07	2.62235e+07	2.15421e+07	28072650	2.77531e+07	24294834	23233214	1.65777e+07	12181989	2.1551e+07	1.49889e+07	1.82672e+07	9.88785e+06	2.51564e+07	2.23328e+07	25326282	2.44254e+07	2.79965e+07	32210413	6154995	5.55483e+06	2.51996e+07	1.66704e+07	2.01523e+07	1.66366e+07	29014267	2.66734e+07	25471511	2.09814e+07	2.62354e+07	1.74563e+07
AT1G52360.2	6.24957e+07	23105548	2.94423e+07	1.35708e+07	2.21453e+07	3.15061e+07	2.94078e+07	2.29843e+07	2.95569e+07	2.37398e+07	3.60352e+07	3.49969e+07	2.38349e+07	2.44432e+07	1.34367e+07	12091378	3.83634e+07	2.53062e+07	2.5798e+07	1.82745e+07	34305228	2.61566e+07	3.94437e+07	2.28993e+07	2.61226e+07	1.4592e+07	2.92555e+07	3.27233e+07	3.43633e+07	2.7834e+07	2.26122e+07	3.03158e+07	3.9856e+07	3.61144e+07	3.05697e+07	3.4852e+07	5.16307e+07	3.95182e+07	32717888	2.93358e+07	2.12993e+07	2.21424e+07	4.14584e+07	2.33395e+07	3.61029e+07	2.66733e+07	54725780	3.72005e+07
AT1G52380.3	2.92715e+07	1.23508e+07	1.68758e+07	1.13255e+07	3.78275e+07	3.94717e+07	1.61593e+07	1.82364e+07	1.98898e+07	1.89553e+07	2.72175e+07	2.47615e+07	4.21826e+07	4.00364e+07	2.58043e+07	2.17513e+07	2.01005e+07	1.78148e+07	2.37335e+07	18830106	36498799	3.41406e+07	2.65295e+07	1.6811e+07	16997721	1.50822e+07	2.79453e+07	2.59683e+07	3.36512e+07	2.71136e+07	2.10581e+07	16734965	2.57887e+07	2.39147e+07	1.67628e+07	1.87348e+07	3.95639e+07	3.09421e+07	2.45361e+07	2.42206e+07	2.02714e+07	1.4044e+07	2.9191e+07	2.16596e+07	2.02555e+07	1.79879e+07	3.36326e+07	1.74149e+07
AT1G52400.3	1.03339e+07	7059431	5.24475e+06	779212	1.34828e+07	1.36505e+07	5483387	6.08295e+06	3002375	4.64899e+06	4183020	4407850	1.27241e+07	1.32642e+07	2.13293e+06	1.22885e+06	5223660	5772640	5.36075e+06	4.81222e+06	8897438	9365683	5.47472e+06	5511069	8.87911e+06	9015177	10628555	8544065	1.12231e+07	1.05566e+07	1.00959e+07	8429940	11400871	11981231	6.11995e+06	6186790	20388564	1.84445e+07	9281680	7.88132e+06	9444912	8.07607e+06	9962460	7.99677e+06	8722218		8838996	5.64638e+06
AT1G52410.2	37553762	7.11388e+06	11380333	6.04014e+06	2.5256e+07	2.47133e+07	12502713	9799707	9806466	9203046	13995665	11728936	13538868	17031402	14248295	8663877	1.98805e+07	13408055	11661374	10998778	18787772	1.59203e+07	14347342	9822481	10125114	8599822	1.73551e+07	10110673	12529255	8.09107e+06	11800294	13098495	19845182	1.99883e+07	17847588	1.90255e+07	38011879	2.40764e+07	2.22811e+07	14792086	2.37332e+07	1.45292e+07	24151392	19799408	15595761	12127017	16145860	8585402
AT1G52560.1	736511	657280	311763	591716	1.7029e+06	1.22019e+06	680081	448394	432719	456131	457935	445991	1.71292e+06	1.63835e+06	493888	633857	596872	585170	823082	736443	886933	609914	592570	656993	1.47129e+07	1.26259e+07	2.27569e+06	1.89676e+06	5824888	5.22253e+06	3.79833e+06	5.75656e+06	3.43575e+06	2.93699e+06	3.76869e+06	2.84444e+06	23786543	21629321	5.04196e+06	4.1886e+06	1.7683e+06	581388	24929945	16536832	3.51073e+06	1.94379e+06	1.12059e+07	7124580
AT1G52600.1	20615575	5.98955e+06	1.94288e+07	5.39026e+06	11196580	13897614	1.07438e+07	12665501	9.98034e+06	8878553	11747846	9333581	1.05209e+07	7.3862e+06	10741843	5.33871e+06	8.86009e+06	7.89895e+06	1.14286e+07	7.48921e+06	15026684	10737129	1.38017e+07	1.16719e+07	9024366	6.31504e+06	6435853	6.63656e+06	10065899	5.88678e+06	7.43917e+06	9571052	9.50774e+06	9438404	1.56368e+07	9.08809e+06	1.14775e+07	1.34365e+07	6.03011e+06	8.91654e+06	6242036	7.12152e+06	1.19313e+07	1.08975e+07	10487933	7.36127e+06	1.49521e+07	6.20182e+06
AT1G52670.1	2.21718e+08	6.86624e+07	1.02131e+08	6.37462e+07	2.33487e+07	303310	6.16759e+07	9.17789e+07	9.53274e+07	1.08184e+08	5.03594e+07	8.952e+07	1.78857e+08	1.6753e+08	7.51506e+07	9.31556e+07	6.87032e+07	1.09614e+08	9.23505e+07	1.0556e+08	4.44222e+07	1.97711e+07	1.03725e+08	8.90692e+07	7.04647e+07	5.85621e+07	146151	9.10961e+07	1.4899e+08	8.98913e+07	1.07364e+08	7.33765e+07	134977	116759	228580	114763	282308	187989	270234	6.47444e+07	4.18205e+07	7.88546e+07	12247.1		6.84723e+07	8.78738e+07	9.89161e+07	6.76769e+07
AT1G52690.1	33745593	6.15293e+06				2014306	8.45957e+06	8382172	4448567	2.58369e+06	8062694	6960416	584614	2.84689e+06	690637		1200071	3.15376e+06	1.00058e+07	6.88542e+06	8943348	6.57671e+06	2.71966e+07	15033342	4.50948e+06		1900986	4136631	6.01443e+06	761551	9.47029e+06	8207649	9671531	9530676	11916932	11822865			1.77941e+06			1.50052e+06	9.33498e+06	6.17815e+06	4.63615e+06	4.32023e+06	23130361	6.87945e+06
AT1G52730.2	114148174	2.19598e+07	2.92763e+07	1.8609e+07	3.83599e+07	3.70947e+07	2.46014e+07	2.21903e+07	2.69452e+07	1.92838e+07	2.03696e+07	1.92414e+07	4.00677e+07	3.91569e+07	1.90088e+07	1.96879e+07	1.80387e+07	2.14872e+07	2.79441e+07	2.00652e+07	3.98338e+07	3.25325e+07	2.72761e+07	1.64761e+07	2.84159e+07	2.95898e+07	1.93055e+07	1.80223e+07	4.27051e+07	2.91052e+07	2.62663e+07	2.77554e+07	3.96097e+07	3.27924e+07	4.90881e+07	3.70216e+07	46157692	4.15213e+07	2.84391e+07	2.24522e+07	2.57126e+07	1.27741e+07	4.66104e+07	2.97696e+07	2.23245e+07	1.6916e+07	5.94818e+07	3.82262e+07
AT1G52740.1	1.49469e+06	1.31867e+06	1.40152e+06	1.39113e+06	3.28995e+06	2.7185e+06	2.94862e+06	3.49855e+06	1.92619e+06	2719360	2.45251e+06	2.16902e+06	2.38545e+06	1.873e+06	2.09169e+06	1.86876e+06	3.07435e+06	1.95326e+06	3.07732e+06	3.23255e+06	4.41073e+06	2430951	1.86972e+06	1.26737e+06	1449190	1.05423e+06	1.18935e+06	1.29999e+06			898160	1.201e+06	1.77327e+06	1.37952e+06			1.28753e+06	1.14924e+06	915031	1.49447e+06	1.47973e+06	1.67693e+06	1.53707e+06	1.72002e+06	1.37406e+06	1.59507e+06	750474
AT1G52760.1	5.26589e+07	1.13422e+07	1.98531e+07	9.39617e+06	2.48652e+07	2.56098e+07	2.20632e+07	2.40096e+07	1.81327e+07	1.76953e+07	2.48979e+07	2.89023e+07	3.396e+07	2.34366e+07	2.24103e+07	2.02292e+07	2.49326e+07	2.28991e+07	3.49621e+07	2.6802e+07	3.34449e+07	3.73781e+07	3.82474e+07	3.10679e+07	1.42259e+07	1.26384e+07	2.81126e+07	1.89497e+07	3.10475e+07	2.31738e+07	2.91277e+07	2.44542e+07	4.00768e+07	3.84211e+07	4.41224e+07	3.77434e+07	3.78e+07	3.40817e+07	2.76272e+07	2.32414e+07	2.50174e+07	1.70089e+07	5.42664e+07	3.9039e+07	3.80467e+07	2.37425e+07	4.56916e+07	2.65591e+07
AT1G52780.1	7646993	5.82613e+06	7.11711e+06	3.17553e+06	1.5905e+07	1.52798e+07	6.04019e+06	7.40385e+06	8.6589e+06	6.82623e+06	9.37166e+06	8.89948e+06	9964515	1.13309e+07	6.73617e+06	4.78952e+06	7.54392e+06	7.01688e+06	8.3282e+06	6.04649e+06	9.04099e+06	8.41259e+06	7.69702e+06	9.2702e+06	6.78871e+06	6.04928e+06	7.31299e+06	4.48665e+06	9.91186e+06	5.74902e+06	7.59447e+06	8.63279e+06	9152159	9.59228e+06	8.74365e+06	9154263	14222770	8221507	7.10976e+06	5.06629e+06	8.87052e+06	4.43513e+06	9.03841e+06	9.01363e+06	8639349	5.83952e+06	14249462	6181882
AT1G53210.1	9422948	8.6812e+06	2.60053e+07	1.31497e+07	1.2622e+07	13731889	7.41338e+06	1.03803e+07	1.33298e+07	1.6798e+07	7912682	7.79082e+06	1.25677e+07	8.90774e+06	1.835e+07	6.0243e+06	1.41973e+07	7.6312e+06	1.72021e+07	1.30648e+07	1.19279e+07	1.06791e+07	1.58634e+07	1.52937e+07	4462509	4.33088e+06	1.11286e+07	1.18116e+07	6.53531e+06	6017231	4.10405e+07	1.11441e+07	1.64884e+07	1.11176e+07	1.81346e+07	1.69342e+07	2.20349e+07	1.61886e+07	1.66748e+07	2.82697e+07	1.89257e+07	1.45479e+07	1.57816e+07	1.01366e+07	1.65588e+07	6.6076e+06	8.71979e+06	1.11654e+07
AT1G53240.1	2.46665e+08	1.34811e+08	1.72207e+08	1.41072e+08	4.17269e+08	4.10861e+08	1.75398e+08	1.87876e+08	2.02012e+08	1.96334e+08	2.13739e+08	2.43803e+08	4.21901e+08	3.90035e+08	2.14506e+08	1.8757e+08	2.2489e+08	2.19893e+08	2.63558e+08	2.77778e+08	4.36016e+08	4.36178e+08	2.8827e+08	2.4061e+08	2.18526e+08	2.03828e+08	3.38534e+08	2.8745e+08	5.80171e+08	4.51244e+08	3.33831e+08	3.03977e+08	4.70598e+08	4.41088e+08	3.56972e+08	3.32883e+08	5.64536e+08	4.87142e+08	3.62283e+08	3.14562e+08	2.49643e+08	1.65675e+08	4.9232e+08	3.51189e+08	3.68644e+08	2.88914e+08	3.73493e+08	2.88462e+08
AT1G53280.1	1.34288e+08	3.66202e+07	1.10462e+08	5.99468e+07	1.3608e+07	1.60626e+07	4.51922e+07	2.9644e+07	6.2969e+07	3.33217e+07	2.63704e+07	2.55869e+07	3.24432e+07	1.17016e+07	2.03899e+07	2.07288e+07	2.48633e+07	2.8568e+07	2.85716e+07	1.67487e+07	1.55291e+07	2.18019e+07	3.73119e+07	2.61913e+07	1.11728e+08	8.92555e+07	2.43141e+07	1.63831e+07	1.00838e+08	64423304	2.02031e+07	2.23774e+07	2.90217e+07	2.83497e+07	3.09047e+07	2.76584e+07	3.19465e+07	2.76879e+07	1.89567e+07	1.6706e+07	2.92044e+07	2.09114e+07	3.28324e+07	2.32928e+07	2.65152e+07	2.00352e+07	8.47186e+07	30095862
AT1G53310.1	8.34163e+08	3.62357e+08	4.41544e+08	2.68295e+08	5.9979e+08	4.87851e+08	5.31697e+08	5.42985e+08	5.31008e+08	4.9121e+08	5.04077e+08	5.94561e+08	6.9322e+08	5.97825e+08	4.10225e+08	4.53689e+08	3.71387e+08	3.81967e+08	6.51941e+08	6.52004e+08	7.17929e+08	6.55076e+08	7.26661e+08	6.22632e+08	4.9302e+08	4.2739e+08	4.25306e+08	5.257e+08	6.65239e+08	5.1078e+08	6.70431e+08	5.37131e+08	7.0864e+08	5.52566e+08	5.99776e+08	4.84368e+08	6.54914e+08	5.45897e+08	4.51965e+08	4.3343e+08	4.06089e+08	3.44476e+08	6.73016e+08	4.54108e+08	5.37988e+08	4.81744e+08	8.75863e+08	6.57325e+08
AT1G53500.1	1.40229e+08	7.13862e+07	1.43064e+08	7.56687e+07	8.44959e+07	7.18136e+07	9.34751e+07	8.34468e+07	1.00408e+08	7.66157e+07	7.55504e+07	8.70068e+07	1.08522e+08	1.01501e+08	8.17009e+07	7.37685e+07	7.20098e+07	7.02028e+07	9.49833e+07	8.54297e+07	1.0145e+08	8.2727e+07	1.07081e+08	7.96185e+07	104300875	1.06991e+08	6.79193e+07	7.29185e+07	81057448	7.7933e+07	9.55366e+07	6.61255e+07	8.09224e+07	6.53598e+07	1.82194e+07	43858102	2.22788e+07	6.63025e+07	4.21414e+07	6.09167e+07	4.78588e+07	5.39881e+07	8.45255e+07	5.57415e+07	9.60625e+07	8.10652e+07	7.78906e+07	8.96796e+07
AT1G53520.1	8.35784e+07	4.60375e+07	1.47049e+08	9.22768e+07	5.1014e+07	51736384	4.20268e+07	3.74111e+07	4.96203e+07	2.70088e+07	3.09737e+07	3.64418e+07	5.60049e+07	4.88244e+07	3.89701e+07	3.68447e+07	2.62759e+07	2.80393e+07	3.06693e+07	2.82494e+07	4.26995e+07	4.28216e+07	2.65408e+07	2.45914e+07	8.25001e+07	6.28894e+07	4.26017e+07	3.80719e+07	5.23696e+07	4.55945e+07	3.25379e+07	2.75809e+07	3.85166e+07	3.52747e+07	2.82815e+07	2.6835e+07	6.1368e+07	5.88523e+07	3.16819e+07	3.32094e+07	2.94832e+07	1.4038e+07	3.89864e+07	3.13685e+07	2.90934e+07	2.65945e+07	5.27082e+07	3.23585e+07
AT1G53580.1	1.0281e+08	4.66743e+07	7.34756e+07	2.78198e+07	1.4862e+08	1.52075e+08	8.1421e+07	3.79231e+07	5.61909e+07	4.6502e+07	4.84782e+07	4.67705e+07	6.82088e+07	1.22681e+08	3.86668e+07	3.80905e+07	8.9575e+07	5.23215e+07	5.76791e+07	5.02412e+07	1.67901e+08	1.69234e+08	5.85751e+07	5.1881e+07	8.15578e+07	3.55193e+07	117719037	1.09375e+08	1.57432e+08	1.2345e+08	137753314	1.14104e+08	1.51723e+08	1.47899e+08	1.03999e+08	1.13914e+08	1.44466e+08	1.27905e+08	97278818	97490959	8.97592e+07	6.27806e+07	6.51608e+07	4.88129e+07	1.27977e+08	4.73868e+07	1.64941e+08	9.22631e+07
AT1G53645.1	8.15947e+06				7167001	8402913	3.48618e+06	4173003	3.13493e+06	3.94965e+06	5.11033e+06	6.28328e+06	4.67422e+06	3.36674e+06	4.35059e+06	3.43304e+06	4.55108e+06	2.92637e+06	3.93151e+06	4.52413e+06	6550189	6667635	319351	2.95642e+06	3645466	1.08457e+06	3.95519e+06	3.42233e+06	5.04071e+06	2.39346e+06	3.31399e+06	2947711	4.1034e+06	3550608	6210333	5557959	7.79713e+06		4.77089e+06	3.78284e+06	6871187	4.22077e+06	5.4596e+06	5.09738e+06	2.99168e+06	1.71007e+06	9006615	3.3935e+06
AT1G53670.1	3.88863e+06	1.31313e+06	2.30645e+06	1619899	3.0687e+06	2.69691e+06	1.42199e+06	1.68302e+06	1.65354e+06	1.99906e+06	2.0955e+06	2.47182e+06	4.35247e+06	2.71035e+06	3.59112e+06	2.50149e+06	2.00162e+06	2.75754e+06	1.91562e+06	2.16149e+06	2481590	2283928	2.52605e+06	1.47197e+06	1.4378e+06	1.12411e+06	2.05223e+06	1.6134e+06	3.0013e+06	1.0086e+06	2200555	1.96574e+06	1.68719e+06	1.31641e+06	1.66371e+06	2.14687e+06	2767846	3.43975e+06	2.97302e+06	1.7525e+06	2.80754e+06	1.95069e+06	1.96547e+06	1.60198e+06	1.5566e+06	695694	2.93341e+06	349643
AT1G53750.1	5.75572e+08	1.80358e+08	3.19433e+08	1.58618e+08	3.02142e+08	3.06357e+08	2.40776e+08	2.38725e+08	3.04909e+08	2.67032e+08	2.92865e+08	3.19127e+08	3.2269e+08	2.82843e+08	3.02133e+08	2.46543e+08	3.00757e+08	2.72754e+08	3.31989e+08	2.87531e+08	3.25946e+08	3.5617e+08	3.55973e+08	2.82236e+08	2.91581e+08	2.60637e+08	2.85746e+08	2.38665e+08	3.50283e+08	2.47423e+08	2.90285e+08	2.61587e+08	3.41605e+08	3.361e+08	3.40592e+08	2.99538e+08	2.72224e+08	3.08438e+08	2.85955e+08	2.39205e+08	3.21662e+08	2.2568e+08	3.74623e+08	3.07557e+08	3.2479e+08	2.70745e+08	5.27946e+08	2.77344e+08
AT1G53760.1		11450.2	424102		90451.2	59006			23558		79703.3	172758	88238.4	61636.3	44567.6		130048	127911	45256.3	22433.4	29531.7	30833.8	480836	252326			52108.5	34533.8		89356.4	220455	92363.5	145684	98523	95267.7	17640.4	470832	161523	231682	87361.7	53276.7	40341.7	86350.8	26390.3	38318	12701.8	578632	41428
AT1G53830.1	20727006		5.65011e+06	1.89052e+06		8.30927e+06	780802		4.52664e+06	564061	1.3407e+06		5.65631e+06			6781518	1.63967e+06			3554339	8.1199e+06	3.76664e+06	3.47789e+06		16106378								8.18159e+06		1.89542e+06	2.58264e+06				10222162
AT1G53850.2	161134	162746	151238	175846	306948	340428	245729	289468	206823	202291	299445	270350	369110	393614	234436	220601	234217	219030	362513	393701	494523	449164	361938	351622	439453	453478	494657	512193	199186	227692	502793	611597	641718	673911	465052	494651	740249	706736	492034	455555	262100	212430	910506	644124	714103	608261	356572	344143
AT1G54000.1	4838851	4.18919e+06	2.78982e+06	1.31656e+06	8.94572e+06	8.98537e+06	3.02493e+06	3.35294e+06	3.36043e+06	5.06811e+06	3.35717e+06	3.77612e+06	6625416	8.35983e+06	3.85625e+06	2.72851e+06	4.65612e+06	5.02684e+06	6.14212e+06	6246965	6.79562e+06	7.22848e+06	4.4759e+06	4191303	7083623	4.84046e+06	6.16618e+06	7.2159e+06	4891230	4.18749e+06	4.39011e+06	4.85583e+06	7.7085e+06	8.26303e+06	7.61978e+06	6.41826e+06	8.00017e+06	7.40346e+06	5729103	5.79113e+06	7.28638e+06	4.46116e+06	1.14855e+07	7.0268e+06	5.45935e+06	4.26431e+06	5.58242e+06	6594973
AT1G54010.1	1.69684e+07	1.3661e+07	9.8614e+06	1.14387e+07	4.45905e+07	5.11551e+07	1.57159e+07	1.74255e+07	2.05526e+07	1.9847e+07	1.55853e+07	1.91596e+07	3.08113e+07	2.83707e+07	1.64586e+07	1.03658e+07	1.67249e+07	1.26512e+07	1.83063e+07	2.26246e+07	3.15607e+07	2.93119e+07	2.64661e+07	2.5645e+07	1.87902e+07	1.82744e+07	2.46807e+07	2.78383e+07	2.89297e+07	2.23755e+07	3.87496e+07	3.42067e+07	5.63646e+07	5.27127e+07	3.59705e+07	3.53691e+07	5.20518e+07	4.16392e+07	2.65565e+07	2.93854e+07	2.9077e+07	1.98608e+07	5.58595e+07	3.83052e+07	3.96088e+07	3.2871e+07	4.82262e+07	2.81983e+07
AT1G54050.2			12604.8		2377191				1.99982e+06					2.55082e+06			1.39126e+06	770694	1.37249e+06		3.13396e+06			2.12521e+06	1.44779e+08	1.33284e+08	3.33915e+07	29740476	5.24326e+07	5.45703e+07	5.97309e+07	4.63102e+07	24168902	23395364	2.46423e+07	2.9506e+07	1.52449e+08	1.65882e+08	5.95841e+07	6.30189e+07	2.20584e+07	1.44502e+07	1.45093e+08	1.12197e+08	3.64976e+07	3.05948e+07	7.5448e+07	4.10977e+07
AT1G54100.2	4.57069e+08	1.88653e+08	2.85776e+08	1.2011e+08	2.71996e+08	2.30621e+08	2.89686e+08	2.60964e+08	3.14519e+08	2.38572e+08	2.14248e+08	3.05416e+08	2.26287e+08	1.97673e+08	1.9459e+08	1.91272e+08	1.80867e+08	1.85445e+08	3.49013e+08	2.9543e+08	3.78105e+08	3.79308e+08	4.04673e+08	3.22941e+08	2.7398e+08	2.86767e+08	2.57292e+08	1.97979e+08	3.02193e+08	2.4562e+08	3.68556e+08	2.85978e+08	3.97478e+08	4.07678e+08	4.01515e+08	3.58997e+08	2.01351e+08	2.2042e+08	2.9217e+08	2.4662e+08	2.12962e+08	1.71391e+08	4.46044e+08	3.65351e+08	3.97015e+08	2.89498e+08	4.47195e+08	3.26657e+08
AT1G54220.1	1.72767e+07	1.76023e+07	1.39217e+07	12922418	36027019	3.40718e+07	2.10985e+07	2.283e+07	2.22524e+07	2.01172e+07	2.62267e+07	2.64663e+07	3.4789e+07	3.10016e+07	2.46328e+07	2.02694e+07	2.49716e+07	2.37672e+07	2.83439e+07	2.83862e+07	3.67179e+07	4.04499e+07	3.43818e+07	2.63379e+07	1.86684e+07	1.48305e+07	2.42068e+07	2.36885e+07	4.44741e+07	3.29091e+07	2.82131e+07	2.2134e+07	3.46141e+07	3.1876e+07	2.98955e+07	2.88934e+07	4.82827e+07	3.60666e+07	2.35929e+07	2.34437e+07	2.02791e+07	1.4585e+07	4.0376e+07	27867130	2.84205e+07	2.47351e+07	43869645	2.3174e+07
AT1G54270.1	1.02431e+08	7.34075e+07	1.31235e+08	1.04555e+08	2.14461e+08	2.10732e+08	1.20913e+08	1.31413e+08	1.55564e+08	1.78167e+08	1.28373e+08	2.29717e+08	2.32866e+08	2.21599e+08	1.74821e+08	1.4748e+08	1.04779e+08	1.22726e+08	1.287e+08	1.24865e+08	1.84727e+08	2.04181e+08	1.63305e+08	1.29463e+08	1.16237e+08	1.18742e+08	184344770	1.78343e+08	1.86226e+08	1.82152e+08	1.71375e+08	1.45573e+08	2.47461e+08	2.40577e+08	1.53793e+08	1.64838e+08	2.68999e+08	2.72012e+08	1.65863e+08	1.72377e+08	1.28141e+08	9.48552e+07	3.21804e+08	238439594	2.16556e+08	1.86825e+08	2.65475e+08	1.79308e+08
AT1G54290.1	1.1428e+07	6.43337e+06	5.89656e+06	9.04643e+06	20240577	2.07317e+07	9.75817e+06	9.16646e+06	1.10923e+07	8.53798e+06	8.98635e+06	1.08986e+07	1.92224e+07	1.79121e+07	1.1084e+07	1.2773e+07	8.85556e+06	9817954	1.31072e+07	1.19222e+07	1.70239e+07	1.72459e+07	1.20611e+07	1.01079e+07	9.13551e+06	7.66361e+06	1.70949e+07	1.47311e+07	11282714	1.01429e+07	1.61637e+07	1.60893e+07	1.94979e+07	1.74949e+07	20384890	1.75763e+07	2.62772e+07	24413545	15750533	1.32316e+07	1.38322e+07	7.10285e+06	23060394	13552738	1.70489e+07	1.07524e+07	1.94356e+07	1.40502e+07
AT1G54320.1	21755050	1.82648e+07	13134519	1.06644e+07	23942086	18481380	3.09828e+06	2.19778e+07	2.03503e+07	1.32457e+07	13213153	1.4869e+07	10614573	35006484	2.0979e+07	20461077	2.14388e+07		3442785	26631307	6586508	5.61323e+06	5.58438e+06	20383530	2.99319e+07	2.95372e+07	18793842	5.40891e+06	22617082	5573455	9.80875e+06	7.94104e+06	8.04435e+06		5.80996e+06	2.94208e+06	28499840	2.5498e+07	655531	2.68561e+07	2.92694e+07	2.41198e+07	1164607	2.95361e+06	24919028	2.38653e+07	1.71976e+06	4.63804e+06
AT1G54410.1	8.58139e+08	381897296	1.14665e+09	7.27744e+08		3802.97	331637968	53027318	238244728	26720.3	4003.69	10459.8	7.62553e+06	2.04959e+06	3.24952e+06	5.10622e+06	20607.5	7145.99	2.55685e+07	9643.82	1385.3		1.13155e+07		594716464	528524136		6.90455e+06	89489228	51752175	3159.38														6.23292e+06		137233616	1.41854e+08
AT1G54570.1		196397	154177	107032	1.58534e+07	6.72771e+06	348759	5.37741e+06	8.87619e+06	6.91333e+06	3.41188e+06	1.05934e+07	8064950	1.28958e+07	1.03176e+07	7.60631e+06	5.52157e+06	5.32889e+06	1.07299e+07	8.61137e+06	1.24343e+07	9.50369e+06	1.19814e+07	9.88794e+06	1.03383e+07	1.21415e+07	7218092	10913020	10585579	8566892	8.17877e+06	7.79857e+06	1.04711e+07	1.04868e+07	7.98015e+06	1.37863e+07	1.20296e+07	1.19229e+07	8.75543e+06	1.05459e+07	8.56463e+06	7.17062e+06	1.18866e+07	1.4525e+07	1.25167e+07	8.13525e+06	1.50849e+07	1.79527e+07
AT1G54580.1	6.28555e+06	7.31929e+06	7.77701e+06	6.9688e+06	1.71891e+07	1.79245e+07	7.71765e+06	9.13984e+06	8.04379e+06	8.07018e+06	1.31069e+07	1.32009e+07	1.39236e+07	1.17147e+07	1.35474e+07	1.12009e+07	1.13095e+07	1.14676e+07	1.02872e+07	9.09355e+06	1.51701e+07	1.52827e+07	1.01567e+07	1.05899e+07	1.71759e+07	1.58884e+07	1.80433e+07	1.81613e+07	6.84054e+06	8.187e+06	1.72142e+07	1.81958e+07	1.92412e+07	17314798	1.28496e+07	1.34093e+07	2.53567e+07	2.41096e+07	1.97539e+07	1.92787e+07	1.499e+07	9.97221e+06	22063080	1.91736e+07	1.71535e+07	1.62026e+07	1.2772e+07	1.40881e+07
AT1G54630.1	1.01682e+07	6.86755e+06	1.2528e+07	8.94425e+06	1.78938e+07	1.87306e+07	7.51915e+06	8.60359e+06	7.87036e+06	8.84406e+06	1.24431e+07	1.3057e+07	1.18725e+07	1.12794e+07	1.72302e+07	1.33262e+07	8.58446e+06	9.6635e+06	1.03581e+07	9.92338e+06	1.34599e+07	1.33428e+07	1.06794e+07	1.14548e+07	2.11703e+07	1.92006e+07	2.29009e+07	2.05967e+07	6.5887e+06	6.91007e+06	2.39814e+07	2.45111e+07	2.15506e+07	2.29758e+07	1.8429e+07	1.67621e+07	2.88864e+07	2.7757e+07	2.5358e+07	2.53707e+07	2.43114e+07	1.65622e+07	2.34126e+07	2.17021e+07	1.98858e+07	1.73098e+07	1.74146e+07	1.48413e+07
AT1G54780.1	1.0609e+08	8.58769e+07	1.08936e+08	9.46417e+07	3.33996e+08	3.35286e+08	1.29174e+08	1.40365e+08	1.41422e+08	1.49173e+08	1.19936e+08	147501677	2.97334e+08	2.81353e+08	1.48372e+08	1.19652e+08	1.08613e+08	1.10614e+08	1.80818e+08	1.66619e+08	2.65628e+08	270329900	1.99725e+08	1.01881e+08	1.53007e+08	1.16957e+08	2.0015e+08	1.88637e+08	2.38127e+08	2.27457e+08	1.85646e+08	1.38944e+08	2.53427e+08	2.44037e+08	1.19743e+08	1.24648e+08	2.79289e+08	2.27777e+08	1.52911e+08	1.61392e+08	1.18807e+08	1.07372e+08	3.19149e+08	2.31685e+08	1.24284e+08	9.76646e+07	1.62652e+08	9.31015e+07
AT1G54860.1	3457421	475416	294894	600661	3.12808e+06	2.47715e+06	698780		1.36321e+06	3.268e+06	1.53897e+06	1.77778e+06	2.35188e+06	1.66792e+06		945744	2.74809e+06	2.42802e+06	5.83942e+06	3.72046e+06	3.81945e+06	5916987	6.78023e+06	2.27024e+06	1.99148e+06	661022	1.66425e+06	1.28381e+06	1.70619e+06	1.30028e+06	3268660	1.57737e+06	6.40091e+06	5.28649e+06	2.77476e+06	4.37753e+06	3.62983e+06	3.35083e+06	3.08967e+06	2.04141e+06	538053	225126	5046271	2.82497e+06	5.66456e+06	4898275	2.65528e+06	2250214
AT1G54870.2	3.38476e+07	35514224	51491766	3.11893e+07			4.80852e+07	4.38349e+07	5.56433e+07	3.77898e+07	23706172	32062060	32432692	21829442	19305686	21813880	17648114	30947254	49526459	43703217	25915946	11441749	4.80403e+07	2.99195e+07	47763040	4.19646e+07		61320744	6.85189e+07	8.65713e+07	24327938	8561688	13151482		4177324	4180166	945835				8.33922e+06	4.67547e+06	8789961	3.21048e+06	14696540	10564873	4.54345e+07	3.59961e+07
AT1G55020.1	1.4022e+08	6.8853e+07	1.03113e+08	7.43183e+07	1.31528e+08	1.38258e+08	1.78945e+08	1.63459e+08	1.91121e+08	1.83818e+08	1.70326e+08	2.28087e+08	9.74323e+07	88629243	8.02586e+07	6.83424e+07	1.12025e+08	8.50948e+07	2.20337e+08	2.03086e+08	2.63095e+08	2.60304e+08	2.94644e+08	2.01091e+08	8.39781e+07	1.0398e+08	1.08198e+08	8.72637e+07	1.75841e+08	9.68157e+07	2.64306e+08	2.25469e+08	2.83677e+08	2.83406e+08	2.65148e+08	2.32027e+08	1.51071e+08	1.35585e+08	1.25023e+08	1.09576e+08	9.71366e+07	7.74094e+07	2.87218e+08	2.31752e+08	2.19823e+08	2.05578e+08	3.98833e+08	1.9723e+08
AT1G55090.1	4.33703e+07	1.91508e+07	1.82789e+07	1.46157e+07	6.93882e+07	6.41895e+07	3.19929e+07	5.79094e+07	4.17975e+07	3.31582e+07	3.15895e+07	4.12411e+07	5.82026e+07	5.28517e+07	3.52865e+07	3.2028e+07	2.96115e+07	2.91569e+07	4.64009e+07	4.13501e+07	6.33023e+07	7.74435e+07	4.61033e+07	5.64887e+07	2.54559e+07	2.20008e+07	5.56653e+07	3.77299e+07	5.87466e+07	4.00732e+07	4.64655e+07	6.33518e+07	7.78703e+07	6.50351e+07	6.50379e+07	5.40896e+07	5.59041e+07	5.66108e+07	5.27058e+07	5.67592e+07	3.61325e+07	2.5208e+07	7.79586e+07	5.96697e+07	7.63077e+07	6.95113e+07	1.01468e+08	3.95149e+07
AT1G55150.2	353694	525137	6.30346e+06	3.04335e+06	916215	1.04632e+06	3.97461e+06			3.66567e+06			1.20056e+06	5.09841e+06	4.60607e+06	3110075	5336843	490836	247970	4.39129e+06		661772			3.6849e+06	3.48404e+06	4.66922e+06	3.72901e+06	6.58492e+06	1.21022e+06	3.73986e+06	3.00722e+06	728161	571718	802966	958673	6.70189e+06	470837	4336461	4.25979e+06	3.80904e+06	3.51291e+06	1.46733e+06	5.0308e+06	5.2889e+06		6.37649e+06	3.81805e+06
AT1G55160.3	5.63147e+07	2.3991e+07	2.57105e+07	8.5775e+06	4.87154e+06	4.36315e+06	2.0737e+07	1.96496e+07	2.14065e+07	1.33162e+07	1.27627e+07	15665482	1.92066e+07	2.40493e+07	1.08227e+07	1.71027e+07	1.63119e+07	1.23604e+07	2.04071e+07	2.07152e+07	6.44453e+06	825456	1.61437e+07	17118362	2.65057e+07	1.67015e+07	4.05319e+06	1.62039e+07	4.17932e+07	1.85583e+07	2.48758e+07	1.89336e+06	1.13739e+06	2.86933e+06	2.44966e+06	1.95024e+06	5.51483e+06	4.33997e+06	2.24239e+06	830796	2.59816e+06	1.89205e+06	2.84759e+06	961453	1.64597e+06	916223	2.1975e+07	1.73427e+07
AT1G55260.1	9.97374e+06	5673265	3.41153e+06	3.8072e+06	7.5738e+06	1.28855e+07	4.25858e+06	7.79136e+06	4505695	7.78464e+06	4.02033e+06	3943919	7945413	6.7954e+06	5356845	7.86753e+06	8.11642e+06	7.09252e+06	9.81046e+06	8.6825e+06	4988047	4.79999e+06	6106312	4.63411e+06	8.20248e+06	7.15811e+06	6.86254e+06	1.08311e+07	1.31577e+07	6055955	4.79343e+06	4.22434e+06	6441610	5.5843e+06	7.94132e+06	3.76047e+06	8968142	6026267	11412292	1.05521e+07	1.01256e+07	6576859	4.62509e+06	9.59031e+06	1.17734e+07	5130683	6.87851e+06	3.2546e+06
AT1G55450.2	2.07945e+07	1.44423e+07	17231345	1.31262e+07	14401721	2.57947e+07	2.6433e+07	27441646	26917037	2.14981e+07	2.77782e+07	3.24972e+07	31275933	3.09906e+07	18192887	2.19338e+07	1.76103e+07	2.0127e+07	26460451	23345647	1.2924e+07	32026259	2.87469e+07	2.3025e+07	1.95295e+07	1.8651e+07	21896109	2.30932e+07	2.82333e+07	24449114	2.28362e+07	2.1326e+07	3.38137e+07	3.628e+07	3.62791e+07	36879434	3.95602e+07	3.28881e+07	2.64282e+07	2.55434e+07	2.19952e+07	1.17554e+07	5.83146e+07	4.36684e+07	3.81179e+07	32137974	4.30671e+07	3.42904e+07
AT1G55480.1	1.63801e+08	8.27229e+07	1.34711e+08	6.34585e+07	1.10222e+08	1.05049e+08	6.85571e+07	9.28167e+07	6.88731e+07	6.6871e+07	4.74576e+07	5.60185e+07	1.54816e+08	1.43777e+08	8.4647e+07	8.54018e+07	5.55063e+07	4.29022e+07	6.2968e+07	7.18273e+07	7.43421e+07	6.29049e+07	8.10078e+07	6.98633e+07	1.4778e+08	1.15884e+08	7.77447e+07	1.13633e+08	2.16333e+08	1.64285e+08	1.21606e+08	7.06143e+07	9.4176e+07	7.36638e+07	6.64113e+07	6.51322e+07	1.15057e+08	1.11284e+08	7.60665e+07	6.76489e+07	1.06406e+08	8.09218e+07	9.39753e+07	7.96219e+07	6.18382e+07	6.33469e+07	1.08792e+08	8.17953e+07
AT1G55490.5	9.74531e+09	4.4381e+09	7.32364e+09	4.35931e+09	3.14255e+09	2.87887e+09	3.92142e+09	3.48634e+09	3.99782e+09	2.52939e+09	2.67309e+09	2.71517e+09	4.59014e+09	3.45044e+09	3.24591e+09	3.17767e+09	2.51762e+09	2.67728e+09	3.5375e+09	2.57988e+09	2.92771e+09	2.80748e+09	3.56951e+09	2.71543e+09	8.91851e+09	7.22202e+09	3.06045e+09	4.57461e+09	8.97785e+09	7.34502e+09	3.09102e+09	2.47441e+09	3.09809e+09	2.94343e+09	3.12093e+09	2.68679e+09	4.21762e+09	3.47473e+09	3.18052e+09	2.97408e+09	2.75774e+09	2.07046e+09	3.70667e+09	2.81462e+09	3.12464e+09	2.76915e+09	7.43949e+09	4.78623e+09
AT1G55500.5	8349691	2.32036e+06	4903351	732585	9369137	7730735	3.08994e+06	2.49552e+06	3.23936e+06	2.75339e+06	3.03984e+06	3.02595e+06	2866171	3.36361e+06	2.94586e+06	2.79802e+06	2.39193e+06	2641641	2.21568e+06	1.78026e+06	3088716	3.35691e+06	5.15543e+06	2291684	1.86549e+06	1.07032e+06	3.72015e+06	1.60345e+06	11097786	3.70524e+06	3.62654e+06	3.5247e+06	5349443	6779518	7803952	4.29025e+06		3.37188e+06	4.67553e+06	3.04818e+06	4486672	1.87632e+06	5484605	3.47741e+06	3.07776e+06	2.17976e+06	11835684	2.05276e+06
AT1G55670.1	8.18237e+08	4.79898e+08	4.91699e+08	3.76494e+08	9.26602e+08	9.44169e+08	4.65909e+08	4.67711e+08	5.42192e+08	5.25777e+08	3.4685e+08	4.50984e+08	9.64022e+08	8.85683e+08	4.81794e+08	4.66797e+08	3.81815e+08	4.12078e+08	5.31011e+08	6.03355e+08	7.36359e+08	727546197	6.37874e+08	5.4288e+08	5.25721e+08	4.88784e+08	4.34087e+08	4.65837e+08	7.21288e+08	5.83829e+08	5.03647e+08	4.43995e+08	6.18419e+08	5.93035e+08	512626976	4.75981e+08	7.11507e+08	6.20036e+08	4.21176e+08	4.03047e+08	4.97834e+08	3.75862e+08	7.81949e+08	612882448	3.67137e+08	3.16774e+08	4.70259e+08	4.02558e+08
AT1G55850.1	80586.1	45211.1	45121	21348.6	418163		1.83579e+06	2.41539e+06	1.35012e+06	106884	3.21012e+06	1.85254e+06							194854	145204	298496		200026	3.77523e+06	163026	118027	1.05608e+06		2.35332e+06	1.22575e+06	1.62235e+06	301338	1.48118e+06	1.42739e+06	3.17471e+06	2.25867e+06				192559	1.11323e+06	39280.3	2.49358e+06	2.0938e+06	1.2678e+06	1.00064e+06	4.56657e+06	1.34917e+06
AT1G55860.1	8718571	6.07232e+06	9445111	4.14595e+06			4.03012e+06	4.44744e+06	4.5057e+06	3.40456e+06	3.97012e+06	3.09047e+06	6128586	4.47051e+06	2.93998e+06	4.63698e+06	3.1236e+06	3.40846e+06	4.35212e+06	4397400	842031		5.06689e+06	4330923	7.57326e+06	4885158		4953981	13075148	6.3648e+06	5.1832e+06						539012										4931279	3.86e+06
AT1G55890.1	3.67804e+06	2.48226e+06	522774	959726	5332567	3.1681e+06	3.26607e+06	3226018	3.57582e+06	2.564e+06	1.28268e+06	3162589	4351864	3127176	2.64932e+06	1.79448e+06	1.50644e+06	1.2053e+06	4.56568e+06	2947694	5.26037e+06	5.80713e+06	4.40149e+06	2.85238e+06	2.22937e+06	1.09917e+06	2.91039e+06	1.89252e+06	8.09944e+06	2.9898e+06	2.41455e+06	2.13999e+06	3.52284e+06	3003849	3.3895e+06	3066932	4608542	4.68581e+06	4.0701e+06	3.14288e+06	2.06531e+06	1.105e+06	4.21475e+06	3.96327e+06	2.81341e+06	1.32081e+06	4.94867e+06	4.252e+06
AT1G55900.1	54833136	30012000	51316800	21923584			14272354	13726756	22308026	15913168	13731608	11427683	21368784	18630766	13988764	17274876	11893654	16397413	17146810	17748734			21037528	16262027	43282392	31129360		37428636	64126396	39604620	24785188										7.62565e+06						47082452	29557664
AT1G56050.1	2.76076e+08	7.90674e+07	1.27282e+08	71871350	1.59645e+08	2.00967e+08	1.00283e+08	1.07269e+08	1.22505e+08	1.09486e+08	1.24969e+08	1.28878e+08	1.95363e+08	1.77882e+08	161880257	1.31065e+08	1.41746e+08	1.23045e+08	1.20987e+08	8.75051e+07	1.17619e+08	1.32011e+08	1.26667e+08	1.13791e+08	9.74409e+07	8.44279e+07	157810151	1.26392e+08	1.45394e+08	8.62711e+07	1.46176e+08	1.41671e+08	1.66142e+08	1.58005e+08	1.75478e+08	1.68172e+08	7.32717e+07	1.43878e+08	1.77155e+08	1.41943e+08	1.97689e+08	1.34641e+08	1.98081e+08	1.54783e+08	1.34762e+08	1.04946e+08	1.60993e+08	1.09636e+08
AT1G56070.2	1.65577e+10	6.5632e+09	1.15221e+10	6.42885e+09	8.66138e+09	7.77812e+09	7.99337e+09	8.39554e+09	9.87916e+09	9.03631e+09	7.97984e+09	9.85532e+09	1.22175e+10	1.15556e+10	8.95329e+09	8.71831e+09	7.53296e+09	8.13678e+09	1.01346e+10	9.70078e+09	9.03271e+09	8.7685e+09	1.07923e+10	8.95927e+09	8.60813e+09	7.39284e+09	7.52709e+09	8.41119e+09	1.26644e+10	8.26008e+09	1.05088e+10	8.73919e+09	1.08442e+10	8.51409e+09	1.06757e+10	7.95614e+09	4.92142e+09	5.80968e+09	8.82487e+09	8.13066e+09	8.11144e+09	7.15384e+09	1.04491e+10	8.40445e+09	9.71105e+09	8.06985e+09	1.34373e+10	8.73457e+09
AT1G56110.1	9.54615e+08	4.36585e+08	7.1466e+08	5.2256e+08	4.75657e+08	4.74171e+08	4.40068e+08	4.14367e+08	5.26787e+08	3.468e+08	3.11669e+08	3.37172e+08	6.07717e+08	4.45641e+08	4.33579e+08	4.43785e+08	3.27642e+08	3.08917e+08	5.1506e+08	3.99145e+08	4.0099e+08	4.21233e+08	3.83659e+08	2.71787e+08	8.6917e+08	5.7014e+08	3.68227e+08	3.50014e+08	1.12104e+09	5.94259e+08	3.39133e+08	2.87467e+08	4.11475e+08	4.09136e+08	3.41749e+08	3.44905e+08	6.37012e+08	5.44192e+08	3.72911e+08	3.42422e+08	3.28548e+08	2.38342e+08	5.9714e+08	4.58891e+08	3.53644e+08	3.22502e+08	6.51491e+08	3.7266e+08
AT1G56190.1	7.09046e+08	3.28094e+08	6.96088e+08	3.59234e+08	3.12052e+08	3.49687e+08	2.56e+08	2.40625e+08	3.05568e+08	2.47295e+08	2.25256e+08	2.17832e+08	3.89376e+08	3.13157e+08	3.09604e+08	3.16083e+08	2.51597e+08	2.57111e+08	2.93872e+08	2.18804e+08	2.03869e+08	2.20767e+08	2.68794e+08	2.16416e+08	5.71105e+08	5.23004e+08	3.95767e+08	3.52621e+08	6.24774e+08	5.00532e+08	3.64188e+08	3.17426e+08	3.27332e+08	2.73364e+08	2.56022e+08	2.31612e+08	6.69325e+08	4.81219e+08	3.19352e+08	2.94523e+08	3.78781e+08	2.3275e+08	2.71134e+08	2.8996e+08	2.69362e+08	2.1178e+08	4.33592e+08	2.98637e+08
AT1G56340.1	3.89905e+08	1.80001e+08	2.87837e+08	1.23394e+08	2.35918e+08	2.08628e+08	1.95893e+08	1.97494e+08	2.23591e+08	1.84266e+08	2.22648e+08	2.31387e+08	2.53893e+08	2.41008e+08	1.76594e+08	1.85837e+08	1.8829e+08	2.01257e+08	3.08666e+08	2.54768e+08	3.60004e+08	2.86017e+08	2.73953e+08	2.60356e+08	1.58997e+08	1.30514e+08	2.21263e+08	1.96219e+08	3.68318e+08	2.34064e+08	2.99098e+08	2.89832e+08	454780102	4.37285e+08	2.62674e+08	2.55817e+08	2.80475e+08	3.46177e+08	2.13751e+08	2.2815e+08	1.68951e+08	1.51829e+08	5.06621e+08	3.77982e+08	2.90871e+08	3.0173e+08	3.02306e+08	2.26853e+08
AT1G56410.1	3.20208e+06	848865					692684	1.02659e+06					894891		1149819		731549		591785					660106	3.98329e+06	3.23605e+06	2.14793e+06	1.40039e+06			2.94235e+06	3.28474e+06	1.85789e+06	1.5905e+06	2.98564e+06	3044085	3.51071e+06	2.6269e+06	2827037	1.4571e+06	5.00743e+06	3.48603e+06	3.20771e+06	2555184	1.41902e+06		6.55841e+06	2.04188e+06
AT1G56423.1				341883	7054.28	647547		4.90573e+06				7162		6497.47		643120		619198	1.1979e+06		588845	416633			11403004	8028.19	6609.27	379204			16722.5	1.52962e+06	1.05677e+06	1.34318e+06			718435	1.61512e+06			10975	5332.16	1.30545e+06	1.03059e+06	27548.3	401154		4.85316e+06
AT1G56430.1							1.24256e+06	570355	750832	1.24957e+06	544642						791943	422152	1.06968e+06	1.01968e+06		1.17932e+06	545487		1.47935e+06	1.32897e+06					1.61272e+06								1.72416e+06							1.83652e+06		1.71223e+06
AT1G56450.1	7.41133e+07	3.92495e+07	1.61266e+07	1.15397e+07	8.47377e+07	9.25144e+07	55364235	5.99882e+07	5.19357e+07	50331901	4.91593e+07	5.72946e+07	1.03297e+08	9.27334e+07	4.09107e+07	4.47174e+07	63075826	6.29818e+07	8.413e+07	7.64665e+07	1.13206e+08	1.13667e+08	5.79928e+07	52211191	4.41595e+07	3.77165e+07	6.65764e+07	6.1207e+07	7.97269e+07	8.19372e+07	6.44126e+07	6.42331e+07	8.93661e+07	8.28042e+07	9.42069e+07	8.23217e+07	1.11188e+08	9.01908e+07	6.371e+07	5.47615e+07	5.78848e+07	3.11106e+07	1.08687e+08	6.7427e+07	6.62833e+07	4.38742e+07	6.97034e+07	6.0694e+07
AT1G56500.1	4.33379e+08	3.40291e+08	4.86471e+08	4.47242e+08	1.3417e+09	1279579069	5.16383e+08	5.75502e+08	7.25582e+08	6.88204e+08	5.31455e+08	7.38301e+08	1.1341e+09	1.10998e+09	8.3915e+08	7.01889e+08	5.18849e+08	5.16054e+08	7.6046e+08	716912247	1.04705e+09	1017681129	7.31906e+08	4.49877e+08	613692992	589051877	1018879264	965510776	8.68693e+08	7.84118e+08	9.87225e+08	7.81723e+08	1.02486e+09	9.78783e+08	6.66099e+08	6.41032e+08	1366635905	1.30282e+09	7.98297e+08	810859620	7.79984e+08	5.50284e+08	1.04228e+09	7.671e+08	7.32747e+08	6.67947e+08	1.06499e+09	6.05184e+08
AT1G56560.1	1.40068e+06	1.36208e+06	3494262	834958	6.55026e+06	3.30564e+06	468649	1.57859e+07	9.81088e+06	1.07268e+07	5.12101e+06	5.80613e+06	1.10086e+07	1.43391e+07	9.38059e+06	2.19585e+07	1.01131e+07	2.92265e+06	1.04759e+07	1.61392e+07	6.24324e+06	6.49458e+06	5.7796e+06	1.85641e+07	1.51164e+06	3.92759e+06	1.11325e+07	4.2492e+06	2.24367e+06		23000517	1.81984e+07	2.17685e+07	1.13977e+07	1.40842e+07	9.34688e+06	1.23761e+06	3.25948e+06	1.00926e+07	1.48872e+07	8.95884e+06	1.04393e+07	1.77871e+07	9.79112e+06	1.68912e+07	1.9091e+07	15293033	2528058
AT1G56580.1	1.315e+08	6.26726e+07	1.03527e+08	7.77977e+07	3.73823e+07	3.41705e+07	5.03428e+07	4.65391e+07	5.61187e+07	1.81133e+07	1.7342e+07	2.2375e+07	6.28041e+07	4.47613e+07	1.33262e+07	1.48102e+07	1.90188e+07	2.74848e+07	4.48403e+07	2.35665e+07	3.54737e+07	3.79915e+07	2.28592e+07	1.88188e+07	1.71214e+08	1.4923e+08	2.57603e+07	42842456	1.17864e+08	1.29482e+08	2.15285e+07	2.13524e+07	3.5596e+07	3.57979e+07	2.73551e+07	2.66435e+07	5.28347e+07	4.75791e+07	2.50494e+07	2.40246e+07	1.54121e+07	9.33113e+06	4.46332e+07	3.37864e+07	2.94604e+07	2.31244e+07	7.64209e+07	6.63868e+07
AT1G56700.1	2.36163e+07	5.55068e+06	6.64341e+06	3.5457e+06	8.71877e+06	1.09898e+07	1.06536e+07	1.11941e+07	1.04532e+07	8.35022e+06	9.17364e+06	8.5169e+06	1.23988e+07	1.07323e+07	7.71358e+06	5.93463e+06	9.21594e+06	8.85146e+06	1.1379e+07	6706246	1.24019e+07	1.26668e+07	7.90985e+06	8.18627e+06	5.87377e+06	3.88893e+06	8992698	5.53441e+06	1.67796e+07	1.07215e+07	5779987	5.2514e+06	9.413e+06	8.50188e+06	1.10574e+07	9.99141e+06	3.91864e+06	5.65187e+06	8.5549e+06	6.98566e+06	9.77418e+06	4.04597e+06	1.0924e+07	7.20023e+06	1.01379e+07	4.03911e+06	16399338	5.77158e+06
AT1G57720.1	4.28846e+09	1.5661e+09	2.96844e+09	1.73678e+09	2.46929e+09	2.40497e+09	2.05492e+09	2.14403e+09	2.5709e+09	2.19786e+09	2.35759e+09	2.69547e+09	2.91149e+09	2.75454e+09	2.39679e+09	2.07544e+09	1.96362e+09	1.95149e+09	2.81752e+09	2.31874e+09	2.7468e+09	2.83261e+09	2.9797e+09	2.26237e+09	2.16718e+09	1.79632e+09	2.04561e+09	2.14972e+09	3.22387e+09	2.02723e+09	2.80058e+09	2.57044e+09	2.98022e+09	2.46497e+09	2.53017e+09	2.13905e+09	2.38989e+09	2.31073e+09	2.36928e+09	2.11535e+09	2.37346e+09	2.07008e+09	3.01558e+09	2.35798e+09	2.89925e+09	2.27954e+09	3.94833e+09	2.11834e+09
AT1G57770.1	13571845	5.07708e+06	1.14644e+07	5.33101e+06	3.6362e+06	4.27866e+06	3781942	4.69767e+06	3538774	1.85006e+06	4.33372e+06	3.84754e+06	6.33907e+06	2.85769e+06	5461118	4973635	2.10087e+06	2.34396e+06	5.3041e+06	4.8826e+06	1.49544e+06	1.5978e+06	2663384	3.30045e+06	1.34508e+07	8.615e+06	4.30289e+06	4692204	2.85247e+07	7.78191e+06	4.20388e+06	3.81176e+06	4655574	4120774	3.37785e+06	3.59566e+06	7127194	3.89172e+06	4.94683e+06	3.99867e+06	6.21024e+06	3.38381e+06	3781579	3967926	4.47889e+06	4.64875e+06	9.65964e+06	4.41115e+06
AT1G58080.1	2.18783e+08	1.33924e+08	1.62784e+08	1.30134e+08	2.89706e+08	2.48177e+08	1.77927e+08	1.80111e+08	1.76296e+08	1.52927e+08	1.56934e+08	1.84161e+08	3.36491e+08	3.13874e+08	2.2259e+08	2.06336e+08	1.74109e+08	1.88576e+08	2.16026e+08	2.04275e+08	2.93274e+08	2.80691e+08	2.3265e+08	1.99145e+08	1.78851e+08	1.72501e+08	2.25276e+08	2.2445e+08	2.523e+08	2.11641e+08	2.06371e+08	1.74831e+08	2.7471e+08	2.39023e+08	1.93145e+08	1.71726e+08	1.63452e+08	1.44697e+08	2.00052e+08	2.15373e+08	2.23715e+08	1.5553e+08	3.42161e+08	2.33109e+08	2.22466e+08	1.9992e+08	3.04301e+08	1.95544e+08
AT1G58270.1	3.52009e+07	19271225	2.93064e+07	9.39239e+06	1.00648e+07	335999	1.45153e+06	2.30246e+06	2.38735e+06	3.11581e+06	2.03542e+06	3.38946e+06	1.7735e+07	2.58656e+07	1.39381e+07	1.64025e+07	7790554	13149279	3.40433e+06	4.31514e+06	2.27938e+06		6847115	11527380	1.97813e+07	1.09794e+07	621952	1.93552e+07	54034239	18842379	1.3217e+07	8709072	8449479	1.32139e+06	3.9598e+06	891249	1.64125e+06	1.68246e+06	5.03693e+06	12961565	1.04937e+07	1.90486e+07	1.5061e+06	811891	1.30228e+06	3.20549e+06	653070	2.59941e+06
AT1G58280.2	3.55682e+06	1.78048e+06	737511	552327	5.85656e+06	6.34191e+06	3053749	3725486	2.59467e+06	2.30354e+06	3.06432e+06	3691975	5.93772e+06	4.8504e+06	2.21197e+06	2.5821e+06	2.46304e+06	2.68629e+06	5446347	4.93664e+06	6.87338e+06	7615172	4.57081e+06	3.62012e+06	3.0378e+06	2.57462e+06	4.56608e+06	3889270	3.89465e+06	3.9205e+06	5.7564e+06	6.25877e+06	8.6722e+06	7.90177e+06	9.83278e+06	8.14975e+06	8.23682e+06	7.98667e+06	5.86039e+06	4.44911e+06	3.38908e+06	1.35708e+06	1.0521e+07	6988196	6.26791e+06	3.52921e+06	6.41008e+06	5.07434e+06
AT1G58290.1	50303486	1.7913e+07	32242048	2.04053e+07	4.73433e+07	2.80107e+07	2.56427e+07	2.76536e+07	34214468	3.3898e+07	28287712	34608879	4.56227e+07	4.30089e+07	33444996	3.27397e+07	30309244	2.54113e+07	3.44957e+07	3.24815e+07	4.0549e+07	36744253	41020329	3.32407e+07	28011771	2.71082e+07	4.39411e+07	4.16971e+07	33304446	1.98581e+07	50065658	32681826	3.88096e+07	1.49947e+07	2.35672e+07	17126385	1.43427e+07	2.70232e+07	3.16298e+07	3.78984e+07	3.71931e+07	3.16398e+07	41986846	3.7829e+07	4.02351e+07	36770336	43870695	32395885
AT1G58380.1	4.57612e+08	1.76274e+08	2.87424e+08	1.73701e+08	539623051	5.18848e+08	2.2712e+08	2.38014e+08	2.91355e+08	2.49504e+08	3.52405e+08	3.88361e+08	4.89176e+08	4.55783e+08	2.87279e+08	2.46229e+08	2.32843e+08	2.08987e+08	2.93044e+08	2.57451e+08	3.78116e+08	3.71835e+08	3.2759e+08	2.18746e+08	2.55068e+08	2.23044e+08	4.47466e+08	3.8366e+08	4.86898e+08	4.39238e+08	4.06192e+08	3.37433e+08	5.54604e+08	523421809	4.67334e+08	4.8103e+08	5.22412e+08	4.7404e+08	3.60599e+08	3.44881e+08	3.5981e+08	2.29829e+08	5.06668e+08	3.71999e+08	3.41632e+08	2.85866e+08	5.77936e+08	3.28591e+08
AT1G59610.1	3.88625e+08	1.71533e+08	2.37734e+08	1.12949e+08	3.47327e+08	3.9705e+08	1.49844e+08	1.76135e+08	7.58708e+07	2.1134e+08	3.1586e+08	2.18415e+08	2.48342e+08	3.0458e+08	2.32979e+08	1.30746e+08	1.87576e+08	1.30307e+08	2.63337e+08	1.99294e+08	3.63438e+08	3.62461e+08	2.4252e+08	1.81131e+08	1.37271e+08	2.18484e+08	1.98339e+08	2.79975e+08	2.3972e+08	2.29441e+08	1.2337e+08	2.58519e+08	3.16267e+08	2.96039e+08	2.64866e+08	3.23493e+08	2.4221e+08	3.66223e+08	2.66988e+08	2.64671e+08	3.07628e+08	2.34466e+08	3.13028e+08	3.04756e+08	2.35778e+08	2.95038e+08	2.07206e+08	2.54209e+08
AT1G59700.1	1.18089e+07	9.85759e+06	3.64457e+06	6.15852e+06	3.00626e+07	2.90927e+07	1.53806e+07	1.7505e+07	22039479	1.58555e+07	1.59166e+07	1.95754e+07	3.28033e+07	3.30185e+07	1.15381e+07	1.29327e+07	1.23733e+07	1.49109e+07	2.44452e+07	2.31905e+07	4.45249e+07	4.63063e+07	1.96784e+07	1.64262e+07	1.54355e+07	1.44884e+07	2.61992e+07	2.32754e+07	3.51304e+07	3.45934e+07	3.08292e+07	2.93397e+07	5.03955e+07	4.419e+07	4.36816e+07	4.03903e+07	4.67544e+07	4.3457e+07	2.58256e+07	2.57627e+07	1.7474e+07	8.95807e+06	52961656	3.72621e+07	3.69259e+07	2.78564e+07	4.10185e+07	3.19123e+07
AT1G59870.1	1.14646e+09	5.10899e+08	5.83428e+08	3.85975e+08	2.06304e+08	1.70144e+08	4.93042e+08	4.04454e+08	5.19401e+08	1.08563e+08	1.25131e+08	1.42918e+08	3.72044e+08	1.72502e+08	2.30184e+08	2.02854e+08	1.04941e+08	1.89804e+08	3.87666e+08	1.52536e+08	2.0076e+08	2.03129e+08	1.77449e+08	1.4326e+08	6.57905e+08	5.40517e+08	1.48722e+08	1.35942e+08	6.52402e+08	5.42522e+08	1.51302e+08	1.37227e+08	2.10668e+08	2.02363e+08	2.04454e+08	1.86339e+08	2.27554e+08	1.98654e+08	1.56494e+08	1.43547e+08	1.40442e+08	8.9147e+07	2.70563e+08	2.05246e+08	1.90984e+08	1.5156e+08	5.40965e+08	3.54316e+08
AT1G59900.1	3.79237e+08	1.497e+08	2.01666e+08	1.18896e+08	2.47077e+08	2.41012e+08	2.08042e+08	2.22685e+08	2.27509e+08	2.10449e+08	2.17355e+08	2.55427e+08	2.92761e+08	2.78225e+08	2.27602e+08	2.0603e+08	2.30522e+08	2.23093e+08	2.77062e+08	2.35815e+08	2.87861e+08	2.92563e+08	2.94326e+08	2.48256e+08	1.89457e+08	1.71194e+08	2.40764e+08	2.16245e+08	2.80135e+08	2.22731e+08	2.42189e+08	2.2869e+08	3.05412e+08	2.78255e+08	288714521	2.70437e+08	1.15449e+08	2.17635e+08	2.55121e+08	2.18475e+08	2.12122e+08	1.87424e+08	3.4454e+08	2.75647e+08	3.21631e+08	2.77237e+08	3.22556e+08	2.35957e+08
AT1G60000.1	19034353	5.21719e+06	1.32162e+07	5.57978e+06	1.35129e+07	10231080	8.03899e+06	6754515	1.09963e+07	9.12802e+06	10175202	9.5626e+06	9.8761e+06	1.36113e+07	6.06355e+06	5.88496e+06	1.51957e+07	8.96783e+06	1.13437e+07	5507194	9.08204e+06	7.23778e+06	7.21427e+06	5.25841e+06	1.13866e+07	6016043	18230463	1.72474e+07	2.52103e+06	2258869	13950944	10844128	2.15097e+07	1.80463e+07	4.32396e+06	4.49147e+06	2.17271e+07	17416320	19883689	1.62952e+07	9.70294e+06	5.85866e+06	9510124	6.10451e+06	8507349	8.24296e+06	16883932	8.25623e+06
AT1G60070.2	6.4246e+07	1.14613e+08	3.35426e+07	9.34065e+07	31707519	75745523	2.39375e+07	1.31162e+08	1.41702e+08	8.74005e+07	2.69453e+07	110462892	1.2917e+08	1.42077e+08	2.96124e+07	3.3556e+07	2.45525e+07	3.38522e+07	3.46391e+07	1.39636e+08	72946378	2.96918e+07	4.22395e+07	3.51528e+07	2.23061e+07	2.04779e+07	37115753	3.2874e+07	1.11129e+08	1.27531e+08	2.1855e+08	2.09454e+08	4.5022e+07	122220972	2.24552e+08	1.68954e+08	107201604	9.31771e+07	3.81216e+07	2.18483e+08	23875384	3.04056e+07	1.8049e+08	1.57645e+08	1.77655e+08	9.26562e+07	4.36844e+07	1.66525e+08
AT1G60140.6		555609	1.60897e+06		1.63889e+06	1.67398e+06	1.65704e+06		1.5794e+06		2741708	2.39761e+06		1.14856e+06	2.04493e+06	1.73245e+06	1.69152e+06	2.1737e+06	1.47035e+06	1.38529e+06	2114811	1.97613e+06	2.29041e+06	1.92554e+06			1.93239e+06	1267543			1.66944e+06	1.13848e+06	1.18697e+06	1.37984e+06	2418418	3576508		1083179	854226	947222	1.75608e+06	604349	3.18414e+06	2463847		1.90726e+06	2.18249e+06
AT1G60170.1	11940144	5.96553e+06	6.33237e+06	2.57315e+06	1.09116e+07	9321075	3.62267e+06		5.22114e+06		4.82356e+06	5905027	6573418	10844404	8772238	6956673	6873779	6.00728e+06	2.92888e+06	3.3715e+06	5484020	5748082		6071612	7.45903e+06	5.46147e+06	8967413	7787177	9.0945e+06	4.59328e+06	11473685	10804666		10825892			9688387	11625443	12655845	9120004	1.10167e+07	8810851	18914234	4838281		4.12405e+06	9941214	5077724
AT1G60200.1	2.37641e+06	159886	1.19932e+06	499582	4071.2	4175.26	223437	56521	259971	17141.7	6621.09	12496.9					8682.77	8538.17	113958						799052	719953	8465.71		3512949	954518						5750.76		41121.2	104220				16568.5	22266.1				116630
AT1G60420.1	8.91871e+07	2.77202e+07	5.95047e+07	2.50883e+07	6.41608e+07	5.83636e+07	4.20439e+07	4.94339e+07	5.55696e+07	4.0051e+07	4.37266e+07	5.68615e+07	6.59735e+07	62150913	5.20805e+07	3.95727e+07	4.73892e+07	3.41935e+07	5.62997e+07	5.31061e+07	6.93366e+07	66009787	5.54106e+07	4.06658e+07	4.21408e+07	3.94552e+07	6.0852e+07	5.26016e+07	6.2809e+07	5.47352e+07	5.71793e+07	6.19835e+07	7.0322e+07	6.99418e+07	6.10052e+07	5.71138e+07	7.63807e+07	6.94927e+07	56280745	4.75397e+07	4.08906e+07	3.44675e+07	8.49053e+07	6.28957e+07	7.28594e+07	6.21774e+07	9.70938e+07	5.00721e+07
AT1G60550.1	1.78619e+07	4.86883e+06	1.78173e+06	2.21295e+06	1.37297e+07	1.23832e+07	7.27301e+06	7.32968e+06	9.56188e+06	5.83939e+06	7098473	9.65052e+06	1.50946e+07	1.1901e+07	9.9649e+06	10114239	7.26448e+06	6873436	1.1805e+07	1.02391e+07	1.39226e+07	1.92981e+07	9.6812e+06	1.69554e+07	8.49314e+06	6.03566e+06	9.79711e+06	9.56814e+06	9.0955e+06	9.03087e+06	1.41791e+07	1.3345e+07	1.98262e+07	1.56716e+07	1.71568e+07	1.44545e+07	2.0518e+07	1.88863e+07	8.74867e+06	1.0362e+07	1.17172e+07	6.17705e+06	2.09673e+07	1.62413e+07	1.49044e+07	1.35476e+07	2.75599e+07	1.45324e+07
AT1G60680.1	54460761	2.5249e+07	3.75791e+07	1.94492e+07	4.18713e+06	4.55403e+06	37441715	39622351	42613377	3.60185e+07	2.81906e+07	28901816	28251649	26532562	2.1162e+07	2.35344e+07	1.95358e+07	2.26664e+07	4.39015e+07	3.88113e+07	25057807	1.14399e+07	47146556	40118357	31833950	23084946	7.30821e+06	34085088	5.3868e+07	30950399	40765643	1.01557e+07	1.54771e+07	6377949	9357696	1.12376e+07	7.85082e+06	6251091	6204348	6.10662e+06	1.04554e+07	5.61882e+06	14138138	1.37349e+07	1.51737e+07	13377119	4.91275e+07	40928678
AT1G60710.1	4.34987e+08	1.55853e+08	2.5855e+08	1.36708e+08	3.12626e+08	2.94315e+08	2.31558e+08	2.28252e+08	2.59726e+08	2.28553e+08	2.71656e+08	2.71163e+08	2.96474e+08	2.56871e+08	2.38267e+08	1.90177e+08	1.83142e+08	1.87182e+08	2.83024e+08	2.49801e+08	3.36019e+08	3.02811e+08	3.17725e+08	2.55928e+08	2.0914e+08	1.71134e+08	2.17854e+08	1.90119e+08	2.97971e+08	2.01985e+08	2.96543e+08	2.33536e+08	324954536	2.6808e+08	3.35516e+08	3.03609e+08	4.03085e+08	2.78047e+08	2.43584e+08	1.98874e+08	2.46786e+08	1.75646e+08	3.39094e+08	2.67287e+08	2.88901e+08	2.30213e+08	4.18408e+08	2.33659e+08
AT1G60730.1	6656502	3.67071e+06	8608915	2.75089e+06			3.85542e+06	3.40215e+06	5.58639e+06	4.78572e+06	3967368	4938579	5617112	6.74616e+06	3610797	4.56211e+06	1593905	2.32805e+06	5655075	5369533	4589762		7.35563e+06	7.99028e+06	10701685	9184401		5727466	12965572	7215910	15434432	2.95886e+06									3652363	3.07031e+06			2.57883e+06	3.09371e+06	10282005	8.16944e+06
AT1G60740.1	2640232	1.18713e+06	527804	486883	4.30705e+06	4556640	2.07181e+06	2.58272e+06	2.63151e+06	2.62626e+06	3.2852e+06	4207957	4.10457e+06	3134903	1.54229e+06	1.95752e+06	1.99428e+06	2.06848e+06	3.60094e+06	5.59015e+06	7.09076e+06	8186134	4.58736e+06	4157374	2.49029e+06	2140973	4.44011e+06	3.54555e+06	4554097	3.27219e+06	8295248	7427862	13145524	10954044	1.16484e+07	11047115	10570408	8934628	4.99217e+06	3797414	2834831	1.23262e+06	15394797	9152253	11939143	6879673	6.7929e+06	6482519
AT1G60750.1	3.64588e+06	2943555	1.18121e+06	1.0837e+06	5.53357e+06	6.2216e+06	6370409	6.71992e+06	7270975	7.17746e+06	6.31528e+06	7.49435e+06	9547410	8.21655e+06	3.52603e+06	3.0359e+06	9536888	10051705	9926823	8.30385e+06	11865154	10559735	8817576	7480384	7.72123e+06	7.39194e+06	5.17222e+06	3860281	14767089	12072721	3.60501e+06	3.52365e+06	6.15213e+06	4.81354e+06	4238079	3.73005e+06	10275034	9061512	3.85154e+06	2.97226e+06	2.29662e+06	1.48357e+06	10824572	7270936	4.41613e+06	4268953	6.24364e+06	3.35131e+06
AT1G60770.1		903002	8.79888e+06	3.05795e+06	8.95228e+06	6.75256e+06	3.54045e+06	3.62119e+06	5.57045e+06	4160817	6218956	6.5304e+06	7.57551e+06	4549278	4.81229e+06	5.35264e+06	2140684	2.3112e+06	8.05895e+06	4.67167e+06	6.56909e+06	5.73261e+06	7.22848e+06	1316267	3.44964e+06	1.14892e+06	4.0522e+06	3.12235e+06	4.99685e+06	3392289	4739671	2.35211e+06	5.51715e+06	4.92891e+06	3.60416e+06	3.85503e+06	6.89627e+06	5.27409e+06	1.12557e+06	5.16356e+06	946765	863422	5.93935e+06	4.40525e+06	1.16352e+06	640062	9628418	4753524
AT1G60780.1	1.21424e+07	1.30706e+07	1.48583e+07	1.58303e+07	4.49647e+07	5.40112e+07	2.95671e+07	3.57319e+07	4.07775e+07	2.99261e+07	2.44393e+07	4.96297e+07	4.43628e+07	4.32945e+07	3.01852e+07	36724218	1.97679e+07	30220229	3.35899e+07	3.90341e+07	5.16343e+07	4.38328e+07	3.30741e+07	3.31609e+07	27419454	26022606	40333532	3.86127e+07	3.36552e+07	3.01099e+07	4.27052e+07	3.43779e+07	46460188	49589424	3.30469e+07	33386724	5.36866e+07	5.48666e+07	3.23654e+07	3.54374e+07	2.65451e+07	1.99727e+07	6.19901e+07	5.0457e+07	1.34831e+06	4.06186e+07	4.36537e+07	2.8311e+07
AT1G60810.2	2.19501e+07	1.06898e+07	1.49377e+07	8.95372e+06	2.32705e+07	1.86557e+07	136709	1.87688e+07	2.05295e+07	1.81336e+07	1.74343e+07	2.34579e+07	2.60704e+07	357701	1.79934e+07	1.65084e+07	226357	1.68901e+07	2.50493e+07	2.20996e+07	2.57101e+07	2.80107e+07	2.4688e+07	1.87846e+07	1.38928e+07	1.24669e+07	1.58101e+07	1.61644e+07	1.84055e+07	1.18677e+07	1.81058e+07	1.53034e+07	1.7113e+07	1.79196e+07	1.57814e+07	317199	2.23032e+07	1.98362e+07	295695	1.50597e+07	1.62503e+07	1.2532e+07	2.05335e+07	290667	17662305	1.76e+07	2.75704e+07	1.66652e+07
AT1G60940.2	3.2359e+07	1.98965e+07	1.66738e+07	1.05682e+07	3.8023e+07	3.62002e+07	3.12316e+07	3.33869e+07	3.29306e+07	2.81416e+07	1.63677e+07	2.32683e+07	5.41587e+07	4.99383e+07	1.71442e+07	1.34877e+07	3.88415e+07	2.37885e+07	3.3986e+07	4.59023e+07	3.6425e+07	3.38171e+07	2.0764e+07	1.67137e+07	3.83056e+07	3.08673e+07	4.37028e+07	4.23222e+07	5.38649e+07	4.31167e+07	4.65855e+07	4.04745e+07	4.86662e+07	4.34765e+07	4.13666e+07	3.86716e+07	4.77056e+07	4.2421e+07	3.77751e+07	3.96118e+07	36686959	2.67839e+07	5.9175e+07	4.58739e+07	5.04433e+07	4.34065e+07	6.68287e+07	5.89822e+07
AT1G60990.3	1.95501e+07	1.06561e+07	7.01187e+06	8.50191e+06	5.38363e+07	5.59266e+07	1.17536e+07	1.42265e+07	1.514e+07	1.48374e+07	1.83087e+07	1.99316e+07	4.51348e+07	3.75781e+07	1.51481e+07	1.22137e+07	1.73015e+07	1.80501e+07	2.22402e+07	2.14897e+07	4.12549e+07	4.56836e+07	1.99224e+07	1.75442e+07	2.11976e+07	1.97981e+07	4.48921e+07	3.56781e+07	2.52792e+07	2.20456e+07	50587584	4.50022e+07	69457944	5.70464e+07	4.6055e+07	40352495	94945264	7.63313e+07	4.46582e+07	3.59058e+07	2.80949e+07	1.37915e+07	6.47892e+07	3.76054e+07	4.05136e+07	2.49484e+07	33602095	2.84372e+07
AT1G61150.11	748899	489269		894428	1.22635e+06	1.62263e+06	4.00915e+06	962874	1.66687e+06	1.10586e+06	3.95546e+06	1.43989e+06	3.11764e+06	1.65037e+06		5.11007e+06	716009	7.22704e+06	1.62176e+06		1.25293e+06	1.60969e+06	1634375	1.52071e+06	1.35448e+06	642991	2.43843e+06	867871	1.22482e+06	1213747		722187	692095	8.90695e+06	1.03474e+07	1.0353e+07	1.29377e+07	505612	1.52477e+06	1.34363e+06	2.80056e+06	859364		901898	1.25572e+06	957872	1.17416e+07	1.17512e+06
AT1G61520.1	4.27462e+08	3.05557e+08	2.71129e+08	2.49098e+08	9.63395e+08	9.80418e+08	3.57831e+08	4.0413e+08	4.57248e+08	4.14305e+08	3.68755e+08	4.19968e+08	8.229e+08	7.72742e+08	4.22184e+08	3.66464e+08	3.90392e+08	3.92408e+08	4.96142e+08	4.8086e+08	7.02099e+08	6.82655e+08	5.46566e+08	4.67301e+08	3.69267e+08	3.33499e+08	4.55128e+08	3.99705e+08	5.67288e+08	5.41535e+08	4.74484e+08	4.25017e+08	6.71889e+08	6.40169e+08	4.36997e+08	4.3928e+08	7.43216e+08	6.77998e+08	4.23858e+08	3.90832e+08	475906990	3.08109e+08	7.85293e+08	5.64795e+08	3.67942e+08	2.97337e+08	4.96881e+08	2.94944e+08
AT1G61570.1	3.13388e+08	7.00309e+06	4.15781e+08	5.68144e+07	1.45872e+08	1.16397e+08	5.39343e+07	4.60469e+07	6.46292e+07	5.14912e+07	7.09232e+07	6.71015e+07	1.10136e+08	7.99541e+07	7.98482e+07	4.76278e+07	9.13721e+07	6.85993e+07	8.83644e+07	5.37112e+07	1.04954e+08	7.46985e+07	8.95966e+07	7.68407e+07	5.02695e+07	3.9434e+07	1.425e+07	5.43057e+07	1.92753e+08	6.02578e+07	9.44866e+07	1.00181e+08	1.42593e+08	8.51114e+07	1.08657e+08	8.44675e+07	2.87594e+08	1.66789e+08	1.45135e+08	1.048e+08	1.50687e+08	7.27637e+07	1.36311e+08	7.71862e+07	7.77461e+07	5.48589e+07	2.20821e+08	4.58869e+07
AT1G61580.1	7.97252e+07	3.87278e+07	5.51069e+07	4.21427e+07	5.51418e+07	5.55236e+07	3.52727e+07	3.28287e+07	5.2648e+07	3.57861e+07	3.04693e+07	4.23684e+07	6.29582e+07	4.92918e+07	4.02106e+07	3.95808e+07	3.19363e+07	3.48821e+07	5.14084e+07	4.5993e+07	6.12345e+07	5.332e+07	4.34939e+07	2.90754e+07	6.81733e+07	6.54457e+07	4.13488e+07	3.92091e+07	9.55592e+07	8.152e+07	33554295	3.54508e+07	4.70877e+07	4.24285e+07	3.04249e+07	3.07384e+07	5.22393e+07	5.27484e+07	3.74824e+07	3.05438e+07	3.63325e+07	2.44146e+07	5.72902e+07	4.73598e+07	3.4968e+07	2.7726e+07	6.24985e+07	4.74491e+07
AT1G61730.1		23605.6			64813.5	89596.7			41946.3							20904.7				36122.6	54818.2	61101.2		35152.8		927896			56748.2		137254			143890					127308	94168.7		46576.5	215733			103682	40161.6
AT1G61770.1	6.98045e+06	3.96129e+06	1826160	2.28747e+06	10223021	9564057	5.00725e+06	6.12202e+06	8054658	5870193	6.58271e+06	8298498	13530417	12003951	5265542	5.44996e+06	9113122	9465693	8732640	7895933	11259003	10108044	8944030	7619720	4073402	3.78021e+06	6.90501e+06	6221842	11754681	11325655	4392121	3.96039e+06	5688490	5239255	5898880	4864431	6.47052e+06	6.38464e+06	5.05481e+06	5352735	4489338	3.03088e+06	6.56697e+06	4832322	5425325	4.50388e+06	6.33008e+06	3.78794e+06
AT1G61790.1	2.04131e+07	5.85102e+06	9.6381e+06	5.93796e+06	1.49417e+07	7.76855e+06	3.89849e+06	5.96804e+06	1.10275e+07	9.96584e+06	1.0962e+07	1.38272e+07	7.57176e+06	7.52182e+06	3.01858e+06	4986432	7.25826e+06	8.28751e+06	8.61867e+06	8.41934e+06	1.04643e+07	7.37992e+06	7.18984e+06	7.46337e+06	7.65081e+06	7.00689e+06	1.09505e+07	6.90082e+06	2.17689e+07	7.2937e+06	1.48055e+07	1.63991e+07	2.19075e+07	2.39996e+07	3.61208e+07	2.06233e+07	20518124	1.85771e+07	1.35624e+07	8.62582e+06	8.64897e+06	5.47465e+06	2.59083e+07	2.30877e+07	1.40177e+07	1.42443e+07	3.00439e+07	2.46696e+07
AT1G61870.1	7.82131e+06	4.15081e+06	3.08308e+06	2.73055e+06	1.61538e+07	1.64393e+07	3.387e+06	6.37765e+06	6.3862e+06	6.08339e+06	7.53868e+06	7.89983e+06	1.31208e+07	1.30362e+07	7469343	7.6972e+06	6.04924e+06	6159784	7.89951e+06	4.80051e+06	10890811	1.12444e+07	9.52918e+06	6.30504e+06	6.39056e+06	4.97588e+06	1.00061e+07	7503213	9.05315e+06	7.34764e+06	6.0814e+06	5857173	1.49339e+07	1.33707e+07	1.21206e+07	1.04195e+07	2.00796e+07	1.7667e+07	7.91593e+06	9.46284e+06	9.93564e+06	4.70979e+06	11259621	1.11626e+07	10963924	7.17519e+06	13628810	8.98414e+06
AT1G61900.1	5.11695e+07	1.0992e+07	25655065	7.35494e+06	32495280	1.97722e+07	1.30323e+07	1.65954e+07	1.5524e+07	2.08002e+07	2.03983e+07	1.97138e+07	2.7749e+07	2.44159e+07	26923846	1.82099e+07	2.48732e+07	2.45524e+07	1.92854e+07	15148211	2.5485e+07	2.46856e+07	2.26558e+07	1.94187e+07	1.44218e+07	9.39246e+06	2.64869e+07	16037442	37955301	2.07941e+07	2.09737e+07	1.68331e+07	2.44373e+07	19198254	26893532	1.71539e+07	26526709	24005275	2.22626e+07	15122064	1.41272e+07	1.37592e+07	17535627	13096099	1.64684e+07	11000221	26449588	1.0598e+07
AT1G62020.1	1.49718e+08	5.0873e+07	7.0609e+07	4.27735e+07	7.07986e+07	5.84661e+07	6.20258e+07	7.46056e+07	8.83592e+07	8.21902e+07	8.05061e+07	8.61069e+07	1.222e+08	1.02013e+08	7.85028e+07	8.28198e+07	7.15526e+07	6.9742e+07	7.99185e+07	8.70866e+07	8.21238e+07	7.70005e+07	1.28271e+08	1.06478e+08	5.15081e+07	4.11083e+07	6.59524e+07	6.60154e+07	1.13138e+08	82137181	1.03348e+08	7.1592e+07	1.01207e+08	7.65673e+07	1.07561e+08	6.92128e+07	9.58343e+07	8.13972e+07	6.17622e+07	6.94123e+07	5.17686e+07	4.32906e+07	1.09972e+08	8.00662e+07	9.70872e+07	8.11831e+07	1.1234e+08	8.11594e+07
AT1G62180.1	1.52653e+07	7.50805e+06	5.40706e+06	3.58451e+06	1.90822e+07	1.89199e+07	9.68529e+06	1.06953e+07	1.3259e+07	1.18254e+07	1.43472e+07	1.68587e+07	2.5234e+07	2.27358e+07	1.0189e+07	1.27132e+07	1.47452e+07	1.12645e+07	1.47813e+07	1.10223e+07	1.51694e+07	1.913e+07	1.19194e+07	1.42812e+07	9.45867e+06	9.27638e+06	1.37452e+07	1.17967e+07	1.9881e+07	1.63617e+07	1.71475e+07	1.548e+07	2.29862e+07	2.23386e+07	26905791	2.43101e+07	3.43917e+07	3.00126e+07	1.72625e+07	1.50598e+07	1.58922e+07	9.96345e+06	2.96316e+07	2.06668e+07	1.52313e+07	1.04246e+07	2.47196e+07	1.91349e+07
AT1G62380.1	3.49047e+08	1.72449e+08	2.42864e+08	1.58752e+08	5.13554e+08	4.95005e+08	4.63095e+08	4.93261e+08	4.91902e+08	4.78185e+08	5.88253e+08	7.87601e+08	4.56005e+08	4.39895e+08	4.57295e+08	3.66122e+08	3.10089e+08	2.54951e+08	5.53811e+08	5.06565e+08	9.07159e+08	8.93034e+08	7.26326e+08	5.09511e+08	1.97992e+08	1.94795e+08	3.8741e+08	3.77568e+08	5.16495e+08	4.44014e+08	3.81821e+08	3.19311e+08	7.48461e+08	7.27195e+08	6.55699e+08	6.26784e+08	5.77336e+08	5.17247e+08	5.02469e+08	4.69773e+08	3.59608e+08	2.61732e+08	1.14982e+09	9.18021e+08	8.27309e+08	7.67068e+08	1.15267e+09	6.32529e+08
AT1G62390.1	1.26234e+08	6.10955e+07	8.35016e+07	4.5604e+07	5.00841e+07	5.88077e+07	4.67934e+07	4.89664e+07	4.96408e+07	4.4981e+07	4.47645e+07	4.20649e+07	8.61927e+07	7.43466e+07	4.11219e+07	4.95399e+07	3.72582e+07	4.47505e+07	4.53761e+07	5.03587e+07	4.91842e+07	4.05696e+07	5.84674e+07	4.71235e+07	7.42232e+07	5.99001e+07	3.66153e+07	5.9745e+07	1.62869e+08	1.00952e+08	3.77894e+07	2.55584e+07	4.51341e+07	4.4186e+07	3.0167e+07	3.62463e+07	6.43609e+07	6.17634e+07	3.61295e+07	3.49752e+07	3.48946e+07	7.02961e+07	6.11263e+07	6.45069e+07	5.16587e+07	5.22533e+07	9.84646e+07	6.67199e+07
AT1G62560.1	2.46408e+08	1.4183e+08	1.45512e+08	1.04096e+08	3.20219e+08	3.24959e+08	1.30643e+08	1.39189e+08	1.39887e+08	1.39797e+08	1.44477e+08	1.4751e+08	3.66945e+08	3.46244e+08	1.41626e+08	1.40541e+08	1.8647e+08	1.8648e+08	190847242	185102060	3.08938e+08	3.13155e+08	1.86582e+08	1.60932e+08	143313431	127287792	2.65467e+08	2.17711e+08	4.24183e+08	3.2455e+08	1.92252e+08	1.74154e+08	3.56052e+08	2.9649e+08	2.24374e+08	178729012	496808614	403093593	2.61059e+08	1.9755e+08	1.1485e+08	7.08047e+07	319064041	1.94714e+08	2.18124e+08	143331093	1.70201e+08	145849895
AT1G62570.1	5.77599e+06	1.1493e+06	2418662	1.97469e+06	4.16221e+06	3491211	2.14713e+06	2445449	3.43188e+06	3.00814e+06	2768467	3.00549e+06	3.62609e+06	4296998	3099818	2438600	2.02373e+06	1.72753e+06	4206827	3.94515e+06	3.30068e+06	3.54802e+06	6728543	5.41709e+06	1.54977e+06	2.06711e+06	3.01901e+06	1819666	1.98986e+06	2.00832e+06	5.47705e+06	5.10115e+06	6.72086e+06	4.68459e+06	4852978	5236465		3.06376e+06	3.53616e+06	3559986	3.95153e+06	2646660	5.08606e+06	3.09505e+06	3.06335e+06	2.71395e+06	4.84564e+06	2.86826e+06
AT1G62600.1	2.21455e+07	7.6681e+06	16487809	9.40995e+06	33907208		5.20887e+06	1.02953e+07	11277190	12224258	5.26222e+06	9.41986e+06	14685336	10859434	8.32753e+06	10017987	6163229	7.90701e+06	7974488	11514719			19062582	13689942	9840976	6977557		7.80182e+06	22022934	1.22866e+07	13361348															4.75508e+06	11491944	10405712
AT1G62640.2	3.76238e+07	1.47377e+07	1.84876e+07	1.01096e+07	2.25146e+07	1.74083e+07	1.57384e+07	12301959	1.50676e+07	1.17209e+07	1.2748e+07	1.58545e+07	1.97566e+07	1.54431e+07	1.2152e+07	1.14001e+07	1.4092e+07	1.1805e+07	1.7939e+07	1.29808e+07	1.79163e+07	1.58919e+07	1.56837e+07	1.35714e+07	1.51716e+07	1.15877e+07	2.09289e+07	1.83727e+07	3.83895e+07	2.06946e+07	1.91518e+07	14756708	1.93431e+07	1.76416e+07	1.53058e+07	1.46993e+07	2.14634e+07	2.14971e+07	9.00455e+06	1.61916e+07	1.68348e+07	9.20658e+06	1.67046e+07	1.61706e+07	1.45874e+07	1.6758e+07	2.7126e+07	1.37051e+07
AT1G62660.1	1.58549e+08	8.19026e+07	1.12269e+08	8.04762e+07	1.52772e+08	1.56278e+08	9.96236e+07	1.05439e+08	1.01584e+08	9.48917e+07	9.25371e+07	9.98262e+07	1.54913e+08	1.39341e+08	1.19665e+08	1.1001e+08	1.0155e+08	1.03109e+08	1.31423e+08	1.12409e+08	1.60016e+08	1.52122e+08	1.25229e+08	1.05129e+08	9.1104e+07	8.66165e+07	1.04619e+08	9.92589e+07	1.6346e+08	1.24718e+08	1.10321e+08	1.15223e+08	1.18864e+08	1.30399e+08	1.3793e+08	1.27301e+08	1.56512e+08	1.27295e+08	1.14142e+08	1.00892e+08	1.27574e+08	9.13076e+07	1.26179e+08	8.51241e+07	1.16082e+08	7.97703e+07	1.89723e+08	1.22661e+08
AT1G62740.1	2.51736e+08	1.15835e+08	2.59062e+08	1.53233e+08	1.6107e+08	1.69761e+08	1.67089e+08	1.13169e+08	1.58629e+08	1.38576e+08	1.5298e+08	1.77835e+08	1.84702e+08	1.62862e+08	1.60742e+08	1.57493e+08	1.21926e+08	1.16165e+08	1.82165e+08	1.62787e+08	1.74947e+08	1.63431e+08	1.94368e+08	1.45402e+08	2.14434e+08	1.92365e+08	1.43193e+08	1.74241e+08	2.17113e+08	1.5525e+08	2.14117e+08	1.60288e+08	2.00852e+08	1.75932e+08	1.7538e+08	1.52144e+08	2.26139e+08	1.68448e+08	1.75737e+08	1.53696e+08	1.45496e+08	1.19798e+08	2.10716e+08	1.89915e+08	1.68136e+08	1.61883e+08	3.03573e+08	1.77708e+08
AT1G62750.1	2.86985e+09	1.43066e+09	2.50457e+09	1.68155e+09	3.02884e+09	2.87803e+09	1.75584e+09	1.76762e+09	2.35201e+09	2.06108e+09	1.73806e+09	2.19021e+09	3.15406e+09	2.90622e+09	2.35939e+09	2.24391e+09	2.06666e+09	1.97635e+09	2.3347e+09	2.21185e+09	2.6683e+09	2.86334e+09	2.41016e+09	1.90344e+09	2.38305e+09	2.10135e+09	2.41083e+09	2.65375e+09	2.97736e+09	2.44394e+09	2.62065e+09	1.97679e+09	2.57181e+09	2.55497e+09	1.79057e+09	1.73783e+09	3.54166e+09	3.12645e+09	2.17436e+09	2.01028e+09	2.03282e+09	1.52625e+09	3.08319e+09	2.19397e+09	2.27616e+09	1.87016e+09	2.94729e+09	1.9072e+09
AT1G62780.1	8.43322e+08	4.4327e+08	6.68263e+08	4.10715e+08	3.59496e+08	3.38801e+08	3.86595e+08	3.83627e+08	4.9618e+08	4.63889e+08	3.06753e+08	3.67277e+08	8.58895e+08	7.51758e+08	4.36926e+08	5.14807e+08	3.51628e+08	3.99143e+08	4.36443e+08	4.6245e+08	3.5339e+08	3.66222e+08	4.96264e+08	4.20238e+08	7.80412e+08	6.71971e+08	4.00936e+08	7.22616e+08	8.68603e+08	6.62969e+08	6.18815e+08	2.98122e+08	3.4081e+08	3.39443e+08	2.72128e+08	2.46784e+08	2.88146e+08	4.20202e+08	3.3125e+08	3.46048e+08	3.45741e+08	3.21751e+08	4.42401e+08	3.87986e+08	3.23724e+08	3.53325e+08	6.1019e+08	4.76846e+08
AT1G62800.2	9776878	5.6123e+06	9885052	5.41186e+06			4013326	3.15946e+06	5167937	4287627	2.38664e+06	2232656	5328586	3359446	2.88381e+06	3.50674e+06		2.50122e+06	3.84717e+06	4933484			3657978	1.82807e+06	6130434	5.08698e+06		5.12041e+06	10227023	6.37091e+06																	3.10287e+06	2.9288e+06
AT1G62820.1	6.78572e+07	2.57474e+07	5.37705e+07	2.14973e+07	9218371	8.71279e+06	3.0987e+07	3.0397e+07	3.62086e+07	31722861	2.8986e+07	2.8348e+07	3.04248e+07	2.41472e+07	2.90347e+07	3.03213e+07	3.24491e+07	3.49089e+07	3.58934e+07	3.08794e+07	1.66821e+07	1.321e+07	3.6892e+07	3.41845e+07	2.43551e+07	1.43972e+07	10542587	2.10646e+07	49470607	2.22414e+07	1.63252e+07	4.94057e+06	8.77362e+06	9.19675e+06	9.3831e+06	9.30097e+06	1.44338e+07	7.84309e+06	7.33095e+06	5.25232e+06	5.57216e+06	4.94071e+06	9343275	8.21862e+06	1.05648e+07	8.96633e+06	3.48534e+07	2.19461e+07
AT1G63000.1	6.02848e+08	1.89623e+08	1.86004e+08	1.34795e+08	1.9243e+08	2.10873e+08	2.3643e+08	2.41735e+08	2.26564e+08	2.02897e+08	2.44095e+08	2.70074e+08	2.47605e+08	1.989e+08	2.06398e+08	2.10513e+08	2.76447e+08	250688637	3.09488e+08	2.43677e+08	2.64006e+08	3.18206e+08	3.67181e+08	2.85683e+08	1.91007e+08	156906935	2.25326e+08	1.73603e+08	2.62373e+08	1.81423e+08	2.45386e+08	2.23454e+08	236519275	2.32088e+08	2.67952e+08	2.27366e+08	1.82978e+08	2.30339e+08	1.97003e+08	1.45089e+08	1.84642e+08	1.39394e+08	2.87469e+08	2.31429e+08	2.32735e+08	1.66778e+08	3.54146e+08	2.09292e+08
AT1G63460.1	1.6281e+07	5.03205e+06	1.21422e+07	4.20289e+06	4.01223e+06	3.12857e+06	4.25729e+06	5.64777e+06	6.24939e+06	7.08686e+06	4.68186e+06	5.80886e+06	8.88356e+06	7.95879e+06	7.48295e+06	6.38295e+06	3.18003e+06	4.29394e+06	6.37741e+06	7.66592e+06	4.68051e+06	5.34385e+06	9.09461e+06	7.38709e+06	1.21374e+07	8.78054e+06	2.44648e+06	8.03306e+06	1.09198e+07	6.25501e+06	2.00294e+07	1.30513e+07	7.18756e+06	3.02862e+06	7.40965e+06	3599914	3.33715e+06	3.15786e+06	4.27234e+06	8.2558e+06	9.68356e+06	1.38642e+07	4267872	2.51911e+06	7.7702e+06	9.4294e+06	1.07364e+07	7.98438e+06
AT1G63500.1	24481941	6.63347e+06	8.93915e+06	6.1668e+06	1.71781e+07	2.22823e+07	7.44356e+06	1.19917e+07	8.44782e+06	1.17579e+07	1.31216e+07	9.55737e+06	1.78269e+07	1.89522e+07	1.04084e+07	9.43735e+06	9.93063e+06	1.38456e+07	9.8977e+06	8770418	1.60508e+07	1.59235e+07	2.13804e+07	9.80546e+06	1.30323e+07	1.05547e+07	1.14954e+07	9.8325e+06	2.39123e+07	1.90084e+07	1.10363e+07	11836860	1.35361e+07	1.65954e+07	1.72109e+07	1.62873e+07	2.15956e+07	1.50485e+07	1.46413e+07	1.43652e+07	1.71742e+07	1.38969e+07	1.70953e+07	1.81193e+07	1.07812e+07	1.20382e+07	2.30857e+07	1.54577e+07
AT1G63610.2	2245885176	374343436	767312480	219897984	765721128	656749240	534262320	468706482	4.90205e+08	416518032	602930262	487668418	562267536	452702330	462884244	303680476	728689832	509562422	562058560	392700618	757288312	678747906	771649462	588477780	265847109	188571773	402972944	213703563	666087230	321290462	321646712	279167372	442874304	403172015	508862264	397943530	807012236	380419728	350447992	256827468	538231332	329665178	524439684	459918938	434651612	313430377	641085612	250671112
AT1G63660.1	3.89962e+08	1.66012e+08	2.61407e+08	1.68595e+08	2.50799e+08	2.64223e+08	2.12986e+08	2.10047e+08	2.19137e+08	1.95282e+08	2.05756e+08	2.25226e+08	2.73986e+08	2.5864e+08	2.10067e+08	2.11875e+08	1.85269e+08	1.83164e+08	2.61321e+08	2.41365e+08	2.49632e+08	2.54577e+08	2.65627e+08	2.02979e+08	2.25671e+08	1.89788e+08	2.34065e+08	2.3898e+08	2.933e+08	2.37487e+08	2.8644e+08	2.75735e+08	3.28959e+08	3.04151e+08	2.92943e+08	2.50849e+08	2.18397e+08	2.36892e+08	2.66522e+08	2.59125e+08	2.47143e+08	1.9107e+08	3.67123e+08	3.26129e+08	2.97445e+08	2.61882e+08	4.13602e+08	2.70391e+08
AT1G63680.2	40864727	1.18934e+07	2.15736e+07	1.11225e+07	33989062	2.94634e+07	2.18608e+07	2.13956e+07	2.0463e+07	1.68901e+07	2.38288e+07	2.39617e+07	2.68724e+07	2.07304e+07	2.06766e+07	1.25672e+07	2.43231e+07	2.23269e+07	2.44291e+07	1.9928e+07	3.09611e+07	2.65594e+07	2.21365e+07	1.99e+07	1.39937e+07	1.02063e+07	18285171	1.35233e+07	2.895e+07	1.95226e+07	18635860	1.5822e+07	2.66568e+07	2.29373e+07	2.81778e+07	2.59817e+07	3.89288e+07	26178080	2.26172e+07	1.8045e+07	2.27272e+07	1.48552e+07	2.69221e+07	2.11365e+07	2.23164e+07	1.45066e+07	4.36963e+07	1.75113e+07
AT1G63770.4	7.15042e+08	3.22212e+08	5.29548e+08	3.30838e+08	1.04926e+09	9.90146e+08	6.10303e+08	6.43669e+08	7.12798e+08	6.7881e+08	6.43375e+08	7.87985e+08	1.03459e+09	9.46961e+08	6.72531e+08	5.735e+08	6.88272e+08	4.72224e+08	8.26469e+08	7.5733e+08	1.14245e+09	1.12117e+09	8.54938e+08	5.37286e+08	4.39593e+08	4.13933e+08	6.86931e+08	5.88412e+08	6.87839e+08	6.61182e+08	6.81958e+08	6.04143e+08	8.21036e+08	8.23681e+08	6.5117e+08	6.09657e+08	9.61785e+08	8.55093e+08	5.86723e+08	5.89191e+08	5.82073e+08	4.08649e+08	8.80246e+08	6.72137e+08	6.96745e+08	5.84187e+08	9.54949e+08	5.58683e+08
AT1G63940.2	3.92696e+09	1.20267e+09	1.7215e+09	9.31098e+08	1.8406e+09	1.70546e+09	1.51446e+09	1.54459e+09	1.60639e+09	1.4639e+09	1.68794e+09	1.91158e+09	1.97694e+09	1.75607e+09	1.54303e+09	1.62754e+09	1.70946e+09	1.59243e+09	1.76438e+09	1.68819e+09	2.06112e+09	2.07495e+09	2.31602e+09	1.85909e+09	1.42362e+09	1.25661e+09	1.87123e+09	1.45647e+09	1.94016e+09	1.34825e+09	1.69347e+09	1.53046e+09	2.0482e+09	1.93328e+09	2.08036e+09	1.87967e+09	2.41004e+09	1.75171e+09	1.69322e+09	1.62319e+09	1.34187e+09	1.36612e+09	2.51265e+09	2.09264e+09	2.29635e+09	1.84397e+09	2.70146e+09	1627064083
AT1G63970.1	3.03839e+07	2.80894e+07	4.2052e+07	3.99337e+07	1.04521e+08	1.04155e+08	4.41055e+07	4.97868e+07	5.49118e+07	5.18695e+07	49032684	6.16302e+07	9.43116e+07	8.87336e+07	6.03399e+07	5.21678e+07	5.30754e+07	4.24363e+07	6.26492e+07	5.44211e+07	7.64347e+07	8.05556e+07	5.09173e+07	3.84076e+07	5.67507e+07	5.39033e+07	8.334e+07	8.36756e+07	6.01769e+07	60984427	7.75387e+07	6.2643e+07	8.51627e+07	8.99457e+07	4.94129e+07	5.12346e+07	1.2457e+08	1.18432e+08	7.31854e+07	7.15882e+07	5.09903e+07	3.64204e+07	9.77529e+07	7.45556e+07	6.18087e+07	5.41513e+07	8.68426e+07	5.2841e+07
AT1G64050.1	70521816	5.41482e+07	22237922	3.3727e+07	1.00099e+08	102393744	83356088	90232680	100412536	7.36695e+07	7.73078e+07	92602904	107557432	1.00005e+08	6.08298e+07	6.98459e+07	55567044	73322472	112010968	108941024	119757144	119438400	1.10922e+08	92973632	64935568	58002616	6.9615e+07	65330108	86475064	76217192	105694920	9.7913e+07	122752968	125296728	1.12394e+08	99996312	7.02463e+07	6.78165e+07	6.55391e+07	74518096	5.10951e+07	42546252	1.32101e+08	125075328	117880048	106549488	146898592	1.00238e+08
AT1G64090.1	5.03164e+07	4.83196e+07	7.30786e+07	4.23573e+07	3.83642e+07	4.30957e+07	6.10929e+07	5.49569e+07	6.18341e+07	5.70928e+07	5.7926e+07	6.322e+07	6.21668e+07	5.54433e+07	5.28104e+07	5.53689e+07	4.41172e+07	4.79126e+07	7.30525e+07	7.31346e+07	6.20045e+07	4.70877e+07	8.3438e+07	6.73344e+07	5.28972e+07	4.47202e+07	3.34111e+07	3.91326e+07	7.9252e+07	5.28813e+07	7.93546e+07	4.17375e+07	6.82654e+07	58446617	6.49732e+07	5.59843e+07	5.55684e+07	4.31249e+07	3.94001e+07	3.5357e+07	3.0362e+07	2.17459e+07	8.66459e+07	6.41102e+07	5.02616e+07	4.63699e+07	9.64562e+07	7.62594e+07
AT1G64190.1	2.3347e+08	7.18897e+07	1.77508e+08	1.10988e+08	2.75272e+08	2.72756e+08	1.34059e+08	142649825	1.5693e+08	1.43732e+08	1.80336e+08	1.88923e+08	2.37354e+08	2.20269e+08	1.88182e+08	1.52389e+08	1.72516e+08	1.61566e+08	2.03776e+08	1.74939e+08	2.8277e+08	2.87976e+08	1.97874e+08	1.73086e+08	1.16829e+08	1.074e+08	1.97832e+08	1.56031e+08	2.02439e+08	1.74531e+08	1.80174e+08	1.53954e+08	2.26711e+08	2.15985e+08	2.43609e+08	2.03937e+08	3.1302e+08	268322155	1.93672e+08	1.70291e+08	1.43739e+08	9.45669e+07	2.91175e+08	2.14154e+08	1.98053e+08	1.67768e+08	2.67989e+08	1.50503e+08
AT1G64400.1	360686	315439	231697	229611	1.07383e+06	1170710	345293	414031	384081	420681	675902	631613	1.23532e+06	1.08247e+06	490168	477367	565021	533865	679678	589420	1.01301e+06	1.01319e+06	688417	585182	317524	327593	780102	587048	510871	446444	545222	446560	789277	685510	596715	688217	1.1704e+06	834859	686937	553947	516743	306177	905118	515385	672156	475231	627209	585062
AT1G64440.1	1.19862e+09	7.63628e+08	1.30561e+09	5.80538e+08	1.47349e+07	1.34873e+07	4.2023e+08	3.83768e+08	4.67084e+08	336923530	2.31579e+08	1.61813e+08	4.34839e+08	1.97806e+08	3.44254e+08	4.61365e+08	1.35793e+08	2.66287e+08	4.38427e+08	3.77372e+08	23533284	3.22891e+07	5.37826e+08	2.77876e+08	6.32416e+08	5.07639e+08	2.20981e+07	5.06963e+08	1.22216e+09	7.50542e+08	3.58248e+07	3.25381e+07	3.61295e+07	2.41912e+07	4.2806e+07	2.7663e+07	2.29265e+06		2.59569e+07	2.29089e+07	2.54411e+07	2.08919e+07	31953496	2.18289e+07	4.38476e+07	3.02479e+07	7.21522e+08	6.47987e+08
AT1G64500.1			2840447		1.27928e+06	1.63562e+06		440486	1.68062e+06	16043.1	1.25077e+06	976844	34199.5	1663757	451993	45311.1	510411	371842	715503	479115	583186	185755	631542		1.03726e+07	11454162	1.91929e+06	892629	1.72101e+06	1.28611e+06	1.27446e+06	3071389	3.06242e+06	2.05091e+06	3.07529e+06	1.97136e+06	1.44153e+06	79469.4	1.48167e+06	2.04334e+06	545924		2.14035e+06	905311	2.24082e+06	1.72902e+06		815795
AT1G64510.2	7.61148e+07	4.18735e+07	2.45844e+07	3.82515e+07	1.40406e+08	1.37535e+08	5.81345e+07	6.91658e+07	8.33295e+07	5.43076e+07	60967964	7.07096e+07	1.72763e+08	1.30701e+08	6.71882e+07	8.60063e+07	7.04059e+07	8.05625e+07	8.78991e+07	8.36983e+07	1.1184e+08	111825219	7.22812e+07	59368630	7.73814e+07	6.37405e+07	1.3458e+08	1.13349e+08	1.26325e+08	127753288	1.21652e+08	1.07289e+08	1.48265e+08	1.30774e+08	1.10175e+08	97719497	2.41304e+08	2.06223e+08	129021704	1.16993e+08	1.07633e+08	4.95289e+07	1.749e+08	1.14838e+08	9.68162e+07	6.60281e+07	122254573	6.86967e+07
AT1G64520.1	1.71744e+08	1.04196e+08	1.8843e+08	1.05559e+08	1.38966e+08	1.41895e+08	1.18863e+08	1.26135e+08	1.49396e+08	1.17744e+08	1.14018e+08	1.24042e+08	2.257e+08	1.29055e+08	1.463e+08	1.24914e+08	7.08651e+07	8.6929e+07	1.69755e+08	1.42783e+08	1.55017e+08	1.60299e+08	1.56647e+08	7.40964e+07	1.91783e+08	1.7297e+08	1.15846e+08	1.92204e+08	3.2511e+08	2.34599e+08	1.31139e+08	9.36167e+07	1.56058e+08	1.45066e+08	9.80603e+07	1.01712e+08	1.72394e+08	1.52851e+08	1.03362e+08	1.07682e+08	9.27954e+07	5.71413e+07	1.783e+08	1.2512e+08	1.24238e+08	1.05307e+08	2.73245e+08	1.69928e+08
AT1G64550.1	4.08074e+07	1.57081e+07	3.31775e+07	1.43475e+07	1.77842e+07	1.19782e+07	1.48096e+07	2.02143e+07	2.62835e+07	2.34154e+07	1.75889e+07	2.52782e+07	3.49111e+07	2.68819e+07	2.07224e+07	1.90685e+07	2.05015e+07	2.06964e+07	2.48082e+07	1.676e+07	1.38754e+07	2.11712e+07	2.83199e+07	2.40964e+07	2.63352e+07	1.90856e+07	1.7716e+07	1.81426e+07	3.97215e+07	2.0922e+07	2.08199e+07	1.87481e+07	2.84608e+07	1.03288e+07	2.69419e+07	1.46361e+07	8.39281e+06	7.51452e+06	2.38408e+07	2.06762e+07	1.48585e+07	1.36027e+07	2.10486e+07	1.25462e+07	2.43017e+07	2.36403e+07	5.08628e+07	27159192
AT1G64710.1	9282832	4.27198e+06	5.80202e+06	3.95663e+06	18659888	18968933	9.46872e+06	1.16722e+07	1.07202e+07	9.48536e+06	1.17899e+07	1.45064e+07	1.80282e+07	1.50845e+07	9316106	9.80863e+06	7.04774e+06	6.82002e+06	13926250	1.52586e+07	2.06524e+07	2.12464e+07	1.44239e+07	1.33807e+07	8.8141e+06	8.11717e+06	1.25796e+07	9.62676e+06	1.21918e+07	1.26933e+07	18215322	15214327	23084465	1.93153e+07	2.2441e+07	19800447	2.20375e+07	1.68941e+07	1.17637e+07	1.12925e+07	9.31269e+06	4.81532e+06	23163268	1.51821e+07	14936088	11875264	2.08425e+07	13954791
AT1G64740.1	895921	479568	401590	227020	1.64744e+06	1.36227e+06	791809	1.12031e+06	897070	688295	1.12887e+06	1.06378e+06	1.58691e+06	1.68096e+06	668134	729187	1.05713e+06	866426	1.44828e+06	1.00701e+06	1.61048e+06	1.68721e+06	1.27228e+06		554293	855430	1.55503e+06	1.55029e+06	1.38812e+06	873143	1.86417e+06	1613769	2.29202e+06	2198158	1.86492e+06	1.78951e+06	2.50925e+06	2.4081e+06	1.5804e+06	1447305	1.22532e+06	578977	2.90571e+06	1.77749e+06		1233318	1.29862e+06	922042
AT1G64790.3	2.87241e+08	1.58611e+08	1.75798e+08	1.15218e+08	1.64682e+08	1.39572e+08	1.65096e+08	1.94317e+08	1.65554e+08	1.59611e+08	1.82586e+08	1.1407e+08	2.62482e+08	2.47905e+08	1.3913e+08	1.74564e+08	1.44308e+08	1.48282e+08	2.03569e+08	2.28284e+08	1.13865e+08	1.22231e+08	2.87993e+08	2.36339e+08	1.98411e+08	1.95383e+08	1.8405e+08	1.81186e+08	2.26917e+08	2.02242e+08	2.10986e+08	1.9794e+08	2.8985e+08	1.76994e+08	2.5475e+08	1.88551e+08	1.44397e+08	1.41321e+08	1.77471e+08	2.16041e+08	1.44709e+08	1.57909e+08	3.19401e+08	2.18704e+08	1.87267e+08	1.58368e+08	3.39791e+08	2.67938e+08
AT1G64880.1	50465294	13567510	3.04269e+07	1.30333e+07	3.44916e+07	32715444	30429071	3.35133e+07	42408552	3.73062e+07	3.19743e+07	4.15238e+07	43167892	41025073	56132050	3.1881e+07	2.58164e+07	2.82546e+07	40192290	4.2501e+07	34796712	4.895e+07	3.80308e+07	3.99665e+07	2.41785e+07	2.2939e+07	3.59859e+07	25236092	3.37003e+07	1.83736e+07	4.2557e+07	4.4954e+07	4.72012e+07	41605993	6.5824e+07	61255943	12365421	3.06368e+07	5.34012e+07	4.27005e+07	68291063	6.62031e+07	66849934	5.55245e+07	50645501	3.14911e+07	50271283	24090356
AT1G64970.1	5.62686e+06		6.17446e+06	3.99257e+06			870046	641821	1.58894e+06		2.07151e+06						2.28104e+06								8.36772e+06	5678030			9.24997e+06	6393004						1.22396e+06										2952355		971025
AT1G64980.2	2.41971e+07	4.84885e+06	6.70386e+06	3.59757e+06	1.23115e+07	1.24108e+07	6.90554e+06	6.38667e+06	7.20304e+06	5.89244e+06	7.20751e+06	6.2323e+06	1.0553e+07	7.82189e+06	7.47621e+06	5.45923e+06	9.42115e+06	7.65637e+06	9.67983e+06	5.71199e+06	1.59122e+07	1.16103e+07	1.12955e+07	1.06585e+07	7.87602e+06	5.12732e+06	7.26526e+06	9.46656e+06	9.54996e+06	5.82227e+06	1.24298e+07	8.95191e+06	9.78331e+06	9.15327e+06	8.48291e+06	8.33041e+06	1.73679e+07	1.2485e+07	1.0634e+07	9.16328e+06	1.26623e+07	7.61576e+06	1.21518e+07	8.28549e+06	1.0183e+07	8.13559e+06	1.42601e+07	8.33195e+06
AT1G65010.1	1.98441e+07	1.74606e+06	5.64678e+06	3.3466e+06	13566969	18100419	4.33008e+06	6385992	9951769	10792151	1.4165e+07	6.63349e+06	9592968	11791401	8.92952e+06	7.61329e+06	7.302e+06	7539132	9.38519e+06	8021359	1.39299e+07	10294183	7.86633e+06	6.57613e+06	1505806	1.28635e+06	6.23376e+06	1.71534e+06	6960954	3.95806e+06	1.75501e+06	1.34516e+06	3.89333e+06	1.12715e+06	2.24421e+06	2.13643e+06	14095805	8.9844e+06			1814937	1.13623e+06	6.06149e+06	2.69145e+06	2.88013e+06	2.78202e+06	2500923	1.15513e+06
AT1G65260.1	1.15362e+08	5.91923e+07	9.13766e+07	5.25987e+07	1.19835e+08	1.24375e+08	7.86731e+07	73054207	7.8043e+07	7.14387e+07	72236772	7.81212e+07	1.07153e+08	9.79043e+07	9.32563e+07	7.86262e+07	8.32944e+07	6.97153e+07	81532033	6.78848e+07	9.25328e+07	8.91756e+07	8.76053e+07	6.90679e+07	9.34408e+07	8.8121e+07	1.02502e+08	8.82894e+07	1.02297e+08	7.48996e+07	98107126	9.36216e+07	9.98139e+07	9.53393e+07	8.28465e+07	8.19683e+07	1.48358e+08	1.17725e+08	9.81637e+07	9.00575e+07	1.36393e+08	9.29524e+07	1.11192e+08	9.64167e+07	9.10463e+07	78658839	1.36063e+08	7.23016e+07
AT1G65270.2	2.85055e+07	1.61772e+07	2.89024e+07	2.49499e+07	75989849	6.48597e+07	2.7377e+07	3.21098e+07	4.97131e+07	5.4836e+07	4.50085e+07	67851758	5.89384e+07	5.74949e+07	4.26318e+07	3.60818e+07	4.10842e+07	37797516	6.73584e+07	62004122	8.1129e+07	7.59089e+07	72811716	5.72046e+07	5.05246e+07	46013395	5.85646e+07	6.36068e+07	68980581	50718790	9.31612e+07	7.24232e+07	1.11197e+08	1.00683e+08	6.46019e+07	6.2544e+07	9.2698e+07	8.82185e+07	5.26845e+07	5.38864e+07	56721589	3.881e+07	1.42457e+08	9.07629e+07	7.23325e+07	6.93493e+07	9.89862e+07	5.93976e+07
AT1G65290.1	131935838	66360239	1.48422e+08	67732009	93597030	101503648	73622346	63639271	67869798	60239422	94101020	7.98768e+07	67302635	6.7138e+07	95251642	74156597	82571096	66418633	80191620	63855624	79763266	83869267	98333902	87352420	82578584	78380224	83459642	6.32475e+07	54781107	3.35995e+07	92375482	90540887	101756522	86316272	1.01596e+08	1.01989e+08	135912868	99359438	99034924	78570025	135029366	1.11265e+08	1.19967e+08	1.08105e+08	1.00518e+08	8.34225e+07	154180799	93502489
AT1G65440.1	2.18099e+07	8.24748e+06	2.90376e+07	1.33731e+07	1.73962e+07	1.18927e+07	6.78717e+06	7.07649e+06	7.81051e+06	8.50599e+06	1.14015e+07	1.17174e+07	1.23972e+07	13018037	1.27826e+07	9.36538e+06	1.30074e+07	8.83251e+06	9.63312e+06	6.66748e+06	9.57544e+06	7280743	1.56571e+07	1.47276e+07	8.12046e+06	6.27182e+06	7628472	6.7628e+06	6.77434e+06	6.70255e+06	8.14874e+06	1.39242e+07	9.84294e+06	7.99657e+06	1.05676e+07	5.45026e+06	1.59468e+07	8864200	9.51813e+06	1.3204e+07	1.38693e+07	1.48886e+07	8.72493e+06	7.15819e+06	1.2956e+07	1.5809e+07	12759370	9814728
AT1G65540.3	4.28393e+06	3.03619e+06	2.12147e+06	3.08761e+06	8.91842e+06	9.18046e+06	4.77381e+06	5.26566e+06	6.40709e+06	3.94134e+06	4.17399e+06	5.45386e+06	8.55997e+06	8.40174e+06	3.71005e+06	4.74156e+06	3.42606e+06	4.56475e+06	6.50502e+06	6.15249e+06	7.91293e+06	8.65753e+06	5.88479e+06	4.7127e+06	6.9739e+06	6.02306e+06	8.33866e+06	6.81526e+06	8.76682e+06	8.68645e+06	9.21282e+06	8.31638e+06	1.37526e+07	1.29144e+07	1.00872e+07	9.6949e+06	15240339	1.41045e+07	8.82201e+06	7.67592e+06	6.85543e+06	3.72054e+06	1.8351e+07	1.30696e+07	1.00397e+07	6.71221e+06	7.59341e+06	6.07832e+06
AT1G65590.1	4.37412e+07	7062096	1.69581e+07	7.20918e+06	8.38039e+06	8.43589e+06	1.27217e+07	1.55305e+07	1.32982e+07	1.45716e+07	8.9528e+06	1.42614e+07	1.92836e+07	1.67251e+07	1.2325e+07	1.38871e+07	1.21216e+07	1.48699e+07	1.6726e+07	1.50771e+07	7.68207e+06	1.49939e+07	1.93285e+07	1.66319e+07	1.38518e+07	1.05915e+07	1.43669e+07	1.23524e+07	2.53527e+07	1.65861e+07	1.62327e+07	1.33515e+07	1.93574e+07	1.25022e+07	1.83953e+07	1.35382e+07	6.23973e+06	6.09743e+06	1.09638e+07	1.23456e+07	8.49092e+06	1.12008e+07	1.6896e+07	1.24743e+07	1.72197e+07	1.45573e+07	2.16923e+07	1.32285e+07
AT1G65650.1	1.90797e+08	5.70029e+07	1.7224e+08	75992178	9.21896e+07	91951812	8.88781e+07	7.78156e+07	86627628	77067089	1.1295e+08	112105230	88571051	79210715	9.99866e+07	7.54387e+07	109060854	85675977	103677732	8.40002e+07	1.03226e+08	9.38677e+07	119018100	86867980	103123020	5.94994e+07	108093446	99471493	121024888	77026351	1.05542e+08	6.62316e+07	108599237	123356212	130122800	1.11158e+08	176850244	1.22474e+08	8.35814e+07	89449415	1.10029e+08	7.88719e+07	1.40635e+08	117663870	1.2312e+08	110002772	211878866	97086440
AT1G65930.1	6.39765e+09	2.10527e+09	4.10637e+09	2.11597e+09	3.78067e+09	3.56237e+09	2.89787e+09	2.80007e+09	3.04566e+09	2.77924e+09	3.05069e+09	3.21696e+09	3.91953e+09	3.49682e+09	2.81322e+09	2.48291e+09	2.90357e+09	2.53376e+09	3.40242e+09	3.07101e+09	4.27608e+09	4.04553e+09	3.71043e+09	3.09755e+09	2.58108e+09	2.44017e+09	3.09832e+09	2.67456e+09	4.34962e+09	2.94078e+09	3.59591e+09	3.10656e+09	4.39503e+09	4.12801e+09	4.1925e+09	3.81522e+09	3.86137e+09	3.67197e+09	3.1919e+09	2.86323e+09	3.07111e+09	2.25105e+09	4.63294e+09	3.50173e+09	3.90843e+09	3.05318e+09	5.29464e+09	3.15335e+09
AT1G65960.2	9.97827e+08	5.86627e+08	8.58411e+08	6.03348e+08	735020878	6.29382e+08	8.12907e+08	8.69857e+08	8.73806e+08	8.5333e+08	7.40388e+08	9.26122e+08	1.07685e+09	1.02278e+09	7.57959e+08	7.73608e+08	6.46781e+08	6.92518e+08	8.76671e+08	8.89065e+08	7.92569e+08	8.058e+08	1.00853e+09	7.89378e+08	7.18368e+08	7.86782e+08	6.72167e+08	8.76759e+08	9.0769e+08	8.0747e+08	8.99605e+08	8.38922e+08	8.17046e+08	8.16188e+08	6.99847e+08	6.42122e+08	5.66869e+08	6.31763e+08	629608303	7.73392e+08	6.00651e+08	6.41442e+08	8.56993e+08	7.55019e+08	865101516	9.30697e+08	1.02171e+09	7.77126e+08
AT1G65980.1	7.11184e+07	3.98124e+07	1.15759e+08	5.50281e+07	1.7783e+08	1.80087e+08	5.38983e+07	1.04402e+08	9.94841e+07	8.68584e+07	1.1075e+08	1.28648e+08	1.61101e+08	2.15476e+08	1.08046e+08	9.30304e+07	1.044e+08	1.0488e+08	1.44385e+08	1.25531e+08	2.4099e+08	2.47168e+08	1.35049e+08	1.13692e+08	2.09691e+08	1.21566e+08	1.84447e+08	2.62413e+08	1.03525e+08	1.09282e+08	2.28598e+08	2.09243e+08	2.81251e+08	2.43635e+08	2.27675e+08	2.16811e+08	377154226	3.21529e+08	2.15413e+08	1.81016e+08	1.4468e+08	1.21806e+08	3.69996e+08	2.26866e+08	2.17234e+08	2.21467e+08	3.72528e+08	2.804e+08
[truncated: 3,061 more rows]

## Sheet: Suppl. File 1b
Supplemental File1b. Normalized protein abundances based on the average of two technical replicates or used directly if the proteins were only detected in one technical replicate.
[truncated: 3,807 more rows]

## Sheet: Suppl. File 1c
Supplemental File1c. Protein abundances expressed as Log2 values.
[truncated: 3,807 more rows]

## Sheet: Suppl File 1d
Supplemental File1d: Relative changes of protein abundance between LL and HL conditions in WT plants.
[truncated: 3,683 more rows]

## Sheet: Suppl. File 1e
Supplemental File1e: Relative changes of protein abundance between LL and HL conditions in the atg7 mutant.
[truncated: 3,694 more rows]

[truncated: 9 more sheets: Suppl. File 1f, Suppl. File 1g, Suppl. File 1h, Suppl. File 1i, Suppl. File 1j, Suppl. File 1k, Suppl. File 1l, Suppl. File 1m, Suppl. File 1n]
